# Supplementary material for: m6A and miRNA jointly regulate the development of breast muscles in duck embryonic stages
Source: Front Vet Sci. 2022 Oct 24;9:933850. doi: 10.3389/fvets.2022.933850 (PMC9637736; doi:10.3389/fvets.2022.933850)
Supplement: Supplementary file 1 [file Table_1.XLSX]

## Sheet: Sheet1
Supplementary file 1. Conjoint analysis of MMGs and DEGs between E19 and E27.
PEAK information													m6A regulation information					gene regulation information
seqnames	start	end	width	geneId	transcriptId	distanceToTSS	geneName	GO	KEGG	KO_ENTRY	EC	Description	peak_annotation	diff.lg.fdr	diff.lg.p	diff.log2.fc	m6A_regulation	fc	log2(fc)	pval	qval	gene_regulation	significant	FPKM.RL15_1_input	FPKM.RL15_2_input	FPKM.RL15_3_input	FPKM.RL27_1_input	FPKM.RL27_2_input	FPKM.RL27_3_input
chr1	628977	629157	181	ENSAPLG00000023384	ENSAPLT00000030366	104831		GO:0000145(exocyst);GO:0090522(vesicle tethering involved in exocytosis)	NA	NA	NA		Exon (ENSAPLT00000030366/ENSAPLG00000023384, exon 9 of 9)	-2.14	-3.08	-0.537	down	3.33214	1.73645	2.37178e-09	1.00363e-08	up	yes	58.1478	49.5587	58.564	15.202	17.3688	17.3281
chr1	637844	639100	1257	ENSAPLG00000016462	ENSAPLT00000025468	58		GO:0005515(protein binding)	NA	NA	NA		Exon (ENSAPLT00000025468/ENSAPLG00000016462, exon 1 of 4)	-0.647	-1.09	-2.04	down	3.77554	1.91668	1	1	up	no	3.35508	0.202562	0.279621	0	0	1.01635
chr1	920806	921255	450	ENSAPLG00000007258	ENSAPLT00000007526	0	CALML3	GO:0005509(calcium ion binding);GO:0019722(calcium-mediated signaling)	04371(Apelin signaling pathway);04020(Calcium signaling pathway);04070(Phosphatidylinositol signaling system);04114(Oocyte meiosis);04218(Cellular senescence);04625(C-type lectin receptor signaling pathway);04910(Insulin signaling pathway);04912(GnRH signaling pathway);04916(Melanogenesis);04261(Adrenergic signaling in cardiomyocytes);04270(Vascular smooth muscle contraction);04744(Phototransduct…	K02183	NA	calmodulin like 3 [Source:HGNC Symbol;Acc:HGNC:1452]	Exon (ENSAPLT00000007526/ENSAPLG00000007258, exon 1 of 1)	-1.94	-2.84	3.59	up	3521.58	11.782	5.86389e-149	2.16231e-146	up	yes	1677.87	1490.7	1678.64	0.529857	0.846572	0
chr1	1658469	1779532	121064	ENSAPLG00000005618	ENSAPLT00000005804	0	CHCHD3	GO:0005739(mitochondrion);GO:0005743(mitochondrial inner membrane);GO:0032947(protein-containing complex scaffold activity);GO:0061617(MICOS complex);GO:0061617(MICOS complex)	NA	NA	NA	coiled-coil-helix-coiled-coil-helix domain containing 3 [Source:HGNC Symbol;Acc:HGNC:21906]	5' UTR	-7.41	-9.03	0.172	up	0.557253	-0.843597	1.19873e-06	3.77113e-06	down	no	81.4957	78.3333	82.2171	130.664	143.819	159.873
chr1	4374272	4374482	211	ENSAPLG00000028842	ENSAPLT00000027782	40175		NA	NA	NA	NA		Exon (ENSAPLT00000027782/ENSAPLG00000028842, exon 5 of 5)	-0.288	-0.434	2.32	up	inf	inf	1	1	up	no	0.0889897	0.114292	0.325297	0	0	0
chr1	5684186	5685466	1281	ENSAPLG00000027360	ENSAPLT00000019209	17249	PROSER2	NA	NA	NA	NA	proline and serine rich 2 [Source:HGNC Symbol;Acc:HGNC:23728]	3' UTR	-18.9	-21.2	-1.03	down	6.69019	2.74205	1.03111e-09	4.51109e-09	up	yes	20.925	20.5177	27.3027	1.43657	5.16877	3.67022
chr1	5783462	5784677	1216	ENSAPLG00000005921	ENSAPLT00000006192	356	SEC61A2	GO:0015031(protein transport);GO:0016020(membrane);GO:0043022(ribosome binding)	03060(Protein export);04141(Protein processing in endoplasmic reticulum);04145(Phagosome)	K10956	NA	Sec61 translocon alpha 2 subunit [Source:HGNC Symbol;Acc:HGNC:17702]	5' UTR	-0.396	-0.661	-0.505	down	0.749019	-0.416925	0.00805225	0.0146192	down	no	14.2794	18.1821	16.7473	22.2264	21.0458	22.4254
chr1	6216715	6217726	1012	ENSAPLG00000004340	ENSAPLT00000004478	13018	MCM10	GO:0003690(double-stranded DNA binding);GO:0003697(single-stranded DNA binding);GO:0005634(nucleus);GO:0005730(nucleolus);GO:0006260(DNA replication);GO:0006270(DNA replication initiation);GO:0006974(cellular response to DNA damage stimulus);GO:0008283(cell population proliferation);GO:0019899(enzyme binding);GO:0042802(identical protein binding)	NA	NA	NA	minichromosome maintenance 10 replication initiation factor [Source:HGNC Symbol;Acc:HGNC:18043]	Exon (ENSAPLT00000004478/ENSAPLG00000004340, exon 16 of 20)	-0.726	-1.21	-2	down	139.414	7.12323	3.34034e-59	1.55356e-57	up	yes	38.9456	39.1634	31.3686	0.444064	0.234085	0.10712
chr1	12174717	12174807	91	ENSAPLG00000012129	ENSAPLT00000012624	389	FGL2	GO:0008233(peptidase activity)	NA	NA	NA	fibrinogen like 2 [Source:HGNC Symbol;Acc:HGNC:3696]	Exon (ENSAPLT00000012624/ENSAPLG00000012129, exon 1 of 2)	-0.286	-0.43	-2.46	down	-inf	-inf	4.49744e-10	2.03132e-09	down	yes	0	0	0	0.78663	1.00426	0.815713
chr1	12378207	12378296	90	ENSAPLG00000012048	ENSAPLT00000017822	0	PMPCB	GO:0003824(catalytic activity);GO:0004222(metalloendopeptidase activity);GO:0005739(mitochondrion);GO:0006508(proteolysis);GO:0006627(protein processing involved in protein targeting to mitochondrion);GO:0017087(mitochondrial processing peptidase complex);GO:0046872(metal ion binding);GO:0046872(metal ion binding)	NA	NA	NA	peptidase, mitochondrial processing beta subunit [Source:HGNC Symbol;Acc:HGNC:9119]	Exon (ENSAPLT00000017822/ENSAPLG00000012048, exon 1 of 12)	-0.638	-1.08	-0.926	down	1.08634	0.11947	0.516732	0.587733	up	no	49.313	50.7653	49.8354	45.3035	42.9256	49.7703
chr1	13891704	13892031	328	ENSAPLG00000006669	ENSAPLT00000006939	4709	PIK3CG	GO:0001932(regulation of protein phosphorylation);GO:0005737(cytoplasm);GO:0005886(plasma membrane);GO:0005944(phosphatidylinositol 3-kinase complex, class IB);GO:0006468(protein phosphorylation);GO:0007186(G protein-coupled receptor signaling pathway);GO:0014065(phosphatidylinositol 3-kinase signaling);GO:0016020(membrane);GO:0016301(kinase activity);GO:0016303(1-phosphatidylinositol-3-kinase ac…	00562(Inositol phosphate metabolism);04371(Apelin signaling pathway);04261(Adrenergic signaling in cardiomyocytes)	K21289	EC:2.7.1.153	phosphatidylinositol-4,5-bisphosphate 3-kinase catalytic subunit gamma [Source:HGNC Symbol;Acc:HGNC:8978]	Exon (ENSAPLT00000006939/ENSAPLG00000006669, exon 2 of 11)	-0.836	-1.37	-0.901	down	0.416453	-1.26377	0.00375955	0.00724474	down	yes	0.644486	0.525624	1.35287	1.99992	2.67781	1.38054
chr1	14827466	14827646	181	ENSAPLG00000013822	ENSAPLT00000014434	90	ABCD2	GO:0000038(very long-chain fatty acid metabolic process);GO:0005524(ATP binding);GO:0005777(peroxisome);GO:0006635(fatty acid beta-oxidation);GO:0016021(integral component of membrane);GO:0016887(ATPase activity);GO:0032000(positive regulation of fatty acid beta-oxidation);GO:0042626(ATPase activity, coupled to transmembrane movement of substances);GO:0042760(very long-chain fatty acid catabolic …	02010(ABC transporters);04146(Peroxisome)	K05676	NA	ATP binding cassette subfamily D member 2 [Source:HGNC Symbol;Acc:HGNC:66]	Exon (ENSAPLT00000014434/ENSAPLG00000013822, exon 1 of 10)	-0.996	-1.6	-1.24	down	0.144766	-2.78821	1.57344e-33	2.93245e-32	down	yes	6.19219	5.79419	6.29588	40.355	49.8952	36.0383
chr1	15173995	15174145	151	ENSAPLG00000015941	ENSAPLT00000036076	112008	CPNE8	NA	NA	NA	NA	copine 8 [Source:HGNC Symbol;Acc:HGNC:23498]	3' UTR	-1.62	-2.43	4.81	up	1.6865	0.754029	0.526179	0.597008	up	no	0.777184	0.396905	0.72453	0.323997	0.223593	0.578187
chr1	20261109	20261615	507	ENSAPLG00000002700	ENSAPLT00000002723	18371	PANX2	GO:0002931(response to ischemia);GO:0005737(cytoplasm);GO:0006812(cation transport);GO:0015267(channel activity);GO:0050716(positive regulation of interleukin-1 secretion);GO:0055085(transmembrane transport)	NA	NA	NA	pannexin 2 [Source:HGNC Symbol;Acc:HGNC:8600]	Exon (ENSAPLT00000002723/ENSAPLG00000002700, exon 2 of 3)	-0.804	-1.33	-2.61	down	9.52743	3.25209	1.44519e-08	5.64784e-08	up	yes	4.59359	3.53283	5.94356	0.517213	0.436484	0.523089
chr1	21980701	21989727	9027	ENSAPLG00000016011	ENSAPLT00000016726	120	POT1	GO:0000723(telomere maintenance);GO:0000781(chromosome, telomeric region);GO:0000783(nuclear telomere cap complex);GO:0000784(nuclear chromosome, telomeric region);GO:0003677(DNA binding);GO:0005634(nucleus);GO:0007004(telomere maintenance via telomerase);GO:0010521(telomerase inhibitor activity);GO:0016233(telomere capping);GO:0017151(DEAD/H-box RNA helicase binding);GO:0032202(telomere assembly…	NA	NA	NA	protection of telomeres 1 [Source:HGNC Symbol;Acc:HGNC:17284]	5' UTR	-1.8	-2.65	5	up	2.29921	1.20114	0.330442	0.401154	up	no	0.715957	0.1038	1.19707	0.434732	0.258551	0.1839
chr1	22100232	22112347	12116	ENSAPLG00000015956	ENSAPLT00000016642	599	GPR37	GO:0000151(ubiquitin ligase complex);GO:0004930(G protein-coupled receptor activity);GO:0005783(endoplasmic reticulum);GO:0005886(plasma membrane);GO:0007186(G protein-coupled receptor signaling pathway);GO:0007193(adenylate cyclase-inhibiting G protein-coupled receptor signaling pathway);GO:0008528(G protein-coupled peptide receptor activity);GO:0016021(integral component of membrane);GO:0030544…	NA	NA	NA	G protein-coupled receptor 37 [Source:HGNC Symbol;Acc:HGNC:4494]	3' UTR	-1.03	-1.65	3.41	up	102.217	6.67549	2.85084e-09	1.19654e-08	up	yes	3.38047	3.49101	4.97763	0	0.115921	0
chr1	22601713	22601861	149	ENSAPLG00000019976	ENSAPLT00000033892	4405	NDUFA5	GO:0005747(mitochondrial respiratory chain complex I);GO:0008137(NADH dehydrogenase (ubiquinone) activity);GO:0022904(respiratory electron transport chain);GO:0032981(mitochondrial respiratory chain complex I assembly);GO:0045271(respiratory chain complex I);GO:0045271(respiratory chain complex I)	00190(Oxidative phosphorylation);00190(Oxidative phosphorylation)	K03949	NA	NADH:ubiquinone oxidoreductase subunit A5 [Source:HGNC Symbol;Acc:HGNC:7688]	3' UTR	-2.09	-3.01	0.359	up	0.383805	-1.38155	2.49574e-11	1.28265e-10	down	yes	19.7105	15.7193	16.9427	48.5106	45.6565	42.2888
chr1	22608885	22612691	3807	ENSAPLG00000014571	ENSAPLT00000018751	4083	IQUB	GO:0001669(acrosomal vesicle);GO:0005515(protein binding);GO:0007224(smoothened signaling pathway);GO:0031514(motile cilium);GO:0060271(cilium assembly);GO:0060271(cilium assembly)	NA	NA	NA	IQ motif and ubiquitin domain containing [Source:HGNC Symbol;Acc:HGNC:21995]	Exon (ENSAPLT00000018751/ENSAPLG00000014571, exon 5 of 10)	-0.952	-1.54	-2.92	down	0.446812	-1.16226	1	1	down	no	0	0.197166	0	0	0.441273	0
chr1	22690141	22690707	567	ENSAPLG00000014367	ENSAPLT00000014990	54817		GO:0015991(ATP hydrolysis coupled proton transport);GO:0033180(proton-transporting V-type ATPase, V1 domain);GO:0046933(proton-transporting ATP synthase activity, rotational mechanism);GO:0046961(proton-transporting ATPase activity, rotational mechanism)	00190(Oxidative phosphorylation);04145(Phagosome);04142(Lysosome)	K03662	NA		3' UTR	-2.41	-3.4	-0.691	down	0.280911	-1.83182	2.11835e-13	1.2919e-12	down	yes	5.72439	5.7353	10.4703	29.2827	27.0433	21.7413
chr1	22927523	22927792	270	ENSAPLG00000014404	ENSAPLT00000024793	105515		GO:0016079(synaptic vesicle exocytosis);GO:1990504(dense core granule exocytosis);GO:1990504(dense core granule exocytosis)	NA	NA	NA		Exon (ENSAPLT00000024793/ENSAPLG00000014404, exon 3 of 24)	-1.05	-1.67	-1.04	down	0.274562	-1.8648	1.68911e-05	4.63216e-05	down	yes	0.472384	0.545441	0.917507	2.67561	2.89172	1.48147
chr1	30425000	30429392	4393	ENSAPLG00000003974	ENSAPLT00000004083	5820	PPHLN1	GO:0005654(nucleoplasm);GO:0005794(Golgi apparatus);GO:0005829(cytosol);GO:0045814(negative regulation of gene expression, epigenetic);GO:0045892(negative regulation of transcription, DNA-templated);GO:0090309(positive regulation of methylation-dependent chromatin silencing);GO:0097355(protein localization to heterochromatin)	NA	NA	NA	periphilin 1 [Source:HGNC Symbol;Acc:HGNC:19369]	Exon (ENSAPLT00000004083/ENSAPLG00000003974, exon 3 of 10)	-0.488	-0.823	-0.637	down	1.58542	0.664864	0.142152	0.192488	up	no	11.1045	10.5095	11.9843	6.94646	6.86247	7.38312
chr1	30951408	30951586	179	ENSAPLG00000012255	ENSAPLT00000030157	13350	IRAK4	GO:0000287(magnesium ion binding);GO:0001816(cytokine production);GO:0002446(neutrophil mediated immunity);GO:0004672(protein kinase activity);GO:0004674(protein serine/threonine kinase activity);GO:0005149(interleukin-1 receptor binding);GO:0005524(ATP binding);GO:0006468(protein phosphorylation);GO:0007165(signal transduction);GO:0019221(cytokine-mediated signaling pathway);GO:0043123(positive …	04010(MAPK signaling pathway);04620(Toll-like receptor signaling pathway);04621(NOD-like receptor signaling pathway);05164(Influenza A)	K04733	EC:2.7.11.1	interleukin 1 receptor associated kinase 4 [Source:HGNC Symbol;Acc:HGNC:17967]	3' UTR	-0.669	-1.13	2.87	up	0.975372	-0.0359761	0.630899	0.694979	down	no	0.736257	0.395912	1.12048	0.728031	0.727065	0.85443
chr1	31202916	31203066	151	ENSAPLG00000011678	ENSAPLT00000012151	210531	TMEM117	GO:0005783(endoplasmic reticulum);GO:0005886(plasma membrane);GO:0070059(intrinsic apoptotic signaling pathway in response to endoplasmic reticulum stress)	NA	NA	NA	transmembrane protein 117 [Source:HGNC Symbol;Acc:HGNC:25308]	Exon (ENSAPLT00000012151/ENSAPLG00000011678, exon 8 of 8)	-0.854	-1.4	-1.89	down	3.52769	1.81873	0.253761	0.319991	up	no	0.74199	0.365473	0.595986	0.0576908	0	0.425188
chr1	31731340	31732058	719	ENSAPLG00000010567	ENSAPLT00000011043	78354	ARID2	GO:0003007(heart morphogenesis);GO:0003676(nucleic acid binding);GO:0003677(DNA binding);GO:0005654(nucleoplasm);GO:0005886(plasma membrane);GO:0006337(nucleosome disassembly);GO:0006355(regulation of transcription, DNA-templated);GO:0008285(negative regulation of cell population proliferation);GO:0030336(negative regulation of cell migration);GO:0042592(homeostatic process);GO:0048568(embryonic …	NA	NA	NA	AT-rich interaction domain 2 [Source:HGNC Symbol;Acc:HGNC:18037]	Exon (ENSAPLT00000011043/ENSAPLG00000010567, exon 15 of 21)	-4.77	-6.12	-1.02	down	0.630751	-0.664857	0.00151577	0.00312257	down	no	3.73048	3.43269	6.0531	6.16598	9.37991	5.40733
chr1	35680028	35681362	1335	ENSAPLG00000014085	ENSAPLT00000014687	179	HELB	GO:0004003(ATP-dependent DNA helicase activity);GO:0005634(nucleus);GO:0005662(DNA replication factor A complex);GO:0005737(cytoplasm);GO:0006260(DNA replication);GO:0006261(DNA-dependent DNA replication);GO:0006269(DNA replication, synthesis of RNA primer);GO:0006974(cellular response to DNA damage stimulus);GO:0017116(single-stranded DNA-dependent ATP-dependent DNA helicase activity);GO:0035861…	NA	NA	NA	DNA helicase B [Source:HGNC Symbol;Acc:HGNC:17196]	Exon (ENSAPLT00000014687/ENSAPLG00000014085, exon 1 of 11)	-0.613	-1.04	-2.67	down	2.24038	1.16374	0.235575	0.300322	up	no	0.706019	0.874773	1.06721	0.623866	0.18723	0.370848
chr1	36077171	36077381	211	ENSAPLG00000012973	ENSAPLT00000013552	22029	CAND1	GO:0000151(ubiquitin ligase complex);GO:0005634(nucleus);GO:0005654(nucleoplasm);GO:0005737(cytoplasm);GO:0005794(Golgi apparatus);GO:0005829(cytosol);GO:0010265(SCF complex assembly);GO:0016567(protein ubiquitination);GO:0030154(cell differentiation);GO:0031461(cullin-RING ubiquitin ligase complex);GO:0043086(negative regulation of catalytic activity)	NA	NA	NA	cullin associated and neddylation dissociated 1 [Source:HGNC Symbol;Acc:HGNC:30688]	Exon (ENSAPLT00000013552/ENSAPLG00000012973, exon 10 of 15)	-1.26	-1.95	-0.744	down	2.0531	1.03781	0.000689354	0.00149341	up	yes	21.2594	21.2855	26.7803	13.3435	10.931	9.49148
chr1	36543130	36546146	3017	ENSAPLG00000011758	ENSAPLT00000012333	1992	NUP107	GO:0000776(kinetochore);GO:0005643(nuclear pore);GO:0006406(mRNA export from nucleus);GO:0008585(female gonad development);GO:0017056(structural constituent of nuclear pore);GO:0031080(nuclear pore outer ring);GO:0031965(nuclear membrane);GO:0034399(nuclear periphery);GO:0051292(nuclear pore complex assembly);GO:0072006(nephron development);GO:0072006(nephron development)	03013(RNA transport);03013(RNA transport)	K14301	NA	nucleoporin 107 [Source:HGNC Symbol;Acc:HGNC:29914]	Exon (ENSAPLT00000012333/ENSAPLG00000011758, exon 3 of 28)	-0.386	-0.641	-0.84	down	2.41452	1.27174	3.3054e-05	8.75567e-05	up	yes	21.1104	21.0461	27.8182	11.7529	9.64423	7.58366
chr1	36797037	36797972	936	ENSAPLG00000013136	ENSAPLT00000013735	30	CCT2	GO:0002199(zona pellucida receptor complex);GO:0005524(ATP binding);GO:0005829(cytosol);GO:0005832(chaperonin-containing T-complex);GO:0005874(microtubule);GO:0006457(protein folding);GO:0007339(binding of sperm to zona pellucida);GO:0031625(ubiquitin protein ligase binding);GO:0032212(positive regulation of telomere maintenance via telomerase);GO:0044183(protein folding chaperone);GO:0044297(cel…	NA	NA	NA	chaperonin containing TCP1 subunit 2 [Source:HGNC Symbol;Acc:HGNC:1615]	Exon (ENSAPLT00000013735/ENSAPLG00000013136, exon 1 of 16)	-2.06	-2.98	0.415	up	2.86812	1.52011	9.54442e-09	3.80781e-08	up	yes	356.448	334.551	330.581	115.428	127.45	113.306
chr1	37706612	37709160	2549	ENSAPLG00000002431	ENSAPLT00000029715	19846	TMEM19	GO:0016021(integral component of membrane);GO:0016021(integral component of membrane)	NA	NA	NA	transmembrane protein 19 [Source:HGNC Symbol;Acc:HGNC:25605]	3' UTR	-1.63	-2.45	0.627	up	2.04508	1.03216	0.0273983	0.0444302	up	yes	10.8618	10.3934	14.4541	6.43625	5.34111	5.68376
chr1	39707707	39707855	149	ENSAPLG00000014034	ENSAPLT00000014683	69819	ZDHHC17	GO:0000139(Golgi membrane);GO:0005515(protein binding);GO:0005794(Golgi apparatus);GO:0015095(magnesium ion transmembrane transporter activity);GO:0016235(aggresome);GO:0016409(palmitoyltransferase activity);GO:0018345(protein palmitoylation);GO:0019706(protein-cysteine S-palmitoyltransferase activity);GO:0030660(Golgi-associated vesicle membrane);GO:0042802(identical protein binding);GO:0042953(…	NA	NA	NA	zinc finger DHHC-type containing 17 [Source:HGNC Symbol;Acc:HGNC:18412]	3' UTR	-0.531	-0.901	1.22	up	0.191255	-2.38643	0.00016558	0.000396571	down	yes	0.72542	0.30839	0.420478	3.5206	2.89569	1.18762
chr1	41860007	41860680	674	ENSAPLG00000005880	ENSAPLT00000044047	26682	ZC3H7B	GO:0010608(posttranscriptional regulation of gene expression);GO:0035196(production of miRNAs involved in gene silencing by miRNA);GO:0035198(miRNA binding);GO:0046872(metal ion binding);GO:0046872(metal ion binding)	NA	NA	NA	zinc finger CCCH-type containing 7B [Source:HGNC Symbol;Acc:HGNC:30869]	Exon (ENSAPLT00000044047/ENSAPLG00000005880, exon 17 of 17)	-2.82	-3.89	0.697	up	0.801702	-0.318862	0.00606984	0.0112698	down	no	28.3511	27.2756	32.1832	39.6287	36.7793	33.1215
chr1	42052589	42053495	907	ENSAPLG00000003145	ENSAPLT00000003287	7280	SREBF2	GO:0000122(negative regulation of transcription by RNA polymerase II);GO:0000978(RNA polymerase II proximal promoter sequence-specific DNA binding);GO:0001227(DNA-binding transcription repressor activity, RNA polymerase II-specific);GO:0003677(DNA binding);GO:0003700(DNA-binding transcription factor activity);GO:0005634(nucleus);GO:0005654(nucleoplasm);GO:0005737(cytoplasm);GO:0005739(mitochondri…	NA	NA	NA	sterol regulatory element binding transcription factor 2 [Source:HGNC Symbol;Acc:HGNC:11290]	Exon (ENSAPLT00000003287/ENSAPLG00000003145, exon 7 of 19)	-0.997	-1.6	-0.46	down	5.01012	2.32484	1.06387e-15	7.58599e-15	up	yes	210.978	202.302	177.704	42.769	31.2796	43.9094
chr1	43265737	43266246	510	ENSAPLG00000001970	ENSAPLT00000001968	6747	GSG1	GO:0005783(endoplasmic reticulum);GO:0070063(RNA polymerase binding)	NA	NA	NA	germ cell associated 1 [Source:HGNC Symbol;Acc:HGNC:19716]	3' UTR	-1.59	-2.4	-0.668	down	1.25941	0.332753	0.817515	0.857167	up	no	5.75788	5.35128	5.82457	6.07108	3.9712	3.40344
chr1	44350356	44350684	329	ENSAPLG00000011479	ENSAPLT00000012025	39698	UHRF1BP1L	GO:0005769(early endosome);GO:0005829(cytosol);GO:0042803(protein homodimerization activity);GO:0062069(GARP complex binding)	NA	NA	NA	UHRF1 binding protein 1 like [Source:HGNC Symbol;Acc:HGNC:29102]	Exon (ENSAPLT00000012025/ENSAPLG00000011479, exon 14 of 21)	-0.527	-0.893	0.98	up	1.07936	0.110181	0.715592	0.771805	up	no	2.12265	1.46156	3.02449	2.49824	2.38362	1.24091
chr1	45852353	45852442	90	ENSAPLG00000002921	ENSAPLT00000003042	14516	LTA4H	GO:0004177(aminopeptidase activity);GO:0004301(epoxide hydrolase activity);GO:0004463(leukotriene-A4 hydrolase activity);GO:0005634(nucleus);GO:0005654(nucleoplasm);GO:0005829(cytosol);GO:0006508(proteolysis);GO:0008237(metallopeptidase activity);GO:0008270(zinc ion binding);GO:0019370(leukotriene biosynthetic process);GO:0043171(peptide catabolic process);GO:0044267(cellular protein metabolic pr…	00590(Arachidonic acid metabolism)	K01254	EC:3.3.2.6	leukotriene A4 hydrolase [Source:HGNC Symbol;Acc:HGNC:6710]	3' UTR	-1.55	-2.33	-1.12	down	2.57683	1.3656	5.63868e-06	1.64091e-05	up	yes	34.6501	28.9611	38.0214	14.3694	11.8852	13.1863
chr1	46409622	46409801	180	ENSAPLG00000015453	ENSAPLT00000016096	135306	TMCC3	NA	NA	NA	NA	transmembrane and coiled-coil domain family 3 [Source:HGNC Symbol;Acc:HGNC:29199]	Exon (ENSAPLT00000016096/ENSAPLG00000015453, exon 4 of 4)	-1.83	-2.7	-2.03	down	0.205569	-2.28231	4.76925e-08	1.75992e-07	down	yes	0.649582	0.910501	1.9061	5.26328	6.71692	4.88122
chr1	46431897	46435227	3331	ENSAPLG00000015313	ENSAPLT00000015963	11355	CEP83	GO:0005794(Golgi apparatus);GO:0005814(centriole);GO:0048278(vesicle docking);GO:0051660(establishment of centrosome localization);GO:0060271(cilium assembly);GO:0071539(protein localization to centrosome);GO:0097539(ciliary transition fiber)	NA	NA	NA	centrosomal protein 83 [Source:HGNC Symbol;Acc:HGNC:17966]	Exon (ENSAPLT00000015963/ENSAPLG00000015313, exon 7 of 13)	-1.02	-1.64	2.03	up	5.02547	2.32926	0.00214747	0.0043155	up	yes	1.99323	1.74989	3.81803	0.941516	0.343717	0.219332
chr1	46737446	46743089	5644	ENSAPLG00000014911	ENSAPLT00000015549	0		GO:0005634(nucleus);GO:0006511(ubiquitin-dependent protein catabolic process);GO:0061631(ubiquitin conjugating enzyme activity);GO:0070534(protein K63-linked ubiquitination)	04120(Ubiquitin mediated proteolysis)	K10580	EC:2.3.2.23		Exon (ENSAPLT00000015549/ENSAPLG00000014911, exon 1 of 4)	-4.36	-5.67	0.306	up	1.8692	0.90242	0.00968995	0.0172736	up	no	94.7925	104.916	115.594	64.5514	51.9852	52.1468
chr1	46934573	46934663	91	ENSAPLG00000014455	ENSAPLT00000015124	62385	EEA1	GO:0003676(nucleic acid binding);GO:0005545(1-phosphatidylinositol binding);GO:0005768(endosome);GO:0005769(early endosome);GO:0005829(cytosol);GO:0005969(serine-pyruvate aminotransferase complex);GO:0006897(endocytosis);GO:0006906(vesicle fusion);GO:0019897(extrinsic component of plasma membrane);GO:0030742(GTP-dependent protein binding);GO:0031410(cytoplasmic vesicle);GO:0039694(viral RNA genom…	04144(Endocytosis);04145(Phagosome)	K12478	NA	early endosome antigen 1 [Source:HGNC Symbol;Acc:HGNC:3185]	Exon (ENSAPLT00000015124/ENSAPLG00000014455, exon 7 of 29)	-0.339	-0.548	-1.12	down	0.893259	-0.16285	0.321124	0.391684	down	no	2.20145	1.47497	2.45723	3.24451	2.33829	1.28379
chr1	47213281	47213610	330	ENSAPLG00000020200	ENSAPLT00000019025	2429	BTG1	GO:0008285(negative regulation of cell population proliferation)	03018(RNA degradation)	K14443	NA	BTG anti-proliferation factor 1 [Source:HGNC Symbol;Acc:HGNC:1130]	3' UTR	-6.59	-8.14	0.345	up	1.61097	0.687926	0.107211	0.150688	up	no	625.171	567.301	575.289	263.335	423.896	410.099
chr1	48367105	48367373	269	ENSAPLG00000024182	ENSAPLT00000023299	3252	DUSP6	GO:0000188(inactivation of MAPK activity);GO:0001933(negative regulation of protein phosphorylation);GO:0004721(phosphoprotein phosphatase activity);GO:0005737(cytoplasm);GO:0006470(protein dephosphorylation);GO:0008138(protein tyrosine/serine/threonine phosphatase activity);GO:0016311(dephosphorylation);GO:0016791(phosphatase activity);GO:0017017(MAP kinase tyrosine/serine/threonine phosphatase …	04010(MAPK signaling pathway)	K21946	EC:3.1.3.16;EC:3.1.3.48	dual specificity phosphatase 6 [Source:HGNC Symbol;Acc:HGNC:3072]	3' UTR	-6.66	-8.21	-1.39	down	0.681932	-0.552301	0.0043989	0.00836439	down	no	9.7382	14.6475	10.7529	20.4048	15.4582	15.665
chr1	48879675	48879765	91	ENSAPLG00000011991	ENSAPLT00000012604	36450	CEP290	GO:0000930(gamma-tubulin complex);GO:0005634(nucleus);GO:0005737(cytoplasm);GO:0005813(centrosome);GO:0005814(centriole);GO:0005829(cytosol);GO:0032991(protein-containing complex);GO:0034451(centriolar satellite);GO:0035869(ciliary transition zone);GO:0042802(identical protein binding);GO:0045893(positive regulation of transcription, DNA-templated);GO:0060271(cilium assembly);GO:0070201(regulatio…	NA	NA	NA	centrosomal protein 290 [Source:HGNC Symbol;Acc:HGNC:29021]	Exon (ENSAPLT00000012604/ENSAPLG00000011991, exon 32 of 45)	-0.4	-0.669	2.74	up	15.7403	3.97639	0.0149867	0.0257039	up	yes	0.204117	0.375128	0.702989	0	0	0.081462
chr1	50212595	50221499	8905	ENSAPLG00000015250	ENSAPLT00000015900	89	SLC6A15	GO:0005298(proline:sodium symporter activity);GO:0005328(neurotransmitter:sodium symporter activity);GO:0005887(integral component of plasma membrane);GO:0015804(neutral amino acid transport);GO:0015820(leucine transport);GO:0015824(proline transport);GO:0016021(integral component of membrane)	NA	NA	NA	solute carrier family 6 member 15 [Source:HGNC Symbol;Acc:HGNC:13621]	5' UTR	-0.332	-0.533	1.85	up	177.774	7.4739	4.02335e-11	2.02442e-10	up	yes	15.4343	8.24288	13.7148	0	0	0.210334
chr1	52127139	52127257	119	ENSAPLG00000009624	ENSAPLT00000010028	0	SLC25A17	GO:0005347(ATP transmembrane transporter activity);GO:0005777(peroxisome);GO:0005778(peroxisomal membrane);GO:0005779(integral component of peroxisomal membrane);GO:0006635(fatty acid beta-oxidation);GO:0015217(ADP transmembrane transporter activity);GO:0015228(coenzyme A transmembrane transporter activity);GO:0015230(FAD transmembrane transporter activity);GO:0015867(ATP transport);GO:0015908(fa…	04146(Peroxisome)	K13354	NA	solute carrier family 25 member 17 [Source:HGNC Symbol;Acc:HGNC:10987]	5' UTR	-0.728	-1.21	1.69	up	13.8106	3.78771	4.28088e-39	1.00684e-37	up	yes	177.113	166.454	129.739	13.5762	12.0941	8.60074
chr1	53036475	53036743	269	ENSAPLG00000023146	ENSAPLT00000030563	11032	CBX7	GO:0000122(negative regulation of transcription by RNA polymerase II);GO:0000790(nuclear chromatin);GO:0005634(nucleus);GO:0005654(nucleoplasm);GO:0005829(cytosol);GO:0031519(PcG protein complex);GO:0031519(PcG protein complex)	NA	NA	NA	chromobox 7 [Source:HGNC Symbol;Acc:HGNC:1557]	3' UTR	-1.77	-2.62	-0.752	down	0.147004	-2.76607	2.12726e-20	2.05655e-19	down	yes	2.69846	3.39979	2.31395	17.0002	17.4731	22.7511
chr1	53109619	53110711	1093	ENSAPLG00000014238	ENSAPLT00000014837	4878	JOSD1	GO:0004843(thiol-dependent ubiquitin-specific protease activity);GO:0016579(protein deubiquitination)	NA	NA	NA	Josephin domain containing 1 [Source:HGNC Symbol;Acc:HGNC:28953]	3' UTR	-9.71	-11.5	-0.522	down	1.64659	0.719483	0.0385242	0.0604778	up	no	96.1794	75.9599	88.4193	60.1135	48.7345	49.3932
chr1	53523379	53524707	1329	ENSAPLG00000016022	ENSAPLT00000016733	9743	CARD10	GO:0005515(protein binding);GO:0007250(activation of NF-kappaB-inducing kinase activity);GO:0042981(regulation of apoptotic process);GO:0090051(negative regulation of cell migration involved in sprouting angiogenesis);GO:1900182(positive regulation of protein localization to nucleus)	04064(NF-kappa B signaling pathway)	K20912	NA	caspase recruitment domain family member 10 [Source:HGNC Symbol;Acc:HGNC:16422]	Exon (ENSAPLT00000016733/ENSAPLG00000016022, exon 5 of 22)	-0.504	-0.853	-1.04	down	16.3479	4.03103	2.22494e-18	1.90802e-17	up	yes	13.4745	10.1656	12.7495	0.507855	0.549007	1.16909
chr1	55538233	55541295	3063	ENSAPLG00000009846	ENSAPLT00000010268	1851	PRDM4	GO:0000978(RNA polymerase II proximal promoter sequence-specific DNA binding);GO:0001228(DNA-binding transcription activator activity, RNA polymerase II-specific);GO:0003676(nucleic acid binding);GO:0005515(protein binding);GO:0005634(nucleus);GO:0005737(cytoplasm);GO:0006366(transcription by RNA polymerase II);GO:0035097(histone methyltransferase complex);GO:0045944(positive regulation of transc…	04722(Neurotrophin signaling pathway)	K12463	NA	PR/SET domain 4 [Source:HGNC Symbol;Acc:HGNC:9348]	Exon (ENSAPLT00000010268/ENSAPLG00000009846, exon 3 of 11)	-2.98	-4.07	-0.4	down	1.28818	0.365337	0.660326	0.722079	up	no	19.5157	19.8693	19.0584	14.5617	16.033	14.7742
chr1	55847718	55848076	359	ENSAPLG00000001889	ENSAPLT00000001882	358	MTERF2	GO:0003677(DNA binding);GO:0003690(double-stranded DNA binding);GO:0005739(mitochondrion);GO:0006355(regulation of transcription, DNA-templated);GO:0042645(mitochondrial nucleoid)	NA	NA	NA	mitochondrial transcription termination factor 2 [Source:HGNC Symbol;Acc:HGNC:30779]	Exon (ENSAPLT00000001882/ENSAPLG00000001889, exon 1 of 1)	-1.41	-2.16	0.757	up	0.613417	-0.70506	0.0293487	0.0472076	down	no	4.09066	3.25193	4.61169	6.64079	4.5731	8.27412
chr1	56493495	56494261	767	ENSAPLG00000015124	ENSAPLT00000015786	29924	APPL2	GO:0001726(ruffle);GO:0001786(phosphatidylserine binding);GO:0002024(diet induced thermogenesis);GO:0005515(protein binding);GO:0005634(nucleus);GO:0005737(cytoplasm);GO:0005768(endosome);GO:0005886(plasma membrane);GO:0006606(protein import into nucleus);GO:0007179(transforming growth factor beta receptor signaling pathway);GO:0008283(cell population proliferation);GO:0009631(cold acclimation);G…	NA	NA	NA	adaptor protein, phosphotyrosine interacting with PH domain and leucine zipper 2 [Source:HGNC Symbol;Acc:HGNC:18242]	Exon (ENSAPLT00000015786/ENSAPLG00000015124, exon 11 of 21)	-4.26	-5.55	-0.937	down	0.896522	-0.157589	0.137761	0.187377	down	no	5.65192	6.78616	10.238	8.18323	8.85574	8.25444
chr1	57075943	57076213	271	ENSAPLG00000013737	ENSAPLT00000045326	24001	NT5DC3	GO:0043235(receptor complex)	00230(Purine metabolism);00240(Pyrimidine metabolism);00760(Nicotinate and nicotinamide metabolism)	K01081	EC:3.1.3.5	5'-nucleotidase domain containing 3 [Source:HGNC Symbol;Acc:HGNC:30826]	3' UTR	-0.841	-1.38	0.779	up	0.0503539	-4.31175	7.60817e-53	2.95317e-51	down	yes	1.30675	1.22188	2.2416	26.2959	36.3229	32.1154
chr1	57752448	57752537	90	ENSAPLG00000013225	ENSAPLT00000034641	0	NUP37	GO:0000776(kinetochore);GO:0005515(protein binding);GO:0005654(nucleoplasm);GO:0031080(nuclear pore outer ring)	03013(RNA transport)	K14302	NA	nucleoporin 37 [Source:HGNC Symbol;Acc:HGNC:29929]	Exon (ENSAPLT00000034641/ENSAPLG00000013225, exon 1 of 7)	-0.368	-0.607	-0.666	down	4.14638	2.05185	7.93022e-05	0.00019931	up	yes	19.374	21.0132	17.9894	2.31771	6.48508	5.27615
chr1	57862629	57863767	1139	ENSAPLG00000016228	ENSAPLT00000018690	0	GNPTAB	GO:0000139(Golgi membrane);GO:0003976(UDP-N-acetylglucosamine-lysosomal-enzyme N-acetylglucosaminephosphotransferase activity);GO:0005509(calcium ion binding);GO:0005794(Golgi apparatus);GO:0007040(lysosome organization);GO:0009306(protein secretion);GO:0016256(N-glycan processing to lysosome);GO:0016772(transferase activity, transferring phosphorus-containing groups);GO:0033299(secretion of lyso…	04142(Lysosome);04142(Lysosome)	K08239	EC:2.7.8.17	N-acetylglucosamine-1-phosphate transferase subunits alpha and beta [Source:HGNC Symbol;Acc:HGNC:29670]	5' UTR	-0.807	-1.33	1.57	up	0.14797	-2.75662	1.69884e-12	9.61125e-12	down	yes	0.917239	0.738211	2.03437	9.09885	11.8184	4.01898
chr1	57908602	57908900	299	ENSAPLG00000001471	ENSAPLT00000001551	9236		NA	03440(Homologous recombination)	K19528	NA		3' UTR	-1.67	-2.5	-1.33	down	0.119518	-3.06471	5.10298e-11	2.53431e-10	down	yes	0.651278	0.362565	1.06856	9.01922	4.97128	3.43289
chr1	58402371	58402639	269	ENSAPLG00000006030	ENSAPLT00000006299	14928	HIPK2	GO:0000122(negative regulation of transcription by RNA polymerase II);GO:0001102(RNA polymerase II activating transcription factor binding);GO:0001934(positive regulation of protein phosphorylation);GO:0003713(transcription coactivator activity);GO:0003714(transcription corepressor activity);GO:0004672(protein kinase activity);GO:0004674(protein serine/threonine kinase activity);GO:0005524(ATP bi…	04218(Cellular senescence)	K08826	EC:2.7.11.1	homeodomain interacting protein kinase 2 [Source:HGNC Symbol;Acc:HGNC:14402]	Exon (ENSAPLT00000006299/ENSAPLG00000006030, exon 2 of 15)	-19.6	-21.9	0.474	up	0.732014	-0.450056	0.00472363	0.00893251	down	no	141.834	129.089	131.688	151.926	166.126	231.952
chr1	58480713	58482052	1340	ENSAPLG00000006030	ENSAPLT00000006299	93270	HIPK2	GO:0000122(negative regulation of transcription by RNA polymerase II);GO:0001102(RNA polymerase II activating transcription factor binding);GO:0001934(positive regulation of protein phosphorylation);GO:0003713(transcription coactivator activity);GO:0003714(transcription corepressor activity);GO:0004672(protein kinase activity);GO:0004674(protein serine/threonine kinase activity);GO:0005524(ATP bi…	04218(Cellular senescence)	K08826	EC:2.7.11.1	homeodomain interacting protein kinase 2 [Source:HGNC Symbol;Acc:HGNC:14402]	Exon (ENSAPLT00000006299/ENSAPLG00000006030, exon 13 of 15)	-9.67	-11.5	0.399	up	0.732014	-0.450056	0.00472363	0.00893251	down	no	141.834	129.089	131.688	151.926	166.126	231.952
chr1	58578990	58579169	180	ENSAPLG00000005594	ENSAPLT00000021784	65013	KIAA1549	NA	NA	NA	NA	KIAA1549 [Source:HGNC Symbol;Acc:HGNC:22219]	Exon (ENSAPLT00000021784/ENSAPLG00000005594, exon 2 of 20)	-1.02	-1.63	0.797	up	0.968666	-0.0459287	0.204007	0.26452	down	no	10.9549	10.1416	13.7467	13.576	14.0381	8.35627
chr1	58579857	58579916	60	ENSAPLG00000005594	ENSAPLT00000021784	65880	KIAA1549	NA	NA	NA	NA	KIAA1549 [Source:HGNC Symbol;Acc:HGNC:22219]	Exon (ENSAPLT00000021784/ENSAPLG00000005594, exon 2 of 20)	-0.918	-1.49	-0.943	down	0.968666	-0.0459287	0.204007	0.26452	down	no	10.9549	10.1416	13.7467	13.576	14.0381	8.35627
chr1	59730729	59741670	10942	ENSAPLG00000012813	ENSAPLT00000013365	57679	CREB3L2	GO:0003700(DNA-binding transcription factor activity);GO:0005634(nucleus);GO:0005654(nucleoplasm);GO:0005783(endoplasmic reticulum);GO:0006355(regulation of transcription, DNA-templated);GO:0030968(endoplasmic reticulum unfolded protein response);GO:0034976(response to endoplasmic reticulum stress);GO:0035497(cAMP response element binding);GO:0044212(transcription regulatory region DNA binding);G…	04916(Melanogenesis);04261(Adrenergic signaling in cardiomyocytes)	K09048	NA	cAMP responsive element binding protein 3 like 2 [Source:HGNC Symbol;Acc:HGNC:23720]	Exon (ENSAPLT00000013365/ENSAPLG00000012813, exon 5 of 12)	-3.71	-4.92	0.669	up	1.44553	0.531601	0.324694	0.395338	up	no	12.4749	13.4195	13.6155	10.3611	7.9998	8.97148
chr1	60605117	60605413	297	ENSAPLG00000031045	ENSAPLT00000034175	39246	MTPN	GO:0005515(protein binding)	NA	NA	NA	myotrophin [Source:HGNC Symbol;Acc:HGNC:15667]	3' UTR	-4.25	-5.55	-0.829	down	0.527254	-0.923431	0.000112089	0.00027529	down	no	7.32387	5.6105	8.84413	18.9579	12.0768	10.2708
chr1	61979675	61979795	121	ENSAPLG00000006605	ENSAPLT00000006931	53770	DENND5B	GO:0005515(protein binding)	NA	NA	NA	DENN domain containing 5B [Source:HGNC Symbol;Acc:HGNC:28338]	Exon (ENSAPLT00000006931/ENSAPLG00000006605, exon 20 of 20)	-0.446	-0.752	-1.42	down	3.09064	1.62791	0.00874936	0.0157574	up	yes	2.8561	3.38248	2.49661	0.858841	1.60136	0.366133
chr1	61998921	61999041	121	ENSAPLG00000023163	ENSAPLT00000030177	210		NA	NA	NA	NA		Exon (ENSAPLT00000030177/ENSAPLG00000023163, exon 1 of 1)	-0.681	-1.15	-2.6	down	11.8564	3.56759	1	1	up	no	0.229574	0.152396	0.185748	0.047883	0	0
chr1	62567401	62568296	896	ENSAPLG00000015024	ENSAPLT00000015655	33607	IQSEC3	GO:0005086(ARF guanyl-nucleotide exchange factor activity);GO:0005515(protein binding);GO:0032012(regulation of ARF protein signal transduction)	04144(Endocytosis)	K12495	NA	IQ motif and Sec7 domain 3 [Source:HGNC Symbol;Acc:HGNC:29193]	3' UTR	-1.63	-2.44	-0.4	down	11.6158	3.53802	9.09803e-27	1.24256e-25	up	yes	25.4919	27.489	29.4308	1.62242	2.63266	2.83968
chr1	63123826	63125008	1183	ENSAPLG00000006100	ENSAPLT00000006374	106590	ERC1	GO:0005813(centrosome);GO:0007252(I-kappaB phosphorylation);GO:0008385(IkappaB kinase complex);GO:0036064(ciliary basal body);GO:0036064(ciliary basal body)	NA	NA	NA	ELKS/RAB6-interacting/CAST family member 1 [Source:HGNC Symbol;Acc:HGNC:17072]	Exon (ENSAPLT00000006374/ENSAPLG00000006100, exon 9 of 14)	-0.43	-0.723	-1.58	down	0.500356	-0.998974	0.0192939	0.0324287	down	no	0.942999	0.991538	1.73068	2.8912	3.22995	1.20407
chr1	63446596	63446833	238	ENSAPLG00000005683	ENSAPLT00000021987	32720	ADIPOR2	GO:0005886(plasma membrane);GO:0016021(integral component of membrane);GO:0031226(intrinsic component of plasma membrane);GO:0033211(adiponectin-activated signaling pathway);GO:0038023(signaling receptor activity);GO:0042593(glucose homeostasis);GO:0042802(identical protein binding);GO:0046982(protein heterodimerization activity);GO:0055100(adiponectin binding);GO:0061042(vascular wound healing);…	04920(Adipocytokine signaling pathway);04920(Adipocytokine signaling pathway)	K07297	NA	adiponectin receptor 2 [Source:HGNC Symbol;Acc:HGNC:24041]	3' UTR	-11.4	-13.3	0.462	up	0.508861	-0.974658	1.88064e-08	7.27525e-08	down	no	82.9573	67.6365	79.5538	169.865	152.987	129.428
chr1	63486270	63492194	5925	ENSAPLG00000005674	ENSAPLT00000005857	1601	LRTM2	GO:0005515(protein binding);GO:0051965(positive regulation of synapse assembly)	04010(MAPK signaling pathway);04921(Oxytocin signaling pathway);04260(Cardiac muscle contraction);04261(Adrenergic signaling in cardiomyocytes);05410(Hypertrophic cardiomyopathy (HCM));05412(Arrhythmogenic right ventricular cardiomyopathy (ARVC));05414(Dilated cardiomyopathy (DCM))	K04861	NA	leucine rich repeats and transmembrane domains 2 [Source:HGNC Symbol;Acc:HGNC:32443]	Exon (ENSAPLT00000005857/ENSAPLG00000005674, exon 2 of 4)	-0.676	-1.14	-1.32	down	16.5609	4.04971	0.00603434	0.0112119	up	yes	1.95638	1.93543	0.618089	0	0.272322	0
chr1	64515270	64516041	772	ENSAPLG00000024303	ENSAPLT00000031290	3772	PEX26	GO:0005777(peroxisome);GO:0005779(integral component of peroxisomal membrane);GO:0008022(protein C-terminus binding);GO:0016558(protein import into peroxisome matrix);GO:0044877(protein-containing complex binding);GO:0045046(protein import into peroxisome membrane);GO:0051117(ATPase binding)	04146(Peroxisome)	K13340	NA	peroxisomal biogenesis factor 26 [Source:HGNC Symbol;Acc:HGNC:22965]	3' UTR	-4.53	-5.86	-0.324	down	2.34822	1.23157	0.000420563	0.000945215	up	yes	45.0175	46.2625	35.0354	21.708	13.5102	18.5737
chr1	64536411	64536799	389	ENSAPLG00000007864	ENSAPLT00000008178	5072		GO:0003924(GTPase activity);GO:0005200(structural constituent of cytoskeleton);GO:0005525(GTP binding);GO:0005874(microtubule);GO:0007017(microtubule-based process)	04145(Phagosome);04210(Apoptosis);04530(Tight junction);04540(Gap junction)	K07374	NA		Exon (ENSAPLT00000008178/ENSAPLG00000007864, exon 4 of 5)	-0.854	-1.4	-3.08	down	0.00370598	-8.07593	3.06672e-35	6.1603e-34	down	yes	0	0	0.233619	24.1432	17.277	21.6183
chr1	72975781	72979227	3447	ENSAPLG00000008917	ENSAPLT00000039165	2092	MCAT	GO:0004312(fatty acid synthase activity);GO:0004314([acyl-carrier-protein] S-malonyltransferase activity);GO:0005739(mitochondrion);GO:0006633(fatty acid biosynthetic process);GO:0016740(transferase activity)	00061(Fatty acid biosynthesis);00333(Prodigiosin biosyntheses)	K00645	EC:2.3.1.39	malonyl-CoA-acyl carrier protein transacylase [Source:HGNC Symbol;Acc:HGNC:29622]	Exon (ENSAPLT00000039165/ENSAPLG00000008917, exon 5 of 6)	-0.964	-1.55	0.198	up	1.06446	0.090124	0.500174	0.571462	up	no	29.8395	26.5775	29.368	29.2295	27.8356	23.5249
chr1	73160304	73160801	498	ENSAPLG00000001237	ENSAPLT00000001227	439	A4GALT	GO:0001576(globoside biosynthetic process);GO:0007009(plasma membrane organization);GO:0008378(galactosyltransferase activity);GO:0015643(toxic substance binding);GO:0016020(membrane);GO:0050512(lactosylceramide 4-alpha-galactosyltransferase activity)	00601(Glycosphingolipid biosynthesis - lacto and neolacto series);00603(Glycosphingolipid biosynthesis - globo and isoglobo series)	K01988	EC:2.4.1.228	alpha 1,4-galactosyltransferase (P blood group) [Source:HGNC Symbol;Acc:HGNC:18149]	Exon (ENSAPLT00000001227/ENSAPLG00000001237, exon 1 of 1)	-2.48	-3.49	-1.17	down	0.459735	-1.12113	0.00855528	0.0154429	down	yes	1.85689	2.27216	2.60409	5.9479	4.60807	4.08974
chr1	73981957	73984029	2073	ENSAPLG00000023232	ENSAPLT00000033986	89	BHLHE41	GO:0000122(negative regulation of transcription by RNA polymerase II);GO:0000978(RNA polymerase II proximal promoter sequence-specific DNA binding);GO:0000980(RNA polymerase II distal enhancer sequence-specific DNA binding);GO:0000981(DNA-binding transcription factor activity, RNA polymerase II-specific);GO:0001102(RNA polymerase II activating transcription factor binding);GO:0001227(DNA-binding …	NA	NA	NA	basic helix-loop-helix family member e41 [Source:HGNC Symbol;Acc:HGNC:16617]	5' UTR	-4	-5.25	-0.414	down	4.70071	2.23288	3.76769e-12	2.07364e-11	up	yes	36.7441	28.6645	35.4535	6.18145	7.51102	7.76432
chr1	74422336	74426031	3696	ENSAPLG00000015977	ENSAPLT00000016677	8704	CASC1	NA	NA	NA	NA	cancer susceptibility 1 [Source:HGNC Symbol;Acc:HGNC:29599]	Exon (ENSAPLT00000016677/ENSAPLG00000015977, exon 7 of 13)	-0.467	-0.788	2.74	up	3.37205	1.75363	1	1	up	no	0.078558	0	0.472138	0.163312	0	0
chr1	76565982	76567310	1329	ENSAPLG00000002594	ENSAPLT00000018325	13807		GO:0005085(guanyl-nucleotide exchange factor activity);GO:0005089(Rho guanyl-nucleotide exchange factor activity);GO:0005515(protein binding);GO:0035023(regulation of Rho protein signal transduction);GO:0035556(intracellular signal transduction)	NA	NA	NA		Exon (ENSAPLT00000018325/ENSAPLG00000002594, exon 2 of 16)	-0.634	-1.07	2.82	up	264.626	8.04781	5.18562e-37	1.1465e-35	up	yes	8.83074	8.7117	11.3201	0	0.0904327	0.0186364
chr1	76568030	76571252	3223	ENSAPLG00000002594	ENSAPLT00000018325	15855		GO:0005085(guanyl-nucleotide exchange factor activity);GO:0005089(Rho guanyl-nucleotide exchange factor activity);GO:0005515(protein binding);GO:0035023(regulation of Rho protein signal transduction);GO:0035556(intracellular signal transduction)	NA	NA	NA		Exon (ENSAPLT00000018325/ENSAPLG00000002594, exon 3 of 16)	-1.18	-1.85	-1.08	down	264.626	8.04781	5.18562e-37	1.1465e-35	up	yes	8.83074	8.7117	11.3201	0	0.0904327	0.0186364
chr1	76580630	76580780	151	ENSAPLG00000002594	ENSAPLT00000018325	28455		GO:0005085(guanyl-nucleotide exchange factor activity);GO:0005089(Rho guanyl-nucleotide exchange factor activity);GO:0005515(protein binding);GO:0035023(regulation of Rho protein signal transduction);GO:0035556(intracellular signal transduction)	NA	NA	NA		Exon (ENSAPLT00000018325/ENSAPLG00000002594, exon 16 of 16)	-0.378	-0.624	1.91	up	264.626	8.04781	5.18562e-37	1.1465e-35	up	yes	8.83074	8.7117	11.3201	0	0.0904327	0.0186364
chr1	76752887	76753126	240	ENSAPLG00000002805	ENSAPLT00000002949	76936	VWF	GO:0002020(protease binding);GO:0005178(integrin binding);GO:0005515(protein binding);GO:0005518(collagen binding);GO:0005576(extracellular region);GO:0005783(endoplasmic reticulum);GO:0007155(cell adhesion);GO:0007596(blood coagulation);GO:0007599(hemostasis);GO:0019865(immunoglobulin binding);GO:0030168(platelet activation);GO:0031589(cell-substrate adhesion);GO:0033093(Weibel-Palade body);GO:0…	04512(ECM-receptor interaction);04510(Focal adhesion)	K03900	NA	von Willebrand factor [Source:HGNC Symbol;Acc:HGNC:12726]	Exon (ENSAPLT00000002949/ENSAPLG00000002805, exon 27 of 51)	-0.492	-0.831	-0.946	down	0.0276537	-5.17639	6.04486e-87	7.01271e-85	down	yes	1.25676	1.20065	1.74507	62.1912	49.6421	40.1352
chr1	77885648	77887386	1739	ENSAPLG00000003009	ENSAPLT00000031527	1272		GO:0005634(nucleus);GO:0005737(cytoplasm);GO:0007616(long-term memory);GO:0008344(adult locomotory behavior);GO:0051726(regulation of cell cycle);GO:0071481(cellular response to X-ray);GO:0097129(cyclin D2-CDK4 complex);GO:0097129(cyclin D2-CDK4 complex)	04310(Wnt signaling pathway);04340(Hedgehog signaling pathway);04068(FoxO signaling pathway);04110(Cell cycle);04115(p53 signaling pathway);04218(Cellular senescence);04510(Focal adhesion);04510(Focal adhesion)	K10151	NA		Exon (ENSAPLT00000031527/ENSAPLG00000003009, exon 2 of 6)	-4.31	-5.61	0.85	up	0.522393	-0.936793	0.000501499	0.00111259	down	no	6.5353	8.54336	8.8181	19.9629	11.2545	14.5275
chr1	78096115	78096294	180	ENSAPLG00000003105	ENSAPLT00000003149	41299	DYRK4	GO:0004672(protein kinase activity);GO:0005524(ATP binding);GO:0006468(protein phosphorylation);GO:0043231(intracellular membrane-bounded organelle)	NA	NA	NA	dual specificity tyrosine phosphorylation regulated kinase 4 [Source:HGNC Symbol;Acc:HGNC:3095]	Exon (ENSAPLT00000003149/ENSAPLG00000003105, exon 14 of 14)	-0.499	-0.844	3.09	up	inf	inf	1	1	up	no	0	0.117192	0.817054	0	0	0
chr1	79239969	79243056	3088	ENSAPLG00000005334	ENSAPLT00000005501	8613	FBXO40	GO:0005515(protein binding);GO:0008270(zinc ion binding);GO:0061630(ubiquitin protein ligase activity)	NA	NA	NA	F-box protein 40 [Source:HGNC Symbol;Acc:HGNC:29816]	Exon (ENSAPLT00000005501/ENSAPLG00000005334, exon 2 of 3)	-0.466	-0.785	-1.81	down	0.00343232	-8.1866	1.16091e-45	3.44435e-44	down	yes	0	0.094399	0.033791	8.91111	16.8901	11.5468
chr1	79497843	79498641	799	ENSAPLG00000001230	ENSAPLT00000001325	0	COPS7A	GO:0008180(COP9 signalosome);GO:0010387(COP9 signalosome assembly);GO:0010387(COP9 signalosome assembly)	NA	NA	NA	COP9 signalosome subunit 7A [Source:HGNC Symbol;Acc:HGNC:16758]	5' UTR	-8.92	-10.7	-0.453	down	1.2508	0.322855	0.776964	0.824645	up	no	79.215	75.7846	67.5301	59.5073	57.6398	60.7624
chr1	79607629	79607868	240	ENSAPLG00000003443	ENSAPLT00000018612	11592	USP5	GO:0004843(thiol-dependent ubiquitin-specific protease activity);GO:0005515(protein binding);GO:0006511(ubiquitin-dependent protein catabolic process);GO:0008270(zinc ion binding);GO:0016579(protein deubiquitination);GO:0032436(positive regulation of proteasomal ubiquitin-dependent protein catabolic process);GO:0036459(thiol-dependent ubiquitinyl hydrolase activity);GO:0043130(ubiquitin binding);…	NA	NA	NA	ubiquitin specific peptidase 5 [Source:HGNC Symbol;Acc:HGNC:12628]	3' UTR	-8.3	-9.99	-0.522	down	2.87865	1.52539	1.60473e-07	5.57123e-07	up	yes	289.019	282.752	240.661	90.6111	87.6683	103.947
chr1	79655747	79656555	809	ENSAPLG00000021772	ENSAPLT00000020777	2550	ATN1	GO:0000122(negative regulation of transcription by RNA polymerase II);GO:0003714(transcription corepressor activity);GO:0005634(nucleus);GO:0005654(nucleoplasm);GO:0016363(nuclear matrix);GO:0019904(protein domain specific binding);GO:0051402(neuron apoptotic process)	NA	NA	NA	atrophin 1 [Source:HGNC Symbol;Acc:HGNC:3033]	Exon (ENSAPLT00000020777/ENSAPLG00000021772, exon 4 of 9)	-8.72	-10.5	-0.635	down	8.87421	3.14962	5.88508e-30	9.17877e-29	up	yes	114.136	114.699	115.498	10.8791	13.1148	14.8078
chr1	79656944	79657827	884	ENSAPLG00000021772	ENSAPLT00000020777	3747	ATN1	GO:0000122(negative regulation of transcription by RNA polymerase II);GO:0003714(transcription corepressor activity);GO:0005634(nucleus);GO:0005654(nucleoplasm);GO:0016363(nuclear matrix);GO:0019904(protein domain specific binding);GO:0051402(neuron apoptotic process)	NA	NA	NA	atrophin 1 [Source:HGNC Symbol;Acc:HGNC:3033]	Exon (ENSAPLT00000020777/ENSAPLG00000021772, exon 4 of 9)	-11.6	-13.5	-0.799	down	8.87421	3.14962	5.88508e-30	9.17877e-29	up	yes	114.136	114.699	115.498	10.8791	13.1148	14.8078
chr1	79659204	79660756	1553	ENSAPLG00000021772	ENSAPLT00000020777	6007	ATN1	GO:0000122(negative regulation of transcription by RNA polymerase II);GO:0003714(transcription corepressor activity);GO:0005634(nucleus);GO:0005654(nucleoplasm);GO:0016363(nuclear matrix);GO:0019904(protein domain specific binding);GO:0051402(neuron apoptotic process)	NA	NA	NA	atrophin 1 [Source:HGNC Symbol;Acc:HGNC:3033]	3' UTR	-19.4	-21.7	-0.696	down	8.87421	3.14962	5.88508e-30	9.17877e-29	up	yes	114.136	114.699	115.498	10.8791	13.1148	14.8078
chr1	79705449	79705509	61	ENSAPLG00000005501	ENSAPLT00000005757	298	C1S	GO:0004252(serine-type endopeptidase activity);GO:0005509(calcium ion binding);GO:0006508(proteolysis);GO:0006958(complement activation, classical pathway);GO:0042802(identical protein binding)	NA	NA	NA	complement C1s [Source:HGNC Symbol;Acc:HGNC:1247]	5' UTR	-0.336	-0.543	-1.81	down	0.253958	-1.97734	0.00479433	0.00905791	down	yes	1.78704	1.21222	0.324321	8.30587	0.597516	4.18374
chr1	79743132	79743282	151	ENSAPLG00000007312	ENSAPLT00000007632	23215	CLSTN3	GO:0001558(regulation of cell growth);GO:0005509(calcium ion binding);GO:0007156(homophilic cell adhesion via plasma membrane adhesion molecules);GO:0007416(synapse assembly);GO:0009986(cell surface);GO:0014069(postsynaptic density);GO:0016020(membrane);GO:0032991(protein-containing complex);GO:0035249(synaptic transmission, glutamatergic);GO:0045211(postsynaptic membrane);GO:0050806(positive reg…	NA	NA	NA	calsyntenin 3 [Source:HGNC Symbol;Acc:HGNC:18371]	Exon (ENSAPLT00000007632/ENSAPLG00000007312, exon 17 of 17)	-1.5	-2.28	-1.35	down	25.0732	4.64808	6.07279e-36	1.26926e-34	up	yes	20.6923	20.8812	22.3056	1.13943	0.488056	0.920214
chr1	80403805	80404479	675	ENSAPLG00000026268	ENSAPLT00000020524	0		NA	NA	NA	NA		Exon (ENSAPLT00000042269/ENSAPLG00000026268, exon 1 of 2)	-0.352	-0.574	-1.64	down	inf	inf	4.49036e-13	2.67839e-12	up	yes	1.47042	1.7246	1.51336	0	0	0
chr1	82303158	82304086	929	ENSAPLG00000015642	ENSAPLT00000020132	7482		GO:0090307(mitotic spindle assembly)	NA	NA	NA		Exon (ENSAPLT00000020132/ENSAPLG00000015642, exon 8 of 17)	-1.04	-1.67	2.2	up	1.2827	0.359189	0.847029	0.881542	up	no	1.27641	1.41408	2.5956	1.9862	1.3909	0.743946
chr1	83723216	83723366	151	ENSAPLG00000009089	ENSAPLT00000045846	14126	ARHGAP31	GO:0007165(signal transduction);GO:0007165(signal transduction)	NA	NA	NA	Rho GTPase activating protein 31 [Source:HGNC Symbol;Acc:HGNC:29216]	3' UTR	-3.84	-5.07	0.984	up	0.719305	-0.475325	0.000653101	0.00141934	down	no	24.6811	26.0331	27.877	42.2845	35.6939	31.2816
chr1	85821959	85822198	240	ENSAPLG00000002289	ENSAPLT00000002391	8953	DRD3	GO:0001591(dopamine neurotransmitter receptor activity, coupled via Gi/Go);GO:0001975(response to amphetamine);GO:0002016(regulation of blood volume by renin-angiotensin);GO:0002031(G protein-coupled receptor internalization);GO:0004930(G protein-coupled receptor activity);GO:0004952(dopamine neurotransmitter receptor activity);GO:0005886(plasma membrane);GO:0005887(integral component of plasma m…	04080(Neuroactive ligand-receptor interaction);04080(Neuroactive ligand-receptor interaction)	K04146	NA	dopamine receptor D3 [Source:HGNC Symbol;Acc:HGNC:3024]	Exon (ENSAPLT00000002391/ENSAPLG00000002289, exon 5 of 6)	-0.778	-1.29	-2.68	down	143.634	7.16626	3.32112e-13	2.00295e-12	up	yes	7.39135	7.71459	9.3051	0	0.169952	0
chr1	86215018	86215135	118	ENSAPLG00000028247	ENSAPLT00000027957	4130		GO:0038023(signaling receptor activity);GO:0150077(regulation of neuroinflammatory response);GO:0150077(regulation of neuroinflammatory response)	05167(Kaposi sarcoma-associated herpesvirus infection);05167(Kaposi sarcoma-associated herpesvirus infection)	K21668	NA		Exon (ENSAPLT00000027957/ENSAPLG00000028247, exon 2 of 4)	-0.289	-0.436	-1.58	down	inf	inf	1	1	up	no	0.401531	0.373438	0.476708	0	0	0
chr1	86307570	86309863	2294	ENSAPLG00000026691	ENSAPLT00000018321	16875		NA	NA	NA	NA		Exon (ENSAPLT00000018321/ENSAPLG00000026691, exon 7 of 8)	-0.967	-1.56	-0.804	down	2.91885	1.5454	2.91789e-08	1.10397e-07	up	yes	56.0061	56.8258	83.6714	21.462	25.8433	20.017
chr1	87549313	87561757	12445	ENSAPLG00000010761	ENSAPLT00000028693	18851	FILIP1L	NA	NA	NA	NA	filamin A interacting protein 1 like [Source:HGNC Symbol;Acc:HGNC:24589]	3' UTR	-15.4	-17.5	0.683	up	0.2412	-2.0517	1.3604e-18	1.18233e-17	down	yes	5.19034	6.74677	7.82329	28.6772	33.7362	19.5122
chr1	87712359	87714440	2082	ENSAPLG00000012259	ENSAPLT00000028115	0	TFG	GO:0005515(protein binding);GO:0006888(endoplasmic reticulum to Golgi vesicle-mediated transport);GO:0042802(identical protein binding);GO:0048208(COPII vesicle coating);GO:0070971(endoplasmic reticulum exit site);GO:0070971(endoplasmic reticulum exit site)	05200(Pathways in cancer);05216(Thyroid cancer);05216(Thyroid cancer)	K09292	NA	TRK-fused gene [Source:HGNC Symbol;Acc:HGNC:11758]	5' UTR	-1.72	-2.56	0.869	up	2.05676	1.04037	0.00079437	0.00170766	up	yes	281.317	278.877	265.705	122.536	131.075	147.944
chr1	88153696	88155862	2167	ENSAPLG00000004092	ENSAPLT00000004200	5222	CEP97	GO:0005515(protein binding);GO:0005813(centrosome);GO:0005815(microtubule organizing center);GO:0005829(cytosol);GO:0032991(protein-containing complex);GO:1901673(regulation of mitotic spindle assembly);GO:1902018(negative regulation of cilium assembly)	NA	NA	NA	centrosomal protein 97 [Source:HGNC Symbol;Acc:HGNC:26244]	Exon (ENSAPLT00000004200/ENSAPLG00000004092, exon 6 of 10)	-3.25	-4.4	-1.34	down	1.42316	0.509099	0.477689	0.549971	up	no	4.78661	4.7262	5.73082	3.81312	3.55308	3.34491
chr1	88181758	88181906	149	ENSAPLG00000004114	ENSAPLT00000004215	8355	NXPE3	NA	04068(FoxO signaling pathway)	K15010	NA	neurexophilin and PC-esterase domain family member 3 [Source:HGNC Symbol;Acc:HGNC:28238]	Exon (ENSAPLT00000004215/ENSAPLG00000004114, exon 2 of 5)	-0.473	-0.797	-1.17	down	1.88953	0.918029	0.0659972	0.0979307	up	no	6.19829	7.26585	7.10709	3.6086	4.09136	3.18698
chr1	88189061	88189564	504	ENSAPLG00000004114	ENSAPLT00000004215	15658	NXPE3	NA	04068(FoxO signaling pathway)	K15010	NA	neurexophilin and PC-esterase domain family member 3 [Source:HGNC Symbol;Acc:HGNC:28238]	Exon (ENSAPLT00000004215/ENSAPLG00000004114, exon 5 of 5)	-1.56	-2.36	-0.583	down	1.88953	0.918029	0.0659972	0.0979307	up	no	6.19829	7.26585	7.10709	3.6086	4.09136	3.18698
chr1	88210377	88210940	564	ENSAPLG00000004175	ENSAPLT00000004301	2093	NFKBIZ	GO:0005515(protein binding);GO:0005634(nucleus);GO:0006954(inflammatory response);GO:0016607(nuclear speck);GO:0036464(cytoplasmic ribonucleoprotein granule);GO:0050729(positive regulation of inflammatory response);GO:0050852(T cell receptor signaling pathway);GO:2000321(positive regulation of T-helper 17 cell differentiation)	NA	NA	NA	NFKB inhibitor zeta [Source:HGNC Symbol;Acc:HGNC:29805]	Exon (ENSAPLT00000004301/ENSAPLG00000004175, exon 5 of 12)	-4.27	-5.57	-0.596	down	11.9843	3.58307	8.54773e-36	1.76864e-34	up	yes	63.9658	67.5557	74.185	4.39311	7.03098	5.74059
chr1	93641584	93641732	149	ENSAPLG00000022174	ENSAPLT00000045493	33309	GUCA1C	GO:0005509(calcium ion binding);GO:0007601(visual perception);GO:0008048(calcium sensitive guanylate cyclase activator activity);GO:0031282(regulation of guanylate cyclase activity)	04744(Phototransduction)	K08328	NA	guanylate cyclase activator 1C [Source:HGNC Symbol;Acc:HGNC:4680]	3' UTR	-0.716	-1.2	-3.1	down	1.12871	0.174669	0.882362	0.909401	up	no	0.150841	0.253221	0.60664	0.395726	0.195799	0.303926
chr1	94877087	94892905	15819	ENSAPLG00000007051	ENSAPLT00000007330	27109	PTGFRN	NA	NA	NA	NA	prostaglandin F2 receptor inhibitor [Source:HGNC Symbol;Acc:HGNC:9601]	Exon (ENSAPLT00000007330/ENSAPLG00000007051, exon 2 of 9)	-12	-13.9	-0.449	down	4.25108	2.08783	4.50585e-15	3.07284e-14	up	yes	65.6295	64.5879	70.7154	20.4787	14.4219	12.3657
chr1	95091118	95091268	151	ENSAPLG00000007123	ENSAPLT00000007392	73825	IGSF3	GO:0032808(lacrimal gland development);GO:0032808(lacrimal gland development)	NA	NA	NA	immunoglobulin superfamily member 3 [Source:HGNC Symbol;Acc:HGNC:5950]	Exon (ENSAPLT00000007392/ENSAPLG00000007123, exon 8 of 10)	-2.27	-3.24	-0.699	down	10.1114	3.33791	1.03247e-39	2.47337e-38	up	yes	126.32	116.118	131.871	14.2173	11.3085	11.4929
chr1	95093600	95093750	151	ENSAPLG00000007123	ENSAPLT00000007392	76307	IGSF3	GO:0032808(lacrimal gland development);GO:0032808(lacrimal gland development)	NA	NA	NA	immunoglobulin superfamily member 3 [Source:HGNC Symbol;Acc:HGNC:5950]	Exon (ENSAPLT00000007392/ENSAPLG00000007123, exon 9 of 10)	-1.16	-1.82	-0.465	down	10.1114	3.33791	1.03247e-39	2.47337e-38	up	yes	126.32	116.118	131.871	14.2173	11.3085	11.4929
chr1	95094625	95094834	210	ENSAPLG00000007123	ENSAPLT00000007392	77332	IGSF3	GO:0032808(lacrimal gland development);GO:0032808(lacrimal gland development)	NA	NA	NA	immunoglobulin superfamily member 3 [Source:HGNC Symbol;Acc:HGNC:5950]	Exon (ENSAPLT00000007392/ENSAPLG00000007123, exon 10 of 10)	-4.38	-5.7	-0.585	down	10.1114	3.33791	1.03247e-39	2.47337e-38	up	yes	126.32	116.118	131.871	14.2173	11.3085	11.4929
chr1	95237263	95242335	5073	ENSAPLG00000020628	ENSAPLT00000032721	0	BCL9	GO:0003713(transcription coactivator activity);GO:0005634(nucleus);GO:0005737(cytoplasm);GO:0005794(Golgi apparatus);GO:0005801(cis-Golgi network);GO:0008013(beta-catenin binding);GO:0014908(myotube differentiation involved in skeletal muscle regeneration);GO:0035019(somatic stem cell population maintenance);GO:0035914(skeletal muscle cell differentiation);GO:0045944(positive regulation of transc…	NA	NA	NA	BCL9, transcription coactivator [Source:HGNC Symbol;Acc:HGNC:1008]	5' UTR	-3.61	-4.81	-0.36	down	3.62997	1.85996	3.2529e-12	1.79414e-11	up	yes	138.931	137.711	145.367	36.72	37.3706	42.1662
chr1	95244145	95244820	676	ENSAPLG00000020628	ENSAPLT00000032721	6882	BCL9	GO:0003713(transcription coactivator activity);GO:0005634(nucleus);GO:0005737(cytoplasm);GO:0005794(Golgi apparatus);GO:0005801(cis-Golgi network);GO:0008013(beta-catenin binding);GO:0014908(myotube differentiation involved in skeletal muscle regeneration);GO:0035019(somatic stem cell population maintenance);GO:0035914(skeletal muscle cell differentiation);GO:0045944(positive regulation of transc…	NA	NA	NA	BCL9, transcription coactivator [Source:HGNC Symbol;Acc:HGNC:1008]	Exon (ENSAPLT00000032721/ENSAPLG00000020628, exon 5 of 8)	-4.23	-5.51	-0.307	down	3.62997	1.85996	3.2529e-12	1.79414e-11	up	yes	138.931	137.711	145.367	36.72	37.3706	42.1662
chr1	95244940	95245478	539	ENSAPLG00000020628	ENSAPLT00000032721	7677	BCL9	GO:0003713(transcription coactivator activity);GO:0005634(nucleus);GO:0005737(cytoplasm);GO:0005794(Golgi apparatus);GO:0005801(cis-Golgi network);GO:0008013(beta-catenin binding);GO:0014908(myotube differentiation involved in skeletal muscle regeneration);GO:0035019(somatic stem cell population maintenance);GO:0035914(skeletal muscle cell differentiation);GO:0045944(positive regulation of transc…	NA	NA	NA	BCL9, transcription coactivator [Source:HGNC Symbol;Acc:HGNC:1008]	Exon (ENSAPLT00000032721/ENSAPLG00000020628, exon 6 of 8)	-3.78	-5	-0.279	down	3.62997	1.85996	3.2529e-12	1.79414e-11	up	yes	138.931	137.711	145.367	36.72	37.3706	42.1662
chr1	95249854	95250841	988	ENSAPLG00000020628	ENSAPLT00000032721	12591	BCL9	GO:0003713(transcription coactivator activity);GO:0005634(nucleus);GO:0005737(cytoplasm);GO:0005794(Golgi apparatus);GO:0005801(cis-Golgi network);GO:0008013(beta-catenin binding);GO:0014908(myotube differentiation involved in skeletal muscle regeneration);GO:0035019(somatic stem cell population maintenance);GO:0035914(skeletal muscle cell differentiation);GO:0045944(positive regulation of transc…	NA	NA	NA	BCL9, transcription coactivator [Source:HGNC Symbol;Acc:HGNC:1008]	Exon (ENSAPLT00000032721/ENSAPLG00000020628, exon 8 of 8)	-4.45	-5.78	-0.196	down	3.62997	1.85996	3.2529e-12	1.79414e-11	up	yes	138.931	137.711	145.367	36.72	37.3706	42.1662
chr1	99420194	99450987	30794	ENSAPLG00000006648	ENSAPLT00000036470	414890	ROBO1	GO:0002042(cell migration involved in sprouting angiogenesis);GO:0005515(protein binding);GO:0005737(cytoplasm);GO:0005886(plasma membrane);GO:0006919(activation of cysteine-type endopeptidase activity involved in apoptotic process);GO:0007156(homophilic cell adhesion via plasma membrane adhesion molecules);GO:0007411(axon guidance);GO:0007507(heart development);GO:0009986(cell surface);GO:002183…	NA	NA	NA	roundabout guidance receptor 1 [Source:HGNC Symbol;Acc:HGNC:10249]	Exon (ENSAPLT00000036470/ENSAPLG00000006648, exon 4 of 29)	-0.407	-0.682	-1.44	down	13.7168	3.77787	5.32483e-32	9.24015e-31	up	yes	19.1547	13.4951	20.8617	1.04759	1.32361	1.52996
chr1	99520723	99523914	3192	ENSAPLG00000006648	ENSAPLT00000036470	515419	ROBO1	GO:0002042(cell migration involved in sprouting angiogenesis);GO:0005515(protein binding);GO:0005737(cytoplasm);GO:0005886(plasma membrane);GO:0006919(activation of cysteine-type endopeptidase activity involved in apoptotic process);GO:0007156(homophilic cell adhesion via plasma membrane adhesion molecules);GO:0007411(axon guidance);GO:0007507(heart development);GO:0009986(cell surface);GO:002183…	NA	NA	NA	roundabout guidance receptor 1 [Source:HGNC Symbol;Acc:HGNC:10249]	Exon (ENSAPLT00000036470/ENSAPLG00000006648, exon 23 of 29)	-0.827	-1.36	0.762	up	13.7168	3.77787	5.32483e-32	9.24015e-31	up	yes	19.1547	13.4951	20.8617	1.04759	1.32361	1.52996
chr1	99524093	99528036	3944	ENSAPLG00000006648	ENSAPLT00000036470	518789	ROBO1	GO:0002042(cell migration involved in sprouting angiogenesis);GO:0005515(protein binding);GO:0005737(cytoplasm);GO:0005886(plasma membrane);GO:0006919(activation of cysteine-type endopeptidase activity involved in apoptotic process);GO:0007156(homophilic cell adhesion via plasma membrane adhesion molecules);GO:0007411(axon guidance);GO:0007507(heart development);GO:0009986(cell surface);GO:002183…	NA	NA	NA	roundabout guidance receptor 1 [Source:HGNC Symbol;Acc:HGNC:10249]	Exon (ENSAPLT00000036470/ENSAPLG00000006648, exon 25 of 29)	-1.27	-1.98	-1.02	down	13.7168	3.77787	5.32483e-32	9.24015e-31	up	yes	19.1547	13.4951	20.8617	1.04759	1.32361	1.52996
chr1	107294586	107297183	2598	ENSAPLG00000004718	ENSAPLT00000004864	0	MAP3K7CL	NA	04010(MAPK signaling pathway);04310(Wnt signaling pathway);04140(Autophagy - animal);04520(Adherens junction);04620(Toll-like receptor signaling pathway);04621(NOD-like receptor signaling pathway);04622(RIG-I-like receptor signaling pathway);05168(Herpes simplex infection);05168(Herpes simplex infection)	K04427	EC:2.7.11.25	MAP3K7 C-terminal like [Source:HGNC Symbol;Acc:HGNC:16457]	5' UTR	-4.18	-5.46	-1.95	down	0.0668733	-3.90243	6.18148e-24	7.26096e-23	down	yes	1.00022	2.016	3.32076	41.1773	25.181	28.4027
chr1	109868946	109870121	1176	ENSAPLG00000015892	ENSAPLT00000016575	148	CBR1	GO:0004090(carbonyl reductase (NADPH) activity);GO:0016491(oxidoreductase activity);GO:0016655(oxidoreductase activity, acting on NAD(P)H, quinone or similar compound as acceptor);GO:0017144(drug metabolic process);GO:0030855(epithelial cell differentiation);GO:0042373(vitamin K metabolic process);GO:0055114(oxidation-reduction process)	00590(Arachidonic acid metabolism);00790(Folate biosynthesis);00980(Metabolism of xenobiotics by cytochrome P450)	K00079	EC:1.1.1.184;EC:1.1.1.189	carbonyl reductase 1 [Source:HGNC Symbol;Acc:HGNC:1548]	Exon (ENSAPLT00000016575/ENSAPLG00000015892, exon 1 of 4)	-0.902	-1.47	-0.624	down	7.02877	2.81327	1.15158e-17	9.45154e-17	up	yes	46.4515	46.8513	59.5717	8.53056	8.65071	4.56854
chr1	111408969	111409028	60	ENSAPLG00000019280	ENSAPLT00000017990	2880		GO:0006486(protein glycosylation);GO:0008378(galactosyltransferase activity);GO:0016020(membrane)	00601(Glycosphingolipid biosynthesis - lacto and neolacto series);00603(Glycosphingolipid biosynthesis - globo and isoglobo series)	K03877	EC:2.4.1.-		Exon (ENSAPLT00000017990/ENSAPLG00000019280, exon 3 of 3)	-0.276	-0.423	-2.81	down	-inf	-inf	1	1	down	no	0	0	0	0.260914	0.711494	0.327061
chr1	113442578	113449998	7421	ENSAPLG00000007792	ENSAPLT00000008080	85053		GO:0002162(dystroglycan binding);GO:0003779(actin binding);GO:0005515(protein binding)	NA	NA	NA		Exon (ENSAPLT00000008080/ENSAPLG00000007792, exon 8 of 14)	-1.2	-1.88	-3.64	down	0.0828683	-3.59304	0.00224437	0.00449332	down	yes	0.05153	0.438126	0	0.905463	3.17215	1.83123
chr1	117055786	117057222	1437	ENSAPLG00000012043	ENSAPLT00000012548	16086	APOO	GO:0000139(Golgi membrane);GO:0005576(extracellular region);GO:0005739(mitochondrion);GO:0005789(endoplasmic reticulum membrane);GO:0005829(cytosol);GO:0031305(integral component of mitochondrial inner membrane);GO:0042407(cristae formation);GO:0061617(MICOS complex)	NA	NA	NA	apolipoprotein O [Source:HGNC Symbol;Acc:HGNC:28727]	Exon (ENSAPLT00000012548/ENSAPLG00000012043, exon 6 of 6)	-2.54	-3.56	0.429	up	1.0047	0.00676814	0.445411	0.517308	up	no	26.2018	24.3186	27.1838	32.3825	17.3008	27.6573
chr1	121667583	121667818	236	ENSAPLG00000002101	ENSAPLT00000002097	910	GPR34	GO:0004930(G protein-coupled receptor activity);GO:0007186(G protein-coupled receptor signaling pathway);GO:0016021(integral component of membrane)	NA	NA	NA	G protein-coupled receptor 34 [Source:HGNC Symbol;Acc:HGNC:4490]	Exon (ENSAPLT00000002097/ENSAPLG00000002101, exon 1 of 1)	-0.579	-0.984	1.42	up	0.627667	-0.671929	1	1	down	no	0.479036	0.104737	0.629063	1.19731	0.43325	0.301731
chr1	122211180	122211269	90	ENSAPLG00000013230	ENSAPLT00000018818	60	MAOA	GO:0005739(mitochondrion);GO:0008131(primary amine oxidase activity);GO:0009967(positive regulation of signal transduction);GO:0016491(oxidoreductase activity);GO:0042420(dopamine catabolic process);GO:0055114(oxidation-reduction process);GO:0055114(oxidation-reduction process)	00260(Glycine, serine and threonine metabolism);00330(Arginine and proline metabolism);00340(Histidine metabolism);00350(Tyrosine metabolism);00360(Phenylalanine metabolism);00380(Tryptophan metabolism);00982(Drug metabolism - cytochrome P450);00982(Drug metabolism - cytochrome P450)	K00274	EC:1.4.3.4	monoamine oxidase A [Source:HGNC Symbol;Acc:HGNC:6833]	Exon (ENSAPLT00000018818/ENSAPLG00000013230, exon 1 of 14)	-0.743	-1.24	-0.901	down	0.23528	-2.08755	3.48679e-13	2.09919e-12	down	yes	4.5788	10.1205	10.9843	37.276	36.5241	35.3617
chr1	123170580	123170936	357	ENSAPLG00000010902	ENSAPLT00000018408	10674		NA	04514(Cell adhesion molecules (CAMs));04672(Intestinal immune network for IgA production)	K06710	NA		3' UTR	-0.544	-0.924	-1.62	down	12.1674	3.60495	0.00149294	0.00308107	up	yes	1.51203	1.34763	2.25	0.303206	0.116739	0
chr1	124061039	124061129	91	ENSAPLG00000007969	ENSAPLT00000034072	5710	RSPH1	GO:0000794(condensed nuclear chromosome);GO:0001520(outer dense fiber);GO:0005737(cytoplasm);GO:0007286(spermatid development);GO:0031514(motile cilium);GO:0035082(axoneme assembly);GO:0036126(sperm flagellum);GO:0072687(meiotic spindle);GO:0072687(meiotic spindle)	NA	NA	NA	radial spoke head component 1 [Source:HGNC Symbol;Acc:HGNC:12371]	Exon (ENSAPLT00000034072/ENSAPLG00000007969, exon 8 of 8)	-0.563	-0.955	-3	down	inf	inf	1	1	up	no	0.439343	0.205035	0	0	0	0
chr1	124345988	124346287	300	ENSAPLG00000000767	ENSAPLT00000000744	149	ZBTB21	GO:0003676(nucleic acid binding);GO:0005515(protein binding);GO:0005634(nucleus);GO:0005654(nucleoplasm);GO:0005829(cytosol);GO:0008327(methyl-CpG binding)	NA	NA	NA	zinc finger and BTB domain containing 21 [Source:HGNC Symbol;Acc:HGNC:13083]	Exon (ENSAPLT00000000744/ENSAPLG00000000767, exon 1 of 1)	-1.05	-1.67	1.61	up	1.02982	0.0423954	0.525037	0.595894	up	no	3.41891	3.54315	3.8876	3.59238	4.06471	2.87837
chr1	124348229	124348439	211	ENSAPLG00000000767	ENSAPLT00000000744	2390	ZBTB21	GO:0003676(nucleic acid binding);GO:0005515(protein binding);GO:0005634(nucleus);GO:0005654(nucleoplasm);GO:0005829(cytosol);GO:0008327(methyl-CpG binding)	NA	NA	NA	zinc finger and BTB domain containing 21 [Source:HGNC Symbol;Acc:HGNC:13083]	Exon (ENSAPLT00000000744/ENSAPLG00000000767, exon 1 of 1)	-1.04	-1.65	-1.09	down	1.02982	0.0423954	0.525037	0.595894	up	no	3.41891	3.54315	3.8876	3.59238	4.06471	2.87837
chr1	124487706	124488873	1168	ENSAPLG00000016253	ENSAPLT00000016957	16877	RIPK4	GO:0002009(morphogenesis of an epithelium);GO:0004672(protein kinase activity);GO:0005515(protein binding);GO:0005524(ATP binding);GO:0005737(cytoplasm);GO:0006468(protein phosphorylation);GO:0051092(positive regulation of NF-kappaB transcription factor activity)	NA	NA	NA	receptor interacting serine/threonine kinase 4 [Source:HGNC Symbol;Acc:HGNC:496]	Exon (ENSAPLT00000016957/ENSAPLG00000016253, exon 8 of 8)	-0.511	-0.865	1.79	up	inf	inf	1.09972e-100	1.77415e-98	up	yes	28.6684	21.7231	31.6065	0	0	0
chr1	125188260	125188410	151	ENSAPLG00000008909	ENSAPLT00000029271	18243	ADGRG2	GO:0004888(transmembrane signaling receptor activity);GO:0004930(G protein-coupled receptor activity);GO:0005829(cytosol);GO:0005886(plasma membrane);GO:0007166(cell surface receptor signaling pathway);GO:0007186(G protein-coupled receptor signaling pathway);GO:0016021(integral component of membrane)	NA	NA	NA	adhesion G protein-coupled receptor G2 [Source:HGNC Symbol;Acc:HGNC:4516]	Exon (ENSAPLT00000029271/ENSAPLG00000008909, exon 3 of 27)	-1.08	-1.71	-3.41	down	1.05227	0.0735097	0.788054	0.833931	up	no	0.478807	0.403319	0.921954	0.641412	0.807767	0.26528
chr1	125211084	125211204	121	ENSAPLG00000008909	ENSAPLT00000029271	41067	ADGRG2	GO:0004888(transmembrane signaling receptor activity);GO:0004930(G protein-coupled receptor activity);GO:0005829(cytosol);GO:0005886(plasma membrane);GO:0007166(cell surface receptor signaling pathway);GO:0007186(G protein-coupled receptor signaling pathway);GO:0016021(integral component of membrane)	NA	NA	NA	adhesion G protein-coupled receptor G2 [Source:HGNC Symbol;Acc:HGNC:4516]	Exon (ENSAPLT00000029271/ENSAPLG00000008909, exon 14 of 27)	-1.03	-1.65	-2.45	down	1.05227	0.0735097	0.788054	0.833931	up	no	0.478807	0.403319	0.921954	0.641412	0.807767	0.26528
chr1	126882163	126882223	61	ENSAPLG00000018586	ENSAPLT00000025963	9439	PIGA	GO:0000506(glycosylphosphatidylinositol-N-acetylglucosaminyltransferase (GPI-GnT) complex);GO:0005789(endoplasmic reticulum membrane);GO:0006506(GPI anchor biosynthetic process);GO:0017176(phosphatidylinositol N-acetylglucosaminyltransferase activity);GO:1990830(cellular response to leukemia inhibitory factor)	00563(Glycosylphosphatidylinositol(GPI)-anchor biosynthesis)	K03857	EC:2.4.1.198	phosphatidylinositol glycan anchor biosynthesis class A [Source:HGNC Symbol;Acc:HGNC:8957]	3' UTR	-0.982	-1.58	-3.66	down	1.06374	0.0891449	0.811602	0.852956	up	no	0.95015	0.676177	0.957009	1.07178	1.00083	0.355935
chr1	129368282	129418679	50398	ENSAPLG00000007693	ENSAPLT00000032156	141165	MID1	GO:0005515(protein binding);GO:0005622(intracellular);GO:0005737(cytoplasm);GO:0005874(microtubule);GO:0005881(cytoplasmic microtubule);GO:0007026(negative regulation of microtubule depolymerization);GO:0008017(microtubule binding);GO:0008270(zinc ion binding);GO:0015630(microtubule cytoskeleton);GO:0031625(ubiquitin protein ligase binding);GO:0032874(positive regulation of stress-activated MAPK …	04120(Ubiquitin mediated proteolysis)	K08285	EC:2.3.2.27	midline 1 [Source:HGNC Symbol;Acc:HGNC:7095]	Exon (ENSAPLT00000032156/ENSAPLG00000007693, exon 2 of 10)	-0.563	-0.956	-1.39	down	0.664725	-0.589171	0.257	0.323443	down	no	0.705664	0.41842	2.88577	3.53536	1.74567	0.751323
chr1	133452136	133453070	935	ENSAPLG00000005062	ENSAPLT00000047621	83407	YAP1	GO:0000902(cell morphogenesis);GO:0000978(RNA polymerase II proximal promoter sequence-specific DNA binding);GO:0001570(vasculogenesis);GO:0001894(tissue homeostasis);GO:0003015(heart process);GO:0003143(embryonic heart tube morphogenesis);GO:0003682(chromatin binding);GO:0003713(transcription coactivator activity);GO:0003714(transcription corepressor activity);GO:0005515(protein binding);GO:0005…	04390(Hippo signaling pathway);04392(Hippo signaling pathway - multiple species);04392(Hippo signaling pathway - multiple species)	K16687	NA	Yes associated protein 1 [Source:HGNC Symbol;Acc:HGNC:16262]	Exon (ENSAPLT00000047621/ENSAPLG00000005062, exon 7 of 8)	-15	-17.1	-1.41	down	2.11044	1.07754	0.00265006	0.00522971	up	yes	23.7067	22.5842	33.0401	14.4904	11.7094	11.39
chr1	133497997	133499061	1065	ENSAPLG00000005387	ENSAPLT00000005609	6120		GO:0042981(regulation of apoptotic process)	04120(Ubiquitin mediated proteolysis);04210(Apoptosis);04217(Necroptosis);04510(Focal adhesion);04621(NOD-like receptor signaling pathway)	K16060	NA		Exon (ENSAPLT00000005609/ENSAPLG00000005387, exon 7 of 8)	-1.86	-2.73	-0.956	down	0.716153	-0.48166	0.0028562	0.00561078	down	no	14.0712	12.0606	17.6953	22.1794	20.605	18.4136
chr1	135979757	135981194	1438	ENSAPLG00000012735	ENSAPLT00000013383	55150	ATM	GO:0000077(DNA damage checkpoint);GO:0000723(telomere maintenance);GO:0000724(double-strand break repair via homologous recombination);GO:0000781(chromosome, telomeric region);GO:0001541(ovarian follicle development);GO:0001756(somitogenesis);GO:0002331(pre-B cell allelic exclusion);GO:0002376(immune system process);GO:0002377(immunoglobulin production);GO:0004672(protein kinase activity);GO:0004…	03440(Homologous recombination);04068(FoxO signaling pathway);04110(Cell cycle);04210(Apoptosis);04115(p53 signaling pathway);04218(Cellular senescence)	K04728	EC:2.7.11.1	ATM serine/threonine kinase [Source:HGNC Symbol;Acc:HGNC:795]	Exon (ENSAPLT00000013383/ENSAPLG00000012735, exon 50 of 59)	-0.869	-1.42	-1.42	down	1.47869	0.564321	0.52624	0.597008	up	no	0.74143	0.663447	1.29855	0.959049	0.550894	0.318311
chr1	137580781	137594229	13449	ENSAPLG00000002720	ENSAPLT00000002830	30627	IFT88	GO:0005515(protein binding);GO:0005813(centrosome);GO:0005814(centriole);GO:0005929(cilium);GO:0036064(ciliary basal body)	NA	NA	NA	intraflagellar transport 88 [Source:HGNC Symbol;Acc:HGNC:20606]	Exon (ENSAPLT00000002830/ENSAPLG00000002720, exon 23 of 26)	-1.32	-2.04	1.43	up	0.743973	-0.426679	0.254322	0.320502	down	no	0.424928	0.832318	1.26615	1.01139	1.56552	0.814882
chr1	137611477	137611772	296	ENSAPLG00000027941	ENSAPLT00000042024	9358	IL17D	GO:0005125(cytokine activity);GO:0005576(extracellular region);GO:0005615(extracellular space);GO:0006954(inflammatory response);GO:0032725(positive regulation of granulocyte macrophage colony-stimulating factor production);GO:0032755(positive regulation of interleukin-6 production);GO:0032757(positive regulation of interleukin-8 production);GO:0042803(protein homodimerization activity);GO:004801…	04060(Cytokine-cytokine receptor interaction);04625(C-type lectin receptor signaling pathway)	K05492	NA	interleukin 17D [Source:HGNC Symbol;Acc:HGNC:5984]	3' UTR	-1.69	-2.52	-0.935	down	0.337596	-1.56663	0.000245269	0.00057398	down	yes	0.936756	2.14694	2.44907	6.20581	5.72316	4.45973
chr1	137612186	137612275	90	ENSAPLG00000027941	ENSAPLT00000042024	10067	IL17D	GO:0005125(cytokine activity);GO:0005576(extracellular region);GO:0005615(extracellular space);GO:0006954(inflammatory response);GO:0032725(positive regulation of granulocyte macrophage colony-stimulating factor production);GO:0032755(positive regulation of interleukin-6 production);GO:0032757(positive regulation of interleukin-8 production);GO:0042803(protein homodimerization activity);GO:004801…	04060(Cytokine-cytokine receptor interaction);04625(C-type lectin receptor signaling pathway)	K05492	NA	interleukin 17D [Source:HGNC Symbol;Acc:HGNC:5984]	3' UTR	-0.636	-1.08	2.49	up	0.337596	-1.56663	0.000245269	0.00057398	down	yes	0.936756	2.14694	2.44907	6.20581	5.72316	4.45973
chr1	140523261	140528928	5668	ENSAPLG00000006496	ENSAPLT00000036610	538	PAN3	GO:0000289(nuclear-transcribed mRNA poly(A) tail shortening);GO:0000290(deadenylation-dependent decapping of nuclear-transcribed mRNA);GO:0000932(P-body);GO:0003723(RNA binding);GO:0004535(poly(A)-specific ribonuclease activity);GO:0004672(protein kinase activity);GO:0005524(ATP binding);GO:0006397(mRNA processing);GO:0006468(protein phosphorylation);GO:0006605(protein targeting);GO:0010606(posit…	03018(RNA degradation);03018(RNA degradation)	K12572	NA	poly(A) specific ribonuclease subunit PAN3 [Source:HGNC Symbol;Acc:HGNC:29991]	Exon (ENSAPLT00000036610/ENSAPLG00000006496, exon 1 of 20)	-0.746	-1.24	-2.24	down	0.607715	-0.718533	0.00136798	0.00283751	down	no	2.97385	2.52597	3.59537	5.67604	5.27892	4.01126
chr1	140599928	140602812	2885	ENSAPLG00000006496	ENSAPLT00000036610	77205	PAN3	GO:0000289(nuclear-transcribed mRNA poly(A) tail shortening);GO:0000290(deadenylation-dependent decapping of nuclear-transcribed mRNA);GO:0000932(P-body);GO:0003723(RNA binding);GO:0004535(poly(A)-specific ribonuclease activity);GO:0004672(protein kinase activity);GO:0005524(ATP binding);GO:0006397(mRNA processing);GO:0006468(protein phosphorylation);GO:0006605(protein targeting);GO:0010606(posit…	03018(RNA degradation);03018(RNA degradation)	K12572	NA	poly(A) specific ribonuclease subunit PAN3 [Source:HGNC Symbol;Acc:HGNC:29991]	3' UTR	-0.869	-1.42	1.14	up	0.607715	-0.718533	0.00136798	0.00283751	down	no	2.97385	2.52597	3.59537	5.67604	5.27892	4.01126
chr1	141978247	141979285	1039	ENSAPLG00000007774	ENSAPLT00000008073	22518	BRCA2	GO:0000281(mitotic cytokinesis);GO:0000722(telomere maintenance via recombination);GO:0000724(double-strand break repair via homologous recombination);GO:0000784(nuclear chromosome, telomeric region);GO:0000800(lateral element);GO:0001556(oocyte maturation);GO:0001833(inner cell mass cell proliferation);GO:0002020(protease binding);GO:0003697(single-stranded DNA binding);GO:0005634(nucleus);GO:00…	03440(Homologous recombination);03460(Fanconi anemia pathway)	K08775	NA	BRCA2, DNA repair associated [Source:HGNC Symbol;Acc:HGNC:1101]	Exon (ENSAPLT00000008073/ENSAPLG00000007774, exon 13 of 26)	-0.404	-0.677	-2.17	down	1.66399	0.734644	0.29333	0.36258	up	no	0.749541	0.807022	1.83361	0.692526	0.765592	0.57926
chr1	145065859	145068222	2364	ENSAPLG00000016175	ENSAPLT00000016872	9281	CHST10	GO:0008146(sulfotransferase activity);GO:0016021(integral component of membrane);GO:0016051(carbohydrate biosynthetic process);GO:0016051(carbohydrate biosynthetic process)	00515(Mannose type O-glycan biosyntheis);00515(Mannose type O-glycan biosyntheis)	K09674	EC:2.8.2.-	carbohydrate sulfotransferase 10 [Source:HGNC Symbol;Acc:HGNC:19650]	3' UTR	-5.18	-6.58	-0.637	down	2.95503	1.56317	3.63959e-05	9.59376e-05	up	yes	11.2921	11.6416	16.4797	4.5346	5.59453	3.20857
chr1	147817274	147817333	60	ENSAPLG00000026293	ENSAPLT00000036753	4273	NIPA2	GO:0005769(early endosome);GO:0005886(plasma membrane);GO:0015095(magnesium ion transmembrane transporter activity);GO:0015693(magnesium ion transport);GO:0016021(integral component of membrane)	NA	NA	NA	NIPA magnesium transporter 2 [Source:HGNC Symbol;Acc:HGNC:17044]	Exon (ENSAPLT00000036753/ENSAPLG00000026293, exon 5 of 5)	-1.04	-1.66	0.756	up	0.927391	-0.108751	0.143159	0.193623	down	no	35.544	33.6309	31.4073	35.994	36.1884	36.2746
chr1	148107708	148109617	1910	ENSAPLG00000005653	ENSAPLT00000005869	22224	JADE3	GO:0000123(histone acetyltransferase complex);GO:0043966(histone H3 acetylation);GO:0043981(histone H4-K5 acetylation);GO:0043982(histone H4-K8 acetylation);GO:0043983(histone H4-K12 acetylation)	NA	NA	NA	jade family PHD finger 3 [Source:HGNC Symbol;Acc:HGNC:22982]	Exon (ENSAPLT00000005869/ENSAPLG00000005653, exon 8 of 10)	-0.778	-1.29	0.402	up	1.34039	0.422653	0.538881	0.609347	up	no	12.9694	11.6111	14.5733	9.41683	11.4679	8.32599
chr1	148510819	148518412	7594	ENSAPLG00000012938	ENSAPLT00000013462	21317	SHOX	GO:0001228(DNA-binding transcription activator activity, RNA polymerase II-specific);GO:0003677(DNA binding);GO:0005654(nucleoplasm);GO:0006355(regulation of transcription, DNA-templated);GO:0043231(intracellular membrane-bounded organelle);GO:0043565(sequence-specific DNA binding);GO:0045944(positive regulation of transcription by RNA polymerase II)	NA	NA	NA	short stature homeobox [Source:HGNC Symbol;Acc:HGNC:10853]	5' UTR	-0.735	-1.22	0.63	up	1.04171	0.0589496	0.787375	0.833382	up	no	0.733925	2.00582	2.1608	1.49819	2.43898	0.767167
chr1	150149858	150176393	26536	ENSAPLG00000012441	ENSAPLT00000012948	0	RAP2A	GO:0000287(magnesium ion binding);GO:0001934(positive regulation of protein phosphorylation);GO:0003924(GTPase activity);GO:0005525(GTP binding);GO:0005829(cytosol);GO:0005886(plasma membrane);GO:0007165(signal transduction);GO:0016020(membrane);GO:0019003(GDP binding);GO:0030033(microvillus assembly);GO:0030336(negative regulation of cell migration);GO:0031532(actin cytoskeleton reorganization);…	NA	NA	NA	RAP2A, member of RAS oncogene family [Source:HGNC Symbol;Acc:HGNC:9861]	Exon (ENSAPLT00000012948/ENSAPLG00000012441, exon 1 of 2)	-2.62	-3.65	0.827	up	2.93992	1.55578	0.00930063	0.0166486	up	yes	12.4966	12.4842	17.8101	5.38151	3.89901	5.27459
chr1	152745378	152747129	1752	ENSAPLG00000004995	ENSAPLT00000005161	2184		GO:0003677(DNA binding);GO:0003697(single-stranded DNA binding);GO:0003824(catalytic activity);GO:0004518(nuclease activity);GO:0004519(endonuclease activity);GO:0005634(nucleus);GO:0006281(DNA repair);GO:0006289(nucleotide-excision repair);GO:0016788(hydrolase activity, acting on ester bonds)	03420(Nucleotide excision repair)	K10846	NA		Exon (ENSAPLT00000005161/ENSAPLG00000004995, exon 4 of 15)	-0.786	-1.3	-1.17	down	0.651507	-0.618148	0.0335553	0.0532604	down	no	1.29707	1.27982	2.06589	2.24288	2.89916	1.98419
chr1	157148100	157148189	90	ENSAPLG00000021237	ENSAPLT00000024452	1281	IRS2	GO:0002053(positive regulation of mesenchymal cell proliferation);GO:0002903(negative regulation of B cell apoptotic process);GO:0005158(insulin receptor binding);GO:0005829(cytosol);GO:0005886(plasma membrane);GO:0007420(brain development);GO:0008283(cell population proliferation);GO:0008284(positive regulation of cell population proliferation);GO:0008286(insulin receptor signaling pathway);GO:0…	04068(FoxO signaling pathway);04140(Autophagy - animal);04910(Insulin signaling pathway);04920(Adipocytokine signaling pathway)	K07187	NA	insulin receptor substrate 2 [Source:HGNC Symbol;Acc:HGNC:6126]	Exon (ENSAPLT00000024452/ENSAPLG00000021237, exon 1 of 3)	-0.42	-0.705	1.94	up	0.0617278	-4.01794	6.73788e-46	2.02824e-44	down	yes	3.11853	3.35435	3.53958	40.0647	77.2412	44.8977
chr1	158908975	158909302	328	ENSAPLG00000029506	ENSAPLT00000023353	0	CHAMP1	GO:0000777(condensed chromosome kinetochore);GO:0000793(condensed chromosome);GO:0003676(nucleic acid binding);GO:0005634(nucleus);GO:0005654(nucleoplasm);GO:0005819(spindle);GO:0031134(sister chromatid biorientation);GO:0034501(protein localization to kinetochore);GO:0035372(protein localization to microtubule);GO:0051315(attachment of mitotic spindle microtubules to kinetochore);GO:0090543(Flem…	NA	NA	NA	chromosome alignment maintaining phosphoprotein 1 [Source:HGNC Symbol;Acc:HGNC:20311]	Exon (ENSAPLT00000023353/ENSAPLG00000029506, exon 1 of 2)	-10.3	-12.1	-1.19	down	2.33005	1.22036	0.000161071	0.000386308	up	yes	23.0066	25.4127	25.1364	11.3122	8.86153	11.3946
chr1	162889992	162893152	3161	ENSAPLG00000011935	ENSAPLT00000012445	6042	DZIP1	GO:0003676(nucleic acid binding);GO:0005634(nucleus);GO:0005654(nucleoplasm);GO:0005737(cytoplasm);GO:0005814(centriole);GO:0005815(microtubule organizing center);GO:0005829(cytosol);GO:0007224(smoothened signaling pathway);GO:0007281(germ cell development);GO:0036064(ciliary basal body);GO:0043393(regulation of protein binding);GO:0044782(cilium organization);GO:0045184(establishment of protein …	NA	NA	NA	DAZ interacting zinc finger protein 1 [Source:HGNC Symbol;Acc:HGNC:20908]	Exon (ENSAPLT00000012445/ENSAPLG00000011935, exon 4 of 18)	-0.595	-1.01	1.87	up	2.84333	1.50758	0.0875998	0.1259	up	no	1.37468	1.34116	1.83704	0.239417	0.918291	0.443546
chr1	167913122	167913359	238	ENSAPLG00000011486	ENSAPLT00000011951	386	SLITRK6	GO:0005515(protein binding);GO:0005886(plasma membrane);GO:0005887(integral component of plasma membrane);GO:0007416(synapse assembly);GO:0009986(cell surface)	04512(ECM-receptor interaction)	K06262	NA	SLIT and NTRK like family member 6 [Source:HGNC Symbol;Acc:HGNC:23503]	Exon (ENSAPLT00000011951/ENSAPLG00000011486, exon 1 of 1)	-0.29	-0.438	2.17	up	inf	inf	3.69705e-10	1.68679e-09	up	yes	0.855134	0.650915	1.17707	0	0	0
chr1	167914843	167915258	416	ENSAPLG00000011486	ENSAPLT00000011951	2107	SLITRK6	GO:0005515(protein binding);GO:0005886(plasma membrane);GO:0005887(integral component of plasma membrane);GO:0007416(synapse assembly);GO:0009986(cell surface)	04512(ECM-receptor interaction)	K06262	NA	SLIT and NTRK like family member 6 [Source:HGNC Symbol;Acc:HGNC:23503]	Exon (ENSAPLT00000011951/ENSAPLG00000011486, exon 1 of 1)	-0.506	-0.856	4.25	up	inf	inf	3.69705e-10	1.68679e-09	up	yes	0.855134	0.650915	1.17707	0	0	0
chr1	172699879	172711861	11983	ENSAPLG00000003221	ENSAPLT00000003299	3295	CWC15	GO:0000398(mRNA splicing, via spliceosome);GO:0005634(nucleus);GO:0005681(spliceosomal complex);GO:0005739(mitochondrion);GO:0016607(nuclear speck);GO:0071007(U2-type catalytic step 2 spliceosome);GO:0071013(catalytic step 2 spliceosome)	03040(Spliceosome)	K12863	NA	CWC15 spliceosome associated protein homolog [Source:HGNC Symbol;Acc:HGNC:26939]	3' UTR	-13.4	-15.5	-0.242	down	0.772262	-0.372837	0.00615309	0.0114079	down	no	119.14	119.5	106.229	133.687	151.328	161.555
chr1	173028159	173028309	151	ENSAPLG00000015398	ENSAPLT00000016044	2967	VSTM5	GO:0005886(plasma membrane);GO:0016021(integral component of membrane);GO:0021517(ventral spinal cord development);GO:0030424(axon);GO:0030425(dendrite);GO:0046847(filopodium assembly);GO:0051260(protein homooligomerization);GO:1904891(positive regulation of excitatory synapse assembly)	NA	NA	NA	V-set and transmembrane domain containing 5 [Source:HGNC Symbol;Acc:HGNC:34443]	Exon (ENSAPLT00000016044/ENSAPLG00000015398, exon 2 of 4)	-0.32	-0.51	1.87	up	inf	inf	5.07669e-07	1.65981e-06	up	yes	1.22565	0.510467	1.19256	0	0	0
chr1	174744760	174747516	2757	ENSAPLG00000000579	ENSAPLT00000001034	11580	CHORDC1	GO:0005524(ATP binding);GO:0008270(zinc ion binding);GO:0010824(regulation of centrosome duplication);GO:0043531(ADP binding);GO:0051879(Hsp90 protein binding);GO:0061077(chaperone-mediated protein folding);GO:1900034(regulation of cellular response to heat);GO:2000299(negative regulation of Rho-dependent protein serine/threonine kinase activity)	NA	NA	NA	cysteine and histidine rich domain containing 1 [Source:HGNC Symbol;Acc:HGNC:14525]	3' UTR	-0.822	-1.35	-0.605	down	0.634707	-0.655837	0.113421	0.158382	down	no	2.36336	2.08732	2.35853	5.88458	2.75708	2.08646
chr1	178850151	178850511	361	ENSAPLG00000012782	ENSAPLT00000013438	152179	MYCBP2	GO:0005085(guanyl-nucleotide exchange factor activity);GO:0005634(nucleus);GO:0008045(motor neuron axon guidance);GO:0008270(zinc ion binding);GO:0008536(Ran GTPase binding);GO:0015630(microtubule cytoskeleton);GO:0016567(protein ubiquitination);GO:0021785(branchiomotor neuron axon guidance);GO:0021952(central nervous system projection neuron axonogenesis);GO:0030424(axon);GO:0031398(positive reg…	NA	NA	NA	MYC binding protein 2, E3 ubiquitin protein ligase [Source:HGNC Symbol;Acc:HGNC:23386]	Exon (ENSAPLT00000013438/ENSAPLG00000012782, exon 55 of 82)	-1.03	-1.65	-1.24	down	0.812149	-0.300183	0.0173777	0.0294429	down	no	4.01828	4.43941	6.27323	7.37819	6.04524	4.71476
chr1	178851441	178851531	91	ENSAPLG00000012782	ENSAPLT00000013438	153469	MYCBP2	GO:0005085(guanyl-nucleotide exchange factor activity);GO:0005634(nucleus);GO:0008045(motor neuron axon guidance);GO:0008270(zinc ion binding);GO:0008536(Ran GTPase binding);GO:0015630(microtubule cytoskeleton);GO:0016567(protein ubiquitination);GO:0021785(branchiomotor neuron axon guidance);GO:0021952(central nervous system projection neuron axonogenesis);GO:0030424(axon);GO:0031398(positive reg…	NA	NA	NA	MYC binding protein 2, E3 ubiquitin protein ligase [Source:HGNC Symbol;Acc:HGNC:23386]	Exon (ENSAPLT00000013438/ENSAPLG00000012782, exon 55 of 82)	-0.673	-1.13	-0.929	down	0.812149	-0.300183	0.0173777	0.0294429	down	no	4.01828	4.43941	6.27323	7.37819	6.04524	4.71476
chr1	179608262	179608472	211	ENSAPLG00000004362	ENSAPLT00000004555	79131	TBC1D4	GO:0005096(GTPase activator activity);GO:0005515(protein binding);GO:0005829(cytosol);GO:0016192(vesicle-mediated transport);GO:0032869(cellular response to insulin stimulus)	NA	NA	NA	TBC1 domain family member 4 [Source:HGNC Symbol;Acc:HGNC:19165]	Exon (ENSAPLT00000004555/ENSAPLG00000004362, exon 19 of 19)	-1.16	-1.82	-0.947	down	0.110641	-3.17604	5.62391e-28	8.15545e-27	down	yes	1.88826	1.29592	2.07141	13.7451	20.1573	13.5987
chr1	180213286	180229673	16388	ENSAPLG00000030690	ENSAPLT00000029113	153299	KLF12	GO:0000122(negative regulation of transcription by RNA polymerase II);GO:0000977(RNA polymerase II regulatory region sequence-specific DNA binding);GO:0001227(DNA-binding transcription repressor activity, RNA polymerase II-specific);GO:0003676(nucleic acid binding);GO:0003677(DNA binding);GO:0003700(DNA-binding transcription factor activity);GO:0005654(nucleoplasm);GO:0005829(cytosol);GO:0006355(…	NA	NA	NA	Kruppel like factor 12 [Source:HGNC Symbol;Acc:HGNC:6346]	3' UTR	-1.76	-2.6	0.907	up	0.368592	-1.4399	2.49409e-06	7.57396e-06	down	yes	2.68052	2.28806	5.17542	8.97636	10.1901	8.35452
chr1	181382437	181401399	18963	ENSAPLG00000012935	ENSAPLT00000013476	311274	DACH1	GO:0000122(negative regulation of transcription by RNA polymerase II);GO:0000977(RNA polymerase II regulatory region sequence-specific DNA binding);GO:0000978(RNA polymerase II proximal promoter sequence-specific DNA binding);GO:0000981(DNA-binding transcription factor activity, RNA polymerase II-specific);GO:0001227(DNA-binding transcription repressor activity, RNA polymerase II-specific);GO:000…	NA	NA	NA	dachshund family transcription factor 1 [Source:HGNC Symbol;Acc:HGNC:2663]	3' UTR	-1.81	-2.68	-1	down	2.3537	1.23493	0.060975	0.0913476	up	no	2.82968	3.16686	4.06244	0.786706	2.20423	1.28276
chr1	186027147	186027356	210	ENSAPLG00000014071	ENSAPLT00000014655	596	PCDH17	GO:0005509(calcium ion binding);GO:0005886(plasma membrane);GO:0007155(cell adhesion);GO:0007156(homophilic cell adhesion via plasma membrane adhesion molecules);GO:0016020(membrane);GO:0030534(adult behavior);GO:0050805(negative regulation of synaptic transmission);GO:0098978(glutamatergic synapse);GO:0098982(GABA-ergic synapse);GO:0099055(integral component of postsynaptic membrane);GO:0099056(…	NA	NA	NA	protocadherin 17 [Source:HGNC Symbol;Acc:HGNC:14267]	Exon (ENSAPLT00000014655/ENSAPLG00000014071, exon 1 of 4)	-0.532	-0.904	1.22	up	1.64282	0.716179	0.457422	0.529412	up	no	0.598432	0.964637	0.653721	0.438265	0.56897	0.342142
chr1	186110385	186110563	179	ENSAPLG00000014071	ENSAPLT00000014655	83834	PCDH17	GO:0005509(calcium ion binding);GO:0005886(plasma membrane);GO:0007155(cell adhesion);GO:0007156(homophilic cell adhesion via plasma membrane adhesion molecules);GO:0016020(membrane);GO:0030534(adult behavior);GO:0050805(negative regulation of synaptic transmission);GO:0098978(glutamatergic synapse);GO:0098982(GABA-ergic synapse);GO:0099055(integral component of postsynaptic membrane);GO:0099056(…	NA	NA	NA	protocadherin 17 [Source:HGNC Symbol;Acc:HGNC:14267]	3' UTR	-0.924	-1.5	1.84	up	1.64282	0.716179	0.457422	0.529412	up	no	0.598432	0.964637	0.653721	0.438265	0.56897	0.342142
chr1	194033154	194037516	4363	ENSAPLG00000015418	ENSAPLT00000020620	6824	RUBCNL	NA	04140(Autophagy - animal);04140(Autophagy - animal)	K19330	NA	rubicon like autophagy enhancer [Source:HGNC Symbol;Acc:HGNC:20420]	Exon (ENSAPLT00000020620/ENSAPLG00000015418, exon 4 of 16)	-2.22	-3.17	-0.457	down	2.88707	1.52961	8.20667e-05	0.000205715	up	yes	8.46959	8.23161	7.6179	2.31691	2.70644	3.4001
chr1	194115958	194116077	120	ENSAPLG00000000904	ENSAPLT00000032004	20610	LCP1	GO:0001725(stress fiber);GO:0001726(ruffle);GO:0001891(phagocytic cup);GO:0002102(podosome);GO:0002286(T cell activation involved in immune response);GO:0005178(integrin binding);GO:0005509(calcium ion binding);GO:0005515(protein binding);GO:0005737(cytoplasm);GO:0005829(cytosol);GO:0005884(actin filament);GO:0005886(plasma membrane);GO:0005925(focal adhesion);GO:0010737(protein kinase A signalin…	NA	NA	NA	lymphocyte cytosolic protein 1 [Source:HGNC Symbol;Acc:HGNC:6528]	Exon (ENSAPLT00000032004/ENSAPLG00000000904, exon 8 of 16)	-0.653	-1.1	-0.996	down	1.70919	0.773314	0.244455	0.310074	up	no	4.52873	4.37231	5.38089	3.16801	1.51951	3.66844
chr1	194263479	194264165	687	ENSAPLG00000020494	ENSAPLT00000017229	37458	SIAH3	GO:0005515(protein binding);GO:0005634(nucleus);GO:0005739(mitochondrion);GO:0006511(ubiquitin-dependent protein catabolic process);GO:0007275(multicellular organism development);GO:0031647(regulation of protein stability);GO:1903215(negative regulation of protein targeting to mitochondrion)	NA	NA	NA	siah E3 ubiquitin protein ligase family member 3 [Source:HGNC Symbol;Acc:HGNC:30553]	3' UTR	-0.517	-0.877	-2.06	down	inf	inf	7.67875e-28	1.10731e-26	up	yes	9.83706	3.57784	6.17186	0	0	0
chr1	194264344	194264672	329	ENSAPLG00000020494	ENSAPLT00000017229	38323	SIAH3	GO:0005515(protein binding);GO:0005634(nucleus);GO:0005739(mitochondrion);GO:0006511(ubiquitin-dependent protein catabolic process);GO:0007275(multicellular organism development);GO:0031647(regulation of protein stability);GO:1903215(negative regulation of protein targeting to mitochondrion)	NA	NA	NA	siah E3 ubiquitin protein ligase family member 3 [Source:HGNC Symbol;Acc:HGNC:30553]	3' UTR	-0.295	-0.453	2.16	up	inf	inf	7.67875e-28	1.10731e-26	up	yes	9.83706	3.57784	6.17186	0	0	0
chr1	194264731	194264881	151	ENSAPLG00000020494	ENSAPLT00000017229	38710	SIAH3	GO:0005515(protein binding);GO:0005634(nucleus);GO:0005739(mitochondrion);GO:0006511(ubiquitin-dependent protein catabolic process);GO:0007275(multicellular organism development);GO:0031647(regulation of protein stability);GO:1903215(negative regulation of protein targeting to mitochondrion)	NA	NA	NA	siah E3 ubiquitin protein ligase family member 3 [Source:HGNC Symbol;Acc:HGNC:30553]	3' UTR	-0.298	-0.462	3	up	inf	inf	7.67875e-28	1.10731e-26	up	yes	9.83706	3.57784	6.17186	0	0	0
chr1	194488980	194492844	3865	ENSAPLG00000004532	ENSAPLT00000004647	30		NA	NA	NA	NA		Exon (ENSAPLT00000004647/ENSAPLG00000004532, exon 1 of 6)	-0.684	-1.15	-0.936	down	1.02089	0.0298254	0.809077	0.851118	up	no	1.45736	2.73567	3.49836	4.10248	2.60993	0.82161
chr1	194512409	194531315	18907	ENSAPLG00000004672	ENSAPLT00000023128	114670	TPT1	GO:0005654(nucleoplasm);GO:0005829(cytosol);GO:0008134(transcription factor binding);GO:0019827(stem cell population maintenance);GO:2000384(negative regulation of ectoderm development);GO:2000384(negative regulation of ectoderm development)	00564(Glycerophospholipid metabolism);00565(Ether lipid metabolism);04144(Endocytosis);04144(Endocytosis)	K01115	EC:3.1.4.4	tumor protein, translationally-controlled 1 [Source:HGNC Symbol;Acc:HGNC:12022]	Exon (ENSAPLT00000005134/ENSAPLG00000004973, exon 3 of 9)	-12.3	-14.3	-0.38	down	0.435787	-1.19831	6.8482e-06	1.97012e-05	down	yes	741.764	1421.02	1000.34	2662.13	1581.11	3015.19
chr1	194669446	194743182	73737	ENSAPLG00000020430	ENSAPLT00000044366	33180		GO:0003700(DNA-binding transcription factor activity);GO:0006355(regulation of transcription, DNA-templated);GO:0006355(regulation of transcription, DNA-templated)	NA	NA	NA		3' UTR	-0.794	-1.31	-0.899	down	0.616848	-0.697012	8.90255e-06	2.52109e-05	down	no	17.2672	17.356	22.2638	33.0918	33.7175	25.4127
chr1	195277847	195277906	60	ENSAPLG00000004957	ENSAPLT00000005150	16761	VPS36	GO:0000814(ESCRT II complex);GO:0005764(lysosome);GO:0005768(endosome);GO:0005770(late endosome);GO:0005829(cytosol);GO:0008022(protein C-terminus binding);GO:0031902(late endosome membrane);GO:0032266(phosphatidylinositol-3-phosphate binding);GO:0032509(endosome transport via multivesicular body sorting pathway);GO:0043130(ubiquitin binding)	04144(Endocytosis)	K12190	NA	vacuolar protein sorting 36 homolog [Source:HGNC Symbol;Acc:HGNC:20312]	3' UTR	-0.707	-1.18	0.839	up	0.764073	-0.388218	0.0109616	0.0193469	down	no	19.0172	18.9434	24.2645	28.1225	30.3854	22.9308
chr1	195414118	195414178	61	ENSAPLG00000004019	ENSAPLT00000004117	30	FOXO1	GO:0001227(DNA-binding transcription repressor activity, RNA polymerase II-specific);GO:0001568(blood vessel development);GO:0003677(DNA binding);GO:0003700(DNA-binding transcription factor activity);GO:0005634(nucleus);GO:0005737(cytoplasm);GO:0006355(regulation of transcription, DNA-templated);GO:0006974(cellular response to DNA damage stimulus);GO:0008013(beta-catenin binding);GO:0008134(trans…	04068(FoxO signaling pathway);04218(Cellular senescence);04910(Insulin signaling pathway);04933(AGE-RAGE signaling pathway in diabetic complications)	K07201	NA	forkhead box O1 [Source:HGNC Symbol;Acc:HGNC:3819]	Exon (ENSAPLT00000004117/ENSAPLG00000004019, exon 1 of 3)	-0.331	-0.532	-2	down	0.472619	-1.08125	0.000256673	0.000598633	down	yes	4.02886	2.29002	4.52565	7.81391	10.1171	5.01461
chr1	195836850	195837267	418	ENSAPLG00000029337	ENSAPLT00000018939	595		NA	NA	NA	NA		Exon (ENSAPLT00000018939/ENSAPLG00000029337, exon 1 of 1)	-6.03	-7.52	-0.742	down	7.36052	2.87981	6.13388e-11	3.02014e-10	up	yes	15.3969	18.0323	13.3183	1.6254	2.6803	2.04541
chr1	196725448	196725537	90	ENSAPLG00000020064	ENSAPLT00000044230	5144		NA	NA	NA	NA		Exon (ENSAPLT00000044230/ENSAPLG00000020064, exon 6 of 6)	-0.777	-1.29	-1.13	down	1.44925	0.535308	0.656095	0.71806	up	no	6.56845	9.29045	11.3218	1.14989	10.8222	6.78295
chr1	197016482	197019701	3220	ENSAPLG00000012886	ENSAPLT00000013496	0	EED	GO:0000122(negative regulation of transcription by RNA polymerase II);GO:0000978(RNA polymerase II proximal promoter sequence-specific DNA binding);GO:0001739(sex chromatin);GO:0003682(chromatin binding);GO:0005515(protein binding);GO:0005634(nucleus);GO:0005654(nucleoplasm);GO:0005829(cytosol);GO:0006349(regulation of gene expression by genetic imprinting);GO:0016571(histone methylation);GO:0035…	NA	NA	NA	embryonic ectoderm development [Source:HGNC Symbol;Acc:HGNC:3188]	Exon (ENSAPLT00000013496/ENSAPLG00000012886, exon 1 of 12)	-2.4	-3.39	0.631	up	0.995647	-0.00629341	0.447717	0.519811	down	no	10.6615	9.37443	10.8011	13.3083	10.8614	6.80221
chr1	198845383	198846309	927	ENSAPLG00000001790	ENSAPLT00000001784	12213	TSKU	GO:0005515(protein binding)	NA	NA	NA	tsukushi, small leucine rich proteoglycan [Source:HGNC Symbol;Acc:HGNC:28850]	Exon (ENSAPLT00000001784/ENSAPLG00000001790, exon 3 of 3)	-17.2	-19.4	-0.747	down	6.31643	2.65911	5.25244e-20	4.94813e-19	up	yes	40.3898	48.9854	49.0286	9.13628	7.23264	5.5428
chr1	199410290	199410938	649	ENSAPLG00000005646	ENSAPLT00000005844	14113	USP35	GO:0004843(thiol-dependent ubiquitin-specific protease activity);GO:0006511(ubiquitin-dependent protein catabolic process);GO:0016579(protein deubiquitination);GO:0036459(thiol-dependent ubiquitinyl hydrolase activity)	NA	NA	NA	ubiquitin specific peptidase 35 [Source:HGNC Symbol;Acc:HGNC:20061]	Exon (ENSAPLT00000005844/ENSAPLG00000005646, exon 10 of 11)	-0.325	-0.521	2.64	up	inf	inf	4.56547e-08	1.68895e-07	up	yes	0.485452	0.384585	0.503177	0	0	0
chr1	201375867	201375926	60	ENSAPLG00000007787	ENSAPLT00000008086	4893	PAAF1	GO:0005515(protein binding)	NA	NA	NA	proteasomal ATPase associated factor 1 [Source:HGNC Symbol;Acc:HGNC:25687]	Exon (ENSAPLT00000008086/ENSAPLG00000007787, exon 2 of 10)	-0.683	-1.15	-0.828	down	2.12964	1.09061	0.00237031	0.00472734	up	yes	36.215	34.6116	31.0228	14.9894	17.6426	15.1925
chr1	201905005	201907211	2207	ENSAPLG00000013672	ENSAPLT00000025643	59239	STIM1	GO:0005246(calcium channel regulator activity);GO:0005515(protein binding);GO:0005783(endoplasmic reticulum);GO:0030176(integral component of endoplasmic reticulum membrane);GO:0032237(activation of store-operated calcium channel activity);GO:0051924(regulation of calcium ion transport);GO:0051924(regulation of calcium ion transport)	04020(Calcium signaling pathway);04020(Calcium signaling pathway)	K16059	NA	stromal interaction molecule 1 [Source:HGNC Symbol;Acc:HGNC:11386]	Exon (ENSAPLT00000039070/ENSAPLG00000013672, exon 10 of 11)	-7.79	-9.44	-0.645	down	0.644991	-0.632649	0.00032731	0.000748996	down	no	49.1876	44.582	43.6907	55.6467	74.195	83.278
chr1	202027768	202027916	149	ENSAPLG00000000823	ENSAPLT00000000797	802	OR51E2	GO:0003707(steroid hormone receptor activity);GO:0004930(G protein-coupled receptor activity);GO:0004984(olfactory receptor activity);GO:0005886(plasma membrane);GO:0007186(G protein-coupled receptor signaling pathway);GO:0016021(integral component of membrane);GO:0043401(steroid hormone mediated signaling pathway)	NA	NA	NA	olfactory receptor family 51 subfamily E member 2 [Source:HGNC Symbol;Acc:HGNC:15195]	Exon (ENSAPLT00000000797/ENSAPLG00000000823, exon 1 of 2)	-0.264	-0.374	2.17	up	inf	inf	1	1	up	no	0	0	0.662415	0	0	0
chr1	202171279	202171368	90	ENSAPLG00000000121	ENSAPLT00000000121	0	RF00211	NA	NA	NA	NA		3' UTR	-22	-24.4	0.373	up	2.47814	1.30926	1	1	up	no	0.68339	0.525884	0.36351	0.157085	0.308916	0.168663
chr1	202182692	202182870	179	ENSAPLG00000010997	ENSAPLT00000019886	13154	RPS11	GO:0003735(structural constituent of ribosome);GO:0005622(intracellular);GO:0005840(ribosome);GO:0006412(translation);GO:0022627(cytosolic small ribosomal subunit);GO:0022627(cytosolic small ribosomal subunit)	03010(Ribosome);03010(Ribosome)	K02949	NA	ribosomal protein S11 [Source:HGNC Symbol;Acc:HGNC:10384]	Exon (ENSAPLT00000028990/ENSAPLG00000023002, exon 3 of 4)	-0.349	-0.568	1.91	up	2.27981	1.18891	0.000155366	0.000373406	up	yes	1217.87	1223.91	905.854	477.765	473.304	517.313
chr1	1321403	1321550	148	ENSAPLG00000022332	ENSAPLT00000022274	797		NA	NA	NA	NA		Exon (ENSAPLT00000022274/ENSAPLG00000022332, exon 1 of 4)	-1.01	-1.62	2.54	up	15.7864	3.98061	3.41763e-11	1.7306e-10	up	yes	13.0398	11.6729	9.5078	1.04627	0.282006	0.839439
chr1	6242512	6247033	4522	ENSAPLG00000003830	ENSAPLT00000003948	6802	SEPHS1	GO:0004756(selenide, water dikinase activity);GO:0005524(ATP binding);GO:0016260(selenocysteine biosynthetic process);GO:0042802(identical protein binding)	00450(Selenocompound metabolism)	K01008	EC:2.7.9.3	selenophosphate synthetase 1 [Source:HGNC Symbol;Acc:HGNC:19685]	Exon (ENSAPLT00000003948/ENSAPLG00000003830, exon 6 of 7)	-3.23	-4.37	-0.58	down	1.41448	0.500272	0.395017	0.467295	up	no	25.5979	22.7567	24.2854	19.3587	19.9407	12.0552
chr1	12346992	12357600	10609	ENSAPLG00000012076	ENSAPLT00000012581	90	NAPEPLD	GO:0001659(temperature homeostasis);GO:0005794(Golgi apparatus);GO:0005829(cytosol);GO:0008270(zinc ion binding);GO:0042802(identical protein binding);GO:0048874(host-mediated regulation of intestinal microbiota composition);GO:0050729(positive regulation of inflammatory response);GO:0070290(N-acylphosphatidylethanolamine-specific phospholipase D activity);GO:0070291(N-acylethanolamine metabolic …	04723(Retrograde endocannabinoid signaling)	K13985	EC:3.1.4.54	N-acyl phosphatidylethanolamine phospholipase D [Source:HGNC Symbol;Acc:HGNC:21683]	Exon (ENSAPLT00000012581/ENSAPLG00000012076, exon 1 of 5)	-1.47	-2.23	-0.763	down	3.78959	1.92204	9.51043e-09	3.79572e-08	up	yes	15.1395	12.9404	17.3131	3.74422	4.90195	3.33218
chr1	14228125	14229075	951	ENSAPLG00000007291	ENSAPLT00000007578	1048	COG5	GO:0005654(nucleoplasm);GO:0005794(Golgi apparatus);GO:0006891(intra-Golgi vesicle-mediated transport);GO:0017119(Golgi transport complex);GO:0017119(Golgi transport complex)	NA	NA	NA	component of oligomeric golgi complex 5 [Source:HGNC Symbol;Acc:HGNC:14857]	Exon (ENSAPLT00000007578/ENSAPLG00000007291, exon 1 of 22)	-0.914	-1.48	-1.08	down	1.05212	0.0732956	0.486194	0.558269	up	no	5.00975	4.24563	5.45852	5.31434	4.6849	3.98579
chr1	14386542	14386903	362	ENSAPLG00000010460	ENSAPLT00000010969	36228	LAMB1	GO:0005201(extracellular matrix structural constituent);GO:0005604(basement membrane);GO:0005606(laminin-1 complex);GO:0005607(laminin-2 complex);GO:0005615(extracellular space);GO:0021812(neuronal-glial interaction involved in cerebral cortex radial glia guided migration);GO:0030335(positive regulation of cell migration);GO:0031175(neuron projection development);GO:0034446(substrate adhesion-dep…	04512(ECM-receptor interaction);04510(Focal adhesion)	K05636	NA	laminin subunit beta 1 [Source:HGNC Symbol;Acc:HGNC:6486]	Exon (ENSAPLT00000010969/ENSAPLG00000010460, exon 29 of 33)	-4.73	-6.08	0.255	up	0.906144	-0.142188	0.0616857	0.092217	down	no	147.471	152.134	171.881	168.045	195.853	156.423
chr1	15272727	15273053	327	ENSAPLG00000016352	ENSAPLT00000017064	4010		GO:0004583(dolichyl-phosphate-glucose-glycolipid alpha-glucosyltransferase activity);GO:0005789(endoplasmic reticulum membrane);GO:0006488(dolichol-linked oligosaccharide biosynthetic process);GO:0007605(sensory perception of sound);GO:0060117(auditory receptor cell development)	00510(N-Glycan biosynthesis)	K03850	EC:2.4.1.256		Exon (ENSAPLT00000017064/ENSAPLG00000016352, exon 3 of 3)	-1.78	-2.63	-1.77	down	2.38833	1.256	0.00259915	0.00514105	up	yes	7.51373	5.93172	6.98563	2.74775	3.29487	2.51194
chr1	15328424	15329955	1532	ENSAPLG00000016414	ENSAPLT00000017137	153379	CELSR1	GO:0001736(establishment of planar polarity);GO:0001764(neuron migration);GO:0001843(neural tube closure);GO:0001942(hair follicle development);GO:0004888(transmembrane signaling receptor activity);GO:0004930(G protein-coupled receptor activity);GO:0005509(calcium ion binding);GO:0005654(nucleoplasm);GO:0005886(plasma membrane);GO:0007155(cell adhesion);GO:0007156(homophilic cell adhesion via pla…	NA	NA	NA	cadherin EGF LAG seven-pass G-type receptor 1 [Source:HGNC Symbol;Acc:HGNC:1850]	Exon (ENSAPLT00000017137/ENSAPLG00000016414, exon 34 of 36)	-1.19	-1.87	-0.561	down	109.155	6.77023	2.18867e-35	4.44842e-34	up	yes	41.9713	40.5861	56.5714	0.17927	0.330356	0.764973
chr1	15481505	15482404	900	ENSAPLG00000016414	ENSAPLT00000017137	930	CELSR1	GO:0001736(establishment of planar polarity);GO:0001764(neuron migration);GO:0001843(neural tube closure);GO:0001942(hair follicle development);GO:0004888(transmembrane signaling receptor activity);GO:0004930(G protein-coupled receptor activity);GO:0005509(calcium ion binding);GO:0005654(nucleoplasm);GO:0005886(plasma membrane);GO:0007155(cell adhesion);GO:0007156(homophilic cell adhesion via pla…	NA	NA	NA	cadherin EGF LAG seven-pass G-type receptor 1 [Source:HGNC Symbol;Acc:HGNC:1850]	Exon (ENSAPLT00000017137/ENSAPLG00000016414, exon 1 of 36)	-0.962	-1.55	-1.33	down	109.155	6.77023	2.18867e-35	4.44842e-34	up	yes	41.9713	40.5861	56.5714	0.17927	0.330356	0.764973
chr1	15722616	15723849	1234	ENSAPLG00000003665	ENSAPLT00000003805	42821	CERK	GO:0000287(magnesium ion binding);GO:0001729(ceramide kinase activity);GO:0003951(NAD+ kinase activity);GO:0006672(ceramide metabolic process);GO:0016021(integral component of membrane);GO:0016301(kinase activity)	00600(Sphingolipid metabolism)	K04715	EC:2.7.1.138	ceramide kinase [Source:HGNC Symbol;Acc:HGNC:19256]	3' UTR	-0.777	-1.29	-0.775	down	0.107162	-3.22214	4.76503e-14	3.04449e-13	down	yes	1.36682	0.958387	3.36447	13.4047	25.3613	14.3282
chr1	18779190	18779459	270	ENSAPLG00000015810	ENSAPLT00000037546	10248	ALG12	GO:0005788(endoplasmic reticulum lumen);GO:0006488(dolichol-linked oligosaccharide biosynthetic process);GO:0016757(transferase activity, transferring glycosyl groups);GO:0052824(dolichyl-pyrophosphate Man7GlcNAc2 alpha-1,6-mannosyltransferase activity);GO:0052824(dolichyl-pyrophosphate Man7GlcNAc2 alpha-1,6-mannosyltransferase activity)	00510(N-Glycan biosynthesis);00510(N-Glycan biosynthesis)	K03847	EC:2.4.1.260	ALG12, alpha-1,6-mannosyltransferase [Source:HGNC Symbol;Acc:HGNC:19358]	3' UTR	-1.97	-2.86	-0.915	down	3.71971	1.89519	6.12533e-06	1.77552e-05	up	yes	8.54536	7.60324	9.00352	2.53481	2.21623	2.01082
chr1	19108619	19110281	1663	ENSAPLG00000016454	ENSAPLT00000028527	1823	PIM3	GO:0004672(protein kinase activity);GO:0005524(ATP binding);GO:0006468(protein phosphorylation)	NA	NA	NA	Pim-3 proto-oncogene, serine/threonine kinase [Source:HGNC Symbol;Acc:HGNC:19310]	Exon (ENSAPLT00000028527/ENSAPLG00000016454, exon 5 of 9)	-3.71	-4.92	-0.381	down	0.611849	-0.708752	3.37754e-05	8.93725e-05	down	no	34.1042	39.21	36.0674	59.668	55.569	63.5352
chr1	19111528	19111926	399	ENSAPLG00000016454	ENSAPLT00000028527	178	PIM3	GO:0004672(protein kinase activity);GO:0005524(ATP binding);GO:0006468(protein phosphorylation)	NA	NA	NA	Pim-3 proto-oncogene, serine/threonine kinase [Source:HGNC Symbol;Acc:HGNC:19310]	Exon (ENSAPLT00000028527/ENSAPLG00000016454, exon 1 of 9)	-1.38	-2.12	-0.451	down	0.611849	-0.708752	3.37754e-05	8.93725e-05	down	no	34.1042	39.21	36.0674	59.668	55.569	63.5352
chr1	20655647	20692269	36623	ENSAPLG00000004968	ENSAPLT00000005223	132372	PLXNB2	GO:0001843(neural tube closure);GO:0001932(regulation of protein phosphorylation);GO:0005515(protein binding);GO:0005887(integral component of plasma membrane);GO:0007156(homophilic cell adhesion via plasma membrane adhesion molecules);GO:0007165(signal transduction);GO:0007405(neuroblast proliferation);GO:0007420(brain development);GO:0008360(regulation of cell shape);GO:0010976(positive regulat…	04360(Axon guidance)	K06821	NA	plexin B2 [Source:HGNC Symbol;Acc:HGNC:9104]	5' UTR	-0.674	-1.13	0.816	up	3.00534	1.58753	0.000230536	0.000541097	up	yes	3.37153	3.77492	6.6343	1.8161	1.86047	0.908848
chr1	23596128	23605745	9618	ENSAPLG00000030369	ENSAPLT00000024143	2740	WNT16	GO:0005102(signaling receptor binding);GO:0005576(extracellular region);GO:0005615(extracellular space);GO:0005737(cytoplasm);GO:0007275(multicellular organism development);GO:0010628(positive regulation of gene expression);GO:0014068(positive regulation of phosphatidylinositol 3-kinase signaling);GO:0016055(Wnt signaling pathway);GO:0030216(keratinocyte differentiation);GO:0043616(keratinocyte p…	04310(Wnt signaling pathway);04150(mTOR signaling pathway);04916(Melanogenesis)	K01558	NA	Wnt family member 16 [Source:HGNC Symbol;Acc:HGNC:16267]	3' UTR	-0.494	-0.835	-0.98	down	inf	inf	2.55668e-52	9.77695e-51	up	yes	14.9276	9.53646	10.2339	0	0	0
chr1	23771208	23771328	121	ENSAPLG00000000584	ENSAPLT00000000864	1283	CPED1	GO:0005783(endoplasmic reticulum)	NA	NA	NA	cadherin like and PC-esterase domain containing 1 [Source:HGNC Symbol;Acc:HGNC:26159]	Exon (ENSAPLT00000000864/ENSAPLG00000000584, exon 2 of 24)	-0.438	-0.737	-2.49	down	2.53267	1.34066	0.143872	0.19446	up	no	0.494254	0.372582	1.47081	0.269148	0.359492	0.294356
chr1	23791660	23793915	2256	ENSAPLG00000002016	ENSAPLT00000002247	13003	ING3	GO:0000812(Swr1 complex);GO:0004402(histone acetyltransferase activity);GO:0005634(nucleus);GO:0032777(Piccolo NuA4 histone acetyltransferase complex);GO:0035064(methylated histone binding);GO:0035267(NuA4 histone acetyltransferase complex);GO:0043065(positive regulation of apoptotic process);GO:0043967(histone H4 acetylation);GO:0043968(histone H2A acetylation)	NA	NA	NA	inhibitor of growth family member 3 [Source:HGNC Symbol;Acc:HGNC:14587]	Exon (ENSAPLT00000002247/ENSAPLG00000002016, exon 10 of 11)	-2.33	-3.3	-1.02	down	0.347005	-1.52697	2.32355e-08	8.89533e-08	down	yes	5.64471	6.39084	9.56002	19.6984	24.7876	17.7482
chr1	24891375	24891435	61	ENSAPLG00000004753	ENSAPLT00000042442	36595		NA	NA	NA	NA		Exon (ENSAPLT00000042442/ENSAPLG00000004753, exon 28 of 31)	-0.442	-0.744	1.16	up	0.489744	-1.0299	0.000873209	0.00186433	down	yes	0.739816	0.801074	1.67058	3.05453	1.84731	1.65561
chr1	25876833	25878209	1377	ENSAPLG00000012062	ENSAPLT00000012572	19590	TES	GO:0005829(cytosol);GO:0005886(plasma membrane);GO:0005925(focal adhesion);GO:0008270(zinc ion binding);GO:0008285(negative regulation of cell population proliferation);GO:0030054(cell junction);GO:0032991(protein-containing complex);GO:0042127(regulation of cell population proliferation)	04310(Wnt signaling pathway)	K04511	NA	testin LIM domain protein [Source:HGNC Symbol;Acc:HGNC:14620]	Exon (ENSAPLT00000012572/ENSAPLG00000012062, exon 3 of 8)	-1.43	-2.18	-0.67	down	2.08622	1.06089	0.00747332	0.0136522	up	yes	5.40597	5.89506	7.11048	3.23576	2.76193	2.82761
chr1	26548655	26548714	60	ENSAPLG00000012299	ENSAPLT00000012797	60	MDFIC	GO:0005634(nucleus);GO:0005730(nucleolus);GO:0005737(cytoplasm);GO:0042308(negative regulation of protein import into nucleus);GO:0045892(negative regulation of transcription, DNA-templated)	NA	NA	NA	MyoD family inhibitor domain containing [Source:HGNC Symbol;Acc:HGNC:28870]	5' UTR	-0.762	-1.27	1.19	up	0.299192	-1.74086	1.5393e-06	4.78138e-06	down	yes	2.20534	1.88909	4.7122	11.4615	11.2517	6.72146
chr1	30348715	30375111	26397	ENSAPLG00000023613	ENSAPLT00000044669	0	YAF2	GO:0003713(transcription coactivator activity);GO:0003714(transcription corepressor activity);GO:0005634(nucleus);GO:0005654(nucleoplasm);GO:0005829(cytosol);GO:0045892(negative regulation of transcription, DNA-templated);GO:0045893(positive regulation of transcription, DNA-templated)	NA	NA	NA	YY1 associated factor 2 [Source:HGNC Symbol;Acc:HGNC:17363]	Exon (ENSAPLT00000044669/ENSAPLG00000023613, exon 1 of 4)	-3.16	-4.29	-0.737	down	2.79666	1.48371	0.00390846	0.0075023	up	yes	21.4243	15.35	27.7748	7.42257	7.30048	8.3577
chr1	31771172	31771531	360	ENSAPLG00000010483	ENSAPLT00000030720	22952	SCAF11	GO:0000245(spliceosomal complex assembly);GO:0000375(RNA splicing, via transesterification reactions);GO:0005634(nucleus);GO:0005654(nucleoplasm);GO:0005730(nucleolus);GO:0008380(RNA splicing);GO:0016604(nuclear body)	NA	NA	NA	SR-related CTD associated factor 11 [Source:HGNC Symbol;Acc:HGNC:10784]	Exon (ENSAPLT00000030720/ENSAPLG00000010483, exon 10 of 14)	-1.76	-2.61	-0.974	down	0.59059	-0.759771	0.000995932	0.00210717	down	no	5.46776	4.90358	9.62068	14.5896	12.6124	6.64889
chr1	32030575	32034877	4303	ENSAPLG00000008807	ENSAPLT00000038159	0	SLC38A4	NA	NA	NA	NA	solute carrier family 38 member 4 [Source:HGNC Symbol;Acc:HGNC:14679]	5' UTR	-2.11	-3.04	-3.13	down	0.0255628	-5.28981	7.3594e-58	3.20615e-56	down	yes	0.867876	1.21502	0.856748	49.6851	39.3638	25.948
chr1	32175567	32175951	385	ENSAPLG00000011511	ENSAPLT00000011975	502	AMIGO2	GO:0005515(protein binding);GO:0043066(negative regulation of apoptotic process);GO:0051965(positive regulation of synapse assembly)	NA	NA	NA	adhesion molecule with Ig like domain 2 [Source:HGNC Symbol;Acc:HGNC:24073]	Exon (ENSAPLT00000011975/ENSAPLG00000011511, exon 1 of 1)	-1.63	-2.44	-1.23	down	0.528857	-0.919049	0.0241757	0.0396591	down	no	2.02139	1.50066	2.19259	3.53076	4.71417	2.5607
chr1	32743315	32744025	711	ENSAPLG00000008222	ENSAPLT00000025094	0	LRIG3	GO:0005515(protein binding);GO:0032474(otolith morphogenesis);GO:0032474(otolith morphogenesis)	NA	NA	NA	leucine rich repeats and immunoglobulin like domains 3 [Source:HGNC Symbol;Acc:HGNC:30991]	5' UTR	-1.4	-2.15	-3.91	down	1.53776	0.620828	0.260202	0.327034	up	no	4.31351	3.38258	4.33242	3.19924	2.49308	2.12979
chr1	36428855	36429423	569	ENSAPLG00000012567	ENSAPLT00000013099	60	MDM1	GO:0005634(nucleus);GO:0005813(centrosome);GO:0005814(centriole);GO:0005829(cytosol);GO:0008017(microtubule binding);GO:0045494(photoreceptor cell maintenance);GO:0046600(negative regulation of centriole replication);GO:0046600(negative regulation of centriole replication)	NA	NA	NA	Mdm1 nuclear protein [Source:HGNC Symbol;Acc:HGNC:29917]	Exon (ENSAPLT00000013099/ENSAPLG00000012567, exon 1 of 15)	-1.38	-2.11	2.15	up	1.42092	0.506828	0.604647	0.671289	up	no	2.27899	2.5951	4.69712	1.94113	2.48954	2.30525
chr1	36574240	36607432	33193	ENSAPLG00000011164	ENSAPLT00000011633	0		GO:0000122(negative regulation of transcription by RNA polymerase II);GO:0005634(nucleus);GO:0016567(protein ubiquitination);GO:0043066(negative regulation of apoptotic process);GO:0071157(negative regulation of cell cycle arrest)	04120(Ubiquitin mediated proteolysis);04068(FoxO signaling pathway);04144(Endocytosis);04110(Cell cycle);04115(p53 signaling pathway);04218(Cellular senescence);04625(C-type lectin receptor signaling pathway)	K06643	EC:2.3.2.27		5' UTR	-1.56	-2.35	-0.648	down	0.397684	-1.33031	2.22966e-07	7.6135e-07	down	yes	4.51914	4.53612	4.80067	13.1463	13.4138	8.28148
chr1	37637509	37637931	423	ENSAPLG00000016116	ENSAPLT00000016854	14917		GO:0000178(exosome (RNase complex));GO:0003723(RNA binding);GO:0005515(protein binding)	NA	NA	NA		3' UTR	-4.34	-5.65	0.73	up	0.572535	-0.804564	0.000129707	0.000315854	down	no	8.04516	8.74301	13.5291	16.8775	21.3201	14.7551
chr1	38902359	38908107	5749	ENSAPLG00000008754	ENSAPLT00000009099	92950	KCNC2	GO:0005216(ion channel activity);GO:0005249(voltage-gated potassium channel activity);GO:0005515(protein binding);GO:0006811(ion transport);GO:0006813(potassium ion transport);GO:0008076(voltage-gated potassium channel complex);GO:0016020(membrane);GO:0051260(protein homooligomerization);GO:0055085(transmembrane transport);GO:0055085(transmembrane transport)	NA	NA	NA	potassium voltage-gated channel subfamily C member 2 [Source:HGNC Symbol;Acc:HGNC:6234]	3' UTR	-1.32	-2.04	-1.52	down	1.18276	0.242161	1	1	up	no	0.421482	0.585318	0.237829	0.323235	0.346724	0.382347
chr1	38911833	38912012	180	ENSAPLG00000008754	ENSAPLT00000009099	89045	KCNC2	GO:0005216(ion channel activity);GO:0005249(voltage-gated potassium channel activity);GO:0005515(protein binding);GO:0006811(ion transport);GO:0006813(potassium ion transport);GO:0008076(voltage-gated potassium channel complex);GO:0016020(membrane);GO:0051260(protein homooligomerization);GO:0055085(transmembrane transport);GO:0055085(transmembrane transport)	NA	NA	NA	potassium voltage-gated channel subfamily C member 2 [Source:HGNC Symbol;Acc:HGNC:6234]	Exon (ENSAPLT00000009099/ENSAPLG00000008754, exon 2 of 4)	-0.718	-1.2	-2.3	down	1.18276	0.242161	1	1	up	no	0.421482	0.585318	0.237829	0.323235	0.346724	0.382347
chr1	39333249	39333636	388	ENSAPLG00000016005	ENSAPLT00000016708	32326	OSBPL8	GO:0001786(phosphatidylserine binding);GO:0005548(phospholipid transporter activity);GO:0010891(negative regulation of sequestering of triglyceride);GO:0015485(cholesterol binding);GO:0015914(phospholipid transport);GO:0030336(negative regulation of cell migration);GO:0031965(nuclear membrane);GO:0032148(activation of protein kinase B activity);GO:0045444(fat cell differentiation);GO:0046326(posi…	NA	NA	NA	oxysterol binding protein like 8 [Source:HGNC Symbol;Acc:HGNC:16396]	3' UTR	-2.84	-3.91	-1.12	down	0.314594	-1.66844	5.99092e-10	2.6824e-09	down	yes	2.34624	1.8939	3.17841	9.19745	7.51018	6.87376
chr1	39719416	39719506	91	ENSAPLG00000014346	ENSAPLT00000014963	117		NA	NA	NA	NA		Exon (ENSAPLT00000014963/ENSAPLG00000014346, exon 1 of 5)	-0.681	-1.14	0.432	up	34.4793	5.10766	1.60149e-66	9.72668e-65	up	yes	386.18	432.272	381.799	9.85991	11.8802	13.0707
chr1	42005522	42005579	58	ENSAPLG00000001022	ENSAPLT00000001002	3826	SNU13	GO:0000398(mRNA splicing, via spliceosome);GO:0001651(dense fibrillar component);GO:0003723(RNA binding);GO:0005634(nucleus);GO:0005690(U4atac snRNP);GO:0005730(nucleolus);GO:0007338(single fertilization);GO:0030515(snoRNA binding);GO:0030621(U4 snRNA binding);GO:0030622(U4atac snRNA binding);GO:0031428(box C/D snoRNP complex);GO:0032991(protein-containing complex);GO:0034511(U3 snoRNA binding);G…	03040(Spliceosome);03008(Ribosome biogenesis in eukaryotes)	K12845	NA	small nuclear ribonucleoprotein 13 [Source:HGNC Symbol;Acc:HGNC:7819]	Exon (ENSAPLT00000001002/ENSAPLG00000001022, exon 3 of 3)	-1.56	-2.36	0.515	up	2.29911	1.20108	8.2093e-05	0.000205731	up	yes	317.641	238.643	234.521	131.355	105.145	107.462
chr1	42717776	42726317	8542	ENSAPLG00000002466	ENSAPLT00000041408	0	ATF7IP	GO:0000122(negative regulation of transcription by RNA polymerase II);GO:0003677(DNA binding);GO:0003714(transcription corepressor activity);GO:0005515(protein binding);GO:0005634(nucleus);GO:0005654(nucleoplasm);GO:0005667(transcription factor complex);GO:0005829(cytosol);GO:0006306(DNA methylation);GO:0006310(DNA recombination);GO:0015074(DNA integration);GO:0016604(nuclear body);GO:0016887(ATP…	NA	NA	NA	activating transcription factor 7 interacting protein [Source:HGNC Symbol;Acc:HGNC:20092]	5' UTR	-2.54	-3.56	-0.564	down	1.13668	0.184824	0.720998	0.776905	up	no	14.1681	11.7812	17.4951	13.7114	13.682	10.827
chr1	43432597	43432714	118	ENSAPLG00000029315	ENSAPLT00000033767	264		GO:0006396(RNA processing)	03040(Spliceosome)	K12866	NA		Exon (ENSAPLT00000033767/ENSAPLG00000029315, exon 1 of 1)	-5.25	-6.65	0.479	up	1.62606	0.701383	0.0484103	0.0742588	up	no	318.496	314.703	302.342	191.439	184.127	199.775
chr1	43448371	43448699	329	ENSAPLG00000004034	ENSAPLT00000004125	98	ART4	GO:0003956(NAD(P)+-protein-arginine ADP-ribosyltransferase activity);GO:0006471(protein ADP-ribosylation);GO:0006471(protein ADP-ribosylation)	NA	NA	NA	ADP-ribosyltransferase 4 (Dombrock blood group) [Source:HGNC Symbol;Acc:HGNC:726]	Exon (ENSAPLT00000004125/ENSAPLG00000004034, exon 1 of 2)	-0.45	-0.758	-1.16	down	0.0209209	-5.57891	3.46843e-06	1.03592e-05	down	yes	0.0839283	0	0	1.14668	1.93652	0.928503
chr1	43466783	43468961	2179	ENSAPLG00000003895	ENSAPLT00000003988	0	MGP	GO:0005509(calcium ion binding);GO:0005576(extracellular region);GO:0031012(extracellular matrix);GO:0062023(collagen-containing extracellular matrix)	NA	NA	NA	matrix Gla protein [Source:HGNC Symbol;Acc:HGNC:7060]	5' UTR	-2.09	-3.02	-0.947	down	0.0225604	-5.47007	1.33337e-46	4.14671e-45	down	yes	3.47946	7.87998	3.66847	192.43	228.915	244.776
chr1	43663430	43663490	61	ENSAPLG00000016441	ENSAPLT00000017160	39948	CNOT4	GO:0003676(nucleic acid binding);GO:0004842(ubiquitin-protein transferase activity);GO:0006511(ubiquitin-dependent protein catabolic process);GO:0030014(CCR4-NOT complex);GO:0045652(regulation of megakaryocyte differentiation);GO:0046872(metal ion binding);GO:0051865(protein autoubiquitination)	03018(RNA degradation)	K10643	EC:2.3.2.27	CCR4-NOT transcription complex subunit 4 [Source:HGNC Symbol;Acc:HGNC:7880]	Exon (ENSAPLT00000017160/ENSAPLG00000016441, exon 12 of 12)	-1.19	-1.86	-0.592	down	0.963804	-0.053189	0.160329	0.213931	down	no	21.445	20.0897	26.819	23.1095	24.7671	23.0441
chr1	43690864	43692242	1379	ENSAPLG00000016441	ENSAPLT00000017160	11196	CNOT4	GO:0003676(nucleic acid binding);GO:0004842(ubiquitin-protein transferase activity);GO:0006511(ubiquitin-dependent protein catabolic process);GO:0030014(CCR4-NOT complex);GO:0045652(regulation of megakaryocyte differentiation);GO:0046872(metal ion binding);GO:0051865(protein autoubiquitination)	03018(RNA degradation)	K10643	EC:2.3.2.27	CCR4-NOT transcription complex subunit 4 [Source:HGNC Symbol;Acc:HGNC:7880]	Exon (ENSAPLT00000017160/ENSAPLG00000016441, exon 4 of 12)	-1.05	-1.68	0.747	up	0.963804	-0.053189	0.160329	0.213931	down	no	21.445	20.0897	26.819	23.1095	24.7671	23.0441
chr1	44310548	44310607	60	ENSAPLG00000012204	ENSAPLT00000012743	30	ACTR6	GO:0005634(nucleus);GO:0006338(chromatin remodeling)	NA	NA	NA	ARP6 actin related protein 6 homolog [Source:HGNC Symbol;Acc:HGNC:24025]	5' UTR	-0.283	-0.423	-1.68	down	0.880057	-0.18433	0.119333	0.165562	down	no	32.593	32.6242	39.0755	22.4987	52.2469	43.7612
chr1	45762471	45762649	179	ENSAPLG00000002810	ENSAPLT00000002842	16662	ELK3	GO:0000978(RNA polymerase II proximal promoter sequence-specific DNA binding);GO:0001227(DNA-binding transcription repressor activity, RNA polymerase II-specific);GO:0001228(DNA-binding transcription activator activity, RNA polymerase II-specific);GO:0001525(angiogenesis);GO:0003677(DNA binding);GO:0003700(DNA-binding transcription factor activity);GO:0005634(nucleus);GO:0005654(nucleoplasm);GO:0…	NA	NA	NA	ELK3, ETS transcription factor [Source:HGNC Symbol;Acc:HGNC:3325]	3' UTR	-1.42	-2.17	0.867	up	0.929674	-0.105203	0.124785	0.172039	down	no	21.3657	24.2905	24.5619	25.121	27.3555	23.0532
chr1	46713763	46713880	118	ENSAPLG00000015057	ENSAPLT00000015680	4492	MRPL42	GO:0005739(mitochondrion);GO:0005762(mitochondrial large ribosomal subunit);GO:0005763(mitochondrial small ribosomal subunit);GO:0005886(plasma membrane)	NA	NA	NA	mitochondrial ribosomal protein L42 [Source:HGNC Symbol;Acc:HGNC:14493]	Exon (ENSAPLT00000015680/ENSAPLG00000015057, exon 4 of 5)	-1.48	-2.25	0.512	up	1.0143	0.0204858	0.40647	0.478487	up	no	58.073	56.1253	56.9474	70.8615	49.706	48.1651
chr1	48837765	48837914	150	ENSAPLG00000013102	ENSAPLT00000045080	0	TMTC3	GO:0000030(mannosyltransferase activity);GO:0005515(protein binding);GO:0005783(endoplasmic reticulum);GO:0034976(response to endoplasmic reticulum stress);GO:0035269(protein O-linked mannosylation);GO:1901800(positive regulation of proteasomal protein catabolic process);GO:1901800(positive regulation of proteasomal protein catabolic process)	NA	NA	NA	transmembrane and tetratricopeptide repeat containing 3 [Source:HGNC Symbol;Acc:HGNC:26899]	5' UTR	-0.81	-1.34	1.94	up	1.60854	0.685751	0.205284	0.266042	up	no	3.87264	3.46755	6.49788	3.92028	2.5604	2.1222
chr1	52079135	52079315	181	ENSAPLG00000010243	ENSAPLT00000010689	17001	XPNPEP3	GO:0003094(glomerular filtration);GO:0004177(aminopeptidase activity);GO:0005737(cytoplasm);GO:0005739(mitochondrion);GO:0006508(proteolysis);GO:0016485(protein processing);GO:0030145(manganese ion binding);GO:0042803(protein homodimerization activity);GO:0070006(metalloaminopeptidase activity);GO:0070006(metalloaminopeptidase activity)	NA	NA	NA	X-prolyl aminopeptidase 3 [Source:HGNC Symbol;Acc:HGNC:28052]	3' UTR	-2.17	-3.11	-0.789	down	1.57866	0.658699	0.246834	0.31286	up	no	18.506	17.8782	19.1423	7.5123	11.0082	16.6528
chr1	52343721	52343870	150	ENSAPLG00000009347	ENSAPLT00000017762	43859	TNRC6B	GO:0003676(nucleic acid binding);GO:0031047(gene silencing by RNA);GO:0035278(miRNA mediated inhibition of translation);GO:0060213(positive regulation of nuclear-transcribed mRNA poly(A) tail shortening);GO:1900153(positive regulation of nuclear-transcribed mRNA catabolic process, deadenylation-dependent decay);GO:1900153(positive regulation of nuclear-transcribed mRNA catabolic process, deadenyl…	NA	NA	NA	trinucleotide repeat containing 6B [Source:HGNC Symbol;Acc:HGNC:29190]	Exon (ENSAPLT00000017762/ENSAPLG00000009347, exon 5 of 23)	-0.626	-1.06	-0.83	down	1.21409	0.279879	0.960468	0.971192	up	no	5.71663	4.25927	7.34585	4.61039	5.95823	3.69862
chr1	52919946	52922662	2717	ENSAPLG00000028832	ENSAPLT00000020884	7233	SYNGR1	GO:0016020(membrane);GO:0048169(regulation of long-term neuronal synaptic plasticity);GO:0048172(regulation of short-term neuronal synaptic plasticity);GO:1990830(cellular response to leukemia inhibitory factor)	04010(MAPK signaling pathway);04620(Toll-like receptor signaling pathway);04621(NOD-like receptor signaling pathway);05168(Herpes simplex infection)	K04403	NA	synaptogyrin 1 [Source:HGNC Symbol;Acc:HGNC:11498]	Exon (ENSAPLT00000020884/ENSAPLG00000028832, exon 3 of 4)	-3.2	-4.34	-0.563	down	12.9572	3.69568	1.14389e-30	1.83681e-29	up	yes	198.823	139.812	124.113	13.1398	10.575	11.9989
chr1	53104201	53104440	240	ENSAPLG00000014138	ENSAPLT00000046932	0	GTPBP1	GO:0003924(GTPase activity);GO:0005525(GTP binding);GO:0005525(GTP binding)	NA	NA	NA	GTP binding protein 1 [Source:HGNC Symbol;Acc:HGNC:4669]	5' UTR	-5.79	-7.26	-0.665	down	2.02913	1.02086	0.00116893	0.00244663	up	yes	159.324	150.967	134.415	67.3489	73.2321	78.5795
chr1	53324843	53325080	238	ENSAPLG00000015350	ENSAPLT00000017616	4114	ANKRD54	GO:0005515(protein binding);GO:0005634(nucleus);GO:0005737(cytoplasm);GO:0006913(nucleocytoplasmic transport);GO:0019887(protein kinase regulator activity);GO:0030496(midbody);GO:0044877(protein-containing complex binding);GO:0045648(positive regulation of erythrocyte differentiation);GO:0045859(regulation of protein kinase activity);GO:1902531(regulation of intracellular signal transduction);GO:…	NA	NA	NA	ankyrin repeat domain 54 [Source:HGNC Symbol;Acc:HGNC:25185]	3' UTR	-5.88	-7.35	0.609	up	1.47755	0.563208	0.199538	0.25977	up	no	52.0846	56.0747	55.313	34.9074	34.7878	40.9421
chr1	53472811	53473465	655	ENSAPLG00000020808	ENSAPLT00000031484	1525	PDXP	GO:0000287(magnesium ion binding);GO:0004721(phosphoprotein phosphatase activity);GO:0005829(cytosol);GO:0005886(plasma membrane);GO:0005911(cell-cell junction);GO:0006470(protein dephosphorylation);GO:0007088(regulation of mitotic nuclear division);GO:0015629(actin cytoskeleton);GO:0016791(phosphatase activity);GO:0030027(lamellipodium);GO:0030496(midbody);GO:0030836(positive regulation of actin…	00750(Vitamin B6 metabolism)	K07758	EC:3.1.3.74	pyridoxal phosphatase [Source:HGNC Symbol;Acc:HGNC:30259]	3' UTR	-1.47	-2.23	-0.323	down	3.05943	1.61326	1.55187e-07	5.39679e-07	up	yes	38.499	32.5636	33.7787	10.9591	10.4831	12.8261
chr1	53475391	53476417	1027	ENSAPLG00000015783	ENSAPLT00000016460	5016		GO:0005515(protein binding);GO:0005737(cytoplasm);GO:0007165(signal transduction)	NA	NA	NA		3' UTR	-2.66	-3.7	-0.744	down	6.76023	2.75707	1.48456e-09	6.38669e-09	up	yes	10.3826	7.29375	8.79475	0.733271	1.75125	1.43119
chr1	53477953	53478464	512	ENSAPLG00000015783	ENSAPLT00000016460	2969		GO:0005515(protein binding);GO:0005737(cytoplasm);GO:0007165(signal transduction)	NA	NA	NA		Exon (ENSAPLT00000016460/ENSAPLG00000015783, exon 7 of 18)	-1.33	-2.05	-2.23	down	6.76023	2.75707	1.48456e-09	6.38669e-09	up	yes	10.3826	7.29375	8.79475	0.733271	1.75125	1.43119
chr1	53761586	53763043	1458	ENSAPLG00000030290	ENSAPLT00000001625	5696	KCTD17	GO:0005515(protein binding);GO:0051260(protein homooligomerization)	NA	NA	NA	potassium channel tetramerization domain containing 17 [Source:HGNC Symbol;Acc:HGNC:25705]	Exon (ENSAPLT00000001625/ENSAPLG00000030290, exon 6 of 7)	-4.56	-5.89	-1.01	down	9.68448	3.27568	4.13843e-13	2.47994e-12	up	yes	23.7348	21.2939	20.7713	1.22709	2.37668	3.1906
chr1	54361244	54364444	3201	ENSAPLG00000008336	ENSAPLT00000008763	13854	TOM1	GO:0005737(cytoplasm);GO:0005768(endosome);GO:0005769(early endosome);GO:0005829(cytosol);GO:0006886(intracellular protein transport);GO:0016020(membrane);GO:0030276(clathrin binding)	04142(Lysosome)	K12404	NA	target of myb1 membrane trafficking protein [Source:HGNC Symbol;Acc:HGNC:11982]	Exon (ENSAPLT00000008763/ENSAPLG00000008336, exon 9 of 14)	-17.6	-19.8	-1.04	down	1.04294	0.0606563	0.428962	0.501078	up	no	48.6469	46.7152	37.5759	43.4623	38.1163	45.8861
chr1	55584992	55588653	3662	ENSAPLG00000009119	ENSAPLT00000009517	158502	BTBD11	GO:0005515(protein binding);GO:0046982(protein heterodimerization activity);GO:0060395(SMAD protein signal transduction);GO:0060395(SMAD protein signal transduction)	NA	NA	NA	BTB domain containing 11 [Source:HGNC Symbol;Acc:HGNC:23844]	Exon (ENSAPLT00000009517/ENSAPLG00000009119, exon 16 of 17)	-0.626	-1.06	0.598	up	9.57113	3.25869	2.61559e-21	2.65546e-20	up	yes	34.0141	38.3196	38.5526	2.76673	3.56516	5.25362
chr1	55746706	55747155	450	ENSAPLG00000009119	ENSAPLT00000009517	0	BTBD11	GO:0005515(protein binding);GO:0046982(protein heterodimerization activity);GO:0060395(SMAD protein signal transduction);GO:0060395(SMAD protein signal transduction)	NA	NA	NA	BTB domain containing 11 [Source:HGNC Symbol;Acc:HGNC:23844]	Exon (ENSAPLT00000009517/ENSAPLG00000009119, exon 1 of 17)	-1.17	-1.84	-0.742	down	9.57113	3.25869	2.61559e-21	2.65546e-20	up	yes	34.0141	38.3196	38.5526	2.76673	3.56516	5.25362
chr1	59125083	59125231	149	ENSAPLG00000016319	ENSAPLT00000017033	0	SLC37A3	GO:0005829(cytosol);GO:0016021(integral component of membrane);GO:0022857(transmembrane transporter activity);GO:0030176(integral component of endoplasmic reticulum membrane);GO:0055085(transmembrane transport)	NA	NA	NA	solute carrier family 37 member 3 [Source:HGNC Symbol;Acc:HGNC:20651]	5' UTR	-4.88	-6.25	-1.29	down	2.27414	1.18532	0.00233939	0.0046738	up	yes	20.2208	16.3204	18.8011	6.38945	9.42837	8.51767
chr1	59631952	59632191	240	ENSAPLG00000024028	ENSAPLT00000041718	150		NA	NA	NA	NA		Exon (ENSAPLT00000041718/ENSAPLG00000024028, exon 1 of 3)	-0.886	-1.45	-1.03	down	1.70837	0.772624	0.351863	0.423227	up	no	4.28872	3.60089	4.57289	2.96197	2.27255	2.06043
chr1	61862315	61862523	209	ENSAPLG00000006601	ENSAPLT00000006840	0		NA	NA	NA	NA		Exon (ENSAPLT00000006840/ENSAPLG00000006601, exon 1 of 3)	-0.657	-1.11	-0.678	down	4.4127	2.14166	0.000446024	0.000998526	up	yes	11.7135	8.81851	11.0012	2.38651	1.57316	3.18635
chr1	63590607	63590846	240	ENSAPLG00000004762	ENSAPLT00000004920	33082	DCP1B	GO:0000290(deadenylation-dependent decapping of nuclear-transcribed mRNA);GO:0005829(cytosol);GO:0008047(enzyme activator activity);GO:0043085(positive regulation of catalytic activity);GO:0043231(intracellular membrane-bounded organelle)	03018(RNA degradation)	K12611	EC:3.-.-.-	decapping mRNA 1B [Source:HGNC Symbol;Acc:HGNC:24451]	Exon (ENSAPLT00000004920/ENSAPLG00000004762, exon 7 of 9)	-1.1	-1.74	0.774	up	0.938906	-0.0909475	0.186536	0.244548	down	no	11.258	10.0825	14.9477	13.2697	13.422	11.9578
chr1	64339494	64361068	21575	ENSAPLG00000007993	ENSAPLT00000017265	73935	MICAL3	GO:0003779(actin binding);GO:0005515(protein binding);GO:0005634(nucleus);GO:0005654(nucleoplasm);GO:0005829(cytosol);GO:0005886(plasma membrane);GO:0006887(exocytosis);GO:0007010(cytoskeleton organization);GO:0016709(oxidoreductase activity, acting on paired donors, with incorporation or reduction of molecular oxygen, NAD(P)H as one donor, and incorporation of one atom of oxygen);GO:0017137(Rab …	NA	NA	NA	microtubule associated monooxygenase, calponin and LIM domain containing 3 [Source:HGNC Symbol;Acc:HGNC:24694]	Exon (ENSAPLT00000017265/ENSAPLG00000007993, exon 31 of 36)	-1.52	-2.31	-0.587	down	0.433647	-1.20541	3.67127e-05	9.67233e-05	down	yes	1.57321	0.816165	2.06706	2.56757	3.90973	3.79932
chr1	69681462	69685326	3865	ENSAPLG00000011986	ENSAPLT00000012479	139452	ETV6	GO:0000122(negative regulation of transcription by RNA polymerase II);GO:0000977(RNA polymerase II regulatory region sequence-specific DNA binding);GO:0000978(RNA polymerase II proximal promoter sequence-specific DNA binding);GO:0001228(DNA-binding transcription activator activity, RNA polymerase II-specific);GO:0003677(DNA binding);GO:0003700(DNA-binding transcription factor activity);GO:0005634…	NA	NA	NA	ETS variant 6 [Source:HGNC Symbol;Acc:HGNC:3495]	3' UTR	-3.09	-4.2	-0.32	down	2.47691	1.30854	4.43713e-06	1.30746e-05	up	yes	106.14	113.814	114.787	40.6941	46.3416	48.1089
chr1	70587064	70587631	568	ENSAPLG00000010420	ENSAPLT00000010866	106191	ATXN10	GO:0005737(cytoplasm);GO:0005829(cytosol);GO:0005886(plasma membrane);GO:0007399(nervous system development);GO:0030425(dendrite);GO:0031175(neuron projection development);GO:0043025(neuronal cell body);GO:0048471(perinuclear region of cytoplasm);GO:0060271(cilium assembly)	NA	NA	NA	ataxin 10 [Source:HGNC Symbol;Acc:HGNC:10549]	3' UTR	-1.32	-2.04	-1.01	down	3.9329	1.97559	0.00347193	0.00672311	up	yes	2.94287	1.0431	2.10596	0.509827	0.490516	0.548623
chr1	70739761	70739880	120	ENSAPLG00000010087	ENSAPLT00000010574	87912	FBLN1	GO:0001933(negative regulation of protein phosphorylation);GO:0001968(fibronectin binding);GO:0005201(extracellular matrix structural constituent);GO:0005509(calcium ion binding);GO:0005576(extracellular region);GO:0005604(basement membrane);GO:0005615(extracellular space);GO:0007162(negative regulation of cell adhesion);GO:0008022(protein C-terminus binding);GO:0016504(peptidase activator activi…	NA	NA	NA	fibulin 1 [Source:HGNC Symbol;Acc:HGNC:3600]	3' UTR	-0.815	-1.34	-2.78	down	18.456	4.20602	6.22874e-55	2.5828e-53	up	yes	35.3354	30.8602	38.2176	2.31648	1.85975	1.48119
chr1	70768847	70768966	120	ENSAPLG00000010087	ENSAPLT00000010574	58826	FBLN1	GO:0001933(negative regulation of protein phosphorylation);GO:0001968(fibronectin binding);GO:0005201(extracellular matrix structural constituent);GO:0005509(calcium ion binding);GO:0005576(extracellular region);GO:0005604(basement membrane);GO:0005615(extracellular space);GO:0007162(negative regulation of cell adhesion);GO:0008022(protein C-terminus binding);GO:0016504(peptidase activator activi…	NA	NA	NA	fibulin 1 [Source:HGNC Symbol;Acc:HGNC:3600]	Exon (ENSAPLT00000033236/ENSAPLG00000010087, exon 14 of 14)	-0.581	-0.987	-0.87	down	18.456	4.20602	6.22874e-55	2.5828e-53	up	yes	35.3354	30.8602	38.2176	2.31648	1.85975	1.48119
chr1	70872648	70874478	1831	ENSAPLG00000009727	ENSAPLT00000010126	11474	RIBC2	NA	NA	NA	NA	RIB43A domain with coiled-coils 2 [Source:HGNC Symbol;Acc:HGNC:13241]	Exon (ENSAPLT00000010126/ENSAPLG00000009727, exon 6 of 8)	-0.256	-0.349	1.81	up	inf	inf	1	1	up	no	0.566519	0.54286	0.250842	0	0	0
chr1	70928817	70928996	180	ENSAPLG00000008680	ENSAPLT00000009021	6834	FAM118A	GO:0042802(identical protein binding);GO:0042802(identical protein binding)	NA	NA	NA	family with sequence similarity 118 member A [Source:HGNC Symbol;Acc:HGNC:1313]	Exon (ENSAPLT00000009021/ENSAPLG00000008680, exon 6 of 8)	-0.631	-1.07	-0.977	down	1.16946	0.225848	0.963965	0.973964	up	no	6.93326	5.74844	4.71403	5.56713	4.82563	4.4822
chr1	74637197	74637257	61	ENSAPLG00000016438	ENSAPLT00000017157	60	KCNJ8	GO:0005242(inward rectifier potassium channel activity);GO:0006813(potassium ion transport);GO:0007507(heart development);GO:0015272(ATP-activated inward rectifier potassium channel activity);GO:0016020(membrane);GO:0016021(integral component of membrane);GO:0030016(myofibril);GO:0032496(response to lipopolysaccharide);GO:0043330(response to exogenous dsRNA);GO:0051607(defense response to virus);…	NA	NA	NA	potassium voltage-gated channel subfamily J member 8 [Source:HGNC Symbol;Acc:HGNC:6269]	5' UTR	-0.506	-0.857	-1.14	down	0.189932	-2.39645	1.56068e-12	8.84901e-12	down	yes	2.63833	3.01169	2.22044	16.6203	14.3469	10.4711
chr1	74675596	74678026	2431	ENSAPLG00000016445	ENSAPLT00000017164	39656	ABCC9	GO:0005267(potassium channel activity);GO:0005524(ATP binding);GO:0005886(plasma membrane);GO:0006813(potassium ion transport);GO:0008281(sulfonylurea receptor activity);GO:0008282(inward rectifying potassium channel);GO:0016020(membrane);GO:0016021(integral component of membrane);GO:0016887(ATPase activity);GO:0030017(sarcomere);GO:0042626(ATPase activity, coupled to transmembrane movement of su…	02010(ABC transporters)	K05033	NA	ATP binding cassette subfamily C member 9 [Source:HGNC Symbol;Acc:HGNC:60]	Exon (ENSAPLT00000017164/ENSAPLG00000016445, exon 22 of 38)	-1.18	-1.86	1.45	up	0.0478038	-4.38673	3.26291e-45	9.38428e-44	down	yes	0.428344	0.677445	0.953657	15.7866	14.7691	12.5255
chr1	76277862	76278882	1021	ENSAPLG00000003575	ENSAPLT00000003672	14295	PYROXD1	GO:0005634(nucleus);GO:0005737(cytoplasm);GO:0016491(oxidoreductase activity);GO:0030017(sarcomere);GO:0034599(cellular response to oxidative stress);GO:0055114(oxidation-reduction process)	NA	NA	NA	pyridine nucleotide-disulphide oxidoreductase domain 1 [Source:HGNC Symbol;Acc:HGNC:26162]	Exon (ENSAPLT00000003672/ENSAPLG00000003575, exon 11 of 12)	-1.49	-2.26	-1.3	down	0.66606	-0.586277	0.139003	0.188917	down	no	1.66945	1.47816	2.18811	2.04663	3.81618	2.14805
chr1	77077348	77077673	326	ENSAPLG00000001212	ENSAPLT00000001199	59711	NTF3	GO:0000187(activation of MAPK activity);GO:0002092(positive regulation of receptor internalization);GO:0005102(signaling receptor binding);GO:0005165(neurotrophin receptor binding);GO:0007169(transmembrane receptor protein tyrosine kinase signaling pathway);GO:0008083(growth factor activity);GO:0008284(positive regulation of cell population proliferation);GO:0030335(positive regulation of cell mi…	04010(MAPK signaling pathway)	K04356	NA	neurotrophin 3 [Source:HGNC Symbol;Acc:HGNC:8023]	Exon (ENSAPLT00000001199/ENSAPLG00000001212, exon 3 of 3)	-0.854	-1.4	-0.976	down	2.00263	1.00189	0.350459	0.421833	up	no	1.51712	1.09616	0.893927	0.608366	0.551045	0.591891
chr1	77077880	77077998	119	ENSAPLG00000001212	ENSAPLT00000001199	59386	NTF3	GO:0000187(activation of MAPK activity);GO:0002092(positive regulation of receptor internalization);GO:0005102(signaling receptor binding);GO:0005165(neurotrophin receptor binding);GO:0007169(transmembrane receptor protein tyrosine kinase signaling pathway);GO:0008083(growth factor activity);GO:0008284(positive regulation of cell population proliferation);GO:0030335(positive regulation of cell mi…	04010(MAPK signaling pathway)	K04356	NA	neurotrophin 3 [Source:HGNC Symbol;Acc:HGNC:8023]	Exon (ENSAPLT00000001199/ENSAPLG00000001212, exon 3 of 3)	-0.287	-0.432	1.14	up	2.00263	1.00189	0.350459	0.421833	up	no	1.51712	1.09616	0.893927	0.608366	0.551045	0.591891
chr1	77595456	77595575	120	ENSAPLG00000025430	ENSAPLT00000024983	90		NA	NA	NA	NA		Exon (ENSAPLT00000024983/ENSAPLG00000025430, exon 1 of 5)	-0.404	-0.677	2.17	up	0.123004	-3.02322	1	1	down	no	0	0.109336	0	0.342995	0	0.545885
chr1	78995387	78995537	151	ENSAPLG00000013634	ENSAPLT00000014221	8237		GO:0002080(acrosomal membrane);GO:0005215(transporter activity);GO:0005355(glucose transmembrane transporter activity);GO:0005737(cytoplasm);GO:0005886(plasma membrane);GO:0016020(membrane);GO:0016021(integral component of membrane);GO:0022857(transmembrane transporter activity);GO:0033300(dehydroascorbic acid transmembrane transporter activity);GO:0055056(D-glucose transmembrane transporter acti…	NA	NA	NA		3' UTR	-1.22	-1.91	-1.03	down	0.719524	-0.474886	0.0269305	0.0437541	down	no	6.07131	4.68252	6.47109	5.55011	9.92045	8.46877
chr1	79089142	79089262	121	ENSAPLG00000029903	ENSAPLT00000029998	418		NA	NA	NA	NA		Exon (ENSAPLT00000029998/ENSAPLG00000029903, exon 1 of 2)	-0.88	-1.44	1.98	up	1.56259	0.643939	1	1	up	no	0.41984	0.227765	0.346283	0	0	0.636052
chr1	79118633	79118932	300	ENSAPLG00000013506	ENSAPLT00000031693	13874	FOXJ2	GO:0000978(RNA polymerase II proximal promoter sequence-specific DNA binding);GO:0001228(DNA-binding transcription activator activity, RNA polymerase II-specific);GO:0001650(fibrillar center);GO:0003700(DNA-binding transcription factor activity);GO:0005634(nucleus);GO:0006355(regulation of transcription, DNA-templated);GO:0016525(negative regulation of angiogenesis);GO:0042802(identical protein b…	NA	NA	NA	forkhead box J2 [Source:HGNC Symbol;Acc:HGNC:24818]	3' UTR	-7.04	-8.62	0.406	up	0.644115	-0.63461	5.68193e-05	0.000146008	down	no	106.244	107.3	103.962	160.177	160.374	172.381
chr1	79120068	79124592	4525	ENSAPLG00000013506	ENSAPLT00000031693	8214	FOXJ2	GO:0000978(RNA polymerase II proximal promoter sequence-specific DNA binding);GO:0001228(DNA-binding transcription activator activity, RNA polymerase II-specific);GO:0001650(fibrillar center);GO:0003700(DNA-binding transcription factor activity);GO:0005634(nucleus);GO:0006355(regulation of transcription, DNA-templated);GO:0016525(negative regulation of angiogenesis);GO:0042802(identical protein b…	NA	NA	NA	forkhead box J2 [Source:HGNC Symbol;Acc:HGNC:24818]	3' UTR	-4.16	-5.44	-0.181	down	0.644115	-0.63461	5.68193e-05	0.000146008	down	no	106.244	107.3	103.962	160.177	160.374	172.381
chr1	79286136	79286282	147	ENSAPLG00000013511	ENSAPLT00000012874	36477	TAPBPL	GO:0002502(peptide antigen assembly with MHC class I protein complex);GO:0002590(negative regulation of antigen processing and presentation of peptide antigen via MHC class I);GO:0006006(glucose metabolic process);GO:0016620(oxidoreductase activity, acting on the aldehyde or oxo group of donors, NAD or NADP as acceptor);GO:0023024(MHC class I protein complex binding);GO:0044877(protein-containing…	00010(Glycolysis / Gluconeogenesis);00010(Glycolysis / Gluconeogenesis)	K00134	EC:1.2.1.12	TAP binding protein like [Source:HGNC Symbol;Acc:HGNC:30683]	5' UTR	-1.03	-1.65	-0.321	down	0.191079	-2.38776	1.76132e-20	1.70918e-19	down	yes	1651.01	1588.5	1275.79	7135.22	6585.96	9909.4
chr1	79444608	79444788	181	ENSAPLG00000015889	ENSAPLT00000016586	21813	ZNF384	GO:0003676(nucleic acid binding);GO:0003676(nucleic acid binding)	04910(Insulin signaling pathway);04910(Insulin signaling pathway)	K07192	NA	zinc finger protein 384 [Source:HGNC Symbol;Acc:HGNC:11955]	Exon (ENSAPLT00000016586/ENSAPLG00000015889, exon 8 of 8)	-1.86	-2.73	0.379	up	1.62814	0.703221	0.0597111	0.0896492	up	no	64.0752	62.6459	61.5102	34.624	37.9573	43.0302
chr1	79743602	79743752	151	ENSAPLG00000007797	ENSAPLT00000008093	8588		GO:0022857(transmembrane transporter activity);GO:0055085(transmembrane transport)	NA	NA	NA		3' UTR	-0.428	-0.719	1.21	up	1.04781	0.0673828	0.562316	0.632166	up	no	9.3115	7.22964	5.66179	7.82052	6.38112	6.98811
chr1	80778022	80778350	329	ENSAPLG00000018611	ENSAPLT00000009857	119792	PARP11	GO:0003950(NAD+ ADP-ribosyltransferase activity);GO:0016021(integral component of membrane);GO:0016021(integral component of membrane)	NA	NA	NA	poly(ADP-ribose) polymerase family member 11 [Source:HGNC Symbol;Acc:HGNC:1186]	3' UTR	-0.867	-1.42	-1.32	down	0.526504	-0.925483	0.000114039	0.000279679	down	no	6.6077	7.3182	8.83188	18.3791	17.0484	7.79683
chr1	81053602	81054214	613	ENSAPLG00000010842	ENSAPLT00000034053	13973	TULP3	GO:0001664(G protein-coupled receptor binding);GO:0001841(neural tube formation);GO:0001843(neural tube closure);GO:0005634(nucleus);GO:0005730(nucleolus);GO:0005886(plasma membrane);GO:0005929(cilium);GO:0005930(axoneme);GO:0007420(brain development);GO:0008277(regulation of G protein-coupled receptor signaling pathway);GO:0008589(regulation of smoothened signaling pathway);GO:0009952(anterior/p…	NA	NA	NA	tubby like protein 3 [Source:HGNC Symbol;Acc:HGNC:12425]	Exon (ENSAPLT00000034053/ENSAPLG00000010842, exon 9 of 10)	-0.266	-0.379	-0.959	down	2.93757	1.55462	3.07912e-05	8.17769e-05	up	yes	10.4957	14.7401	16.3719	5.24837	3.47545	5.44019
chr1	81195874	81199126	3253	ENSAPLG00000016697	ENSAPLT00000038072	0	CSTB	GO:0002020(protease binding);GO:0004866(endopeptidase inhibitor activity);GO:0004869(cysteine-type endopeptidase inhibitor activity);GO:0005615(extracellular space);GO:0005622(intracellular);GO:0005730(nucleolus);GO:0005737(cytoplasm);GO:0005829(cytosol);GO:0010466(negative regulation of peptidase activity);GO:0045861(negative regulation of proteolysis)	NA	NA	NA	cystatin B [Source:HGNC Symbol;Acc:HGNC:2482]	Exon (ENSAPLT00000038072/ENSAPLG00000016697, exon 1 of 3)	-3.56	-4.74	0.498	up	1.48964	0.574966	0.262758	0.329845	up	no	101.071	111.306	118.122	82.0956	62.0074	77.7618
chr1	81225795	81225945	151	ENSAPLG00000006014	ENSAPLT00000006245	13317	CASR	GO:0004930(G protein-coupled receptor activity);GO:0005509(calcium ion binding);GO:0005513(detection of calcium ion);GO:0005887(integral component of plasma membrane);GO:0006874(cellular calcium ion homeostasis);GO:0007186(G protein-coupled receptor signaling pathway);GO:0016021(integral component of membrane);GO:0016597(amino acid binding);GO:0042803(protein homodimerization activity);GO:0070509…	00140(Steroid hormone biosynthesis)	K00070	EC:1.1.1.145;EC:5.3.3.1	calcium sensing receptor [Source:HGNC Symbol;Acc:HGNC:1514]	Exon (ENSAPLT00000006245/ENSAPLG00000006014, exon 3 of 6)	-0.302	-0.472	2.5	up	3.51195	1.81227	0.19639	0.255994	up	no	0.409666	0.826847	0.508708	0.181004	0	0.315934
chr1	82108681	82108831	151	ENSAPLG00000005607	ENSAPLT00000005853	120	WDR3	GO:0005515(protein binding);GO:0005634(nucleus);GO:0005730(nucleolus);GO:0031965(nuclear membrane)	03008(Ribosome biogenesis in eukaryotes)	K14556	NA	WD repeat domain 3 [Source:HGNC Symbol;Acc:HGNC:12755]	5' UTR	-0.379	-0.628	-0.446	down	2.52179	1.33445	1.40285e-05	3.89157e-05	up	yes	56.05	51.3706	42.2435	19.5264	17.7725	22.0495
chr1	82158175	82158585	411	ENSAPLG00000001108	ENSAPLT00000001091	733	TENT5C	GO:0005634(nucleus);GO:0005737(cytoplasm);GO:0048255(mRNA stabilization);GO:1990817(RNA adenylyltransferase activity)	04371(Apelin signaling pathway);04810(Regulation of actin cytoskeleton);04260(Cardiac muscle contraction);04261(Adrenergic signaling in cardiomyocytes)	K05742	NA	terminal nucleotidyltransferase 5C [Source:HGNC Symbol;Acc:HGNC:24712]	Exon (ENSAPLT00000001091/ENSAPLG00000001108, exon 1 of 1)	-1.65	-2.48	-0.919	down	0.323704	-1.62725	0.000916144	0.00194794	down	yes	1.37554	0.976995	2.08609	4.93187	5.39363	3.38647
chr1	82158673	82159025	353	ENSAPLG00000001108	ENSAPLT00000001091	293	TENT5C	GO:0005634(nucleus);GO:0005737(cytoplasm);GO:0048255(mRNA stabilization);GO:1990817(RNA adenylyltransferase activity)	04371(Apelin signaling pathway);04810(Regulation of actin cytoskeleton);04260(Cardiac muscle contraction);04261(Adrenergic signaling in cardiomyocytes)	K05742	NA	terminal nucleotidyltransferase 5C [Source:HGNC Symbol;Acc:HGNC:24712]	Exon (ENSAPLT00000001091/ENSAPLG00000001108, exon 1 of 1)	-0.644	-1.09	1.11	up	0.323704	-1.62725	0.000916144	0.00194794	down	yes	1.37554	0.976995	2.08609	4.93187	5.39363	3.38647
chr1	83075565	83076126	562	ENSAPLG00000011017	ENSAPLT00000011469	8936		NA	03320(PPAR signaling pathway)	K08745	EC:6.2.1.-		Exon (ENSAPLT00000011469/ENSAPLG00000011017, exon 7 of 18)	-0.257	-0.355	1.68	up	9.5864	3.26099	0.0064407	0.0119005	up	yes	0.44516	0.669077	0.758188	0.126405	0	0.068916
chr1	83461844	83466986	5143	ENSAPLG00000011029	ENSAPLT00000011488	0	VANGL1	GO:0007275(multicellular organism development);GO:0016021(integral component of membrane);GO:0016328(lateral plasma membrane);GO:0043473(pigmentation);GO:0043473(pigmentation)	04310(Wnt signaling pathway);04310(Wnt signaling pathway)	K04510	NA	VANGL planar cell polarity protein 1 [Source:HGNC Symbol;Acc:HGNC:15512]	5' UTR	-0.867	-1.42	0.388	up	3.99822	1.99936	5.64597e-10	2.53125e-09	up	yes	12.3367	10.655	12.7914	3.39845	2.62923	2.92206
chr1	83516750	83516868	119	ENSAPLG00000009675	ENSAPLT00000010092	7609	TMEM39A	NA	NA	NA	NA	transmembrane protein 39A [Source:HGNC Symbol;Acc:HGNC:25600]	Exon (ENSAPLT00000010092/ENSAPLG00000009675, exon 8 of 8)	-0.715	-1.2	0.518	up	2.78937	1.47994	1.44711e-05	3.9993e-05	up	yes	54.8605	56.2278	41.0406	15.5788	17.9079	21.0521
chr1	85870897	85873560	2664	ENSAPLG00000015479	ENSAPLT00000023718	34531	GRAMD1C	GO:0005789(endoplasmic reticulum membrane);GO:0005886(plasma membrane);GO:0015485(cholesterol binding);GO:0071397(cellular response to cholesterol);GO:0120020(intermembrane cholesterol transfer activity);GO:0140268(endoplasmic reticulum-plasma membrane contact site);GO:0140268(endoplasmic reticulum-plasma membrane contact site)	NA	NA	NA	GRAM domain containing 1C [Source:HGNC Symbol;Acc:HGNC:25252]	3' UTR	-1.45	-2.22	-0.566	down	3.87307	1.95348	9.13321e-09	3.65789e-08	up	yes	26.399	25.8514	25.2018	4.7438	7.80992	7.4439
chr1	86163253	86163373	121	ENSAPLG00000017681	ENSAPLT00000041090	632	TAF13	GO:0005634(nucleus);GO:0005669(transcription factor TFIID complex);GO:0005730(nucleolus);GO:0006366(transcription by RNA polymerase II);GO:0008022(protein C-terminus binding);GO:0046982(protein heterodimerization activity)	03022(Basal transcription factors);05168(Herpes simplex infection)	K03127	NA	TATA-box binding protein associated factor 13 [Source:HGNC Symbol;Acc:HGNC:11546]	Exon (ENSAPLT00000041090/ENSAPLG00000017681, exon 4 of 4)	-1.44	-2.19	0.345	up	1.38603	0.470956	0.408477	0.480574	up	no	95.2829	98.2015	79.1895	65.8813	65.0438	65.8055
chr1	88143438	88144585	1148	ENSAPLG00000003829	ENSAPLT00000003921	1887	RPL24	GO:0000027(ribosomal large subunit assembly);GO:0002181(cytoplasmic translation);GO:0005737(cytoplasm);GO:0005783(endoplasmic reticulum);GO:0005829(cytosol);GO:0006412(translation);GO:0007093(mitotic cell cycle checkpoint);GO:0010458(exit from mitosis);GO:0021554(optic nerve development);GO:0022625(cytosolic large ribosomal subunit);GO:0031290(retinal ganglion cell axon guidance);GO:0042788(polys…	03010(Ribosome)	K02896	NA	ribosomal protein L24 [Source:HGNC Symbol;Acc:HGNC:10325]	Exon (ENSAPLT00000003921/ENSAPLG00000003829, exon 4 of 6)	-31.1	-33.8	0.291	up	2.05652	1.04021	0.00206088	0.00415112	up	yes	2108.21	1956.43	1707.42	881.913	823.073	1101.72
chr1	89420514	89426669	6156	ENSAPLG00000011898	ENSAPLT00000012399	127238	CBLB	GO:0001784(phosphotyrosine residue binding);GO:0004842(ubiquitin-protein transferase activity);GO:0005509(calcium ion binding);GO:0005515(protein binding);GO:0007166(cell surface receptor signaling pathway);GO:0023051(regulation of signaling);GO:0023051(regulation of signaling)	04120(Ubiquitin mediated proteolysis);04012(ErbB signaling pathway);04144(Endocytosis);04625(C-type lectin receptor signaling pathway);04910(Insulin signaling pathway);04910(Insulin signaling pathway)	K22517	EC:2.3.2.27	Cbl proto-oncogene B [Source:HGNC Symbol;Acc:HGNC:1542]	3' UTR	-1.94	-2.82	-0.799	down	0.727528	-0.458925	0.0256616	0.041877	down	no	3.38914	2.57536	2.99195	4.74818	3.91019	3.65243
chr1	90204087	90206969	2883	ENSAPLG00000005696	ENSAPLT00000005896	4935	IFT57	GO:0001843(neural tube closure);GO:0001947(heart looping);GO:0005794(Golgi apparatus);GO:0005813(centrosome);GO:0005929(cilium);GO:0005930(axoneme);GO:0006915(apoptotic process);GO:0006919(activation of cysteine-type endopeptidase activity involved in apoptotic process);GO:0007224(smoothened signaling pathway);GO:0030992(intraciliary transport particle B);GO:0032391(photoreceptor connecting ciliu…	NA	NA	NA	intraflagellar transport 57 [Source:HGNC Symbol;Acc:HGNC:17367]	Exon (ENSAPLT00000005896/ENSAPLG00000005696, exon 3 of 5)	-1.75	-2.6	-1.43	down	3.41523	1.77198	0.0333126	0.0529158	up	yes	11.3746	5.97033	5.30582	1.66626	2.55325	2.41277
chr1	91903251	91920893	17643	ENSAPLG00000012538	ENSAPLT00000013203	103782	EPHA3	GO:0004672(protein kinase activity);GO:0004713(protein tyrosine kinase activity);GO:0005003(ephrin receptor activity);GO:0005004(GPI-linked ephrin receptor activity);GO:0005515(protein binding);GO:0005524(ATP binding);GO:0005769(early endosome);GO:0005887(integral component of plasma membrane);GO:0006468(protein phosphorylation);GO:0007169(transmembrane receptor protein tyrosine kinase signaling …	NA	NA	NA	EPH receptor A3 [Source:HGNC Symbol;Acc:HGNC:3387]	Exon (ENSAPLT00000013203/ENSAPLG00000012538, exon 4 of 16)	-0.5	-0.845	-1.35	down	2.49212	1.31737	0.128808	0.176853	up	no	0.978333	1.20881	1.85203	0.285977	0.738089	0.596715
chr1	91990432	91990551	120	ENSAPLG00000012538	ENSAPLT00000013203	34124	EPHA3	GO:0004672(protein kinase activity);GO:0004713(protein tyrosine kinase activity);GO:0005003(ephrin receptor activity);GO:0005004(GPI-linked ephrin receptor activity);GO:0005515(protein binding);GO:0005524(ATP binding);GO:0005769(early endosome);GO:0005887(integral component of plasma membrane);GO:0006468(protein phosphorylation);GO:0007169(transmembrane receptor protein tyrosine kinase signaling …	NA	NA	NA	EPH receptor A3 [Source:HGNC Symbol;Acc:HGNC:3387]	Exon (ENSAPLT00000013203/ENSAPLG00000012538, exon 2 of 16)	-0.491	-0.83	-2.23	down	2.49212	1.31737	0.128808	0.176853	up	no	0.978333	1.20881	1.85203	0.285977	0.738089	0.596715
chr1	92403000	92403149	150	ENSAPLG00000014213	ENSAPLT00000014803	5644	C3orf38	GO:0005634(nucleus);GO:0043065(positive regulation of apoptotic process)	NA	NA	NA	chromosome 3 open reading frame 38 [Source:HGNC Symbol;Acc:HGNC:28384]	3' UTR	-0.751	-1.25	2.34	up	1.49006	0.575367	0.51675	0.587733	up	no	3.61452	3.04518	3.85564	1.95528	2.54532	2.5564
chr1	92415243	92415541	299	ENSAPLG00000016548	ENSAPLT00000026299	30590	ZNF654	GO:0003676(nucleic acid binding)	NA	NA	NA	zinc finger protein 654 [Source:HGNC Symbol;Acc:HGNC:25612]	Exon (ENSAPLT00000026299/ENSAPLG00000016548, exon 8 of 9)	-0.398	-0.665	1.18	up	0.720358	-0.473214	1	1	down	no	0.183795	0.058834	0.095275	0.113825	0.224873	0.13038
chr1	92635290	92636289	1000	ENSAPLG00000003083	ENSAPLT00000003143	665	TAGLN3	GO:0000122(negative regulation of transcription by RNA polymerase II);GO:0005515(protein binding);GO:0005634(nucleus);GO:0051015(actin filament binding)	NA	NA	NA	transgelin 3 [Source:HGNC Symbol;Acc:HGNC:29868]	Exon (ENSAPLT00000003143/ENSAPLG00000003083, exon 2 of 5)	-0.396	-0.661	-2.17	down	0.564901	-0.82393	0.163623	0.217595	down	no	0.520209	0.82989	1.12737	0.816297	2.41166	1.15771
chr1	92646195	92646950	756	ENSAPLG00000003049	ENSAPLT00000003085	4874	ABHD10	GO:0004553(hydrolase activity, hydrolyzing O-glycosyl compounds);GO:0005739(mitochondrion);GO:0005829(cytosol);GO:0019391(glucuronoside catabolic process)	NA	NA	NA	abhydrolase domain containing 10 [Source:HGNC Symbol;Acc:HGNC:25656]	Exon (ENSAPLT00000003085/ENSAPLG00000003049, exon 4 of 5)	-5.44	-6.88	-1.66	down	0.396615	-1.33419	0.00275988	0.00543605	down	yes	2.15964	1.90525	4.15893	6.76328	6.90558	7.06614
chr1	92695161	92695340	180	ENSAPLG00000002653	ENSAPLT00000002716	12661	PHLDB2	GO:0000226(microtubule cytoskeleton organization);GO:0005829(cytosol);GO:0005886(plasma membrane);GO:0005925(focal adhesion);GO:0010470(regulation of gastrulation);GO:0010717(regulation of epithelial to mesenchymal transition);GO:0031252(cell leading edge);GO:0045111(intermediate filament cytoskeleton);GO:0045180(basal cortex);GO:0045184(establishment of protein localization);GO:0051497(negative …	04141(Protein processing in endoplasmic reticulum);04141(Protein processing in endoplasmic reticulum)	K09486	NA	pleckstrin homology like domain family B member 2 [Source:HGNC Symbol;Acc:HGNC:29573]	Exon (ENSAPLT00000002716/ENSAPLG00000002653, exon 3 of 17)	-0.522	-0.884	-0.788	down	0.900471	-0.151248	0.221402	0.284149	down	no	2.9414	3.15229	5.4866	5.81433	4.13047	2.91546
chr1	99880609	99885002	4394	ENSAPLG00000007198	ENSAPLT00000019067	107482	ROBO2	GO:0001657(ureteric bud development);GO:0001822(kidney development);GO:0005515(protein binding);GO:0007156(homophilic cell adhesion via plasma membrane adhesion molecules);GO:0007411(axon guidance);GO:0007420(brain development);GO:0009986(cell surface);GO:0030673(axolemma);GO:0032870(cellular response to hormone stimulus);GO:0035385(Roundabout signaling pathway);GO:0042802(identical protein bindi…	NA	NA	NA	roundabout guidance receptor 2 [Source:HGNC Symbol;Acc:HGNC:10250]	Exon (ENSAPLT00000019067/ENSAPLG00000007198, exon 20 of 25)	-0.393	-0.655	-2.13	down	5.04415	2.33461	0.0766146	0.111777	up	no	1.30531	0.982951	1.53999	0	0.677769	0.0811814
chr1	105646525	105646704	180	ENSAPLG00000030333	ENSAPLT00000027064	0	ATP5PF	GO:0000276(mitochondrial proton-transporting ATP synthase complex, coupling factor F(o));GO:0005739(mitochondrion);GO:0005753(mitochondrial proton-transporting ATP synthase complex);GO:0015078(proton transmembrane transporter activity);GO:0015986(ATP synthesis coupled proton transport);GO:0016887(ATPase activity)	00190(Oxidative phosphorylation)	K02131	NA	ATP synthase peripheral stalk subunit F6 [Source:HGNC Symbol;Acc:HGNC:847]	5' UTR	-0.841	-1.38	-0.498	down	0.438695	-1.18871	1.37997e-09	5.95161e-09	down	yes	164.506	155.391	127.581	328.693	393.207	298.121
chr1	106225198	106225527	330	ENSAPLG00000008652	ENSAPLT00000009041	0		GO:0004222(metalloendopeptidase activity);GO:0006508(proteolysis);GO:0008237(metallopeptidase activity);GO:0008270(zinc ion binding);GO:0031012(extracellular matrix);GO:0031012(extracellular matrix)	NA	NA	NA		5' UTR	-2.01	-2.92	-1.01	down	1.12937	0.175521	0.743659	0.795677	up	no	10.7191	10.1786	13.0539	11.2028	11.3724	7.48711
chr1	107193501	107193648	148	ENSAPLG00000004842	ENSAPLT00000004981	3551	RWDD2B	GO:0005515(protein binding);GO:0005515(protein binding)	NA	NA	NA	RWD domain containing 2B [Source:HGNC Symbol;Acc:HGNC:1302]	Exon (ENSAPLT00000004981/ENSAPLG00000004842, exon 4 of 5)	-0.382	-0.634	-0.503	down	0.866021	-0.207526	0.393355	0.465702	down	no	3.15352	6.37817	3.75251	5.5554	5.52384	4.26013
chr1	107426259	107434714	8456	ENSAPLG00000003999	ENSAPLT00000004177	159582	GRIK1	GO:0004970(ionotropic glutamate receptor activity);GO:0005216(ion channel activity);GO:0006811(ion transport);GO:0016020(membrane);GO:0038023(signaling receptor activity);GO:0038023(signaling receptor activity)	04080(Neuroactive ligand-receptor interaction);04080(Neuroactive ligand-receptor interaction)	K05201	NA	glutamate ionotropic receptor kainate type subunit 1 [Source:HGNC Symbol;Acc:HGNC:4579]	3' UTR	-0.393	-0.654	-0.666	down	0.975167	-0.036279	0.670287	0.732118	down	no	0.701655	1.00436	0.74102	0.669141	1.3764	0.463809
chr1	108131791	108132001	211	ENSAPLG00000012791	ENSAPLT00000042001	39939	URB1	GO:0001650(fibrillar center);GO:0005730(nucleolus);GO:0005730(nucleolus)	NA	NA	NA	URB1 ribosome biogenesis homolog [Source:HGNC Symbol;Acc:HGNC:17344]	Exon (ENSAPLT00000042001/ENSAPLG00000012791, exon 34 of 35)	-0.898	-1.46	-0.789	down	1.35496	0.438254	0.636481	0.70038	up	no	1.62324	1.2756	2.19152	1.4766	1.16975	1.11047
chr1	108149634	108149813	180	ENSAPLG00000012791	ENSAPLT00000042001	22127	URB1	GO:0001650(fibrillar center);GO:0005730(nucleolus);GO:0005730(nucleolus)	NA	NA	NA	URB1 ribosome biogenesis homolog [Source:HGNC Symbol;Acc:HGNC:17344]	Exon (ENSAPLT00000042001/ENSAPLG00000012791, exon 18 of 35)	-0.54	-0.917	-1.23	down	1.35496	0.438254	0.636481	0.70038	up	no	1.62324	1.2756	2.19152	1.4766	1.16975	1.11047
chr1	109156404	109156673	270	ENSAPLG00000022692	ENSAPLT00000018173	1841		GO:0005249(voltage-gated potassium channel activity);GO:0006811(ion transport);GO:0016020(membrane)	NA	NA	NA		Exon (ENSAPLT00000018173/ENSAPLG00000022692, exon 2 of 2)	-0.321	-0.511	-2.46	down	-inf	-inf	1	1	down	no	0	0	0	1.26257	0.73283	0.370562
chr1	110529365	110529692	328	ENSAPLG00000028827	ENSAPLT00000036156	111671		GO:0005242(inward rectifier potassium channel activity);GO:0006813(potassium ion transport);GO:0015467(G-protein activated inward rectifier potassium channel activity);GO:0016020(membrane);GO:0016021(integral component of membrane)	NA	NA	NA		3' UTR	-0.267	-0.38	1.74	up	inf	inf	1	1	up	no	0	0.356057	2.07519	0	0	0
chr1	110914413	110914531	119	ENSAPLG00000015271	ENSAPLT00000020807	89592		GO:0003700(DNA-binding transcription factor activity);GO:0005515(protein binding);GO:0005634(nucleus);GO:0006355(regulation of transcription, DNA-templated);GO:0043565(sequence-specific DNA binding);GO:0043565(sequence-specific DNA binding)	NA	NA	NA		Exon (ENSAPLT00000020807/ENSAPLG00000015271, exon 3 of 8)	-0.346	-0.561	-2.42	down	0.367497	-1.4442	0.000417546	0.000938842	down	yes	0.882572	1.07009	2.11357	4.67467	3.13084	3.25916
chr1	111330693	111333366	2674	ENSAPLG00000030604	ENSAPLT00000033689	0	HMGN1	GO:0000720(pyrimidine dimer repair by nucleotide-excision repair);GO:0000785(chromatin);GO:0003682(chromatin binding);GO:0005634(nucleus);GO:0006283(transcription-coupled nucleotide-excision repair);GO:0006325(chromatin organization);GO:0006357(regulation of transcription by RNA polymerase II);GO:0010224(response to UV-B);GO:0010225(response to UV-C);GO:0031492(nucleosomal DNA binding);GO:0040034…	05168(Herpes simplex infection)	K11299	NA	high mobility group nucleosome binding domain 1 [Source:HGNC Symbol;Acc:HGNC:4984]	Exon (ENSAPLT00000033689/ENSAPLG00000030604, exon 1 of 3)	-28.8	-31.4	-2.51	down	0.382764	-1.38547	3.90615e-07	1.29557e-06	down	yes	81.325	107.526	53.8958	234.641	238.179	161.376
chr1	114353811	114354410	600	ENSAPLG00000003111	ENSAPLT00000038194	27943		GO:0004370(glycerol kinase activity);GO:0005975(carbohydrate metabolic process);GO:0006072(glycerol-3-phosphate metabolic process);GO:0016773(phosphotransferase activity, alcohol group as acceptor);GO:0016773(phosphotransferase activity, alcohol group as acceptor)	00561(Glycerolipid metabolism);03320(PPAR signaling pathway);03320(PPAR signaling pathway)	K00864	EC:2.7.1.30		3' UTR	-1.24	-1.93	-0.721	down	0.41378	-1.27306	0.000336819	0.000769734	down	yes	1.5124	1.56379	1.65947	1.80566	5.64819	3.99103
chr1	117116059	117118458	2400	ENSAPLG00000013037	ENSAPLT00000013584	145	PRDX4	GO:0005737(cytoplasm);GO:0005783(endoplasmic reticulum);GO:0005829(cytosol);GO:0007283(spermatogenesis);GO:0008584(male gonad development);GO:0016209(antioxidant activity);GO:0016491(oxidoreductase activity);GO:0019471(4-hydroxyproline metabolic process);GO:0022417(protein maturation by protein folding);GO:0030198(extracellular matrix organization);GO:0042803(protein homodimerization activity);GO…	NA	NA	NA	peroxiredoxin 4 [Source:HGNC Symbol;Acc:HGNC:17169]	Exon (ENSAPLT00000013584/ENSAPLG00000013037, exon 1 of 7)	-1.59	-2.39	0.192	up	1.80249	0.849989	0.00983999	0.0175229	up	no	144.186	150.398	140.169	83.6043	72.4414	85.1503
chr1	117855798	117856185	388	ENSAPLG00000013395	ENSAPLT00000017197	29621	MBTPS2	GO:0004222(metalloendopeptidase activity);GO:0005515(protein binding);GO:0005737(cytoplasm);GO:0006508(proteolysis);GO:0016020(membrane);GO:0031293(membrane protein intracellular domain proteolysis);GO:0051091(positive regulation of DNA-binding transcription factor activity);GO:0070977(bone maturation);GO:1990440(positive regulation of transcription from RNA polymerase II promoter in response to …	04141(Protein processing in endoplasmic reticulum)	K07765	EC:3.4.24.85	membrane bound transcription factor peptidase, site 2 [Source:HGNC Symbol;Acc:HGNC:15455]	3' UTR	-0.548	-0.933	-1.08	down	0.311602	-1.68222	0.00332167	0.00646123	down	yes	0.500993	0.271329	0.472433	1.36572	1.03006	1.59892
chr1	121117481	121118138	658	ENSAPLG00000004502	ENSAPLT00000004634	4599	BCOR	GO:0000122(negative regulation of transcription by RNA polymerase II);GO:0000415(negative regulation of histone H3-K36 methylation);GO:0000977(RNA polymerase II regulatory region sequence-specific DNA binding);GO:0001835(blastocyst hatching);GO:0003714(transcription corepressor activity);GO:0004842(ubiquitin-protein transferase activity);GO:0005515(protein binding);GO:0005634(nucleus);GO:0007507(…	NA	NA	NA	BCL6 corepressor [Source:HGNC Symbol;Acc:HGNC:20893]	Exon (ENSAPLT00000004634/ENSAPLG00000004502, exon 3 of 13)	-7.65	-9.29	-0.571	down	0.78928	-0.34139	0.00711818	0.0130472	down	no	19.4326	17.4298	22.2849	31.0614	23.0421	20.8348
chr1	123309761	123310536	776	ENSAPLG00000009814	ENSAPLT00000044187	44979	AGPAT3	GO:0005783(endoplasmic reticulum);GO:0016746(transferase activity, transferring acyl groups);GO:0042171(lysophosphatidic acid acyltransferase activity);GO:0042171(lysophosphatidic acid acyltransferase activity)	00561(Glycerolipid metabolism);00564(Glycerophospholipid metabolism);00564(Glycerophospholipid metabolism)	K13523	EC:2.3.1.51;EC:2.3.1.-	1-acylglycerol-3-phosphate O-acyltransferase 3 [Source:HGNC Symbol;Acc:HGNC:326]	3' UTR	-0.443	-0.745	-0.523	down	1.18847	0.249106	0.967673	0.976564	up	no	4.68519	3.54599	5.18211	1.55963	6.45539	3.27116
chr1	123958064	123959700	1637	ENSAPLG00000007348	ENSAPLT00000007672	38894	PDE9A	GO:0004114(3',5'-cyclic-nucleotide phosphodiesterase activity);GO:0007165(signal transduction);GO:0008081(phosphoric diester hydrolase activity);GO:0010613(positive regulation of cardiac muscle hypertrophy);GO:0042383(sarcolemma);GO:0046068(cGMP metabolic process);GO:0046069(cGMP catabolic process);GO:0047555(3',5'-cyclic-GMP phosphodiesterase activity)	00230(Purine metabolism)	K13761	EC:3.1.4.35	phosphodiesterase 9A [Source:HGNC Symbol;Acc:HGNC:8795]	Exon (ENSAPLT00000007672/ENSAPLG00000007348, exon 17 of 18)	-1.12	-1.76	-1.69	down	2.56589	1.35946	0.0085452	0.0154274	up	yes	7.39372	16.5831	12.6665	7.57039	3.73281	2.97775
chr1	123971998	123979426	7429	ENSAPLG00000007348	ENSAPLT00000007672	19168	PDE9A	GO:0004114(3',5'-cyclic-nucleotide phosphodiesterase activity);GO:0007165(signal transduction);GO:0008081(phosphoric diester hydrolase activity);GO:0010613(positive regulation of cardiac muscle hypertrophy);GO:0042383(sarcolemma);GO:0046068(cGMP metabolic process);GO:0046069(cGMP catabolic process);GO:0047555(3',5'-cyclic-GMP phosphodiesterase activity)	00230(Purine metabolism)	K13761	EC:3.1.4.35	phosphodiesterase 9A [Source:HGNC Symbol;Acc:HGNC:8795]	Exon (ENSAPLT00000007672/ENSAPLG00000007348, exon 5 of 18)	-2.8	-3.87	-1.2	down	2.56589	1.35946	0.0085452	0.0154274	up	yes	7.39372	16.5831	12.6665	7.57039	3.73281	2.97775
chr1	125728645	125728734	90	ENSAPLG00000011104	ENSAPLT00000011553	18630	NHS	GO:0002088(lens development in camera-type eye);GO:0005794(Golgi apparatus);GO:0016604(nuclear body);GO:0030054(cell junction);GO:0030154(cell differentiation)	NA	NA	NA	NHS actin remodeling regulator [Source:HGNC Symbol;Acc:HGNC:7820]	Exon (ENSAPLT00000011553/ENSAPLG00000011104, exon 5 of 7)	-0.385	-0.639	-1.1	down	3.01298	1.59119	0.034548	0.0547098	up	yes	2.49182	2.02303	3.03629	0.193286	1.59654	0.716371
chr1	126189170	126190707	1538	ENSAPLG00000012324	ENSAPLT00000012857	5368	TXLNG	GO:0005829(cytosol);GO:0010564(regulation of cell cycle process);GO:0019905(syntaxin binding);GO:0030500(regulation of bone mineralization);GO:0031965(nuclear membrane);GO:0046982(protein heterodimerization activity);GO:0051726(regulation of cell cycle)	NA	NA	NA	taxilin gamma [Source:HGNC Symbol;Acc:HGNC:18578]	Exon (ENSAPLT00000012857/ENSAPLG00000012324, exon 4 of 9)	-1.01	-1.61	-0.7	down	0.908575	-0.138323	0.35237	0.42369	down	no	5.13782	4.61667	8.2202	8.87957	7.45539	3.44843
chr1	126258726	126260819	2094	ENSAPLG00000020855	ENSAPLT00000023969	0		GO:0005509(calcium ion binding)	04978(Mineral absorption)	K14734	NA		Exon (ENSAPLT00000023969/ENSAPLG00000020855, exon 1 of 2)	-0.317	-0.503	1.75	up	660.57	9.36757	1.40221e-41	3.54849e-40	up	yes	84.1753	67.0233	102.429	0	0.383952	0
chr1	127730940	127731880	941	ENSAPLG00000012863	ENSAPLT00000013425	9444	OFD1	GO:0005515(protein binding);GO:0005813(centrosome);GO:0005814(centriole);GO:0005929(cilium);GO:0036064(ciliary basal body);GO:0042802(identical protein binding)	NA	NA	NA	OFD1, centriole and centriolar satellite protein [Source:HGNC Symbol;Acc:HGNC:2567]	Exon (ENSAPLT00000013425/ENSAPLG00000012863, exon 8 of 22)	-0.746	-1.24	-1.38	down	1.657	0.728576	0.330976	0.401613	up	no	2.77453	1.74423	4.94027	1.94743	2.46832	1.29276
chr1	129771293	129771413	121	ENSAPLG00000029599	ENSAPLT00000026770	106846	SHROOM2	GO:0005515(protein binding);GO:0030864(cortical actin cytoskeleton);GO:0032401(establishment of melanosome localization);GO:0045176(apical protein localization);GO:0051015(actin filament binding);GO:0051015(actin filament binding)	NA	NA	NA	shroom family member 2 [Source:HGNC Symbol;Acc:HGNC:630]	Exon (ENSAPLT00000026770/ENSAPLG00000029599, exon 6 of 11)	-1.13	-1.78	-1.58	down	3.25964	1.70471	1.06535e-05	2.99721e-05	up	yes	5.20912	3.55216	4.88618	1.51093	1.61364	1.06223
chr1	129793376	129793466	91	ENSAPLG00000029599	ENSAPLT00000026770	84793	SHROOM2	GO:0005515(protein binding);GO:0030864(cortical actin cytoskeleton);GO:0032401(establishment of melanosome localization);GO:0045176(apical protein localization);GO:0051015(actin filament binding);GO:0051015(actin filament binding)	NA	NA	NA	shroom family member 2 [Source:HGNC Symbol;Acc:HGNC:630]	Exon (ENSAPLT00000026770/ENSAPLG00000029599, exon 4 of 11)	-0.768	-1.28	-2.25	down	3.25964	1.70471	1.06535e-05	2.99721e-05	up	yes	5.20912	3.55216	4.88618	1.51093	1.61364	1.06223
chr1	130900785	130902048	1264	ENSAPLG00000007832	ENSAPLT00000008180	9441		GO:0003824(catalytic activity);GO:0008484(sulfuric ester hydrolase activity)	NA	NA	NA		Exon (ENSAPLT00000008180/ENSAPLG00000007832, exon 6 of 11)	-0.635	-1.07	-2.27	down	0.0574609	-4.12128	4.94539e-05	0.000128069	down	yes	0.190356	0	0.186232	3.97893	1.60668	0.9682
chr1	131227020	131232176	5157	ENSAPLG00000007610	ENSAPLT00000007925	31747		GO:0004672(protein kinase activity);GO:0004674(protein serine/threonine kinase activity);GO:0005524(ATP binding);GO:0006468(protein phosphorylation)	NA	NA	NA		Exon (ENSAPLT00000007925/ENSAPLG00000007610, exon 3 of 9)	-0.421	-0.708	-0.722	down	16.8062	4.07092	2.60969e-07	8.82287e-07	up	yes	4.93863	4.5571	5.47869	0.449907	0.127298	0.3138
chr1	132592397	132592607	211	ENSAPLG00000009880	ENSAPLT00000010288	70255		GO:0005887(integral component of plasma membrane);GO:0007155(cell adhesion);GO:0016020(membrane);GO:0042043(neurexin family protein binding);GO:0045202(synapse);GO:0050808(synapse organization)	04514(Cell adhesion molecules (CAMs))	K07378	NA		Exon (ENSAPLT00000010288/ENSAPLG00000009880, exon 5 of 5)	-0.49	-0.828	-1.05	down	2.401	1.26364	0.212053	0.273783	up	no	1.00136	0.699506	1.30588	0.192527	0.645357	0.414408
chr1	135341019	135396619	55601	ENSAPLG00000016270	ENSAPLT00000016976	33131	GUCY1A2	GO:0004383(guanylate cyclase activity);GO:0006182(cGMP biosynthetic process);GO:0009190(cyclic nucleotide biosynthetic process);GO:0010750(positive regulation of nitric oxide mediated signal transduction);GO:0016849(phosphorus-oxygen lyase activity);GO:0020037(heme binding);GO:0035556(intracellular signal transduction)	00230(Purine metabolism);04540(Gap junction);04270(Vascular smooth muscle contraction)	K12318	EC:4.6.1.2	guanylate cyclase 1 soluble subunit alpha 2 [Source:HGNC Symbol;Acc:HGNC:4684]	Exon (ENSAPLT00000016976/ENSAPLG00000016270, exon 4 of 8)	-2.31	-3.28	-0.737	down	1.32785	0.409093	0.679856	0.741002	up	no	5.42715	4.09273	4.95238	3.50739	4.01891	3.37271
chr1	135785395	135785755	361	ENSAPLG00000015302	ENSAPLT00000033314	18661	SLC35F2	GO:0016021(integral component of membrane);GO:0022857(transmembrane transporter activity);GO:0055085(transmembrane transport)	NA	NA	NA	solute carrier family 35 member F2 [Source:HGNC Symbol;Acc:HGNC:23615]	3' UTR	-0.553	-0.94	-2.17	down	inf	inf	1.63483e-16	1.24481e-15	up	yes	2.86709	1.78037	2.73762	0	0	0
chr1	135915766	135918713	2948	ENSAPLG00000014400	ENSAPLT00000015028	4544	NPAT	GO:0000083(regulation of transcription involved in G1/S transition of mitotic cell cycle);GO:0003713(transcription coactivator activity);GO:0003714(transcription corepressor activity);GO:0005515(protein binding);GO:0005634(nucleus);GO:0005654(nucleoplasm);GO:0005737(cytoplasm);GO:0008022(protein C-terminus binding);GO:0010468(regulation of gene expression);GO:0015030(Cajal body);GO:0045893(positi…	NA	NA	NA	nuclear protein, coactivator of histone transcription [Source:HGNC Symbol;Acc:HGNC:7896]	Exon (ENSAPLT00000015028/ENSAPLG00000014400, exon 3 of 16)	-1.94	-2.83	-2.1	down	0.691844	-0.531482	0.00286327	0.0056236	down	no	6.11529	5.04256	7.38353	9.76874	7.9678	9.06343
chr1	137423848	137424387	540	ENSAPLG00000026864	ENSAPLT00000039169	0	NA	NA	NA	NA	NA	NA	Exon (ENSAPLT00000039169/ENSAPLG00000026864, exon 1 of 1)	-0.398	-0.664	1.02	up	1	0	1	1	no	no	NA	NA	NA	NA	NA	NA
chr1	137618753	137619778	1026	ENSAPLG00000003163	ENSAPLT00000003217	2689	EEF1AKMT1	GO:0003676(nucleic acid binding);GO:0008168(methyltransferase activity);GO:0016279(protein-lysine N-methyltransferase activity);GO:0018022(peptidyl-lysine methylation);GO:0032259(methylation);GO:0032259(methylation)	NA	NA	NA	EEF1A lysine methyltransferase 1 [Source:HGNC Symbol;Acc:HGNC:27351]	3' UTR	-0.623	-1.05	-1.06	down	8.46141	3.0809	1.08101e-10	5.2083e-10	up	yes	29.3416	21.8679	20.4484	4.27981	2.12908	2.0599
chr1	137733156	137734319	1164	ENSAPLG00000006486	ENSAPLT00000006728	34897	LATS2	GO:0000082(G1/S transition of mitotic cell cycle);GO:0000922(spindle pole);GO:0004672(protein kinase activity);GO:0004674(protein serine/threonine kinase activity);GO:0005515(protein binding);GO:0005524(ATP binding);GO:0005634(nucleus);GO:0005815(microtubule organizing center);GO:0005829(cytosol);GO:0006468(protein phosphorylation);GO:0009755(hormone-mediated signaling pathway);GO:0035329(hippo s…	NA	NA	NA	large tumor suppressor kinase 2 [Source:HGNC Symbol;Acc:HGNC:6515]	Exon (ENSAPLT00000006728/ENSAPLG00000006486, exon 6 of 7)	-0.786	-1.3	-0.423	down	0.29063	-1.78274	3.33677e-13	2.01122e-12	down	yes	4.30874	3.15559	6.00507	16.9722	17.4685	11.9047
chr1	138862893	138863043	151	ENSAPLG00000012626	ENSAPLT00000040057	18247	SACS	GO:0005515(protein binding);GO:0005634(nucleus);GO:0005737(cytoplasm);GO:0005739(mitochondrion);GO:0030544(Hsp70 protein binding);GO:0051087(chaperone binding);GO:0070628(proteasome binding);GO:0090084(negative regulation of inclusion body assembly)	NA	NA	NA	sacsin molecular chaperone [Source:HGNC Symbol;Acc:HGNC:10519]	5' UTR	-0.607	-1.03	4.32	up	0.673903	-0.569388	0.095319	0.135747	down	no	0.193668	0.308388	0.366798	0.576728	0.43575	0.276809
chr1	139019565	139027946	8382	ENSAPLG00000012053	ENSAPLT00000029180	87469	MIPEP	GO:0004222(metalloendopeptidase activity);GO:0005739(mitochondrion);GO:0005759(mitochondrial matrix);GO:0006508(proteolysis);GO:0006627(protein processing involved in protein targeting to mitochondrion);GO:0008237(metallopeptidase activity)	NA	NA	NA	mitochondrial intermediate peptidase [Source:HGNC Symbol;Acc:HGNC:7104]	3' UTR	-4.02	-5.28	-0.735	down	1.3798	0.464463	0.401375	0.473244	up	no	19.289	23.1236	21.0627	15.6088	15.311	15.0833
chr1	140647604	140653830	6227	ENSAPLG00000006689	ENSAPLT00000027530	60944	FLT1	GO:0002548(monocyte chemotaxis);GO:0004672(protein kinase activity);GO:0004713(protein tyrosine kinase activity);GO:0004714(transmembrane receptor protein tyrosine kinase activity);GO:0005021(vascular endothelial growth factor-activated receptor activity);GO:0005524(ATP binding);GO:0005886(plasma membrane);GO:0005887(integral component of plasma membrane);GO:0006468(protein phosphorylation);GO:00…	04010(MAPK signaling pathway);04510(Focal adhesion)	K05096	EC:2.7.10.1	fms related tyrosine kinase 1 [Source:HGNC Symbol;Acc:HGNC:3763]	Exon (ENSAPLT00000027530/ENSAPLG00000006689, exon 12 of 30)	-1.53	-2.32	-0.7	down	0.0949021	-3.39742	1.60167e-34	3.12024e-33	down	yes	1.89066	1.37162	2.99052	21.3156	26.9402	17.631
chr1	141301200	141301349	150	ENSAPLG00000030014	ENSAPLT00000018889	48402	HMGB1	GO:0000122(negative regulation of transcription by RNA polymerase II);GO:0000793(condensed chromosome);GO:0001530(lipopolysaccharide binding);GO:0001654(eye development);GO:0001773(myeloid dendritic cell activation);GO:0001786(phosphatidylserine binding);GO:0001934(positive regulation of protein phosphorylation);GO:0001935(endothelial cell proliferation);GO:0002218(activation of innate immune res…	03410(Base excision repair);04140(Autophagy - animal);04217(Necroptosis);04217(Necroptosis)	K10802	NA	high mobility group box 1 [Source:HGNC Symbol;Acc:HGNC:4983]	3' UTR	-0.296	-0.456	2.58	up	2.59995	1.37849	0.000136619	0.000331046	up	yes	121.028	117.943	133.552	38.5409	75.6814	29.0583
chr1	143952010	143952219	210	ENSAPLG00000018313	ENSAPLT00000025179	387	SPART	GO:0005737(cytoplasm);GO:0005741(mitochondrial outer membrane);GO:0005811(lipid droplet);GO:0005829(cytosol);GO:0005886(plasma membrane);GO:0009838(abscission);GO:0030496(midbody);GO:0030514(negative regulation of BMP signaling pathway);GO:0031625(ubiquitin protein ligase binding);GO:0034389(lipid droplet organization);GO:0045202(synapse);GO:0048698(negative regulation of collateral sprouting in …	04144(Endocytosis)	K19366	NA	spartin [Source:HGNC Symbol;Acc:HGNC:18514]	Exon (ENSAPLT00000025179/ENSAPLG00000018313, exon 1 of 8)	-0.665	-1.12	-0.59	down	0.417202	-1.26118	1.88791e-05	5.13507e-05	down	yes	3.91698	2.92927	4.92479	12.4763	8.99891	6.73903
chr1	143952279	143952606	328	ENSAPLG00000018313	ENSAPLT00000025179	0	SPART	GO:0005737(cytoplasm);GO:0005741(mitochondrial outer membrane);GO:0005811(lipid droplet);GO:0005829(cytosol);GO:0005886(plasma membrane);GO:0009838(abscission);GO:0030496(midbody);GO:0030514(negative regulation of BMP signaling pathway);GO:0031625(ubiquitin protein ligase binding);GO:0034389(lipid droplet organization);GO:0045202(synapse);GO:0048698(negative regulation of collateral sprouting in …	04144(Endocytosis)	K19366	NA	spartin [Source:HGNC Symbol;Acc:HGNC:18514]	Exon (ENSAPLT00000025179/ENSAPLG00000018313, exon 1 of 8)	-1.83	-2.69	-0.889	down	0.417202	-1.26118	1.88791e-05	5.13507e-05	down	yes	3.91698	2.92927	4.92479	12.4763	8.99891	6.73903
chr1	144217479	144217778	300	ENSAPLG00000009135	ENSAPLT00000009523	14581		GO:0003700(DNA-binding transcription factor activity);GO:0005515(protein binding);GO:0005622(intracellular);GO:0005667(transcription factor complex);GO:0006355(regulation of transcription, DNA-templated);GO:0007179(transforming growth factor beta receptor signaling pathway)	04350(TGF-beta signaling pathway)	K16791	NA		5' UTR	-0.42	-0.706	-0.851	down	0.968551	-0.0461	0.662034	0.723716	down	no	1.77536	1.19055	0.757362	1.69119	0.970247	1.18273
chr1	146399934	146400561	628	ENSAPLG00000014775	ENSAPLT00000015455	109500	ATP10A	GO:0000166(nucleotide binding);GO:0000287(magnesium ion binding);GO:0004012(phospholipid-translocating ATPase activity);GO:0005524(ATP binding);GO:0005783(endoplasmic reticulum);GO:0015914(phospholipid transport);GO:0016021(integral component of membrane)	NA	NA	NA	ATPase phospholipid transporting 10A (putative) [Source:HGNC Symbol;Acc:HGNC:13542]	3' UTR	-2.74	-3.8	-1.54	down	1.06499	0.0908449	0.697027	0.756047	up	no	0.952211	0.67316	1.12373	0.55133	0.876887	1.15311
chr1	149155322	149155974	653	ENSAPLG00000012323	ENSAPLT00000023901	2903	SLC25A6	GO:0005739(mitochondrion);GO:0005743(mitochondrial inner membrane);GO:0022857(transmembrane transporter activity);GO:0055085(transmembrane transport)	04020(Calcium signaling pathway);04217(Necroptosis);04218(Cellular senescence);05164(Influenza A)	K05863	NA	solute carrier family 25 member 6 [Source:HGNC Symbol;Acc:HGNC:10992]	3' UTR	-26.9	-29.4	0.264	up	4.56993	2.19217	2.19546e-17	1.77372e-16	up	yes	832.749	803.062	785.658	171.489	182.453	175.928
chr1	149156573	149157653	1081	ENSAPLG00000012323	ENSAPLT00000023901	1224	SLC25A6	GO:0005739(mitochondrion);GO:0005743(mitochondrial inner membrane);GO:0022857(transmembrane transporter activity);GO:0055085(transmembrane transport)	04020(Calcium signaling pathway);04217(Necroptosis);04218(Cellular senescence);05164(Influenza A)	K05863	NA	solute carrier family 25 member 6 [Source:HGNC Symbol;Acc:HGNC:10992]	Exon (ENSAPLT00000023901/ENSAPLG00000012323, exon 2 of 4)	-5.79	-7.26	0.211	up	4.56993	2.19217	2.19546e-17	1.77372e-16	up	yes	832.749	803.062	785.658	171.489	182.453	175.928
chr1	149188619	149188769	151	ENSAPLG00000009849	ENSAPLT00000010285	0	ASMTL	GO:0005829(cytosol);GO:0008168(methyltransferase activity);GO:0008171(O-methyltransferase activity);GO:0047429(nucleoside-triphosphate diphosphatase activity);GO:0047429(nucleoside-triphosphate diphosphatase activity)	00380(Tryptophan metabolism);00380(Tryptophan metabolism)	K00543	EC:2.1.1.4	acetylserotonin O-methyltransferase like [Source:HGNC Symbol;Acc:HGNC:751]	5' UTR	-0.5	-0.845	0.774	up	0.425477	-1.23285	6.09066e-05	0.000155736	down	yes	1.60482	2.50041	3.48363	5.59149	5.80171	6.44293
chr1	151208003	151208092	90	ENSAPLG00000027693	ENSAPLT00000043563	684		NA	NA	NA	NA		Exon (ENSAPLT00000043563/ENSAPLG00000027693, exon 1 of 1)	-0.253	-0.342	2	up	2.2221	1.15192	1	1	up	no	0.09274	0.056491	0.337667	0	0.142528	0.076588
chr1	154695679	154696039	361	ENSAPLG00000028346	ENSAPLT00000020820	0	EFNB2	GO:0001945(lymph vessel development);GO:0002042(cell migration involved in sprouting angiogenesis);GO:0005102(signaling receptor binding);GO:0005886(plasma membrane);GO:0007155(cell adhesion);GO:0008284(positive regulation of cell population proliferation);GO:0009887(animal organ morphogenesis);GO:0010839(negative regulation of keratinocyte proliferation);GO:0010977(negative regulation of neuron …	NA	NA	NA	ephrin B2 [Source:HGNC Symbol;Acc:HGNC:3227]	5' UTR	-2.51	-3.53	-1.26	down	0.737113	-0.440043	0.0272237	0.0441837	down	no	4.46553	4.54533	6.37997	6.72396	9.01027	5.14565
chr1	158440041	158444441	4401	ENSAPLG00000021253	ENSAPLT00000033139	7587	DCUN1D2	GO:0005515(protein binding)	NA	NA	NA	defective in cullin neddylation 1 domain containing 2 [Source:HGNC Symbol;Acc:HGNC:20328]	Exon (ENSAPLT00000033139/ENSAPLG00000021253, exon 4 of 5)	-0.384	-0.638	-1.81	down	0.264435	-1.91902	2.76149e-06	8.34184e-06	down	yes	1.30987	1.41842	1.936	8.88054	4.45614	4.30206
chr1	160581559	160583375	1817	ENSAPLG00000013546	ENSAPLT00000014111	8754	C2orf49	GO:0048598(embryonic morphogenesis);GO:0072669(tRNA-splicing ligase complex);GO:0072669(tRNA-splicing ligase complex)	NA	NA	NA	chromosome 2 open reading frame 49 [Source:HGNC Symbol;Acc:HGNC:28772]	3' UTR	-0.676	-1.14	-0.722	down	0.61543	-0.700332	0.0223391	0.0370048	down	no	3.09411	2.91058	4.84727	4.68921	7.35668	5.58722
chr1	161748013	161748163	151	ENSAPLG00000005438	ENSAPLT00000005630	32244	SLC9A2	GO:0006812(cation transport);GO:0006814(sodium ion transport);GO:0006885(regulation of pH);GO:0008104(protein localization);GO:0015299(solute:proton antiporter activity);GO:0015385(sodium:proton antiporter activity);GO:0016021(integral component of membrane);GO:0055085(transmembrane transport)	NA	NA	NA	solute carrier family 9 member A2 [Source:HGNC Symbol;Acc:HGNC:11072]	Exon (ENSAPLT00000005630/ENSAPLG00000005438, exon 12 of 12)	-1.66	-2.48	3.49	up	0.386119	-1.37288	0.217749	0.280192	down	no	0.071706	0.088754	0.156012	0.440933	0.378691	0
chr1	162395068	162399055	3988	ENSAPLG00000016431	ENSAPLT00000017149	0		GO:0003735(structural constituent of ribosome);GO:0005622(intracellular);GO:0005840(ribosome);GO:0006412(translation)	03010(Ribosome)	K02910	NA		Exon (ENSAPLT00000017149/ENSAPLG00000016431, exon 1 of 4)	-59.3	-62.1	0.314	up	2.72301	1.4452	8.04132e-07	2.56492e-06	up	yes	2348.68	2505.91	2166.3	727.5	951.804	899.057
chr1	162401904	162402172	269	ENSAPLG00000016315	ENSAPLT00000032733	45698	NPAS2	GO:0003677(DNA binding);GO:0003700(DNA-binding transcription factor activity);GO:0005634(nucleus);GO:0005654(nucleoplasm);GO:0005667(transcription factor complex);GO:0005737(cytoplasm);GO:0005829(cytosol);GO:0006355(regulation of transcription, DNA-templated);GO:0045739(positive regulation of DNA repair);GO:0045893(positive regulation of transcription, DNA-templated);GO:0045944(positive regulatio…	NA	NA	NA	neuronal PAS domain protein 2 [Source:HGNC Symbol;Acc:HGNC:7895]	3' UTR	-0.432	-0.726	0.791	up	0.835228	-0.259758	0.355959	0.427357	down	no	1.33087	0.874129	1.2964	1.48782	1.95571	0.748616
chr1	162865489	162869971	4483	ENSAPLG00000011218	ENSAPLT00000011759	0	DNAJC3	GO:0004860(protein kinase inhibitor activity);GO:0005515(protein binding);GO:0005737(cytoplasm);GO:0005783(endoplasmic reticulum);GO:0005788(endoplasmic reticulum lumen);GO:0005829(cytosol);GO:0019901(protein kinase binding);GO:0034976(response to endoplasmic reticulum stress);GO:0036494(positive regulation of translation initiation in response to endoplasmic reticulum stress);GO:0043066(negative…	04141(Protein processing in endoplasmic reticulum);05164(Influenza A)	K09523	NA	DnaJ heat shock protein family (Hsp40) member C3 [Source:HGNC Symbol;Acc:HGNC:9439]	Exon (ENSAPLT00000011759/ENSAPLG00000011218, exon 1 of 12)	-2.65	-3.69	-1	down	0.911058	-0.134385	0.0827687	0.119774	down	no	38.7706	40.4464	52.6749	48.6829	56.7965	39.2883
chr1	172673529	172673797	269	ENSAPLG00000025860	ENSAPLT00000029140	8883	ENDOD1	GO:0003676(nucleic acid binding);GO:0016787(hydrolase activity);GO:0046872(metal ion binding)	NA	NA	NA	endonuclease domain containing 1 [Source:HGNC Symbol;Acc:HGNC:29129]	3' UTR	-0.678	-1.14	-0.507	down	9.11599	3.1884	8.72676e-27	1.19501e-25	up	yes	38.0179	45.2432	31.8139	3.91027	5.3918	3.32135
chr1	173578478	173578987	510	ENSAPLG00000013451	ENSAPLT00000014065	323846	FAT3	GO:0005509(calcium ion binding);GO:0005886(plasma membrane);GO:0007155(cell adhesion);GO:0007156(homophilic cell adhesion via plasma membrane adhesion molecules);GO:0016020(membrane);GO:0016020(membrane)	NA	NA	NA	FAT atypical cadherin 3 [Source:HGNC Symbol;Acc:HGNC:23112]	Exon (ENSAPLT00000014065/ENSAPLG00000013451, exon 26 of 26)	-1.58	-2.38	2.38	up	51.329	5.6817	3.83475e-09	1.59203e-08	up	yes	0.554032	0.499512	0.474964	0	0.0171091	0.0126696
chr1	174897913	174898152	240	ENSAPLG00000012368	ENSAPLT00000012920	34785	NAALAD2	GO:0004180(carboxypeptidase activity);GO:0006508(proteolysis);GO:0008233(peptidase activity);GO:0016021(integral component of membrane);GO:0042135(neurotransmitter catabolic process);GO:0050129(N-formylglutamate deformylase activity)	NA	NA	NA	N-acetylated alpha-linked acidic dipeptidase 2 [Source:HGNC Symbol;Acc:HGNC:14526]	3' UTR	-0.521	-0.883	1.64	up	0.55566	-0.847725	0.248089	0.314104	down	no	0.08538	0.291403	0.156554	0.502271	0.315915	0.14164
chr1	180643058	180643207	150	ENSAPLG00000012807	ENSAPLT00000010538	15234	BORA	GO:0072687(meiotic spindle)	NA	NA	NA	bora, aurora kinase A activator [Source:HGNC Symbol;Acc:HGNC:24724]	3' UTR	-0.39	-0.65	0.913	up	7.69771	2.94443	0.0163233	0.0278116	up	yes	2.67993	1.87283	3.15223	0	0.723772	0.277173
chr1	182995169	182995468	300	ENSAPLG00000016841	ENSAPLT00000021637	32912	AKAP11	GO:0005730(nucleolus);GO:0005829(cytosol);GO:0005886(plasma membrane)	NA	NA	NA	A-kinase anchoring protein 11 [Source:HGNC Symbol;Acc:HGNC:369]	3' UTR	-0.597	-1.01	-0.824	down	1.34216	0.424555	0.734951	0.788644	up	no	0.965712	0.656846	1.36931	1.02955	0.861309	0.338292
chr1	183011425	183011574	150	ENSAPLG00000016841	ENSAPLT00000021637	16806	AKAP11	GO:0005730(nucleolus);GO:0005829(cytosol);GO:0005886(plasma membrane)	NA	NA	NA	A-kinase anchoring protein 11 [Source:HGNC Symbol;Acc:HGNC:369]	Exon (ENSAPLT00000021637/ENSAPLG00000016841, exon 6 of 11)	-0.407	-0.682	-1.06	down	1.34216	0.424555	0.734951	0.788644	up	no	0.965712	0.656846	1.36931	1.02955	0.861309	0.338292
chr1	183530630	183536821	6192	ENSAPLG00000009514	ENSAPLT00000045248	3796	NAA16	GO:0004596(peptide alpha-N-acetyltransferase activity);GO:0005515(protein binding);GO:0005737(cytoplasm);GO:0005829(cytosol);GO:0006474(N-terminal protein amino acid acetylation);GO:0031415(NatA complex);GO:0043022(ribosome binding);GO:0043066(negative regulation of apoptotic process);GO:0050821(protein stabilization);GO:0050821(protein stabilization)	NA	NA	NA	N(alpha)-acetyltransferase 16, NatA auxiliary subunit [Source:HGNC Symbol;Acc:HGNC:26164]	Exon (ENSAPLT00000045248/ENSAPLG00000009514, exon 3 of 18)	-0.512	-0.867	1.59	up	0.21048	-2.24825	2.65926e-10	1.2274e-09	down	yes	1.29982	1.74197	2.26141	10.6755	10.0501	4.47014
chr1	183696007	183696214	208	ENSAPLG00000024638	ENSAPLT00000037436	8450	CNMD	GO:0016525(negative regulation of angiogenesis)	NA	NA	NA	chondromodulin [Source:HGNC Symbol;Acc:HGNC:17005]	3' UTR	-0.416	-0.699	2.46	up	11.0486	3.4658	1	1	up	no	0.439333	1.2066	0.466262	0	0.191173	0
chr1	192892188	192893087	900	ENSAPLG00000008269	ENSAPLT00000008580	0	ARL11	GO:0002244(hematopoietic progenitor cell differentiation);GO:0005525(GTP binding)	NA	NA	NA	ADP ribosylation factor like GTPase 11 [Source:HGNC Symbol;Acc:HGNC:24046]	Exon (ENSAPLT00000008580/ENSAPLG00000008269, exon 1 of 3)	-1.23	-1.92	-1.22	down	2.3722	1.24623	0.18587	0.243789	up	no	5.90034	3.76465	3.92708	3.20074	1.17847	1.35052
chr1	192925839	192931898	6060	ENSAPLG00000008888	ENSAPLT00000009249	5705	PHF11	GO:0005654(nucleoplasm);GO:0031965(nuclear membrane)	00310(Lysine degradation)	K18494	EC:2.1.1.43	PHD finger protein 11 [Source:HGNC Symbol;Acc:HGNC:17024]	Exon (ENSAPLT00000009249/ENSAPLG00000008888, exon 5 of 11)	-2.95	-4.04	-0.353	down	2.81899	1.49518	4.48239e-06	1.32004e-05	up	yes	36.249	31.3958	51.9293	14.3046	12.5273	15.5855
chr1	193494800	193495199	400	ENSAPLG00000021981	ENSAPLT00000029008	975	NUDT15	GO:0016787(hydrolase activity)	NA	NA	NA	nudix hydrolase 15 [Source:HGNC Symbol;Acc:HGNC:23063]	3' UTR	-2.62	-3.65	0.828	up	1.1234	0.167878	0.81623	0.856113	up	no	11.6227	12.0106	14.9045	14.0898	12.3632	7.8514
chr1	193495755	193496024	270	ENSAPLG00000021981	ENSAPLT00000029008	150	NUDT15	GO:0016787(hydrolase activity)	NA	NA	NA	nudix hydrolase 15 [Source:HGNC Symbol;Acc:HGNC:23063]	Exon (ENSAPLT00000029008/ENSAPLG00000021981, exon 1 of 4)	-1.5	-2.27	-0.891	down	1.1234	0.167878	0.81623	0.856113	up	no	11.6227	12.0106	14.9045	14.0898	12.3632	7.8514
chr1	195254448	195254627	180	ENSAPLG00000005260	ENSAPLT00000005431	6197	CKAP2	GO:0000281(mitotic cytokinesis);GO:0005813(centrosome);GO:0005829(cytosol);GO:0005881(cytoplasmic microtubule);GO:0015630(microtubule cytoskeleton);GO:0045944(positive regulation of transcription by RNA polymerase II)	NA	NA	NA	cytoskeleton associated protein 2 [Source:HGNC Symbol;Acc:HGNC:1990]	Exon (ENSAPLT00000005431/ENSAPLG00000005260, exon 4 of 9)	-0.392	-0.653	1.98	up	55.6985	5.79957	2.61933e-30	4.17354e-29	up	yes	9.11259	10.1411	18.5845	0.391923	0.17126	0.116157
chr1	198677497	198678065	569	ENSAPLG00000009988	ENSAPLT00000010395	6006		GO:0005515(protein binding)	NA	NA	NA		Exon (ENSAPLT00000010395/ENSAPLG00000009988, exon 2 of 2)	-2.19	-3.14	-0.886	down	0.881116	-0.182596	0.318339	0.38893	down	no	2.05309	2.23736	4.3395	3.62438	3.76376	2.40621
chr1	199630807	199630897	91	ENSAPLG00000004223	ENSAPLT00000031543	203109	TENM4	GO:0001702(gastrulation with mouth forming second);GO:0005634(nucleus);GO:0005737(cytoplasm);GO:0005886(plasma membrane);GO:0005887(integral component of plasma membrane);GO:0007165(signal transduction);GO:0016021(integral component of membrane);GO:0031641(regulation of myelination);GO:0031643(positive regulation of myelination);GO:0032289(central nervous system myelin formation);GO:0042803(prote…	NA	NA	NA	teneurin transmembrane protein 4 [Source:HGNC Symbol;Acc:HGNC:29945]	Exon (ENSAPLT00000031543/ENSAPLG00000004223, exon 25 of 27)	-0.458	-0.773	2.13	up	42.2074	5.39942	4.22245e-78	3.66704e-76	up	yes	15.9783	16.9091	16.431	0.34111	0.439834	0.387532
chr1	202256377	202256615	239	ENSAPLG00000009463	ENSAPLT00000024890	6398		GO:0005515(protein binding);GO:0005515(protein binding)	04120(Ubiquitin mediated proteolysis);04120(Ubiquitin mediated proteolysis)	K10260	NA		Exon (ENSAPLT00000024890/ENSAPLG00000009463, exon 11 of 11)	-3.52	-4.7	-0.407	down	1.13525	0.183015	0.712607	0.769228	up	no	62.4071	65.2841	65.5522	55.3447	58.9485	55.9272
chr1	202295435	202296297	863	ENSAPLG00000024979	ENSAPLT00000036592	19071		GO:0005509(calcium ion binding);GO:0005886(plasma membrane);GO:0007155(cell adhesion);GO:0007156(homophilic cell adhesion via plasma membrane adhesion molecules);GO:0016020(membrane);GO:0016020(membrane)	NA	NA	NA		Exon (ENSAPLT00000036592/ENSAPLG00000024979, exon 4 of 5)	-1.23	-1.92	-0.37	down	6.34632	2.66592	6.35124e-23	7.11243e-22	up	yes	33.4024	37.8962	36.3976	5.88502	5.79344	5.29143
chr2	1403125	1403484	360	ENSAPLG00000020733	ENSAPLT00000017641	7133		NA	NA	NA	NA		Exon (ENSAPLT00000029857/ENSAPLG00000030207, exon 1 of 8)	-2.36	-3.34	-1.31	down	1.15004	0.20169	0.803618	0.847014	up	no	72.1611	64.126	55.2166	55.9992	49.1503	61.3691
chr2	1751821	1753065	1245	ENSAPLG00000015682	ENSAPLT00000016419	8992	DHX30	GO:0003676(nucleic acid binding);GO:0003682(chromatin binding);GO:0003723(RNA binding);GO:0003725(double-stranded RNA binding);GO:0004004(ATP-dependent RNA helicase activity);GO:0004386(helicase activity);GO:0005524(ATP binding);GO:0005737(cytoplasm);GO:0005739(mitochondrion);GO:0005829(cytosol);GO:0007417(central nervous system development);GO:0035770(ribonucleoprotein granule);GO:0042645(mitoch…	NA	NA	NA	DExH-box helicase 30 [Source:HGNC Symbol;Acc:HGNC:16716]	Exon (ENSAPLT00000016419/ENSAPLG00000015682, exon 4 of 14)	-1.11	-1.76	-0.298	down	2.19815	1.13629	6.82288e-05	0.000173087	up	yes	94.9694	85.3453	94.0933	46.6704	37.1826	40.9831
chr2	2494671	2494789	119	ENSAPLG00000022202	ENSAPLT00000025290	9793	ARF1	GO:0000287(magnesium ion binding);GO:0005525(GTP binding);GO:0005794(Golgi apparatus);GO:0005829(cytosol);GO:0006878(cellular copper ion homeostasis);GO:0012505(endomembrane system);GO:0016192(vesicle-mediated transport);GO:0019904(protein domain specific binding);GO:0030017(sarcomere);GO:0031252(cell leading edge);GO:0032991(protein-containing complex);GO:0046982(protein heterodimerization activ…	04072(Phospholipase D signaling pathway);04144(Endocytosis);05134(Legionellosis)	K07937	NA	ADP ribosylation factor 1 [Source:HGNC Symbol;Acc:HGNC:652]	Exon (ENSAPLT00000025290/ENSAPLG00000022202, exon 5 of 5)	-36.7	-39.4	-0.537	down	1.38221	0.466975	0.324742	0.39535	up	no	332.338	343.624	371.486	273.269	253.63	230.909
chr2	4367096	4367244	149	ENSAPLG00000027330	ENSAPLT00000025627	3803		GO:0003676(nucleic acid binding);GO:0003676(nucleic acid binding)	NA	NA	NA		Exon (ENSAPLT00000044952/ENSAPLG00000027330, exon 3 of 4)	-0.288	-0.434	2.32	up	inf	inf	1.10744e-07	3.91184e-07	up	yes	0.852974	0.894975	0.765596	0	0	0
chr2	4609701	4612222	2522	ENSAPLG00000030602	ENSAPLT00000017425	67249	CTDSPL	GO:0001933(negative regulation of protein phosphorylation);GO:0006357(regulation of transcription by RNA polymerase II);GO:0008420(RNA polymerase II CTD heptapeptide repeat phosphatase activity);GO:0016791(phosphatase activity);GO:2000134(negative regulation of G1/S transition of mitotic cell cycle);GO:2000134(negative regulation of G1/S transition of mitotic cell cycle)	NA	NA	NA	CTD small phosphatase like [Source:HGNC Symbol;Acc:HGNC:16890]	3' UTR	-3.76	-4.98	0.361	up	0.333692	-1.58341	4.45543e-10	2.01411e-09	down	yes	10.8939	6.52372	11.643	32.6892	35.9389	18.4601
chr2	5681567	5682136	570	ENSAPLG00000009692	ENSAPLT00000034804	216421		GO:0001518(voltage-gated sodium channel complex);GO:0005216(ion channel activity);GO:0005248(voltage-gated sodium channel activity);GO:0005515(protein binding);GO:0006811(ion transport);GO:0006814(sodium ion transport);GO:0016020(membrane);GO:0055085(transmembrane transport);GO:0055085(transmembrane transport)	04261(Adrenergic signaling in cardiomyocytes);04261(Adrenergic signaling in cardiomyocytes)	K04838	NA		3' UTR	-3.19	-4.32	4.43	up	0.896381	-0.157816	1	1	down	no	0.0441876	0.0773767	0.0921126	0.0458682	0.0614397	0.131069
chr2	7862103	7862491	389	ENSAPLG00000008020	ENSAPLT00000008356	312474	DPP6	GO:0006508(proteolysis);GO:0008076(voltage-gated potassium channel complex);GO:0008236(serine-type peptidase activity);GO:0015459(potassium channel regulator activity);GO:0016021(integral component of membrane);GO:1901379(regulation of potassium ion transmembrane transport)	NA	NA	NA	dipeptidyl peptidase like 6 [Source:HGNC Symbol;Acc:HGNC:3010]	3' UTR	-0.49	-0.828	-1.59	down	0.306375	-1.70663	0.0516025	0.0786298	down	no	0.0467651	0.0893226	0.315519	1.02459	0.203461	0.245977
chr2	8884888	8897806	12919	ENSAPLG00000005692	ENSAPLT00000006021	30	UBE3C	GO:0000209(protein polyubiquitination);GO:0004842(ubiquitin-protein transferase activity);GO:0005515(protein binding)	04120(Ubiquitin mediated proteolysis)	K10589	EC:2.3.2.26	ubiquitin protein ligase E3C [Source:HGNC Symbol;Acc:HGNC:16803]	Exon (ENSAPLT00000006021/ENSAPLG00000005692, exon 1 of 23)	-0.843	-1.39	-0.844	down	0.359549	-1.47574	1.55433e-06	4.82371e-06	down	yes	2.39991	1.33011	2.9338	6.11505	7.45348	4.96531
chr2	8931286	8931465	180	ENSAPLG00000005692	ENSAPLT00000006021	46428	UBE3C	GO:0000209(protein polyubiquitination);GO:0004842(ubiquitin-protein transferase activity);GO:0005515(protein binding)	04120(Ubiquitin mediated proteolysis)	K10589	EC:2.3.2.26	ubiquitin protein ligase E3C [Source:HGNC Symbol;Acc:HGNC:16803]	Exon (ENSAPLT00000006021/ENSAPLG00000005692, exon 18 of 23)	-0.787	-1.31	1.16	up	0.359549	-1.47574	1.55433e-06	4.82371e-06	down	yes	2.39991	1.33011	2.9338	6.11505	7.45348	4.96531
chr2	15015856	15016095	240	ENSAPLG00000007667	ENSAPLT00000007993	5027	ARHGAP12	GO:0001891(phagocytic cup);GO:0002011(morphogenesis of an epithelial sheet);GO:0005515(protein binding);GO:0006911(phagocytosis, engulfment);GO:0007015(actin filament organization);GO:0007165(signal transduction);GO:0051058(negative regulation of small GTPase mediated signal transduction);GO:0051058(negative regulation of small GTPase mediated signal transduction)	NA	NA	NA	Rho GTPase activating protein 12 [Source:HGNC Symbol;Acc:HGNC:16348]	5' UTR	-1.13	-1.78	-1.13	down	0.498745	-1.00363	0.000940343	0.00199692	down	yes	1.64359	1.0918	2.72726	3.55303	3.62078	3.77901
chr2	17878724	17879202	479	ENSAPLG00000008113	ENSAPLT00000008512	45417	ARHGAP21	GO:0005515(protein binding);GO:0005543(phospholipid binding);GO:0005794(Golgi apparatus);GO:0005886(plasma membrane);GO:0007030(Golgi organization);GO:0007165(signal transduction);GO:0015629(actin cytoskeleton);GO:0030054(cell junction);GO:0051683(establishment of Golgi localization);GO:0051684(maintenance of Golgi location);GO:0072384(organelle transport along microtubule);GO:0072384(organelle t…	NA	NA	NA	Rho GTPase activating protein 21 [Source:HGNC Symbol;Acc:HGNC:23725]	Exon (ENSAPLT00000008512/ENSAPLG00000008113, exon 7 of 24)	-1.85	-2.72	-1.19	down	0.221345	-2.17563	6.04219e-18	5.03922e-17	down	yes	2.33073	2.97028	4.26073	15.8473	17.1936	10.1574
chr2	18671444	18673428	1985	ENSAPLG00000004521	ENSAPLT00000004674	102072	PIP4K2A	GO:0005776(autophagosome);GO:0010506(regulation of autophagy);GO:0016307(phosphatidylinositol phosphate kinase activity);GO:0035855(megakaryocyte development);GO:0046488(phosphatidylinositol metabolic process);GO:2000786(positive regulation of autophagosome assembly)	00562(Inositol phosphate metabolism);04070(Phosphatidylinositol signaling system);04810(Regulation of actin cytoskeleton)	K00920	EC:2.7.1.149	phosphatidylinositol-5-phosphate 4-kinase type 2 alpha [Source:HGNC Symbol;Acc:HGNC:8997]	Exon (ENSAPLT00000004674/ENSAPLG00000004521, exon 9 of 10)	-2.71	-3.76	0.819	up	0.142543	-2.81053	1.05886e-31	1.80706e-30	down	yes	10.0421	8.16668	11.7627	73.8302	79.3905	57.0421
chr2	18764563	18764772	210	ENSAPLG00000017813	ENSAPLT00000041440	416		NA	NA	NA	NA		Exon (ENSAPLT00000041440/ENSAPLG00000017813, exon 1 of 2)	-0.276	-0.403	2.09	up	inf	inf	1	1	up	no	0.149637	0.254499	0	0	0	0
chr2	18764920	18765673	754	ENSAPLG00000017813	ENSAPLT00000041440	773		NA	NA	NA	NA		Exon (ENSAPLT00000041440/ENSAPLG00000017813, exon 1 of 2)	-0.363	-0.597	1.93	up	inf	inf	1	1	up	no	0.149637	0.254499	0	0	0	0
chr2	21914936	21917148	2213	ENSAPLG00000014281	ENSAPLT00000029761	0	CROT	GO:0005102(signaling receptor binding);GO:0005777(peroxisome);GO:0006091(generation of precursor metabolites and energy);GO:0006631(fatty acid metabolic process);GO:0006635(fatty acid beta-oxidation);GO:0008458(carnitine O-octanoyltransferase activity);GO:0016746(transferase activity, transferring acyl groups);GO:0043231(intracellular membrane-bounded organelle);GO:0051791(medium-chain fatty acid…	04146(Peroxisome);04146(Peroxisome)	K05940	EC:2.3.1.137	carnitine O-octanoyltransferase [Source:HGNC Symbol;Acc:HGNC:2366]	5' UTR	-2.34	-3.31	-0.957	down	0.168419	-2.56987	3.00522e-30	4.75903e-29	down	yes	13.1167	14.0066	21.7693	113.382	92.3745	84.5472
chr2	22081394	22086527	5134	ENSAPLG00000004198	ENSAPLT00000004341	28683	RUNDC3B	NA	02010(ABC transporters);04976(Bile secretion)	K05659	EC:3.6.3.44	RUN domain containing 3B [Source:HGNC Symbol;Acc:HGNC:30286]	Exon (ENSAPLT00000004341/ENSAPLG00000004198, exon 7 of 8)	-0.357	-0.583	-1.7	down	inf	inf	1	1	up	no	0.522431	0.54108	0	0	0	0
chr2	24873823	24880165	6343	ENSAPLG00000010896	ENSAPLT00000011352	0		GO:0003995(acyl-CoA dehydrogenase activity);GO:0016627(oxidoreductase activity, acting on the CH-CH group of donors);GO:0050660(flavin adenine dinucleotide binding);GO:0055114(oxidation-reduction process)	00650(Butanoate metabolism);00071(Fatty acid degradation);00280(Valine, leucine and isoleucine degradation)	K00248	EC:1.3.8.1		5' UTR	-8.04	-9.71	0.349	up	0.254126	-1.97638	1.25716e-17	1.02936e-16	down	yes	9.57194	13.9067	11.0561	49.9279	42.3279	43.6403
chr2	24877622	24880226	2605	ENSAPLG00000010896	ENSAPLT00000011352	0		GO:0003995(acyl-CoA dehydrogenase activity);GO:0016627(oxidoreductase activity, acting on the CH-CH group of donors);GO:0050660(flavin adenine dinucleotide binding);GO:0055114(oxidation-reduction process)	00650(Butanoate metabolism);00071(Fatty acid degradation);00280(Valine, leucine and isoleucine degradation)	K00248	EC:1.3.8.1		5' UTR	-8.11	-9.79	0.36	up	0.254126	-1.97638	1.25716e-17	1.02936e-16	down	yes	9.57194	13.9067	11.0561	49.9279	42.3279	43.6403
chr2	25435181	25435353	173	ENSAPLG00000017093	ENSAPLT00000021907	57		NA	NA	NA	NA		Exon (ENSAPLT00000021907/ENSAPLG00000017093, exon 1 of 4)	-0.504	-0.853	-0.591	down	0.481897	-1.0532	0.10175	0.143756	down	no	4.33863	1.77648	1.38662	7.76199	5.26933	2.53576
chr2	34457155	34462751	5597	ENSAPLG00000011969	ENSAPLT00000012470	0	CBX3	GO:0000775(chromosome, centromeric region);GO:0000785(chromatin);GO:0005634(nucleus);GO:0005719(nuclear euchromatin);GO:0005720(nuclear heterochromatin);GO:0005819(spindle);GO:0006974(cellular response to DNA damage stimulus);GO:0019899(enzyme binding);GO:0019904(protein domain specific binding);GO:0042802(identical protein binding);GO:0045892(negative regulation of transcription, DNA-templated);…	NA	NA	NA	chromobox 3 [Source:HGNC Symbol;Acc:HGNC:1553]	5' UTR	-7.45	-9.07	0.799	up	0.869659	-0.201478	0.0768006	0.112001	down	no	38.7941	34.4456	55.4485	54.7732	47.557	45.6452
chr2	35786784	35792146	5363	ENSAPLG00000004960	ENSAPLT00000005119	202050	CREB5	GO:0003676(nucleic acid binding);GO:0003700(DNA-binding transcription factor activity);GO:0006355(regulation of transcription, DNA-templated);GO:0045893(positive regulation of transcription, DNA-templated);GO:0045893(positive regulation of transcription, DNA-templated)	04261(Adrenergic signaling in cardiomyocytes);04261(Adrenergic signaling in cardiomyocytes)	K09047	NA	cAMP responsive element binding protein 5 [Source:HGNC Symbol;Acc:HGNC:16844]	Exon (ENSAPLT00000005119/ENSAPLG00000004960, exon 7 of 10)	-8.81	-10.6	-1.97	down	0.681968	-0.552224	0.151573	0.203378	down	no	2.56379	1.96226	3.05597	6.07599	3.16965	1.87222
chr2	36045104	36062947	17844	ENSAPLG00000004770	ENSAPLT00000045303	165619		GO:0005096(GTPase activator activity);GO:0007165(signal transduction);GO:0035556(intracellular signal transduction);GO:0043547(positive regulation of GTPase activity);GO:0051056(regulation of small GTPase mediated signal transduction);GO:0051056(regulation of small GTPase mediated signal transduction)	NA	NA	NA		Exon (ENSAPLT00000045303/ENSAPLG00000004770, exon 6 of 13)	-2.05	-2.97	-1.12	down	6.15449	2.62164	2.95997e-09	1.23882e-08	up	yes	11.1487	8.94499	11.151	1.84622	2.213	1.01752
chr2	36320281	36320630	350	ENSAPLG00000029164	ENSAPLT00000033099	320		NA	NA	NA	NA		Exon (ENSAPLT00000033099/ENSAPLG00000029164, exon 1 of 3)	-0.334	-0.538	-2.62	down	-inf	-inf	1	1	down	no	0	0	0	0.799702	0.478568	0
chr2	36871290	36927948	56659	ENSAPLG00000015653	ENSAPLT00000016321	30	PLCL2	GO:0002322(B cell proliferation involved in immune response);GO:0002337(B-1a B cell differentiation);GO:0004435(phosphatidylinositol phospholipase C activity);GO:0006629(lipid metabolic process);GO:0007165(signal transduction);GO:0007214(gamma-aminobutyric acid signaling pathway);GO:0008081(phosphoric diester hydrolase activity);GO:0032228(regulation of synaptic transmission, GABAergic);GO:003313…	NA	NA	NA	phospholipase C like 2 [Source:HGNC Symbol;Acc:HGNC:9064]	5' UTR	-3.67	-4.87	-1.32	down	0.0782989	-3.67486	6.34114e-20	5.94122e-19	down	yes	0.484698	0.67516	0.817477	10.8981	10.4323	3.92325
chr2	40093025	40191180	98156	ENSAPLG00000006432	ENSAPLT00000037629	0	RARB	GO:0000122(negative regulation of transcription by RNA polymerase II);GO:0001657(ureteric bud development);GO:0002068(glandular epithelial cell development);GO:0003148(outflow tract septum morphogenesis);GO:0003417(growth plate cartilage development);GO:0003677(DNA binding);GO:0003700(DNA-binding transcription factor activity);GO:0003707(steroid hormone receptor activity);GO:0004879(nuclear recep…	NA	NA	NA	retinoic acid receptor beta [Source:HGNC Symbol;Acc:HGNC:9865]	5' UTR	-1.02	-1.64	-0.576	down	2.2823	1.19049	0.000453713	0.00101442	up	yes	15.2732	12.2086	20.4952	7.50151	6.7277	6.79216
chr2	41382378	41382497	120	ENSAPLG00000012270	ENSAPLT00000035141	30	RBMS3	GO:0002357(defense response to tumor cell);GO:0003676(nucleic acid binding);GO:0003723(RNA binding);GO:0003730(mRNA 3'-UTR binding);GO:0005737(cytoplasm);GO:0008143(poly(A) binding);GO:0008266(poly(U) RNA binding);GO:0010628(positive regulation of gene expression);GO:0010629(negative regulation of gene expression);GO:0035925(mRNA 3'-UTR AU-rich region binding);GO:0045727(positive regulation of tr…	NA	NA	NA	RNA binding motif single stranded interacting protein 3 [Source:HGNC Symbol;Acc:HGNC:13427]	5' UTR	-0.402	-0.673	-0.705	down	0.764786	-0.386871	0.0562738	0.0851572	down	no	2.47726	2.72849	4.05267	4.67777	4.1752	3.25291
chr2	41638588	41638707	120	ENSAPLG00000012270	ENSAPLT00000035141	256240	RBMS3	GO:0002357(defense response to tumor cell);GO:0003676(nucleic acid binding);GO:0003723(RNA binding);GO:0003730(mRNA 3'-UTR binding);GO:0005737(cytoplasm);GO:0008143(poly(A) binding);GO:0008266(poly(U) RNA binding);GO:0010628(positive regulation of gene expression);GO:0010629(negative regulation of gene expression);GO:0035925(mRNA 3'-UTR AU-rich region binding);GO:0045727(positive regulation of tr…	NA	NA	NA	RNA binding motif single stranded interacting protein 3 [Source:HGNC Symbol;Acc:HGNC:13427]	5' UTR	-0.622	-1.05	-1.22	down	0.764786	-0.386871	0.0562738	0.0851572	down	no	2.47726	2.72849	4.05267	4.67777	4.1752	3.25291
chr2	41638827	41735261	96435	ENSAPLG00000012270	ENSAPLT00000035141	256479	RBMS3	GO:0002357(defense response to tumor cell);GO:0003676(nucleic acid binding);GO:0003723(RNA binding);GO:0003730(mRNA 3'-UTR binding);GO:0005737(cytoplasm);GO:0008143(poly(A) binding);GO:0008266(poly(U) RNA binding);GO:0010628(positive regulation of gene expression);GO:0010629(negative regulation of gene expression);GO:0035925(mRNA 3'-UTR AU-rich region binding);GO:0045727(positive regulation of tr…	NA	NA	NA	RNA binding motif single stranded interacting protein 3 [Source:HGNC Symbol;Acc:HGNC:13427]	5' UTR	-3.49	-4.67	-1.59	down	0.764786	-0.386871	0.0562738	0.0851572	down	no	2.47726	2.72849	4.05267	4.67777	4.1752	3.25291
chr2	43583370	43583459	90	ENSAPLG00000021366	ENSAPLT00000046630	7370		NA	NA	NA	NA		Exon (ENSAPLT00000046630/ENSAPLG00000021366, exon 3 of 3)	-0.276	-0.423	2.81	up	4.63074	2.21124	0.0575312	0.0867548	up	no	2.07895	2.24794	2.72032	0.845453	0.676383	0
chr2	43595273	43595542	270	ENSAPLG00000026835	ENSAPLT00000029117	1467	POMGNT2	GO:0001764(neuron migration);GO:0005515(protein binding);GO:0005783(endoplasmic reticulum);GO:0006493(protein O-linked glycosylation);GO:0008375(acetylglucosaminyltransferase activity);GO:0016757(transferase activity, transferring glycosyl groups);GO:0035269(protein O-linked mannosylation);GO:0097363(protein O-GlcNAc transferase activity)	00515(Mannose type O-glycan biosyntheis)	K18207	EC:2.4.1.312	protein O-linked mannose N-acetylglucosaminyltransferase 2 (beta 1,4-) [Source:HGNC Symbol;Acc:HGNC:25902]	Exon (ENSAPLT00000029117/ENSAPLG00000026835, exon 1 of 1)	-1.46	-2.22	0.589	up	1.69434	0.760721	0.110549	0.15481	up	no	18.9664	16.9447	13.0642	10.5831	7.6392	10.683
chr2	43672456	43672657	202	ENSAPLG00000003472	ENSAPLT00000003533	4112		GO:0003839(gamma-glutamylcyclotransferase activity)	00480(Glutathione metabolism)	K00682	EC:4.3.2.9		3' UTR	-0.727	-1.21	-0.426	down	5.72915	2.51832	2.3116e-13	1.40644e-12	up	yes	44.2996	50.1939	52.2924	8.80457	8.91238	7.90391
chr2	45263672	45264179	508	ENSAPLG00000001960	ENSAPLT00000001961	13943	CXCR6	GO:0004930(G protein-coupled receptor activity);GO:0004950(chemokine receptor activity);GO:0006935(chemotaxis);GO:0006954(inflammatory response);GO:0006955(immune response);GO:0007186(G protein-coupled receptor signaling pathway);GO:0016021(integral component of membrane);GO:0016493(C-C chemokine receptor activity);GO:0016494(C-X-C chemokine receptor activity);GO:0019958(C-X-C chemokine binding);…	04060(Cytokine-cytokine receptor interaction)	K04191	NA	C-X-C motif chemokine receptor 6 [Source:HGNC Symbol;Acc:HGNC:16647]	Exon (ENSAPLT00000010676/ENSAPLG00000010233, exon 8 of 15)	-0.818	-1.35	0.618	up	-inf	-inf	1	1	down	no	0	0	0	0	0	0.401468
chr2	45264298	45264716	419	ENSAPLG00000001960	ENSAPLT00000001961	13406	CXCR6	GO:0004930(G protein-coupled receptor activity);GO:0004950(chemokine receptor activity);GO:0006935(chemotaxis);GO:0006954(inflammatory response);GO:0006955(immune response);GO:0007186(G protein-coupled receptor signaling pathway);GO:0016021(integral component of membrane);GO:0016493(C-C chemokine receptor activity);GO:0016494(C-X-C chemokine receptor activity);GO:0019958(C-X-C chemokine binding);…	04060(Cytokine-cytokine receptor interaction)	K04191	NA	C-X-C motif chemokine receptor 6 [Source:HGNC Symbol;Acc:HGNC:16647]	Exon (ENSAPLT00000010676/ENSAPLG00000010233, exon 10 of 15)	-0.692	-1.16	1.24	up	-inf	-inf	1	1	down	no	0	0	0	0	0	0.401468
chr2	45264805	45265462	658	ENSAPLG00000001960	ENSAPLT00000001961	12660	CXCR6	GO:0004930(G protein-coupled receptor activity);GO:0004950(chemokine receptor activity);GO:0006935(chemotaxis);GO:0006954(inflammatory response);GO:0006955(immune response);GO:0007186(G protein-coupled receptor signaling pathway);GO:0016021(integral component of membrane);GO:0016493(C-C chemokine receptor activity);GO:0016494(C-X-C chemokine receptor activity);GO:0019958(C-X-C chemokine binding);…	04060(Cytokine-cytokine receptor interaction)	K04191	NA	C-X-C motif chemokine receptor 6 [Source:HGNC Symbol;Acc:HGNC:16647]	Exon (ENSAPLT00000010676/ENSAPLG00000010233, exon 10 of 15)	-1.42	-2.16	-0.963	down	-inf	-inf	1	1	down	no	0	0	0	0	0	0.401468
chr2	49551268	49552347	1080	ENSAPLG00000018458	ENSAPLT00000037879	0		NA	NA	NA	NA		Exon (ENSAPLT00000037879/ENSAPLG00000018458, exon 1 of 1)	-15	-17.1	-0.564	down	5.22581	2.38565	6.81381e-16	4.92665e-15	up	yes	101.507	79.3307	121.52	16.3926	24.8251	16.6407
chr2	51298399	51298757	359	ENSAPLG00000020318	ENSAPLT00000035504	11617	CD83	GO:0009897(external side of plasma membrane);GO:0014070(response to organic cyclic compound);GO:0032713(negative regulation of interleukin-4 production);GO:0032733(positive regulation of interleukin-10 production);GO:0032743(positive regulation of interleukin-2 production);GO:0043372(positive regulation of CD4-positive, alpha-beta T cell differentiation)	NA	NA	NA	CD83 molecule [Source:HGNC Symbol;Acc:HGNC:1703]	3' UTR	-0.434	-0.73	2.22	up	0.712397	-0.489246	0.368648	0.440696	down	no	0.315607	0.26039	0.232544	0.530632	0.175894	0.428432
chr2	51854191	51855906	1716	ENSAPLG00000004296	ENSAPLT00000004438	84236	JARID2	GO:0000122(negative regulation of transcription by RNA polymerase II);GO:0000977(RNA polymerase II regulatory region sequence-specific DNA binding);GO:0001227(DNA-binding transcription repressor activity, RNA polymerase II-specific);GO:0001889(liver development);GO:0003677(DNA binding);GO:0003682(chromatin binding);GO:0005634(nucleus);GO:0005739(mitochondrion);GO:0008134(transcription factor bind…	NA	NA	NA	jumonji and AT-rich interaction domain containing 2 [Source:HGNC Symbol;Acc:HGNC:6196]	3' UTR	-1.21	-1.89	-0.603	down	2.26309	1.1783	0.00178572	0.00363373	up	yes	14.5373	9.66336	18.3772	6.26331	8.13877	4.41195
chr2	57878625	57880584	1960	ENSAPLG00000022687	ENSAPLT00000045319	744		GO:0004298(threonine-type endopeptidase activity);GO:0005839(proteasome core complex);GO:0019773(proteasome core complex, alpha-subunit complex);GO:0051603(proteolysis involved in cellular protein catabolic process)	03050(Proteasome)	K02726	EC:3.4.25.1		Exon (ENSAPLT00000045319/ENSAPLG00000022687, exon 1 of 7)	-0.926	-1.5	0.347	up	1.18276	0.242161	0.921025	0.939589	up	no	43.1854	43.587	53.5834	41.3856	41.8875	35.3946
chr2	58320823	58321033	211	ENSAPLG00000004361	ENSAPLT00000004545	212367	GLI3	GO:0000122(negative regulation of transcription by RNA polymerase II);GO:0000977(RNA polymerase II regulatory region sequence-specific DNA binding);GO:0000978(RNA polymerase II proximal promoter sequence-specific DNA binding);GO:0001656(metanephros development);GO:0001658(branching involved in ureteric bud morphogenesis);GO:0001701(in utero embryonic development);GO:0001822(kidney development);GO…	04340(Hedgehog signaling pathway)	K06230	NA	GLI family zinc finger 3 [Source:HGNC Symbol;Acc:HGNC:4319]	Exon (ENSAPLT00000004545/ENSAPLG00000004361, exon 15 of 15)	-0.45	-0.759	-2.04	down	2.60881	1.38339	0.0132584	0.0230188	up	yes	1.83674	1.29232	2.07545	0.568991	0.912417	0.513569
chr2	58453377	58453765	389	ENSAPLG00000018903	ENSAPLT00000032658	14246	INHBA	GO:0000082(G1/S transition of mitotic cell cycle);GO:0001541(ovarian follicle development);GO:0001707(mesoderm formation);GO:0001942(hair follicle development);GO:0002244(hematopoietic progenitor cell differentiation);GO:0005102(signaling receptor binding);GO:0005125(cytokine activity);GO:0005179(hormone activity);GO:0005576(extracellular region);GO:0006357(regulation of transcription by RNA poly…	04350(TGF-beta signaling pathway);04060(Cytokine-cytokine receptor interaction)	K04667	NA	inhibin subunit beta A [Source:HGNC Symbol;Acc:HGNC:6066]	Exon (ENSAPLT00000032658/ENSAPLG00000018903, exon 3 of 3)	-1.45	-2.21	-1.59	down	1.18947	0.250321	0.981904	0.987309	up	no	1.70622	0.55201	1.56418	1.13196	1.27198	0.809592
chr2	59726576	59726666	91	ENSAPLG00000005152	ENSAPLT00000005433	106717	VPS41	GO:0005515(protein binding);GO:0005765(lysosomal membrane);GO:0005769(early endosome);GO:0005770(late endosome);GO:0006886(intracellular protein transport);GO:0008017(microtubule binding);GO:0008333(endosome to lysosome transport);GO:0010008(endosome membrane);GO:0015630(microtubule cytoskeleton);GO:0016192(vesicle-mediated transport);GO:0030123(AP-3 adaptor complex);GO:0030136(clathrin-coated ve…	NA	NA	NA	VPS41, HOPS complex subunit [Source:HGNC Symbol;Acc:HGNC:12713]	3' UTR	-0.433	-0.728	-0.706	down	0.794512	-0.331859	0.0326747	0.0520306	down	no	7.24634	7.08882	10.0164	12.9083	10.0377	7.70374
chr2	60096252	60096582	331	ENSAPLG00000010196	ENSAPLT00000010647	37840	GOLGA4	GO:0005737(cytoplasm);GO:0005794(Golgi apparatus);GO:0005829(cytosol);GO:0043001(Golgi to plasma membrane protein transport);GO:0043231(intracellular membrane-bounded organelle);GO:0045773(positive regulation of axon extension);GO:0051020(GTPase binding)	NA	NA	NA	golgin A4 [Source:HGNC Symbol;Acc:HGNC:4427]	Exon (ENSAPLT00000010647/ENSAPLG00000010196, exon 16 of 24)	-2.91	-3.99	-2.63	down	0.684015	-0.5479	0.0219214	0.0363889	down	no	0.946315	0.851909	1.43594	1.9789	1.34972	1.39959
chr2	60139174	60139354	181	ENSAPLG00000009236	ENSAPLT00000022111	510	ITGA9	GO:0007155(cell adhesion);GO:0008305(integrin complex);GO:0008305(integrin complex)	04512(ECM-receptor interaction);04514(Cell adhesion molecules (CAMs));04510(Focal adhesion);04810(Regulation of actin cytoskeleton);04810(Regulation of actin cytoskeleton)	K06585	NA	integrin subunit alpha 9 [Source:HGNC Symbol;Acc:HGNC:6145]	5' UTR	-0.196	-0.219	-1	down	1.08939	0.123522	0.871621	0.901211	up	no	0.364709	0.180287	0.460332	0.396494	0.39267	0.13367
chr2	65306406	65306612	207	ENSAPLG00000021904	ENSAPLT00000047029	6413		NA	NA	NA	NA		Exon (ENSAPLT00000047029/ENSAPLG00000021904, exon 2 of 2)	-1.53	-2.31	-1.06	down	0.202041	-2.30728	9.94804e-09	3.95966e-08	down	yes	1.68115	3.71062	3.87983	11.5509	23.9962	10.3426
chr2	67159049	67159257	209	ENSAPLG00000003330	ENSAPLT00000034050	16996	TFAP2A	GO:0003700(DNA-binding transcription factor activity);GO:0005634(nucleus);GO:0005654(nucleoplasm);GO:0005794(Golgi apparatus);GO:0005813(centrosome);GO:0005829(cytosol);GO:0006355(regulation of transcription, DNA-templated);GO:0043231(intracellular membrane-bounded organelle);GO:0043231(intracellular membrane-bounded organelle)	NA	NA	NA	transcription factor AP-2 alpha [Source:HGNC Symbol;Acc:HGNC:11742]	Exon (ENSAPLT00000034050/ENSAPLG00000003330, exon 7 of 7)	-0.369	-0.608	1.85	up	inf	inf	3.40567e-184	3.90706e-181	up	yes	100.294	94.0215	115.118	0	0	0
chr2	69475865	69476043	179	ENSAPLG00000025581	ENSAPLT00000033412	91531		NA	NA	NA	NA		3' UTR	-0.715	-1.2	0.573	up	0.669981	-0.577807	0.012333	0.0215535	down	no	12.0489	8.28169	9.20483	13.0454	16.3883	14.6502
chr2	69879796	69883072	3277	ENSAPLG00000006391	ENSAPLT00000006620	5572	OTULIN	GO:0002040(sprouting angiogenesis);GO:0004843(thiol-dependent ubiquitin-specific protease activity);GO:0005737(cytoplasm);GO:0008234(cysteine-type peptidase activity);GO:0010803(regulation of tumor necrosis factor-mediated signaling pathway);GO:0032088(negative regulation of NF-kappaB transcription factor activity);GO:0045087(innate immune response);GO:0050728(negative regulation of inflammatory …	NA	NA	NA	OTU deubiquitinase with linear linkage specificity [Source:HGNC Symbol;Acc:HGNC:25118]	Exon (ENSAPLT00000006620/ENSAPLG00000006391, exon 5 of 8)	-3.4	-4.57	0.581	up	0.637655	-0.649153	0.000321641	0.000737495	down	no	16.8443	14.8217	23.2656	33.231	29.0696	23.8457
chr2	74255346	74255790	445	ENSAPLG00000006943	ENSAPLT00000007232	18912	KDSR	GO:0005783(endoplasmic reticulum);GO:0006666(3-keto-sphinganine metabolic process);GO:0030148(sphingolipid biosynthetic process);GO:0047560(3-dehydrosphinganine reductase activity);GO:0047560(3-dehydrosphinganine reductase activity)	00600(Sphingolipid metabolism);00600(Sphingolipid metabolism)	K04708	EC:1.1.1.102	3-ketodihydrosphingosine reductase [Source:HGNC Symbol;Acc:HGNC:4021]	3' UTR	-1.89	-2.77	-0.632	down	0.668006	-0.582067	0.030577	0.0490306	down	no	4.19277	2.9793	6.99202	8.10762	7.47112	5.6248
chr2	74372564	74372890	327	ENSAPLG00000019497	ENSAPLT00000037848	180		GO:0016020(membrane)	04530(Tight junction)	K21099	NA		5' UTR	-0.765	-1.27	0.989	up	0.157298	-2.66843	8.65967e-12	4.65925e-11	down	yes	3.78143	4.35294	2.83697	18.6512	37.559	13.5386
chr2	74919160	74919567	408	ENSAPLG00000012020	ENSAPLT00000012502	0	RNF152	GO:0000209(protein polyubiquitination);GO:0004842(ubiquitin-protein transferase activity);GO:0005764(lysosome);GO:0005765(lysosomal membrane);GO:0006915(apoptotic process);GO:0010508(positive regulation of autophagy);GO:0031267(small GTPase binding);GO:0031301(integral component of organelle membrane);GO:0034198(cellular response to amino acid starvation);GO:0061630(ubiquitin protein ligase activ…	04150(mTOR signaling pathway)	K15705	EC:2.3.2.27	ring finger protein 152 [Source:HGNC Symbol;Acc:HGNC:26811]	Exon (ENSAPLT00000012502/ENSAPLG00000012020, exon 1 of 1)	-2.64	-3.68	-0.552	down	0.971191	-0.0421725	0.409036	0.481068	down	no	15.9047	11.761	14.6496	13.863	15.6536	14.0538
chr2	79110222	79110461	240	ENSAPLG00000013701	ENSAPLT00000014267	58447	MYLK4	GO:0004672(protein kinase activity);GO:0005524(ATP binding);GO:0006468(protein phosphorylation);GO:0006468(protein phosphorylation)	04371(Apelin signaling pathway);04020(Calcium signaling pathway);04510(Focal adhesion);04810(Regulation of actin cytoskeleton);04270(Vascular smooth muscle contraction);04270(Vascular smooth muscle contraction)	K00907	EC:2.7.11.18	myosin light chain kinase family member 4 [Source:HGNC Symbol;Acc:HGNC:27972]	Exon (ENSAPLT00000014267/ENSAPLG00000013701, exon 4 of 14)	-0.429	-0.721	-2.12	down	4.26894	2.09388	1	1	up	no	0	0.0603357	0.415588	0	0.111485	0
chr2	82788952	82789070	119	ENSAPLG00000026210	ENSAPLT00000032743	1564		NA	NA	NA	NA		Exon (ENSAPLT00000032743/ENSAPLG00000026210, exon 2 of 2)	-0.331	-0.531	-0.678	down	3.50164	1.80803	0.0302709	0.0485699	up	yes	0.783923	0.855496	1.75031	0.338788	0.34269	0.286564
chr2	82789871	82790019	149	ENSAPLG00000026210	ENSAPLT00000032743	2483		NA	NA	NA	NA		Exon (ENSAPLT00000032743/ENSAPLG00000026210, exon 2 of 2)	-0.439	-0.738	1.63	up	3.50164	1.80803	0.0302709	0.0485699	up	yes	0.783923	0.855496	1.75031	0.338788	0.34269	0.286564
chr2	82859633	82859901	269	ENSAPLG00000016279	ENSAPLT00000016986	621	SNRNP48	NA	NA	NA	NA	small nuclear ribonucleoprotein U11/U12 subunit 48 [Source:HGNC Symbol;Acc:HGNC:21368]	Exon (ENSAPLT00000016986/ENSAPLG00000016279, exon 1 of 9)	-3.24	-4.39	-2.62	down	0.447517	-1.15998	3.725e-06	1.10742e-05	down	yes	4.8566	6.79349	6.89548	13.7052	12.6165	15.1193
chr2	83546765	83549131	2367	ENSAPLG00000006152	ENSAPLT00000028203	321653	SEMA5A	GO:0005515(protein binding);GO:0005515(protein binding)	04360(Axon guidance);04360(Axon guidance)	K06841	NA	semaphorin 5A [Source:HGNC Symbol;Acc:HGNC:10736]	3' UTR	-4.41	-5.73	-0.931	down	3.36888	1.75227	7.79522e-06	2.22213e-05	up	yes	4.68439	4.23167	5.88379	1.37597	1.94786	1.06927
chr2	83875046	83875820	775	ENSAPLG00000008057	ENSAPLT00000008404	14183	MTRR	GO:0003958(NADPH-hemoprotein reductase activity);GO:0009086(methionine biosynthetic process);GO:0010181(FMN binding);GO:0016491(oxidoreductase activity);GO:0016723(oxidoreductase activity, oxidizing metal ions, NAD or NADP as acceptor);GO:0030586([methionine synthase] reductase activity);GO:0043418(homocysteine catabolic process);GO:0046655(folic acid metabolic process);GO:0050444(aquacobalamin r…	NA	NA	NA	5-methyltetrahydrofolate-homocysteine methyltransferase reductase [Source:HGNC Symbol;Acc:HGNC:7473]	Exon (ENSAPLT00000008912/ENSAPLG00000008569, exon 1 of 6)	-2.13	-3.07	0.577	up	0.782332	-0.354147	0.0378708	0.0595336	down	no	3.6002	3.82446	3.89559	5.04373	5.29925	4.1269
chr2	84505929	84507781	1853	ENSAPLG00000018076	ENSAPLT00000028166	1424	MED10	GO:0003712(transcription coregulator activity);GO:0005654(nucleoplasm);GO:0006357(regulation of transcription by RNA polymerase II);GO:0016592(mediator complex);GO:0019827(stem cell population maintenance);GO:0045944(positive regulation of transcription by RNA polymerase II)	NA	NA	NA	mediator complex subunit 10 [Source:HGNC Symbol;Acc:HGNC:28760]	Exon (ENSAPLT00000028166/ENSAPLG00000018076, exon 3 of 4)	-6.17	-7.68	0.975	up	1.63737	0.711383	0.280672	0.349107	up	no	21.9388	23.608	21.8994	13.5299	13.5713	14.0905
chr2	84627063	84627123	61	ENSAPLG00000011706	ENSAPLT00000012201	9604	UPP1	GO:0003824(catalytic activity);GO:0004850(uridine phosphorylase activity);GO:0005634(nucleus);GO:0005654(nucleoplasm);GO:0005737(cytoplasm);GO:0006218(uridine catabolic process);GO:0006220(pyrimidine nucleotide metabolic process);GO:0009116(nucleoside metabolic process);GO:0009166(nucleotide catabolic process);GO:0016763(transferase activity, transferring pentosyl groups);GO:0046108(uridine metab…	00240(Pyrimidine metabolism);00983(Drug metabolism - other enzymes);00983(Drug metabolism - other enzymes)	K00757	EC:2.4.2.3	uridine phosphorylase 1 [Source:HGNC Symbol;Acc:HGNC:12576]	3' UTR	-0.377	-0.623	-2.1	down	4.07558	2.02701	0.012788	0.0222808	up	yes	1.9404	0.840606	1.9219	0.537444	0.319392	0.297087
chr2	85262676	85263267	592	ENSAPLG00000002792	ENSAPLT00000002827	30	VWC2	GO:0005515(protein binding);GO:0005604(basement membrane);GO:0005614(interstitial matrix);GO:0005615(extracellular space);GO:0010811(positive regulation of cell-substrate adhesion);GO:0030514(negative regulation of BMP signaling pathway);GO:0031012(extracellular matrix);GO:0032281(AMPA glutamate receptor complex);GO:0045666(positive regulation of neuron differentiation)	03008(Ribosome biogenesis in eukaryotes)	K14566	NA	von Willebrand factor C domain containing 2 [Source:HGNC Symbol;Acc:HGNC:30200]	5' UTR	-0.788	-1.31	-1.14	down	59.6103	5.89749	1.44702e-08	5.65285e-08	up	yes	4.89562	3.03797	5.31401	0	0.115015	0.107222
chr2	85317527	85317882	356	ENSAPLG00000002792	ENSAPLT00000002827	54881	VWC2	GO:0005515(protein binding);GO:0005604(basement membrane);GO:0005614(interstitial matrix);GO:0005615(extracellular space);GO:0010811(positive regulation of cell-substrate adhesion);GO:0030514(negative regulation of BMP signaling pathway);GO:0031012(extracellular matrix);GO:0032281(AMPA glutamate receptor complex);GO:0045666(positive regulation of neuron differentiation)	03008(Ribosome biogenesis in eukaryotes)	K14566	NA	von Willebrand factor C domain containing 2 [Source:HGNC Symbol;Acc:HGNC:30200]	3' UTR	-0.49	-0.827	1.77	up	59.6103	5.89749	1.44702e-08	5.65285e-08	up	yes	4.89562	3.03797	5.31401	0	0.115015	0.107222
chr2	85503590	85503769	180	ENSAPLG00000003006	ENSAPLT00000017254	95983	IKZF1	GO:0003676(nucleic acid binding);GO:0003677(DNA binding);GO:0005634(nucleus);GO:0005654(nucleoplasm);GO:0019904(protein domain specific binding);GO:0030098(lymphocyte differentiation);GO:0030218(erythrocyte differentiation);GO:0031618(nuclear pericentric heterochromatin);GO:0032991(protein-containing complex);GO:0051291(protein heterooligomerization);GO:0051291(protein heterooligomerization)	NA	NA	NA	IKAROS family zinc finger 1 [Source:HGNC Symbol;Acc:HGNC:13176]	Exon (ENSAPLT00000017254/ENSAPLG00000003006, exon 8 of 8)	-0.322	-0.514	-1.81	down	1.25311	0.325516	0.933285	0.949342	up	no	0.313212	0.345487	0.517319	0.581756	0.181794	0.174927
chr2	88377429	88377638	210	ENSAPLG00000006413	ENSAPLT00000040092	323886	FHOD3	GO:0007015(actin filament organization);GO:0007015(actin filament organization)	00650(Butanoate metabolism);00280(Valine, leucine and isoleucine degradation);00280(Valine, leucine and isoleucine degradation)	K01907	EC:6.2.1.16	formin homology 2 domain containing 3 [Source:HGNC Symbol;Acc:HGNC:26178]	Exon (ENSAPLT00000040092/ENSAPLG00000006413, exon 19 of 29)	-1.57	-2.37	-3.09	down	0.511979	-0.965842	0.014641	0.0251779	down	no	0.571738	0.485658	0.935211	1.83173	0.94746	1.11278
chr2	94200630	94204902	4273	ENSAPLG00000013444	ENSAPLT00000014011	0	PDCD6	GO:0001938(positive regulation of endothelial cell proliferation);GO:0005509(calcium ion binding);GO:0005634(nucleus);GO:0005737(cytoplasm);GO:0005783(endoplasmic reticulum);GO:0006886(intracellular protein transport);GO:0006888(endoplasmic reticulum to Golgi vesicle-mediated transport);GO:0010595(positive regulation of endothelial cell migration);GO:0014029(neural crest formation);GO:0014032(neu…	NA	NA	NA	programmed cell death 6 [Source:HGNC Symbol;Acc:HGNC:8765]	Exon (ENSAPLT00000014011/ENSAPLG00000013444, exon 1 of 6)	-2.46	-3.46	-0.696	down	1.31733	0.397622	0.596098	0.663223	up	no	45.9209	40.1745	35.6104	35.7074	34.0793	22.6011
chr2	94395553	94395701	149	ENSAPLG00000013907	ENSAPLT00000041004	21156		GO:0003676(nucleic acid binding);GO:0008270(zinc ion binding);GO:0008270(zinc ion binding)	NA	NA	NA		3' UTR	-1.01	-1.62	-2.09	down	0.596321	-0.745838	0.00202619	0.00408601	down	no	5.2035	4.27983	10.9372	12.6356	10.617	10.9916
chr2	94668203	94668739	537	ENSAPLG00000018802	ENSAPLT00000021107	1160		NA	NA	NA	NA		Exon (ENSAPLT00000021107/ENSAPLG00000018802, exon 1 of 1)	-0.655	-1.1	0.747	up	0.915767	-0.126948	0.593355	0.660741	down	no	0.387095	0.13187	0.90987	0.527863	0.508795	0.523603
chr2	96227284	96294983	67700	ENSAPLG00000015083	ENSAPLT00000021549	59140	ZNF516	GO:0000987(proximal promoter sequence-specific DNA binding);GO:0003676(nucleic acid binding);GO:0005634(nucleus);GO:0009409(response to cold);GO:0033613(activating transcription factor binding);GO:0045893(positive regulation of transcription, DNA-templated);GO:0050873(brown fat cell differentiation);GO:0060612(adipose tissue development);GO:0120162(positive regulation of cold-induced thermogenesi…	NA	NA	NA	zinc finger protein 516 [Source:HGNC Symbol;Acc:HGNC:28990]	3' UTR	-0.587	-0.996	0.46	up	2.60166	1.37943	5.24256e-05	0.000135256	up	yes	12.6327	9.13894	18.346	4.82517	5.63275	4.96211
chr2	100337076	100337286	211	ENSAPLG00000001126	ENSAPLT00000001111	988	DSEL	GO:0008146(sulfotransferase activity);GO:0030204(chondroitin sulfate metabolic process);GO:0030205(dermatan sulfate metabolic process);GO:0047757(chondroitin-glucuronate 5-epimerase activity)	00532(Glycosaminoglycan biosynthesis - chondroitin sulfate / dermatan sulfate)	K01794	EC:5.1.3.19	dermatan sulfate epimerase like [Source:HGNC Symbol;Acc:HGNC:18144]	Exon (ENSAPLT00000001111/ENSAPLG00000001126, exon 1 of 1)	-0.44	-0.74	-2.08	down	1.40679	0.492412	0.763118	0.812391	up	no	0.398369	0.532964	1.2697	0.778777	0.579707	0.206087
chr2	103854499	103854768	270	ENSAPLG00000002696	ENSAPLT00000002836	179	ROCK1	GO:0001726(ruffle);GO:0003383(apical constriction);GO:0004672(protein kinase activity);GO:0004674(protein serine/threonine kinase activity);GO:0005524(ATP binding);GO:0005856(cytoskeleton);GO:0005886(plasma membrane);GO:0006468(protein phosphorylation);GO:0007159(leukocyte cell-cell adhesion);GO:0007249(I-kappaB kinase/NF-kappaB signaling);GO:0007266(Rho protein signal transduction);GO:0010494(cy…	04350(TGF-beta signaling pathway);04510(Focal adhesion);04530(Tight junction);04810(Regulation of actin cytoskeleton);04270(Vascular smooth muscle contraction);05132(Salmonella infection);05132(Salmonella infection)	K04514	EC:2.7.11.1	Rho associated coiled-coil containing protein kinase 1 [Source:HGNC Symbol;Acc:HGNC:10251]	5' UTR	-1.4	-2.14	-2.48	down	0.906635	-0.141406	0.277762	0.345988	down	no	1.96566	1.81427	3.22865	3.06143	3.01655	1.65234
chr2	103946669	103946759	91	ENSAPLG00000000901	ENSAPLT00000001141	203	USP14	GO:0004843(thiol-dependent ubiquitin-specific protease activity);GO:0004866(endopeptidase inhibitor activity);GO:0005515(protein binding);GO:0005829(cytosol);GO:0006511(ubiquitin-dependent protein catabolic process);GO:0007268(chemical synaptic transmission);GO:0009986(cell surface);GO:0016579(protein deubiquitination);GO:0031410(cytoplasmic vesicle);GO:0036459(thiol-dependent ubiquitinyl hydrola…	NA	NA	NA	ubiquitin specific peptidase 14 [Source:HGNC Symbol;Acc:HGNC:12612]	Exon (ENSAPLT00000001141/ENSAPLG00000000901, exon 2 of 16)	-1.67	-2.5	0.474	up	1.29248	0.370141	0.67708	0.738655	up	no	76.4724	65.2516	77.1396	51.5209	55.1709	62.6444
chr2	104283646	104283938	293	ENSAPLG00000028139	ENSAPLT00000036784	3475		GO:0005179(hormone activity);GO:0005576(extracellular region);GO:0007186(G protein-coupled receptor signaling pathway);GO:0016521(pituitary adenylate cyclase activating polypeptide activity);GO:0030073(insulin secretion);GO:0031858(pituitary adenylate cyclase-activating polypeptide receptor binding)	04911(Insulin secretion);04924(Renin secretion)	K05262	NA		3' UTR	-0.329	-0.527	2.55	up	inf	inf	1	1	up	no	0	0.671193	0	0	0	0
chr2	105268976	105269364	389	ENSAPLG00000022070	ENSAPLT00000022044	5011		GO:0005509(calcium ion binding)	04510(Focal adhesion);04530(Tight junction);04810(Regulation of actin cytoskeleton)	K12757	NA		3' UTR	-17.5	-19.7	-0.417	down	0.600893	-0.73482	9.94152e-05	0.000246331	down	no	191.972	178.07	132.294	245.906	326.729	263.347
chr2	105314634	105317101	2468	ENSAPLG00000010541	ENSAPLT00000025944	6675	TGIF1	GO:0000122(negative regulation of transcription by RNA polymerase II);GO:0000978(RNA polymerase II proximal promoter sequence-specific DNA binding);GO:0001227(DNA-binding transcription repressor activity, RNA polymerase II-specific);GO:0003677(DNA binding);GO:0005654(nucleoplasm);GO:0006355(regulation of transcription, DNA-templated);GO:0006355(regulation of transcription, DNA-templated)	04350(TGF-beta signaling pathway);04350(TGF-beta signaling pathway)	K19383	NA	TGFB induced factor homeobox 1 [Source:HGNC Symbol;Acc:HGNC:11776]	3' UTR	-5.25	-6.66	-0.268	down	2.14734	1.10255	0.000823043	0.00176562	up	yes	25.2819	23.2919	21.7689	9.85534	11.2328	11.6698
chr2	107595452	107595602	151	ENSAPLG00000024129	ENSAPLT00000039468	26981	ANKRD12	GO:0005515(protein binding);GO:0005654(nucleoplasm);GO:0005829(cytosol);GO:0005829(cytosol)	NA	NA	NA	ankyrin repeat domain 12 [Source:HGNC Symbol;Acc:HGNC:29135]	Exon (ENSAPLT00000039468/ENSAPLG00000024129, exon 8 of 8)	-0.546	-0.928	3.17	up	0.479396	-1.06071	0.0021022	0.0042302	down	yes	0.546524	0.652237	1.20898	2.42045	1.49746	1.10453
chr2	107595781	107596320	540	ENSAPLG00000024129	ENSAPLT00000039468	27310	ANKRD12	GO:0005515(protein binding);GO:0005654(nucleoplasm);GO:0005829(cytosol);GO:0005829(cytosol)	NA	NA	NA	ankyrin repeat domain 12 [Source:HGNC Symbol;Acc:HGNC:29135]	Exon (ENSAPLT00000039468/ENSAPLG00000024129, exon 8 of 8)	-0.54	-0.918	-1.76	down	0.479396	-1.06071	0.0021022	0.0042302	down	yes	0.546524	0.652237	1.20898	2.42045	1.49746	1.10453
chr2	107596858	107597067	210	ENSAPLG00000024129	ENSAPLT00000039468	28387	ANKRD12	GO:0005515(protein binding);GO:0005654(nucleoplasm);GO:0005829(cytosol);GO:0005829(cytosol)	NA	NA	NA	ankyrin repeat domain 12 [Source:HGNC Symbol;Acc:HGNC:29135]	Exon (ENSAPLT00000039468/ENSAPLG00000024129, exon 8 of 8)	-2.48	-3.48	-4.78	down	0.479396	-1.06071	0.0021022	0.0042302	down	yes	0.546524	0.652237	1.20898	2.42045	1.49746	1.10453
chr2	107611037	107611186	150	ENSAPLG00000024129	ENSAPLT00000029914	42566	ANKRD12	GO:0005515(protein binding);GO:0005654(nucleoplasm);GO:0005829(cytosol);GO:0005829(cytosol)	NA	NA	NA	ankyrin repeat domain 12 [Source:HGNC Symbol;Acc:HGNC:29135]	3' UTR	-0.5	-0.845	0.802	up	0.479396	-1.06071	0.0021022	0.0042302	down	yes	0.546524	0.652237	1.20898	2.42045	1.49746	1.10453
chr2	107970607	107970786	180	ENSAPLG00000019634	ENSAPLT00000048315	0		NA	NA	NA	NA		Exon (ENSAPLT00000045668/ENSAPLG00000019634, exon 3 of 3)	-0.276	-0.403	2.32	up	inf	inf	1	1	up	no	0.158924	0	0.0398907	0	0	0
chr2	108972898	108976133	3236	ENSAPLG00000011917	ENSAPLT00000012404	5969	CIDEA	GO:0001659(temperature homeostasis);GO:0005622(intracellular);GO:0005634(nucleus);GO:0005737(cytoplasm);GO:0005739(mitochondrion);GO:0005740(mitochondrial envelope);GO:0005811(lipid droplet);GO:0006629(lipid metabolic process);GO:0006915(apoptotic process);GO:0008219(cell death);GO:0010890(positive regulation of sequestering of triglyceride);GO:0019915(lipid storage);GO:0030512(negative regulatio…	04210(Apoptosis)	K02310	NA	cell death inducing DFFA like effector a [Source:HGNC Symbol;Acc:HGNC:1976]	Exon (ENSAPLT00000012404/ENSAPLG00000011917, exon 4 of 5)	-2.27	-3.23	-1.22	down	0.686643	-0.542367	0.249397	0.315489	down	no	4.26396	3.82334	2.92554	2.95575	9.25632	3.82658
chr2	109379603	109380763	1161	ENSAPLG00000003339	ENSAPLT00000003463	12424	RB1CC1	GO:0000045(autophagosome assembly);GO:0000407(phagophore assembly site);GO:0000422(autophagy of mitochondrion);GO:0001889(liver development);GO:0001934(positive regulation of protein phosphorylation);GO:0005634(nucleus);GO:0005764(lysosome);GO:0005829(cytosol);GO:0006914(autophagy);GO:0007507(heart development);GO:0019901(protein kinase binding);GO:0031965(nuclear membrane);GO:0034045(phagophore …	04140(Autophagy - animal)	K17589	NA	RB1 inducible coiled-coil 1 [Source:HGNC Symbol;Acc:HGNC:15574]	Exon (ENSAPLT00000003463/ENSAPLG00000003339, exon 4 of 15)	-0.438	-0.737	-2.49	down	0.677732	-0.561214	0.261036	0.327923	down	no	0.825073	0.388051	0.487612	1.09367	1.08525	0.33054
chr2	112625538	112626715	1178	ENSAPLG00000026483	ENSAPLT00000026288	535		NA	NA	NA	NA		Exon (ENSAPLT00000026288/ENSAPLG00000026483, exon 1 of 2)	-0.403	-0.674	-1.82	down	18.5191	4.21094	0.00248063	0.00493022	up	yes	0.193111	0.522703	0.527665	0	0.0671457	0
chr2	113111753	113122093	10341	ENSAPLG00000006848	ENSAPLT00000007115	85416	GAREM1	GO:0007173(epidermal growth factor receptor signaling pathway);GO:0008284(positive regulation of cell population proliferation);GO:0070064(proline-rich region binding);GO:0070374(positive regulation of ERK1 and ERK2 cascade);GO:0071364(cellular response to epidermal growth factor stimulus)	NA	NA	NA	GRB2 associated regulator of MAPK1 subtype 1 [Source:HGNC Symbol;Acc:HGNC:26136]	3' UTR	-1.02	-1.63	-0.535	down	10.6054	3.40672	1.6568e-11	8.6703e-11	up	yes	9.66	8.29409	11.5422	0.398228	1.12659	1.25644
chr2	115239912	115240720	809	ENSAPLG00000018165	ENSAPLT00000026268	99369	CHST9	GO:0001537(N-acetylgalactosamine 4-O-sulfotransferase activity);GO:0006790(sulfur compound metabolic process);GO:0008146(sulfotransferase activity);GO:0016021(integral component of membrane);GO:0016051(carbohydrate biosynthetic process)	NA	NA	NA	carbohydrate sulfotransferase 9 [Source:HGNC Symbol;Acc:HGNC:19898]	Exon (ENSAPLT00000026268/ENSAPLG00000018165, exon 4 of 4)	-8.53	-10.2	-1.09	down	0.525497	-0.928246	0.00106088	0.00223543	down	no	2.53963	2.2814	3.25535	4.01943	5.39555	5.95406
chr2	118386799	118387911	1113	ENSAPLG00000007581	ENSAPLT00000007860	0	FAM110B	GO:0005739(mitochondrion);GO:0005829(cytosol)	NA	NA	NA	family with sequence similarity 110 member B [Source:HGNC Symbol;Acc:HGNC:28587]	Exon (ENSAPLT00000007860/ENSAPLG00000007581, exon 1 of 1)	-8.72	-10.5	-0.408	down	2.56676	1.35995	1.83457e-05	4.99787e-05	up	yes	45.8329	53.1504	65.7016	19.8841	22.8626	21.4139
chr2	119333082	119333229	148	ENSAPLG00000005615	ENSAPLT00000005821	46761	RAB2A	GO:0003924(GTPase activity);GO:0005525(GTP binding);GO:0005794(Golgi apparatus);GO:0007030(Golgi organization);GO:0019003(GDP binding)	NA	NA	NA	RAB2A, member RAS oncogene family [Source:HGNC Symbol;Acc:HGNC:9763]	3' UTR	-3.54	-4.73	-0.326	down	1.21939	0.28616	0.889394	0.915187	up	no	95.5198	101.114	99.8948	79.6311	90.5435	73.0029
chr2	119464934	119466800	1867	ENSAPLG00000005873	ENSAPLT00000006263	115656	CHD7	GO:0000978(RNA polymerase II proximal promoter sequence-specific DNA binding);GO:0001501(skeletal system development);GO:0001568(blood vessel development);GO:0001701(in utero embryonic development);GO:0001974(blood vessel remodeling);GO:0003007(heart morphogenesis);GO:0003222(ventricular trabecula myocardium morphogenesis);GO:0003226(right ventricular compact myocardium morphogenesis);GO:0005515(…	NA	NA	NA	chromodomain helicase DNA binding protein 7 [Source:HGNC Symbol;Acc:HGNC:20626]	Exon (ENSAPLT00000006263/ENSAPLG00000005873, exon 26 of 39)	-1.49	-2.26	-0.923	down	0.346321	-1.52982	1.0314e-07	3.65198e-07	down	yes	1.03285	1.59783	2.87885	5.38081	6.6665	3.86143
chr2	120305223	120305372	150	ENSAPLG00000024234	ENSAPLT00000021798	196618	NKAIN3	NA	NA	NA	NA	sodium/potassium transporting ATPase interacting 3 [Source:HGNC Symbol;Acc:HGNC:26829]	3' UTR	-0.409	-0.686	-2.43	down	0.936659	-0.094404	0.700081	0.758747	down	no	0.158548	0.528547	0.452227	0.64426	0.17771	0.394397
chr2	121388311	121390088	1778	ENSAPLG00000002927	ENSAPLT00000035687	19253	MTFR1	GO:0005739(mitochondrion);GO:0005829(cytosol);GO:0005886(plasma membrane);GO:0009060(aerobic respiration);GO:0009060(aerobic respiration)	NA	NA	NA	mitochondrial fission regulator 1 [Source:HGNC Symbol;Acc:HGNC:29510]	3' UTR	-2.93	-4.02	0.483	up	0.886588	-0.173664	0.0442151	0.0684644	down	no	27.45	24.7347	36.6381	35.9595	32.6175	31.6079
chr2	124130820	124131029	210	ENSAPLG00000021469	ENSAPLT00000035145	9350	KCNB2	GO:0005216(ion channel activity);GO:0005249(voltage-gated potassium channel activity);GO:0005515(protein binding);GO:0006811(ion transport);GO:0006813(potassium ion transport);GO:0008076(voltage-gated potassium channel complex);GO:0016020(membrane);GO:0051260(protein homooligomerization);GO:0055085(transmembrane transport)	NA	NA	NA	potassium voltage-gated channel subfamily B member 2 [Source:HGNC Symbol;Acc:HGNC:6232]	Exon (ENSAPLT00000035145/ENSAPLG00000021469, exon 2 of 3)	-0.358	-0.585	-3.17	down	0.206082	-2.27871	1	1	down	no	0	0	0.060277	0	0.044668	0.247823
chr2	126251226	126251795	570	ENSAPLG00000012910	ENSAPLT00000013439	123671	ZFHX4	GO:0003676(nucleic acid binding);GO:0003677(DNA binding);GO:0006355(regulation of transcription, DNA-templated);GO:0008270(zinc ion binding);GO:0043565(sequence-specific DNA binding)	NA	NA	NA	zinc finger homeobox 4 [Source:HGNC Symbol;Acc:HGNC:30939]	Exon (ENSAPLT00000013439/ENSAPLG00000012910, exon 9 of 9)	-2.57	-3.6	-1.12	down	0.698458	-0.517756	0.174318	0.229864	down	no	0.218028	0.317993	0.61529	0.912981	0.320824	0.414557
chr2	128246710	128254781	8072	ENSAPLG00000029536	ENSAPLT00000037860	90	CHMP4C	GO:0006997(nucleus organization);GO:0007034(vacuolar transport);GO:0007080(mitotic metaphase plate congression);GO:0009838(abscission);GO:0010824(regulation of centrosome duplication);GO:0030496(midbody);GO:0032466(negative regulation of cytokinesis);GO:0042803(protein homodimerization activity);GO:0044878(mitotic cytokinesis checkpoint);GO:0050792(regulation of viral process);GO:0061952(midbody …	04144(Endocytosis);04217(Necroptosis)	K12194	NA	charged multivesicular body protein 4C [Source:HGNC Symbol;Acc:HGNC:30599]	Exon (ENSAPLT00000037860/ENSAPLG00000029536, exon 1 of 5)	-0.598	-1.01	-0.633	down	0.795145	-0.330709	0.158561	0.211873	down	no	1.80998	1.77885	3.83239	3.49189	2.9878	2.85347
chr2	129598183	129598604	422	ENSAPLG00000015947	ENSAPLT00000016663	5614	LRRCC1	GO:0005515(protein binding);GO:0005813(centrosome)	NA	NA	NA	leucine rich repeat and coiled-coil centrosomal protein 1 [Source:HGNC Symbol;Acc:HGNC:29373]	Exon (ENSAPLT00000016663/ENSAPLG00000015947, exon 8 of 19)	-0.832	-1.37	-2.13	down	1.4913	0.576574	0.641868	0.704956	up	no	0.976359	0.729584	2.12656	1.17831	0.726651	0.664942
chr2	131755922	131894915	138994	ENSAPLG00000009857	ENSAPLT00000010263	89579	TRPS1	GO:0000122(negative regulation of transcription by RNA polymerase II);GO:0000790(nuclear chromatin);GO:0000977(RNA polymerase II regulatory region sequence-specific DNA binding);GO:0001501(skeletal system development);GO:0003676(nucleic acid binding);GO:0003700(DNA-binding transcription factor activity);GO:0005634(nucleus);GO:0005654(nucleoplasm);GO:0006355(regulation of transcription, DNA-templa…	NA	NA	NA	transcriptional repressor GATA binding 1 [Source:HGNC Symbol;Acc:HGNC:12340]	Exon (ENSAPLT00000010263/ENSAPLG00000009857, exon 5 of 7)	-0.685	-1.15	-1.55	down	7.39868	2.88727	6.43724e-07	2.07507e-06	up	yes	2.17317	3.90766	2.63671	0.786837	0.235094	0.156325
chr2	131899681	131900728	1048	ENSAPLG00000009857	ENSAPLT00000010263	233338	TRPS1	GO:0000122(negative regulation of transcription by RNA polymerase II);GO:0000790(nuclear chromatin);GO:0000977(RNA polymerase II regulatory region sequence-specific DNA binding);GO:0001501(skeletal system development);GO:0003676(nucleic acid binding);GO:0003700(DNA-binding transcription factor activity);GO:0005634(nucleus);GO:0005654(nucleoplasm);GO:0006355(regulation of transcription, DNA-templa…	NA	NA	NA	transcriptional repressor GATA binding 1 [Source:HGNC Symbol;Acc:HGNC:12340]	3' UTR	-2.79	-3.85	-1.6	down	7.39868	2.88727	6.43724e-07	2.07507e-06	up	yes	2.17317	3.90766	2.63671	0.786837	0.235094	0.156325
chr2	131900847	131901087	241	ENSAPLG00000009857	ENSAPLT00000040036	170021	TRPS1	GO:0000122(negative regulation of transcription by RNA polymerase II);GO:0000790(nuclear chromatin);GO:0000977(RNA polymerase II regulatory region sequence-specific DNA binding);GO:0001501(skeletal system development);GO:0003676(nucleic acid binding);GO:0003700(DNA-binding transcription factor activity);GO:0005634(nucleus);GO:0005654(nucleoplasm);GO:0006355(regulation of transcription, DNA-templa…	NA	NA	NA	transcriptional repressor GATA binding 1 [Source:HGNC Symbol;Acc:HGNC:12340]	3' UTR	-0.769	-1.28	-2.68	down	7.39868	2.88727	6.43724e-07	2.07507e-06	up	yes	2.17317	3.90766	2.63671	0.786837	0.235094	0.156325
chr2	134373581	134373941	361	ENSAPLG00000002909	ENSAPLT00000002937	8815	KCNV1	GO:0005216(ion channel activity);GO:0005249(voltage-gated potassium channel activity);GO:0005515(protein binding);GO:0006811(ion transport);GO:0006813(potassium ion transport);GO:0008076(voltage-gated potassium channel complex);GO:0016020(membrane);GO:0051260(protein homooligomerization);GO:0055085(transmembrane transport)	NA	NA	NA	potassium voltage-gated channel modifier subfamily V member 1 [Source:HGNC Symbol;Acc:HGNC:18861]	3' UTR	-0.564	-0.957	-0.78	down	1.59304	0.671786	0.594762	0.661951	up	no	1.00585	1.38017	1.53911	0.325315	1.38794	0.750668
chr2	137523626	137523686	61	ENSAPLG00000004191	ENSAPLT00000004415	569		GO:0008270(zinc ion binding);GO:0043130(ubiquitin binding);GO:0043130(ubiquitin binding)	04120(Ubiquitin mediated proteolysis);04120(Ubiquitin mediated proteolysis)	K10593	EC:2.3.2.26		5' UTR	-0.78	-1.3	-0.771	down	0.329557	-1.6014	1.46986e-08	5.73555e-08	down	yes	1.48064	1.25677	2.14445	6.44856	5.55011	2.81469
chr2	137678854	137679717	864	ENSAPLG00000020535	ENSAPLT00000023995	710		NA	NA	NA	NA		Exon (ENSAPLT00000023995/ENSAPLG00000020535, exon 1 of 2)	-0.346	-0.561	0.958	up	7.58522	2.92319	0.00186838	0.0037891	up	yes	1.73602	1.07605	1.43927	0.389601	0.078196	0.09268
chr2	137795262	137795582	321	ENSAPLG00000009495	ENSAPLT00000009886	0	NCALD	GO:0003073(regulation of systemic arterial blood pressure);GO:0003779(actin binding);GO:0005509(calcium ion binding);GO:0015631(tubulin binding);GO:0019722(calcium-mediated signaling);GO:0030276(clathrin binding)	04740(Olfactory transduction)	K19695	NA	neurocalcin delta [Source:HGNC Symbol;Acc:HGNC:7655]	Exon (ENSAPLT00000009886/ENSAPLG00000009495, exon 1 of 3)	-0.556	-0.944	0.595	up	9.41927	3.23562	6.11853e-08	2.22495e-07	up	yes	21.6198	13.4767	25.9697	2.21174	3.30096	0.970414
chr2	137943336	137943423	88	ENSAPLG00000022331	ENSAPLT00000046556	86	ZNF706	NA	NA	NA	NA	zinc finger protein 706 [Source:HGNC Symbol;Acc:HGNC:24992]	Exon (ENSAPLT00000046556/ENSAPLG00000022331, exon 1 of 3)	-0.883	-1.44	0.537	up	0.354771	-1.49504	4.8112e-14	3.07209e-13	down	yes	93.4395	97.3868	83.188	253.739	260.337	258.293
chr2	139868610	139878551	9942	ENSAPLG00000012750	ENSAPLT00000013292	0	MTERF3	GO:0003690(double-stranded DNA binding);GO:0005654(nucleoplasm);GO:0005739(mitochondrion);GO:0006355(regulation of transcription, DNA-templated);GO:0044212(transcription regulatory region DNA binding);GO:0045892(negative regulation of transcription, DNA-templated)	NA	NA	NA	mitochondrial transcription termination factor 3 [Source:HGNC Symbol;Acc:HGNC:24258]	5' UTR	-2.18	-3.13	-0.213	down	1.50389	0.588696	0.142463	0.192806	up	no	67.5561	67.4313	60.3052	46.0426	40.8626	42.9533
chr2	139887458	139890786	3329	ENSAPLG00000012746	ENSAPLT00000013262	444	UQCRB	GO:0005750(mitochondrial respiratory chain complex III);GO:0006122(mitochondrial electron transport, ubiquinol to cytochrome c)	00190(Oxidative phosphorylation);04260(Cardiac muscle contraction)	K00417	NA	ubiquinol-cytochrome c reductase binding protein [Source:HGNC Symbol;Acc:HGNC:12582]	Exon (ENSAPLT00000013262/ENSAPLG00000012746, exon 1 of 4)	-25.8	-28.4	0.558	up	0.265587	-1.91275	1.21716e-19	1.11609e-18	down	yes	33.3998	40.0232	37.5446	142.529	160.611	114.681
chr2	140581476	140581596	121	ENSAPLG00000014267	ENSAPLT00000014889	23475	VIRMA	GO:0005654(nucleoplasm);GO:0005829(cytosol);GO:0016604(nuclear body);GO:0016607(nuclear speck);GO:0036396(RNA N6-methyladenosine methyltransferase complex);GO:0080009(mRNA methylation);GO:0110104(mRNA alternative polyadenylation);GO:0110104(mRNA alternative polyadenylation)	NA	NA	NA	vir like m6A methyltransferase associated [Source:HGNC Symbol;Acc:HGNC:24500]	Exon (ENSAPLT00000014889/ENSAPLG00000014267, exon 24 of 24)	-1.12	-1.76	-0.542	down	1.02856	0.040619	0.348579	0.419865	up	no	10.4918	7.49427	9.995	8.8814	8.74266	9.58018
chr2	140602298	140635363	33066	ENSAPLG00000014488	ENSAPLT00000015087	0		NA	03440(Homologous recombination)	K10877	EC:3.6.4.-		Exon (ENSAPLT00000015014/ENSAPLG00000014366, exon 2 of 14)	-1.38	-2.12	-0.759	down	1.84883	0.886616	0.305549	0.375795	up	no	4.10968	6.34344	6.11758	2.48159	2.2922	4.18899
chr2	140692808	140692868	61	ENSAPLG00000014490	ENSAPLT00000015110	6454	GEM	GO:0000278(mitotic cell cycle);GO:0000287(magnesium ion binding);GO:0003924(GTPase activity);GO:0005525(GTP binding);GO:0005634(nucleus);GO:0007165(signal transduction);GO:0009898(cytoplasmic side of plasma membrane);GO:0016020(membrane);GO:0019003(GDP binding);GO:0030496(midbody);GO:0051233(spindle midzone);GO:0051276(chromosome organization);GO:0051310(metaphase plate congression);GO:0072686(mi…	NA	NA	NA	GTP binding protein overexpressed in skeletal muscle [Source:HGNC Symbol;Acc:HGNC:4234]	3' UTR	-0.405	-0.679	-0.7	down	0.879718	-0.184887	0.0882539	0.126736	down	no	11.1905	10.9675	15.5167	14.5478	13.9513	14.3268
chr2	142807503	142817500	9998	ENSAPLG00000014888	ENSAPLT00000015516	5600	MED30	GO:0003712(transcription coregulator activity);GO:0005634(nucleus);GO:0006367(transcription initiation from RNA polymerase II promoter);GO:0016592(mediator complex);GO:0019827(stem cell population maintenance);GO:0045893(positive regulation of transcription, DNA-templated);GO:0046966(thyroid hormone receptor binding)	NA	NA	NA	mediator complex subunit 30 [Source:HGNC Symbol;Acc:HGNC:23032]	Exon (ENSAPLT00000015516/ENSAPLG00000014888, exon 3 of 4)	-1.58	-2.38	-0.291	down	1.57604	0.656301	0.148685	0.199997	up	no	68.6207	67.9186	56.3045	42.862	37.2988	42.1992
chr2	143431015	143431523	509	ENSAPLG00000019811	ENSAPLT00000019169	17221	COLEC10	GO:0005537(mannose binding);GO:0005615(extracellular space);GO:0005737(cytoplasm);GO:0042056(chemoattractant activity);GO:1904888(cranial skeletal system development)	NA	NA	NA	collectin subfamily member 10 [Source:HGNC Symbol;Acc:HGNC:2220]	3' UTR	-2.83	-3.9	-1.29	down	0.282511	-1.82362	7.15468e-05	0.00018097	down	yes	0.516183	0.818676	1.07823	2.84339	3.44257	2.2556
chr2	143460304	143460837	534	ENSAPLG00000018801	ENSAPLT00000040012	11103	MAL2	GO:0016020(membrane);GO:0045056(transcytosis);GO:0045121(membrane raft)	NA	NA	NA	mal, T cell differentiation protein 2 (gene/pseudogene) [Source:HGNC Symbol;Acc:HGNC:13634]	3' UTR	-0.381	-0.63	-1.74	down	inf	inf	6.21756e-58	2.72018e-56	up	yes	11.4719	10.4661	9.24584	0	0	0
chr2	145036716	145037069	354	ENSAPLG00000010979	ENSAPLT00000011424	8825	FAM83A	GO:0007173(epidermal growth factor receptor signaling pathway);GO:0008283(cell population proliferation);GO:0019901(protein kinase binding);GO:0036312(phosphatidylinositol 3-kinase regulatory subunit binding)	NA	NA	NA	family with sequence similarity 83 member A [Source:HGNC Symbol;Acc:HGNC:28210]	Exon (ENSAPLT00000011424/ENSAPLG00000010979, exon 4 of 5)	-0.685	-1.15	2.12	up	19.1383	4.25839	0.000106544	0.00026286	up	yes	4.58025	2.43488	5.16414	0.465512	0.17087	0
chr2	146787275	146787752	478	ENSAPLG00000013997	ENSAPLT00000014574	2314	MYC	GO:0003700(DNA-binding transcription factor activity);GO:0005634(nucleus);GO:0005654(nucleoplasm);GO:0006355(regulation of transcription, DNA-templated);GO:0046983(protein dimerization activity)	04010(MAPK signaling pathway);04012(ErbB signaling pathway);04310(Wnt signaling pathway);04350(TGF-beta signaling pathway);04110(Cell cycle);04218(Cellular senescence)	K04377	NA	MYC proto-oncogene, bHLH transcription factor [Source:HGNC Symbol;Acc:HGNC:7553]	Exon (ENSAPLT00000014574/ENSAPLG00000013997, exon 3 of 3)	-6.79	-8.36	-0.369	down	2.06832	1.04846	0.000375992	0.000850783	up	yes	62.2842	54.0523	62.7619	32.6941	29.0362	24.8609
chr2	148882507	148883319	813	ENSAPLG00000003781	ENSAPLT00000003890	46888	PHF20L1	GO:0005634(nucleus);GO:0006355(regulation of transcription, DNA-templated);GO:0006355(regulation of transcription, DNA-templated)	NA	NA	NA	PHD finger protein 20 like 1 [Source:HGNC Symbol;Acc:HGNC:24280]	Exon (ENSAPLT00000003890/ENSAPLG00000003781, exon 17 of 20)	-2.19	-3.14	-0.897	down	0.501767	-0.994911	0.000546324	0.00120478	down	no	2.43036	1.93744	4.37536	5.54185	7.80909	4.07382
chr2	149125117	149125384	268	ENSAPLG00000002582	ENSAPLT00000002626	35435	CCN4	GO:0005515(protein binding);GO:0005520(insulin-like growth factor binding);GO:0005576(extracellular region);GO:0005829(cytosol)	04371(Apelin signaling pathway)	K06827	NA	cellular communication network factor 4 [Source:HGNC Symbol;Acc:HGNC:12769]	3' UTR	-1.97	-2.87	-1.68	down	4.47217	2.16097	0.000129302	0.000315018	up	yes	5.31927	5.16003	4.47403	1.08778	1.07031	1.18555
chr2	154891347	154891466	120	ENSAPLG00000009536	ENSAPLT00000009922	104439	ADGRB1	GO:0001530(lipopolysaccharide binding);GO:0001786(phosphatidylserine binding);GO:0001891(phagocytic cup);GO:0004888(transmembrane signaling receptor activity);GO:0004930(G protein-coupled receptor activity);GO:0005615(extracellular space);GO:0005886(plasma membrane);GO:0005925(focal adhesion);GO:0006910(phagocytosis, recognition);GO:0006911(phagocytosis, engulfment);GO:0007166(cell surface recept…	04115(p53 signaling pathway)	K04596	NA	adhesion G protein-coupled receptor B1 [Source:HGNC Symbol;Acc:HGNC:943]	Exon (ENSAPLT00000009922/ENSAPLG00000009536, exon 17 of 17)	-0.593	-1.01	3.04	up	2.65878	1.41076	0.412862	0.485237	up	no	0.31798	0.386666	0.643651	0.507112	0	0
chr2	155319968	155321780	1813	ENSAPLG00000029276	ENSAPLT00000040625	1999	PSCA	GO:0005886(plasma membrane);GO:0033130(acetylcholine receptor binding);GO:0070373(negative regulation of ERK1 and ERK2 cascade);GO:0099601(regulation of neurotransmitter receptor activity)	NA	NA	NA	prostate stem cell antigen [Source:HGNC Symbol;Acc:HGNC:9500]	3' UTR	-0.547	-0.93	-2.2	down	inf	inf	1	1	up	no	0.338214	1.14804	0.225314	0	0	0
chr2	830680	832356	1677	ENSAPLG00000005814	ENSAPLT00000006042	31233	MYL3	GO:0002026(regulation of the force of heart contraction);GO:0003785(actin monomer binding);GO:0005509(calcium ion binding);GO:0006942(regulation of striated muscle contraction);GO:0031672(A band);GO:0031674(I band);GO:0055010(ventricular cardiac muscle tissue morphogenesis);GO:0060048(cardiac muscle contraction)	04371(Apelin signaling pathway);04260(Cardiac muscle contraction);04261(Adrenergic signaling in cardiomyocytes)	K12749	NA	myosin light chain 3 [Source:HGNC Symbol;Acc:HGNC:7584]	Exon (ENSAPLT00000006042/ENSAPLG00000005814, exon 5 of 6)	-0.283	-0.423	-1.68	down	1.5216	0.605591	0.694134	0.753225	up	no	1.79935	2.96704	5.88273	1.20735	3.04253	2.74873
chr2	1303416	1305670	2255	ENSAPLG00000004917	ENSAPLT00000005096	18453		GO:0005515(protein binding);GO:0005634(nucleus);GO:0018024(histone-lysine N-methyltransferase activity)	00310(Lysine degradation)	K11423	EC:2.1.1.43		Exon (ENSAPLT00000005096/ENSAPLG00000004917, exon 10 of 11)	-3.72	-4.93	-0.189	down	1.77641	0.828962	0.00841472	0.0152184	up	no	69.7281	67.9081	70.6716	38.3255	40.0596	38.8784
chr2	1684420	1684510	91	ENSAPLG00000014937	ENSAPLT00000015679	25245	SMARCC1	GO:0001741(XY body);GO:0003677(DNA binding);GO:0003682(chromatin binding);GO:0005515(protein binding);GO:0005634(nucleus);GO:0005654(nucleoplasm);GO:0005737(cytoplasm);GO:0006337(nucleosome disassembly);GO:0006338(chromatin remodeling);GO:0008286(insulin receptor signaling pathway);GO:0009887(animal organ morphogenesis);GO:0016514(SWI/SNF complex);GO:0032435(negative regulation of proteasomal ubi…	NA	NA	NA	SWI/SNF related, matrix associated, actin dependent regulator of chromatin subfamily c member 1 [Source:HGNC Symbol;Acc:HGNC:11104]	Exon (ENSAPLT00000015679/ENSAPLG00000014937, exon 11 of 28)	-62.7	-65.6	4.85	up	4.15305	2.05417	5.49504e-16	4.0153e-15	up	yes	225.664	205.045	258.69	56.975	55.049	53.9747
chr2	1735596	1735803	208	ENSAPLG00000023961	ENSAPLT00000031268	384		NA	NA	NA	NA		Exon (ENSAPLT00000031268/ENSAPLG00000023961, exon 1 of 1)	-2.53	-3.55	-1.4	down	1.74932	0.806796	1	1	up	no	0.2655	0.22432	0.384407	0.28281	0	0.216942
chr2	1783440	1785758	2319	ENSAPLG00000028437	ENSAPLT00000017725	40308		GO:0015631(tubulin binding);GO:0015631(tubulin binding)	NA	NA	NA		Exon (ENSAPLT00000017725/ENSAPLG00000028437, exon 12 of 17)	-13.1	-15.1	0.782	up	0.804894	-0.313129	0.0228041	0.0376724	down	no	119.849	129.171	105.593	119.734	147.637	173.201
chr2	1790011	1813917	23907	ENSAPLG00000028437	ENSAPLT00000017725	12149		GO:0015631(tubulin binding);GO:0015631(tubulin binding)	NA	NA	NA		Exon (ENSAPLT00000017725/ENSAPLG00000028437, exon 7 of 17)	-60.6	-63.5	-0.345	down	0.804894	-0.313129	0.0228041	0.0376724	down	no	119.849	129.171	105.593	119.734	147.637	173.201
chr2	2896454	2897262	809	ENSAPLG00000012358	ENSAPLT00000031279	25530	NKTR	GO:0000413(protein peptidyl-prolyl isomerization);GO:0003755(peptidyl-prolyl cis-trans isomerase activity);GO:0005654(nucleoplasm);GO:0005739(mitochondrion);GO:0005829(cytosol);GO:0005886(plasma membrane);GO:0006457(protein folding);GO:0016018(cyclosporin A binding);GO:0016018(cyclosporin A binding)	NA	NA	NA	natural killer cell triggering receptor [Source:HGNC Symbol;Acc:HGNC:7833]	Exon (ENSAPLT00000031279/ENSAPLG00000012358, exon 11 of 16)	-1.86	-2.73	-0.935	down	0.428593	-1.22232	4.24027e-05	0.000110759	down	yes	0.793663	0.976341	1.35883	3.11104	2.09692	2.09227
chr2	4384451	4386027	1577	ENSAPLG00000015638	ENSAPLT00000016326	17685	GARS	GO:0000166(nucleotide binding);GO:0004081(bis(5'-nucleosyl)-tetraphosphatase (asymmetrical) activity);GO:0004812(aminoacyl-tRNA ligase activity);GO:0004820(glycine-tRNA ligase activity);GO:0005524(ATP binding);GO:0005737(cytoplasm);GO:0005829(cytosol);GO:0006418(tRNA aminoacylation for protein translation);GO:0006426(glycyl-tRNA aminoacylation);GO:0015966(diadenosine tetraphosphate biosynthetic p…	00970(Aminoacyl-tRNA biosynthesis)	K01880	EC:6.1.1.14	glycyl-tRNA synthetase [Source:HGNC Symbol;Acc:HGNC:4162]	3' UTR	-11	-12.8	-0.317	down	2.46197	1.29981	1.42619e-05	3.94676e-05	up	yes	361.832	307.593	262.314	115.189	145.37	117.894
chr2	4979828	4979918	91	ENSAPLG00000000980	ENSAPLT00000021446	16280		GO:0003779(actin binding);GO:0007507(heart development);GO:0030036(actin cytoskeleton organization);GO:0030054(cell junction);GO:0030054(cell junction)	NA	NA	NA		Exon (ENSAPLT00000021446/ENSAPLG00000000980, exon 3 of 3)	-0.221	-0.259	-0.503	down	0.073238	-3.77126	7.10617e-23	7.94061e-22	down	yes	3.82525	9.22221	15.7134	156.252	107.375	129.078
chr2	5766354	5766678	325	ENSAPLG00000012196	ENSAPLT00000012712	21096	EXOG	GO:0003676(nucleic acid binding);GO:0004519(endonuclease activity);GO:0005743(mitochondrial inner membrane);GO:0008409(5'-3' exonuclease activity);GO:0016787(hydrolase activity);GO:0032991(protein-containing complex);GO:0046872(metal ion binding)	NA	NA	NA	exo/endonuclease G [Source:HGNC Symbol;Acc:HGNC:3347]	Exon (ENSAPLT00000012712/ENSAPLG00000012196, exon 6 of 6)	-2.63	-3.66	-0.762	down	3.44499	1.7845	2.58193e-07	8.73476e-07	up	yes	24.5281	28.998	30.425	8.73663	7.96011	7.67228
chr2	6291143	6291203	61	ENSAPLG00000013707	ENSAPLT00000014270	17660	WDR86	GO:0005515(protein binding)	NA	NA	NA	WD repeat domain 86 [Source:HGNC Symbol;Acc:HGNC:28020]	Exon (ENSAPLT00000014270/ENSAPLG00000013707, exon 6 of 6)	-0.324	-0.519	-0.504	down	14.4981	3.85779	8.52968e-31	1.37823e-29	up	yes	64.8786	65.0194	44.2705	4.04069	3.79704	4.17545
chr2	6340567	6348441	7875	ENSAPLG00000022733	ENSAPLT00000026064	31073	RHEB	GO:0000287(magnesium ion binding);GO:0003924(GTPase activity);GO:0005525(GTP binding);GO:0005681(spliceosomal complex);GO:0007165(signal transduction);GO:0014069(postsynaptic density);GO:0016020(membrane);GO:0019003(GDP binding);GO:0019901(protein kinase binding);GO:0032006(regulation of TOR signaling);GO:0032008(positive regulation of TOR signaling);GO:0048714(positive regulation of oligodendroc…	04150(mTOR signaling pathway);04140(Autophagy - animal);04218(Cellular senescence);04910(Insulin signaling pathway)	K07208	NA	Ras homolog, mTORC1 binding [Source:HGNC Symbol;Acc:HGNC:10011]	Exon (ENSAPLT00000026064/ENSAPLG00000022733, exon 5 of 8)	-2.65	-3.68	-0.33	down	0.997423	-0.00372215	0.284435	0.353065	down	no	90.7153	88.5467	86.5636	102.53	87.7033	76.2793
chr2	6751548	6751816	269	ENSAPLG00000018683	ENSAPLT00000022389	111985		GO:0006355(regulation of transcription, DNA-templated);GO:0042800(histone methyltransferase activity (H3-K4 specific));GO:0044666(MLL3/4 complex)	00310(Lysine degradation)	K09188	EC:2.1.1.43		Exon (ENSAPLT00000022389/ENSAPLG00000018683, exon 13 of 13)	-1.26	-1.96	1.64	up	0.28985	-1.78662	0.00070368	0.00152285	down	yes	0.611123	0.606968	0.446052	1.85951	2.17553	1.70635
chr2	8479787	8479934	148	ENSAPLG00000017997	ENSAPLT00000022674	17007	NA	NA	NA	NA	NA	NA	Exon (ENSAPLT00000025665/ENSAPLG00000028822, exon 2 of 2)	-0.264	-0.374	2.17	up	1	0	1	1	no	no	NA	NA	NA	NA	NA	NA
chr2	8480110	8480344	235	ENSAPLG00000017997	ENSAPLT00000022674	17330	NA	NA	NA	NA	NA	NA	Exon (ENSAPLT00000025665/ENSAPLG00000028822, exon 2 of 2)	-0.276	-0.403	2.09	up	1	0	1	1	no	no	NA	NA	NA	NA	NA	NA
chr2	13719870	13725778	5909	ENSAPLG00000013843	ENSAPLT00000030917	21333	CREM	GO:0000122(negative regulation of transcription by RNA polymerase II);GO:0000977(RNA polymerase II regulatory region sequence-specific DNA binding);GO:0003677(DNA binding);GO:0003700(DNA-binding transcription factor activity);GO:0005515(protein binding);GO:0005634(nucleus);GO:0006355(regulation of transcription, DNA-templated);GO:0006355(regulation of transcription, DNA-templated)	04261(Adrenergic signaling in cardiomyocytes);05166(HTLV-I infection);05166(HTLV-I infection)	K09052	NA	cAMP responsive element modulator [Source:HGNC Symbol;Acc:HGNC:2352]	Exon (ENSAPLT00000030917/ENSAPLG00000013843, exon 7 of 8)	-1.6	-2.41	-1.02	down	0.287501	-1.79836	1.63313e-05	4.48579e-05	down	yes	2.04116	1.61803	1.54328	6.93526	6.49534	4.66486
chr2	15158905	15159025	121	ENSAPLG00000007482	ENSAPLT00000026683	114652	ZEB1	GO:0000122(negative regulation of transcription by RNA polymerase II);GO:0001227(DNA-binding transcription repressor activity, RNA polymerase II-specific);GO:0003676(nucleic acid binding);GO:0003677(DNA binding);GO:0003682(chromatin binding);GO:0003700(DNA-binding transcription factor activity);GO:0005634(nucleus);GO:0005654(nucleoplasm);GO:0005667(transcription factor complex);GO:0005829(cytosol…	NA	NA	NA	zinc finger E-box binding homeobox 1 [Source:HGNC Symbol;Acc:HGNC:11642]	Exon (ENSAPLT00000026683/ENSAPLG00000007482, exon 7 of 9)	-0.384	-0.637	-0.9	down	0.225863	-2.14648	5.77816e-12	3.1466e-11	down	yes	1.10082	1.73888	1.64761	5.94478	9.52368	4.39896
chr2	15704973	15705421	449	ENSAPLG00000006380	ENSAPLT00000006606	8316	JCAD	GO:0005911(cell-cell junction);GO:0005912(adherens junction);GO:0032587(ruffle membrane);GO:0043410(positive regulation of MAPK cascade);GO:0048471(perinuclear region of cytoplasm);GO:0090050(positive regulation of cell migration involved in sprouting angiogenesis);GO:1900748(positive regulation of vascular endothelial growth factor signaling pathway);GO:1903589(positive regulation of blood vesse…	NA	NA	NA	junctional cadherin 5 associated [Source:HGNC Symbol;Acc:HGNC:29283]	Exon (ENSAPLT00000006606/ENSAPLG00000006380, exon 2 of 2)	-13.9	-15.9	-0.463	down	0.636231	-0.652377	2.27246e-05	6.11974e-05	down	no	40.6329	37.454	47.9642	61.9318	72.8672	63.3226
chr2	17966045	17966551	507	ENSAPLG00000007810	ENSAPLT00000008134	126391	KIAA1217	GO:0048706(embryonic skeletal system development)	NA	NA	NA	KIAA1217 [Source:HGNC Symbol;Acc:HGNC:25428]	Exon (ENSAPLT00000008134/ENSAPLG00000007810, exon 7 of 20)	-9.9	-11.7	0.345	up	0.98555	-0.0209988	0.195124	0.254664	down	no	58.8822	64.4575	62.4714	60.8229	67.2099	60.5025
chr2	20303833	20304253	421	ENSAPLG00000013189	ENSAPLT00000040164	76579	CACNB2	GO:0005245(voltage-gated calcium channel activity);GO:0005515(protein binding);GO:0005891(voltage-gated calcium channel complex);GO:0007268(chemical synaptic transmission);GO:0007601(visual perception);GO:0008331(high voltage-gated calcium channel activity);GO:0051015(actin filament binding);GO:0051928(positive regulation of calcium ion transport);GO:0070509(calcium ion import);GO:0070588(calcium…	04010(MAPK signaling pathway);04260(Cardiac muscle contraction);04261(Adrenergic signaling in cardiomyocytes);04261(Adrenergic signaling in cardiomyocytes)	K04863	NA	calcium voltage-gated channel auxiliary subunit beta 2 [Source:HGNC Symbol;Acc:HGNC:1402]	Exon (ENSAPLT00000040164/ENSAPLG00000013189, exon 12 of 12)	-1.57	-2.36	-1.16	down	0.963222	-0.0540596	0.677971	0.739494	down	no	0.713693	1.07035	1.16745	0.130996	1.45752	1.47567
chr2	24874105	24875386	1282	ENSAPLG00000017562	ENSAPLT00000018144	0	TFPI2	GO:0004867(serine-type endopeptidase inhibitor activity);GO:0005576(extracellular region);GO:0010466(negative regulation of peptidase activity);GO:0030414(peptidase inhibitor activity);GO:0030414(peptidase inhibitor activity)	04610(Complement and coagulation cascades);04610(Complement and coagulation cascades)	K03909	NA	tissue factor pathway inhibitor 2 [Source:HGNC Symbol;Acc:HGNC:11761]	Exon (ENSAPLT00000018144/ENSAPLG00000017562, exon 1 of 4)	-0.636	-1.08	0.617	up	0.299352	-1.74008	1.494e-08	5.82536e-08	down	yes	3.31821	4.56392	7.50591	16.9051	20.3775	14.1219
chr2	27914275	27915011	737	ENSAPLG00000016250	ENSAPLT00000016951	0	NDUFA4	GO:0004129(cytochrome-c oxidase activity);GO:0005739(mitochondrion);GO:0005747(mitochondrial respiratory chain complex I);GO:0005751(mitochondrial respiratory chain complex IV);GO:0044877(protein-containing complex binding)	00190(Oxidative phosphorylation)	K03948	NA	NDUFA4, mitochondrial complex associated [Source:HGNC Symbol;Acc:HGNC:7687]	Exon (ENSAPLT00000016951/ENSAPLG00000016250, exon 1 of 4)	-13.9	-15.9	0.349	up	0.650086	-0.621297	0.000632781	0.00137924	down	no	1618.3	1662.02	1293.32	1836.65	2637.8	2561
chr2	28304578	28304847	270	ENSAPLG00000005027	ENSAPLT00000005201	112139	THSD7A	GO:0005886(plasma membrane)	04310(Wnt signaling pathway)	K04512	NA	thrombospondin type 1 domain containing 7A [Source:HGNC Symbol;Acc:HGNC:22207]	Exon (ENSAPLT00000005201/ENSAPLG00000005027, exon 3 of 16)	-0.392	-0.653	-2	down	1.29848	0.376819	1	1	up	no	0.083027	0.130504	0.025447	0.184045	0	0
chr2	28378833	28378923	91	ENSAPLG00000005027	ENSAPLT00000005201	38063	THSD7A	GO:0005886(plasma membrane)	04310(Wnt signaling pathway)	K04512	NA	thrombospondin type 1 domain containing 7A [Source:HGNC Symbol;Acc:HGNC:22207]	Exon (ENSAPLT00000005201/ENSAPLG00000005027, exon 2 of 16)	-0.298	-0.477	-2.32	down	1.29848	0.376819	1	1	up	no	0.083027	0.130504	0.025447	0.184045	0	0
chr2	29253383	29256089	2707	ENSAPLG00000007011	ENSAPLT00000007319	60964	ETV1	GO:0000978(RNA polymerase II proximal promoter sequence-specific DNA binding);GO:0001228(DNA-binding transcription activator activity, RNA polymerase II-specific);GO:0003700(DNA-binding transcription factor activity);GO:0005634(nucleus);GO:0006355(regulation of transcription, DNA-templated);GO:0006366(transcription by RNA polymerase II);GO:0007411(axon guidance);GO:0007517(muscle organ developmen…	NA	NA	NA	ETS variant 1 [Source:HGNC Symbol;Acc:HGNC:3490]	Exon (ENSAPLT00000007319/ENSAPLG00000007011, exon 10 of 11)	-2.33	-3.3	-1.12	down	2.23525	1.16044	0.060566	0.0908402	up	no	10.2693	7.81347	11.24	2.08477	8.05675	2.97683
chr2	31099403	31100671	1269	ENSAPLG00000009153	ENSAPLT00000009623	63283	SNX13	GO:0005769(early endosome);GO:0006886(intracellular protein transport);GO:0032266(phosphatidylinositol-3-phosphate binding);GO:0035091(phosphatidylinositol binding);GO:0043547(positive regulation of GTPase activity);GO:0043547(positive regulation of GTPase activity)	NA	NA	NA	sorting nexin 13 [Source:HGNC Symbol;Acc:HGNC:21335]	3' UTR	-3.66	-4.85	-0.938	down	0.65524	-0.609904	0.0251014	0.0410537	down	no	2.212	1.64852	3.95167	5.3553	4.0426	2.52473
chr2	31736298	31737722	1425	ENSAPLG00000026723	ENSAPLT00000029249	719		NA	NA	NA	NA		5' UTR	-1.12	-1.76	-0.398	down	20.1471	4.3325	3.19642e-27	4.4841e-26	up	yes	55.5132	28.005	29.3289	1.96282	2.13364	1.5047
chr2	36239098	36240148	1051	ENSAPLG00000004374	ENSAPLT00000004493	4427	FKBP14	GO:0005509(calcium ion binding)	NA	NA	NA	FKBP prolyl isomerase 14 [Source:HGNC Symbol;Acc:HGNC:18625]	Exon (ENSAPLT00000004493/ENSAPLG00000004374, exon 3 of 4)	-4.04	-5.3	-0.778	down	2.26901	1.18207	0.00560511	0.0104728	up	yes	31.2543	27.5923	50.4146	15.9206	17.0975	15.1355
chr2	36325438	36325978	541	ENSAPLG00000003680	ENSAPLT00000003801	17564	HACL1	GO:0000287(magnesium ion binding);GO:0001561(fatty acid alpha-oxidation);GO:0003824(catalytic activity);GO:0005102(signaling receptor binding);GO:0005777(peroxisome);GO:0016830(carbon-carbon lyase activity);GO:0030976(thiamine pyrophosphate binding);GO:0042802(identical protein binding);GO:0048037(cofactor binding);GO:0051259(protein complex oligomerization)	04146(Peroxisome)	K12261	EC:4.1.-.-	2-hydroxyacyl-CoA lyase 1 [Source:HGNC Symbol;Acc:HGNC:17856]	3' UTR	-2.24	-3.2	-1.45	down	0.27069	-1.88529	5.52569e-07	1.79921e-06	down	yes	5.39303	2.95325	2.64021	20.9144	11.3754	8.29728
chr2	37617076	37617225	150	ENSAPLG00000009362	ENSAPLT00000029467	328	SATB1	GO:0000122(negative regulation of transcription by RNA polymerase II);GO:0000785(chromatin);GO:0000977(RNA polymerase II regulatory region sequence-specific DNA binding);GO:0001227(DNA-binding transcription repressor activity, RNA polymerase II-specific);GO:0003677(DNA binding);GO:0003682(chromatin binding);GO:0003700(DNA-binding transcription factor activity);GO:0005634(nucleus);GO:0005654(nucle…	NA	NA	NA	SATB homeobox 1 [Source:HGNC Symbol;Acc:HGNC:10541]	5' UTR	-0.235	-0.288	-1.46	down	2.73347	1.45073	0.00175221	0.00357048	up	yes	3.6066	3.31507	6.21366	2.10275	1.39891	1.30372
chr2	43050236	43050296	61	ENSAPLG00000008589	ENSAPLT00000008934	1015	TRIM71	GO:0000932(P-body);GO:0005515(protein binding);GO:0008270(zinc ion binding);GO:0010608(posttranscriptional regulation of gene expression);GO:0017148(negative regulation of translation);GO:0030371(translation repressor activity);GO:0035196(production of miRNAs involved in gene silencing by miRNA);GO:0035198(miRNA binding);GO:0061158(3'-UTR-mediated mRNA destabilization)	NA	NA	NA	tripartite motif containing 71 [Source:HGNC Symbol;Acc:HGNC:32669]	Exon (ENSAPLT00000008934/ENSAPLG00000008589, exon 1 of 4)	-0.478	-0.806	-2.47	down	0.0452172	-4.46699	7.50428e-16	5.40695e-15	down	yes	0.070445	0.369842	0.192816	5.20115	3.78425	5.01599
chr2	43825072	43825549	478	ENSAPLG00000030137	ENSAPLT00000038510	20780	EAF1	GO:0006355(regulation of transcription, DNA-templated);GO:0032783(ELL-EAF complex)	NA	NA	NA	ELL associated factor 1 [Source:HGNC Symbol;Acc:HGNC:20907]	3' UTR	-1.82	-2.69	0.548	up	1.24678	0.318212	0.812172	0.852956	up	no	10.7572	10.4746	13.1823	12.5474	7.88108	7.17375
chr2	43826385	43826444	60	ENSAPLG00000030137	ENSAPLT00000038510	19885	EAF1	GO:0006355(regulation of transcription, DNA-templated);GO:0032783(ELL-EAF complex)	NA	NA	NA	ELL associated factor 1 [Source:HGNC Symbol;Acc:HGNC:20907]	3' UTR	-0.596	-1.01	-0.672	down	1.24678	0.318212	0.812172	0.852956	up	no	10.7572	10.4746	13.1823	12.5474	7.88108	7.17375
chr2	45664648	45666997	2350	ENSAPLG00000012218	ENSAPLT00000012717	17262	EXOSC7	GO:0000178(exosome (RNase complex));GO:0000178(exosome (RNase complex))	03018(RNA degradation);03018(RNA degradation)	K12589	NA	exosome component 7 [Source:HGNC Symbol;Acc:HGNC:28112]	3' UTR	-1.43	-2.18	-0.352	down	3.09378	1.62937	1.63363e-08	6.35778e-08	up	yes	88.722	85.6227	81.8423	30.2743	24.1439	28.3889
chr2	46769785	46770678	894	ENSAPLG00000000865	ENSAPLT00000000865	8656	ADNP2	GO:0003676(nucleic acid binding);GO:0003677(DNA binding);GO:0030182(neuron differentiation);GO:0030307(positive regulation of cell growth);GO:0034599(cellular response to oxidative stress);GO:0060548(negative regulation of cell death);GO:0071300(cellular response to retinoic acid)	NA	NA	NA	ADNP homeobox 2 [Source:HGNC Symbol;Acc:HGNC:23803]	Exon (ENSAPLT00000000865/ENSAPLG00000000865, exon 4 of 4)	-1.27	-1.98	0.255	up	2.07669	1.05429	0.000544744	0.00120156	up	yes	26.1605	22.1522	29.5024	14.4837	11.9127	11.0744
chr2	46816957	46818340	1384	ENSAPLG00000015438	ENSAPLT00000016083	0		GO:0016616(oxidoreductase activity, acting on the CH-OH group of donors, NAD or NADP as acceptor);GO:0051287(NAD binding);GO:0055114(oxidation-reduction process)	00620(Pyruvate metabolism);00630(Glyoxylate and dicarboxylate metabolism);00260(Glycine, serine and threonine metabolism)	K00049	EC:1.1.1.79;EC:1.1.1.81		5' UTR	-0.515	-0.873	0.753	up	16.2601	4.02327	0.00109354	0.00229768	up	yes	3.09022	4.19037	3.53552	0	0.146216	0.518976
chr2	46828148	46828236	89	ENSAPLG00000015366	ENSAPLT00000035518	5794		GO:0016616(oxidoreductase activity, acting on the CH-OH group of donors, NAD or NADP as acceptor);GO:0051287(NAD binding);GO:0055114(oxidation-reduction process);GO:0055114(oxidation-reduction process)	00620(Pyruvate metabolism);00630(Glyoxylate and dicarboxylate metabolism);00260(Glycine, serine and threonine metabolism);00260(Glycine, serine and threonine metabolism)	K00049	EC:1.1.1.79;EC:1.1.1.81		Exon (ENSAPLT00000035518/ENSAPLG00000015366, exon 6 of 6)	-0.361	-0.591	-0.885	down	0.460234	-1.11956	0.0152117	0.0260466	down	yes	1.61584	1.09383	1.58465	2.01769	3.32179	3.99125
chr2	46916300	46916689	390	ENSAPLG00000015168	ENSAPLT00000015812	20108	KCNG2	GO:0005216(ion channel activity);GO:0005249(voltage-gated potassium channel activity);GO:0005515(protein binding);GO:0006811(ion transport);GO:0006813(potassium ion transport);GO:0008076(voltage-gated potassium channel complex);GO:0016020(membrane);GO:0051260(protein homooligomerization);GO:0055085(transmembrane transport)	NA	NA	NA	potassium voltage-gated channel modifier subfamily G member 2 [Source:HGNC Symbol;Acc:HGNC:6249]	Exon (ENSAPLT00000015812/ENSAPLG00000015168, exon 2 of 2)	-0.977	-1.57	-1.09	down	0.017222	-5.85961	1.86294e-35	3.80889e-34	down	yes	0.116306	0.694698	0.525812	29.4492	22.9795	25.1941
chr2	47057964	47058113	150	ENSAPLG00000014757	ENSAPLT00000015393	31054	CTDP1	GO:0000922(spindle pole);GO:0001096(TFIIF-class transcription factor complex binding);GO:0004721(phosphoprotein phosphatase activity);GO:0005634(nucleus);GO:0005654(nucleoplasm);GO:0005813(centrosome);GO:0005819(spindle);GO:0006470(protein dephosphorylation);GO:0008420(RNA polymerase II CTD heptapeptide repeat phosphatase activity);GO:0010458(exit from mitosis);GO:0030496(midbody);GO:0030957(Tat …	NA	NA	NA	CTD phosphatase subunit 1 [Source:HGNC Symbol;Acc:HGNC:2498]	Exon (ENSAPLT00000015393/ENSAPLG00000014757, exon 8 of 13)	-1.12	-1.76	-1.21	down	0.774769	-0.368161	0.13011	0.178405	down	no	1.88741	2.03999	3.2627	3.58788	4.11726	1.57516
chr2	49514331	49552349	38019	ENSAPLG00000018458	ENSAPLT00000037879	0		NA	NA	NA	NA		Exon (ENSAPLT00000037879/ENSAPLG00000018458, exon 1 of 1)	-14.1	-16.1	-0.601	down	5.22581	2.38565	6.81381e-16	4.92665e-15	up	yes	101.507	79.3307	121.52	16.3926	24.8251	16.6407
chr2	49691366	49691515	150	ENSAPLG00000005820	ENSAPLT00000006034	415120	CDKAL1	GO:0003824(catalytic activity);GO:0005783(endoplasmic reticulum);GO:0005791(rough endoplasmic reticulum);GO:0006400(tRNA modification);GO:0016740(transferase activity);GO:0035598(N6-threonylcarbomyladenosine methylthiotransferase activity);GO:0035600(tRNA methylthiolation);GO:0051536(iron-sulfur cluster binding);GO:0051539(4 iron, 4 sulfur cluster binding);GO:1990145(maintenance of translational …	NA	NA	NA	CDK5 regulatory subunit associated protein 1 like 1 [Source:HGNC Symbol;Acc:HGNC:21050]	Exon (ENSAPLT00000029323/ENSAPLG00000005820, exon 16 of 16)	-2.24	-3.2	-1.59	down	1.17457	0.232138	0.943488	0.957962	up	no	7.99091	6.70592	10.1488	9.16693	6.94884	5.03712
chr2	52165065	52170132	5068	ENSAPLG00000029862	ENSAPLT00000042850	1762	ATXN1	GO:0003723(RNA binding);GO:0005515(protein binding);GO:0005634(nucleus);GO:0005654(nucleoplasm);GO:0005730(nucleolus);GO:0005737(cytoplasm);GO:0005829(cytosol);GO:0008022(protein C-terminus binding);GO:0008266(poly(U) RNA binding);GO:0016363(nuclear matrix);GO:0034046(poly(G) binding);GO:0042405(nuclear inclusion body);GO:0042802(identical protein binding);GO:0043621(protein self-association);GO:…	NA	NA	NA	ataxin 1 [Source:HGNC Symbol;Acc:HGNC:10548]	Exon (ENSAPLT00000042850/ENSAPLG00000029862, exon 1 of 2)	-0.769	-1.28	-0.493	down	1.20551	0.269641	0.98123	0.986965	up	no	2.01071	1.52546	2.26583	1.76236	1.22685	1.82371
chr2	52170790	52170880	91	ENSAPLG00000029862	ENSAPLT00000042850	1014	ATXN1	GO:0003723(RNA binding);GO:0005515(protein binding);GO:0005634(nucleus);GO:0005654(nucleoplasm);GO:0005730(nucleolus);GO:0005737(cytoplasm);GO:0005829(cytosol);GO:0008022(protein C-terminus binding);GO:0008266(poly(U) RNA binding);GO:0016363(nuclear matrix);GO:0034046(poly(G) binding);GO:0042405(nuclear inclusion body);GO:0042802(identical protein binding);GO:0043621(protein self-association);GO:…	NA	NA	NA	ataxin 1 [Source:HGNC Symbol;Acc:HGNC:10548]	Exon (ENSAPLT00000042850/ENSAPLG00000029862, exon 1 of 2)	-0.29	-0.439	0.9	up	1.20551	0.269641	0.98123	0.986965	up	no	2.01071	1.52546	2.26583	1.76236	1.22685	1.82371
chr2	54052399	54053511	1113	ENSAPLG00000025569	ENSAPLT00000030826	3959	IGFBP1	GO:0005520(insulin-like growth factor binding);GO:0005576(extracellular region);GO:0005615(extracellular space);GO:0005794(Golgi apparatus);GO:0031994(insulin-like growth factor I binding);GO:0031995(insulin-like growth factor II binding)	04115(p53 signaling pathway);04218(Cellular senescence);05202(Transcriptional misregulation in cancers)	K10138	NA	insulin like growth factor binding protein 1 [Source:HGNC Symbol;Acc:HGNC:5469]	Exon (ENSAPLT00000030826/ENSAPLG00000025569, exon 3 of 4)	-0.302	-0.471	-1.04	down	0.0363511	-4.78186	0.000239315	0.000560556	down	yes	0.186074	0	0	2.3016	1.77283	1.04437
chr2	59222486	59222665	180	ENSAPLG00000019588	ENSAPLT00000018252	1465		GO:0003676(nucleic acid binding)	04340(Hedgehog signaling pathway)	K06225	NA		Exon (ENSAPLT00000018252/ENSAPLG00000019588, exon 1 of 1)	-0.49	-0.827	-1.05	down	0.389564	-1.36007	0.00194195	0.00392765	down	yes	0.943319	1.09398	1.98122	3.03541	3.15596	4.12406
chr2	59732327	59732475	149	ENSAPLG00000028650	ENSAPLT00000025522	621		NA	NA	NA	NA		Exon (ENSAPLT00000025522/ENSAPLG00000028650, exon 1 of 1)	-0.78	-1.3	-1.61	down	0.564834	-0.8241	0.0270251	0.043901	down	no	1.74087	2.69829	2.20286	4.8908	2.67644	4.19199
chr2	61070492	61071865	1374	ENSAPLG00000007615	ENSAPLT00000007898	4164	KBTBD2	GO:0005515(protein binding)	NA	NA	NA	kelch repeat and BTB domain containing 2 [Source:HGNC Symbol;Acc:HGNC:21751]	Exon (ENSAPLT00000007898/ENSAPLG00000007615, exon 3 of 3)	-8.51	-10.2	0.426	up	0.532693	-0.908623	1.18167e-06	3.7186e-06	down	no	16.0355	14.134	15.4074	33.0713	26.3904	26.0978
chr2	63860515	63860993	479	ENSAPLG00000031009	ENSAPLT00000023282	3514	EDN1	GO:0000122(negative regulation of transcription by RNA polymerase II);GO:0001501(skeletal system development);GO:0001516(prostaglandin biosynthetic process);GO:0001569(branching involved in blood vessel morphogenesis);GO:0001666(response to hypoxia);GO:0001701(in utero embryonic development);GO:0003100(regulation of systemic arterial blood pressure by endothelin);GO:0005102(signaling receptor bin…	04916(Melanogenesis);04270(Vascular smooth muscle contraction);04933(AGE-RAGE signaling pathway in diabetic complications)	K16366	NA	endothelin 1 [Source:HGNC Symbol;Acc:HGNC:3176]	3' UTR	-0.523	-0.887	-0.583	down	0.0612451	-4.02926	3.53076e-13	2.12443e-12	down	yes	0.303214	0.87566	0.224371	8.34684	8.01006	6.55506
chr2	63924135	63924254	120	ENSAPLG00000012713	ENSAPLT00000013234	6153	HIVEP1	GO:0000122(negative regulation of transcription by RNA polymerase II);GO:0000980(RNA polymerase II distal enhancer sequence-specific DNA binding);GO:0001227(DNA-binding transcription repressor activity, RNA polymerase II-specific);GO:0003676(nucleic acid binding);GO:0005634(nucleus);GO:0005654(nucleoplasm);GO:0005739(mitochondrion);GO:0016604(nuclear body);GO:0016604(nuclear body)	NA	NA	NA	human immunodeficiency virus type I enhancer binding protein 1 [Source:HGNC Symbol;Acc:HGNC:4920]	Exon (ENSAPLT00000013234/ENSAPLG00000012713, exon 2 of 8)	-0.707	-1.18	1.1	up	0.429804	-1.21825	2.7662e-08	1.04849e-07	down	yes	2.61786	2.10269	3.6123	6.08872	8.01538	5.28348
chr2	64864446	64864772	327	ENSAPLG00000001019	ENSAPLT00000046341	29448	GLB1	GO:0004553(hydrolase activity, hydrolyzing O-glycosyl compounds);GO:0004565(beta-galactosidase activity);GO:0005615(extracellular space);GO:0005737(cytoplasm);GO:0005794(Golgi apparatus);GO:0005975(carbohydrate metabolic process);GO:0016787(hydrolase activity);GO:0042803(protein homodimerization activity);GO:0043231(intracellular membrane-bounded organelle);GO:0044262(cellular carbohydrate metabo…	00052(Galactose metabolism);00600(Sphingolipid metabolism);00531(Glycosaminoglycan degradation);00604(Glycosphingolipid biosynthesis - ganglio series);00511(Other glycan degradation);04142(Lysosome);04142(Lysosome)	K12309	EC:3.2.1.23	galactosidase beta 1 [Source:HGNC Symbol;Acc:HGNC:4298]	3' UTR	-1.84	-2.7	-1.51	down	2.57797	1.36623	0.000878051	0.00187389	up	yes	8.72442	6.90466	9.43286	3.20168	3.23784	3.28208
chr2	66712947	66713007	61	ENSAPLG00000011790	ENSAPLT00000037835	33336		GO:0005515(protein binding);GO:0005515(protein binding)	04144(Endocytosis);04144(Endocytosis)	K12200	NA		3' UTR	-0.591	-1	0.676	up	1.12725	0.172813	0.689326	0.748873	up	no	24.5661	20.015	31.094	24.0476	25.2608	17.8237
chr2	68456748	68456957	210	ENSAPLG00000003818	ENSAPLT00000003909	35542	DSP	GO:0001533(cornified envelope);GO:0002934(desmosome organization);GO:0003223(ventricular compact myocardium morphogenesis);GO:0005080(protein kinase C binding);GO:0005198(structural molecule activity);GO:0005515(protein binding);GO:0005856(cytoskeleton);GO:0005882(intermediate filament);GO:0005886(plasma membrane);GO:0005911(cell-cell junction);GO:0014704(intercalated disc);GO:0016323(basolateral…	NA	NA	NA	desmoplakin [Source:HGNC Symbol;Acc:HGNC:3052]	Exon (ENSAPLT00000003909/ENSAPLG00000003818, exon 24 of 24)	-0.481	-0.812	-2.16	down	584.07	9.19	4.69931e-81	4.71072e-79	up	yes	73.3337	67.1093	83.5076	0.156847	0.192494	0.03409
chr2	69328465	69328914	450	ENSAPLG00000005643	ENSAPLT00000041869	53454	FARS2	GO:0000049(tRNA binding);GO:0000166(nucleotide binding);GO:0004812(aminoacyl-tRNA ligase activity);GO:0004826(phenylalanine-tRNA ligase activity);GO:0005524(ATP binding);GO:0005737(cytoplasm);GO:0006432(phenylalanyl-tRNA aminoacylation);GO:0008033(tRNA processing);GO:0043039(tRNA aminoacylation);GO:0043039(tRNA aminoacylation)	00970(Aminoacyl-tRNA biosynthesis);00970(Aminoacyl-tRNA biosynthesis)	K01889	EC:6.1.1.20	phenylalanyl-tRNA synthetase 2, mitochondrial [Source:HGNC Symbol;Acc:HGNC:21062]	5' UTR	-4.45	-5.78	0.523	up	0.89581	-0.158735	0.11193	0.156575	down	no	10.6799	13.3367	11.8891	13.1469	12.2678	14.6672
chr2	70392582	70399171	6590	ENSAPLG00000006967	ENSAPLT00000007226	22385	MARCH11	GO:0008270(zinc ion binding)	NA	NA	NA	membrane associated ring-CH-type finger 11 [Source:HGNC Symbol;Acc:HGNC:33609]	Exon (ENSAPLT00000007226/ENSAPLG00000006967, exon 5 of 6)	-0.272	-0.392	-1.01	down	-inf	-inf	1.14913e-26	1.5591e-25	down	yes	0	0	0	9.59212	6.622	14.411
chr2	73127556	73127646	91	ENSAPLG00000014337	ENSAPLT00000014996	224346		GO:0005509(calcium ion binding);GO:0005886(plasma membrane);GO:0007155(cell adhesion);GO:0007156(homophilic cell adhesion via plasma membrane adhesion molecules);GO:0016020(membrane);GO:0098609(cell-cell adhesion)	NA	NA	NA		Exon (ENSAPLT00000014996/ENSAPLG00000014337, exon 3 of 13)	-0.528	-0.895	-4	down	-inf	-inf	1	1	down	no	0	0	0	1.84051	0	0
chr2	74400860	74401129	270	ENSAPLG00000003386	ENSAPLT00000028723	61353	PHLPP1	GO:0002667(regulation of T cell anergy);GO:0003824(catalytic activity);GO:0005515(protein binding);GO:0009649(entrainment of circadian clock);GO:0042981(regulation of apoptotic process);GO:0043408(regulation of MAPK cascade);GO:0046328(regulation of JNK cascade);GO:0051898(negative regulation of protein kinase B signaling);GO:1900744(regulation of p38MAPK cascade)	NA	NA	NA	PH domain and leucine rich repeat protein phosphatase 1 [Source:HGNC Symbol;Acc:HGNC:20610]	Exon (ENSAPLT00000028723/ENSAPLG00000003386, exon 19 of 20)	-3.57	-4.76	0.713	up	0.513855	-0.960566	1.50423e-07	5.24348e-07	down	no	11.7256	9.1838	14.7055	25.7314	23.1729	20.405
chr2	74594378	74594588	211	ENSAPLG00000003573	ENSAPLT00000003677	0	ZCCHC2	GO:0003676(nucleic acid binding);GO:0005737(cytoplasm);GO:0008270(zinc ion binding);GO:0035091(phosphatidylinositol binding);GO:0035091(phosphatidylinositol binding)	NA	NA	NA	zinc finger CCHC-type containing 2 [Source:HGNC Symbol;Acc:HGNC:22916]	Exon (ENSAPLT00000003677/ENSAPLG00000003573, exon 1 of 15)	-0.774	-1.29	-2.07	down	0.839341	-0.252672	0.0689102	0.101731	down	no	7.68175	6.45672	11.308	9.54426	13.2259	7.54699
chr2	75005126	75005363	238	ENSAPLG00000011358	ENSAPLT00000011974	35663	CDH20	GO:0005509(calcium ion binding);GO:0005886(plasma membrane);GO:0007155(cell adhesion);GO:0007156(homophilic cell adhesion via plasma membrane adhesion molecules);GO:0016020(membrane);GO:0098609(cell-cell adhesion)	NA	NA	NA	cadherin 20 [Source:HGNC Symbol;Acc:HGNC:1760]	Exon (ENSAPLT00000011974/ENSAPLG00000011358, exon 10 of 10)	-0.39	-0.649	-1.83	down	inf	inf	6.1303e-10	2.73769e-09	up	yes	0.404086	1.92401	1.55191	0	0	0
chr2	75375142	75375292	151	ENSAPLG00000029186	ENSAPLT00000022203	1901		GO:0003676(nucleic acid binding);GO:0003964(RNA-directed DNA polymerase activity);GO:0004190(aspartic-type endopeptidase activity);GO:0006278(RNA-dependent DNA biosynthetic process);GO:0006508(proteolysis);GO:0016032(viral process)	NA	NA	NA		Exon (ENSAPLT00000022203/ENSAPLG00000029186, exon 2 of 2)	-0.276	-0.403	2.32	up	1.49166	0.576914	0.66124	0.722925	up	no	0.622002	0.409208	0.488135	0.288135	0.347579	0.382849
chr2	80688498	80689598	1101	ENSAPLG00000020525	ENSAPLT00000047520	0		NA	NA	NA	NA		Exon (ENSAPLT00000047520/ENSAPLG00000020525, exon 1 of 3)	-0.319	-0.507	1	up	inf	inf	1	1	up	no	0	0	0.746965	0	0	0
chr2	82790216	82790783	568	ENSAPLG00000016329	ENSAPLT00000017039	37351	ANKRD33B	GO:0005515(protein binding)	04141(Protein processing in endoplasmic reticulum)	K10661	EC:2.3.2.27	ankyrin repeat domain 33B [Source:HGNC Symbol;Acc:HGNC:35240]	Exon (ENSAPLT00000017039/ENSAPLG00000016329, exon 4 of 4)	-0.736	-1.23	-0.639	down	1.95104	0.964244	0.319649	0.390221	up	no	1.43958	1.74536	2.00685	0.630287	0.980012	1.05073
chr2	84485280	84485594	315	ENSAPLG00000011614	ENSAPLT00000012083	0	UBE2QL1	GO:0005634(nucleus);GO:0005886(plasma membrane);GO:0061631(ubiquitin conjugating enzyme activity)	04120(Ubiquitin mediated proteolysis)	K10582	EC:2.3.2.23	ubiquitin conjugating enzyme E2 Q family like 1 [Source:HGNC Symbol;Acc:HGNC:37269]	Exon (ENSAPLT00000012083/ENSAPLG00000011614, exon 1 of 2)	-3.01	-4.11	-1.01	down	0.316475	-1.65984	0.000125739	0.000306843	down	yes	4.88957	7.61916	4.15627	19.6505	14.2359	18.7718
chr2	85853192	85853342	151	ENSAPLG00000004666	ENSAPLT00000033289	90079	COBL	GO:0000578(embryonic axis specification);GO:0001726(ruffle);GO:0001757(somite specification);GO:0001843(neural tube closure);GO:0001889(liver development);GO:0003779(actin binding);GO:0003785(actin monomer binding);GO:0005884(actin filament);GO:0005938(cell cortex);GO:0007165(signal transduction);GO:0016020(membrane);GO:0030041(actin filament polymerization);GO:0030424(axon);GO:0030425(dendrite);…	NA	NA	NA	cordon-bleu WH2 repeat protein [Source:HGNC Symbol;Acc:HGNC:22199]	Exon (ENSAPLT00000033289/ENSAPLG00000004666, exon 11 of 16)	-0.509	-0.862	-2.91	down	0.0832002	-3.58727	2.83408e-34	5.46952e-33	down	yes	1.2486	2.59021	1.86027	26.5796	23.0953	18.8234
chr2	91044802	91045107	306	ENSAPLG00000024272	ENSAPLT00000046238	0	NDUFS6	GO:0005739(mitochondrion);GO:0005747(mitochondrial respiratory chain complex I);GO:0006631(fatty acid metabolic process);GO:0006936(muscle contraction);GO:0010259(multicellular organism aging);GO:0022904(respiratory electron transport chain);GO:0035264(multicellular organism growth);GO:0061458(reproductive system development);GO:0070584(mitochondrion morphogenesis);GO:0072358(cardiovascular syste…	00190(Oxidative phosphorylation)	K03939	NA	NADH:ubiquinone oxidoreductase subunit S6 [Source:HGNC Symbol;Acc:HGNC:7713]	5' UTR	-1.11	-1.75	-0.447	down	0.347224	-1.52606	1.11135e-13	6.92082e-13	down	yes	82.9564	75.4221	75.3772	209.428	284.092	179.694
chr2	94214227	94214493	267	ENSAPLG00000018399	ENSAPLT00000036283	20325		GO:0003676(nucleic acid binding);GO:0008270(zinc ion binding);GO:0008270(zinc ion binding)	NA	NA	NA		Exon (ENSAPLT00000036283/ENSAPLG00000018399, exon 12 of 13)	-1.05	-1.68	-1.28	down	0.36716	-1.44552	0.0044685	0.00848111	down	yes	0.862995	0.87186	0.807334	1.70684	3.15889	2.05819
chr2	94250282	94250760	479	ENSAPLG00000013653	ENSAPLT00000014237	86418		GO:0006355(regulation of transcription, DNA-templated);GO:0006805(xenobiotic metabolic process);GO:0009410(response to xenobiotic stimulus);GO:0046983(protein dimerization activity)	NA	NA	NA		Exon (ENSAPLT00000014237/ENSAPLG00000013653, exon 11 of 11)	-0.268	-0.383	1.75	up	inf	inf	3.46368e-11	1.75307e-10	up	yes	0.876438	0.959353	0.910054	0	0	0
chr2	94642086	94652181	10096	ENSAPLG00000011263	ENSAPLT00000011742	10791	NR4A3	GO:0000122(negative regulation of transcription by RNA polymerase II);GO:0000978(RNA polymerase II proximal promoter sequence-specific DNA binding);GO:0001223(transcription coactivator binding);GO:0001228(DNA-binding transcription activator activity, RNA polymerase II-specific);GO:0001707(mesoderm formation);GO:0003677(DNA binding);GO:0003700(DNA-binding transcription factor activity);GO:0003707(…	NA	NA	NA	nuclear receptor subfamily 4 group A member 3 [Source:HGNC Symbol;Acc:HGNC:7982]	Exon (ENSAPLT00000011742/ENSAPLG00000011263, exon 6 of 7)	-0.38	-0.629	-0.807	down	0.57486	-0.798717	0.148441	0.199772	down	no	0.527937	1.1202	0.519814	1.79788	1.0071	0.966292
chr2	95493068	95495957	2890	ENSAPLG00000013031	ENSAPLT00000013580	2811	GMNN	GO:0006275(regulation of DNA replication);GO:0008156(negative regulation of DNA replication);GO:0045786(negative regulation of cell cycle)	NA	NA	NA	geminin, DNA replication inhibitor [Source:HGNC Symbol;Acc:HGNC:17493]	3' UTR	-4.61	-5.95	0.72	up	1.16484	0.220135	0.965943	0.975473	up	no	5.63398	5.60381	5.61273	5.25786	6.03679	3.17127
chr2	95521097	95521276	180	ENSAPLG00000013019	ENSAPLT00000032142	12457	C6orf62	NA	NA	NA	NA	chromosome 6 open reading frame 62 [Source:HGNC Symbol;Acc:HGNC:20998]	3' UTR	-5.17	-6.57	1.35	up	0.472832	-1.0806	1.75528e-09	7.51068e-09	down	yes	32.5953	30.0742	34.6383	82.8915	63.653	59.2531
chr2	102822675	102823002	328	ENSAPLG00000010437	ENSAPLT00000010880	21384	TTC39C	GO:0005515(protein binding)	NA	NA	NA	tetratricopeptide repeat domain 39C [Source:HGNC Symbol;Acc:HGNC:26595]	Exon (ENSAPLT00000010880/ENSAPLG00000010437, exon 5 of 14)	-1.17	-1.83	-1.07	down	1.24584	0.317118	0.972694	0.980217	up	no	0.815714	1.13672	1.49678	1.03707	0.708763	1.02276
chr2	103706942	103707121	180	ENSAPLG00000004077	ENSAPLT00000004229	109171	GREB1L	GO:0001656(metanephros development);GO:0001658(branching involved in ureteric bud morphogenesis);GO:0001822(kidney development);GO:0003231(cardiac ventricle development);GO:0030539(male genitalia development);GO:0060065(uterus development);GO:0060562(epithelial tube morphogenesis);GO:0061205(paramesonephric duct development);GO:0072177(mesonephric duct development)	NA	NA	NA	GREB1 like retinoic acid receptor coactivator [Source:HGNC Symbol;Acc:HGNC:31042]	Exon (ENSAPLT00000004229/ENSAPLG00000004077, exon 23 of 34)	-0.395	-0.658	-0.763	down	0.876886	-0.189539	0.123012	0.169981	down	no	3.07462	2.6491	4.58863	4.12413	4.6489	2.98716
chr2	104207167	104207287	121	ENSAPLG00000015182	ENSAPLT00000015864	15584	YES1	GO:0001784(phosphotyrosine residue binding);GO:0004672(protein kinase activity);GO:0004713(protein tyrosine kinase activity);GO:0005515(protein binding);GO:0005524(ATP binding);GO:0005794(Golgi apparatus);GO:0005829(cytosol);GO:0005886(plasma membrane);GO:0006468(protein phosphorylation);GO:0019899(enzyme binding);GO:0044325(ion channel binding)	04520(Adherens junction)	K05705	EC:2.7.10.2	YES proto-oncogene 1, Src family tyrosine kinase [Source:HGNC Symbol;Acc:HGNC:12841]	Exon (ENSAPLT00000015864/ENSAPLG00000015182, exon 2 of 12)	-1.02	-1.63	-1.31	down	1.09859	0.135657	0.711239	0.768153	up	no	5.79494	4.90612	10.128	5.22434	9.47148	4.26399
chr2	109052603	109070966	18364	ENSAPLG00000010595	ENSAPLT00000011033	96584	SPIRE1	GO:0003779(actin binding);GO:0005654(nucleoplasm);GO:0005829(cytosol);GO:0016192(vesicle-mediated transport);GO:0030036(actin cytoskeleton organization);GO:0045010(actin nucleation);GO:0051295(establishment of meiotic spindle localization);GO:0070649(formin-nucleated actin cable assembly);GO:2000781(positive regulation of double-strand break repair);GO:2000781(positive regulation of double-strand…	NA	NA	NA	spire type actin nucleation factor 1 [Source:HGNC Symbol;Acc:HGNC:30622]	Exon (ENSAPLT00000011033/ENSAPLG00000010595, exon 8 of 16)	-1.12	-1.76	-0.554	down	9.34329	3.22393	5.7979e-18	4.85116e-17	up	yes	20.4025	20.4755	25.314	1.51246	3.35713	2.21485
chr2	112505293	112505352	60	ENSAPLG00000006441	ENSAPLT00000017890	50255		GO:0003677(DNA binding)	NA	NA	NA		Exon (ENSAPLT00000017890/ENSAPLG00000006441, exon 9 of 9)	-0.277	-0.407	-1.1	down	2.18022	1.12447	0.0432059	0.067103	up	yes	1.51874	0.969825	1.87812	0.573103	0.820945	0.608817
chr2	112506670	112507059	390	ENSAPLG00000006441	ENSAPLT00000017890	48548		GO:0003677(DNA binding)	NA	NA	NA		Exon (ENSAPLT00000017890/ENSAPLG00000006441, exon 9 of 9)	-0.558	-0.947	-0.991	down	2.18022	1.12447	0.0432059	0.067103	up	yes	1.51874	0.969825	1.87812	0.573103	0.820945	0.608817
chr2	112555252	112560428	5177	ENSAPLG00000006441	ENSAPLT00000017890	0		GO:0003677(DNA binding)	NA	NA	NA		5' UTR	-0.659	-1.11	-0.929	down	2.18022	1.12447	0.0432059	0.067103	up	yes	1.51874	0.969825	1.87812	0.573103	0.820945	0.608817
chr2	116738385	116749482	11098	ENSAPLG00000004621	ENSAPLT00000004768	0	TCEA1	GO:0003676(nucleic acid binding);GO:0005634(nucleus);GO:0005669(transcription factor TFIID complex);GO:0005730(nucleolus);GO:0006351(transcription, DNA-templated);GO:0006355(regulation of transcription, DNA-templated);GO:0008270(zinc ion binding)	NA	NA	NA	transcription elongation factor A1 [Source:HGNC Symbol;Acc:HGNC:11612]	Exon (ENSAPLT00000004768/ENSAPLG00000004621, exon 1 of 10)	-1.12	-1.77	0.649	up	1.59313	0.671868	0.196254	0.255913	up	no	20.3983	18.7634	27.935	18.1315	13.3166	10.668
chr2	117406529	117406707	179	ENSAPLG00000021925	ENSAPLT00000046059	5115		NA	NA	NA	NA		Exon (ENSAPLT00000046059/ENSAPLG00000021925, exon 2 of 2)	-0.362	-0.593	1	up	2.26221	1.17773	0.230777	0.294751	up	no	1.33075	0.816589	0.627032	0.234434	0.540667	0.451298
chr2	117411466	117411585	120	ENSAPLG00000021925	ENSAPLT00000046059	237		NA	NA	NA	NA		Exon (ENSAPLT00000046059/ENSAPLG00000021925, exon 1 of 2)	-0.633	-1.07	1.66	up	2.26221	1.17773	0.230777	0.294751	up	no	1.33075	0.816589	0.627032	0.234434	0.540667	0.451298
chr2	117412197	117412464	268	ENSAPLG00000011638	ENSAPLT00000024162	24137		NA	NA	NA	NA		3' UTR	-0.717	-1.2	-1.02	down	3.08752	1.62645	0.0299733	0.0481448	up	yes	2.59796	1.90771	2.39603	0.973577	0.838216	0.423555
chr2	117642452	117642869	418	ENSAPLG00000007072	ENSAPLT00000007339	0	RPS20	GO:0003735(structural constituent of ribosome);GO:0005840(ribosome);GO:0006412(translation);GO:0015935(small ribosomal subunit);GO:0022627(cytosolic small ribosomal subunit);GO:0045202(synapse)	03010(Ribosome)	K02969	NA	ribosomal protein S20 [Source:HGNC Symbol;Acc:HGNC:10405]	Exon (ENSAPLT00000007339/ENSAPLG00000007072, exon 1 of 2)	-43.5	-46.2	0.365	up	1.59657	0.674976	0.0710939	0.104595	up	no	3638.92	3960.12	3860.61	2295.47	2301.68	2580.52
chr2	119834317	119850558	16242	ENSAPLG00000006796	ENSAPLT00000038830	12029	ASPH	GO:0004597(peptide-aspartate beta-dioxygenase activity);GO:0005515(protein binding);GO:0005737(cytoplasm);GO:0005783(endoplasmic reticulum);GO:0005886(plasma membrane);GO:0007389(pattern specification process);GO:0008285(negative regulation of cell population proliferation);GO:0016020(membrane);GO:0018193(peptidyl-amino acid modification);GO:0031647(regulation of protein stability);GO:0032541(cor…	NA	NA	NA	aspartate beta-hydroxylase [Source:HGNC Symbol;Acc:HGNC:757]	Exon (ENSAPLT00000038830/ENSAPLG00000006796, exon 4 of 27)	-18	-20.3	-1.12	down	0.304471	-1.71562	3.86191e-10	1.75968e-09	down	yes	2.28432	3.49881	4.58225	15.8477	10.331	7.86526
chr2	121580344	121580520	177	ENSAPLG00000020533	ENSAPLT00000028309	15806	CRH	GO:0005179(hormone activity);GO:0005576(extracellular region)	04730(Long-term depression);05034(Alcoholism);04934(Cushing syndrome)	K05256	NA	corticotropin releasing hormone [Source:HGNC Symbol;Acc:HGNC:2355]	Exon (ENSAPLT00000028309/ENSAPLG00000020533, exon 4 of 4)	-0.335	-0.541	-0.874	down	0.232596	-2.1041	0.0409531	0.0639796	down	yes	0.393128	0.682539	0	1.3552	2.13685	1.13256
chr2	123060232	123060680	449	ENSAPLG00000004488	ENSAPLT00000004611	777	SLCO5A1	GO:0005215(transporter activity);GO:0005515(protein binding);GO:0016020(membrane);GO:0055085(transmembrane transport)	NA	NA	NA	solute carrier organic anion transporter family member 5A1 [Source:HGNC Symbol;Acc:HGNC:19046]	Exon (ENSAPLT00000004611/ENSAPLG00000004488, exon 1 of 10)	-3.39	-4.55	-1.26	down	1.35015	0.433122	0.763661	0.812782	up	no	0.967209	0.888632	1.67693	0.873721	1.11025	0.632601
chr2	123183295	123192754	9460	ENSAPLG00000007560	ENSAPLT00000021362	37227	NCOA2	GO:0000122(negative regulation of transcription by RNA polymerase II);GO:0000978(RNA polymerase II proximal promoter sequence-specific DNA binding);GO:0001162(RNA polymerase II intronic transcription regulatory region sequence-specific DNA binding);GO:0003682(chromatin binding);GO:0003713(transcription coactivator activity);GO:0005102(signaling receptor binding);GO:0005634(nucleus);GO:0005654(nuc…	NA	NA	NA	nuclear receptor coactivator 2 [Source:HGNC Symbol;Acc:HGNC:7669]	Exon (ENSAPLT00000021362/ENSAPLG00000007560, exon 9 of 21)	-3.94	-5.19	-0.86	down	0.535303	-0.901572	4.00506e-06	1.1859e-05	down	no	3.9112	3.58007	5.04802	8.5588	8.06362	6.80223
chr2	123390469	123390588	120	ENSAPLG00000006799	ENSAPLT00000035835	12829		GO:0006616(SRP-dependent cotranslational protein targeting to membrane, translocation);GO:0016021(integral component of membrane);GO:0016021(integral component of membrane)	04141(Protein processing in endoplasmic reticulum);04141(Protein processing in endoplasmic reticulum)	K14010	NA		3' UTR	-1.75	-2.59	1.33	up	1.13897	0.18773	0.683692	0.744173	up	no	33.8661	30.5495	45.8488	26.1166	34.8245	35.8694
chr2	123390647	123394197	3551	ENSAPLG00000006799	ENSAPLT00000035835	9220		GO:0006616(SRP-dependent cotranslational protein targeting to membrane, translocation);GO:0016021(integral component of membrane);GO:0016021(integral component of membrane)	04141(Protein processing in endoplasmic reticulum);04141(Protein processing in endoplasmic reticulum)	K14010	NA		3' UTR	-8.54	-10.3	0.589	up	1.13897	0.18773	0.683692	0.744173	up	no	33.8661	30.5495	45.8488	26.1166	34.8245	35.8694
chr2	124427318	124430189	2872	ENSAPLG00000005601	ENSAPLT00000006390	3235	RPL7	GO:0003677(DNA binding);GO:0003729(mRNA binding);GO:0005844(polysome);GO:0006364(rRNA processing);GO:0014069(postsynaptic density);GO:0022625(cytosolic large ribosomal subunit);GO:0042273(ribosomal large subunit biogenesis);GO:0042803(protein homodimerization activity);GO:0045202(synapse);GO:1990904(ribonucleoprotein complex);GO:1990904(ribonucleoprotein complex)	03010(Ribosome);03010(Ribosome)	K02937	NA	ribosomal protein L7 [Source:HGNC Symbol;Acc:HGNC:10363]	3' UTR	-4.59	-5.93	0.415	up	1.06139	0.0859524	0.440772	0.512844	up	no	481.644	500.254	504.847	549.272	428.095	423.389
chr2	124726387	124728800	2414	ENSAPLG00000016969	ENSAPLT00000023864	0	ELOC	GO:0006511(ubiquitin-dependent protein catabolic process)	04120(Ubiquitin mediated proteolysis)	K03872	NA	elongin C [Source:HGNC Symbol;Acc:HGNC:11617]	Exon (ENSAPLT00000023864/ENSAPLG00000016969, exon 1 of 2)	-2.68	-3.73	0.472	up	0.64352	-0.635942	0.0201896	0.0337963	down	no	16.1235	16.5044	18.5623	25.1931	30.4221	23.9319
chr2	129629877	129634155	4279	ENSAPLG00000029298	ENSAPLT00000017194	0	C8orf59	NA	NA	NA	NA	chromosome 8 open reading frame 59 [Source:HGNC Symbol;Acc:HGNC:32235]	Exon (ENSAPLT00000017194/ENSAPLG00000029298, exon 1 of 3)	-2.98	-4.08	0.365	up	2.80193	1.48642	2.37986e-06	7.24626e-06	up	yes	188.073	162.481	154.902	61.2031	60.1305	59.0617
chr2	137396235	137399407	3173	ENSAPLG00000019949	ENSAPLT00000035936	18378	BAALC	GO:0005634(nucleus);GO:0005737(cytoplasm);GO:0005829(cytosol)	NA	NA	NA	BAALC, MAP3K1 and KLF4 binding [Source:HGNC Symbol;Acc:HGNC:14333]	Exon (ENSAPLT00000035936/ENSAPLG00000019949, exon 2 of 3)	-0.286	-0.43	2.46	up	inf	inf	1	1	up	no	0.093367	0	0.406986	0	0	0
chr2	138247773	138247893	121	ENSAPLG00000015431	ENSAPLT00000016109	20275	SPAG1	GO:0005515(protein binding);GO:0005737(cytoplasm);GO:0005829(cytosol)	NA	NA	NA	sperm associated antigen 1 [Source:HGNC Symbol;Acc:HGNC:11212]	Exon (ENSAPLT00000016109/ENSAPLG00000015431, exon 10 of 18)	-2.07	-2.99	-2.77	down	3.37396	1.75444	0.0559506	0.0847177	up	no	0.532873	0.883149	1.16819	0.171044	0.180135	0.41475
chr2	139074787	139075087	301	ENSAPLG00000000829	ENSAPLT00000000803	210	KCNS2	GO:0005216(ion channel activity);GO:0005249(voltage-gated potassium channel activity);GO:0005886(plasma membrane);GO:0006811(ion transport);GO:0006813(potassium ion transport);GO:0008076(voltage-gated potassium channel complex);GO:0016020(membrane);GO:0048471(perinuclear region of cytoplasm);GO:0051260(protein homooligomerization);GO:0055085(transmembrane transport);GO:1902259(regulation of delay…	NA	NA	NA	potassium voltage-gated channel modifier subfamily S member 2 [Source:HGNC Symbol;Acc:HGNC:6301]	Exon (ENSAPLT00000000803/ENSAPLG00000000829, exon 1 of 2)	-0.256	-0.352	1.74	up	inf	inf	1	1	up	no	0.360295	0.524721	0	0	0	0
chr2	139203322	139203887	566	ENSAPLG00000014418	ENSAPLT00000015047	21836	POP1	GO:0000171(ribonuclease MRP activity);GO:0000172(ribonuclease MRP complex);GO:0001682(tRNA 5'-leader removal);GO:0004526(ribonuclease P activity);GO:0005655(nucleolar ribonuclease P complex);GO:0005730(nucleolus);GO:0016078(tRNA catabolic process);GO:0030681(multimeric ribonuclease P complex);GO:0033204(ribonuclease P RNA binding)	03013(RNA transport);03008(Ribosome biogenesis in eukaryotes)	K01164	EC:3.1.26.5	POP1 homolog, ribonuclease P/MRP subunit [Source:HGNC Symbol;Acc:HGNC:30129]	Exon (ENSAPLT00000015047/ENSAPLG00000014418, exon 15 of 15)	-0.663	-1.12	-0.841	down	42.8108	5.4199	1.14164e-09	4.95896e-09	up	yes	3.79041	4.93546	6.37336	0	0.222023	0.130674
chr2	139204778	139205076	299	ENSAPLG00000014418	ENSAPLT00000015047	20647	POP1	GO:0000171(ribonuclease MRP activity);GO:0000172(ribonuclease MRP complex);GO:0001682(tRNA 5'-leader removal);GO:0004526(ribonuclease P activity);GO:0005655(nucleolar ribonuclease P complex);GO:0005730(nucleolus);GO:0016078(tRNA catabolic process);GO:0030681(multimeric ribonuclease P complex);GO:0033204(ribonuclease P RNA binding)	03013(RNA transport);03008(Ribosome biogenesis in eukaryotes)	K01164	EC:3.1.26.5	POP1 homolog, ribonuclease P/MRP subunit [Source:HGNC Symbol;Acc:HGNC:30129]	Exon (ENSAPLT00000015047/ENSAPLG00000014418, exon 14 of 15)	-0.399	-0.668	-1.31	down	42.8108	5.4199	1.14164e-09	4.95896e-09	up	yes	3.79041	4.93546	6.37336	0	0.222023	0.130674
chr2	139695412	139705266	9855	ENSAPLG00000013098	ENSAPLT00000044006	304	CPQ	GO:0005615(extracellular space);GO:0005737(cytoplasm);GO:0005794(Golgi apparatus);GO:0006508(proteolysis);GO:0042803(protein homodimerization activity);GO:0043171(peptide catabolic process);GO:0043231(intracellular membrane-bounded organelle);GO:0070573(metallodipeptidase activity);GO:0070573(metallodipeptidase activity)	NA	NA	NA	carboxypeptidase Q [Source:HGNC Symbol;Acc:HGNC:16910]	Exon (ENSAPLT00000044006/ENSAPLG00000013098, exon 1 of 8)	-1.48	-2.25	1.73	up	7.07668	2.82307	3.87663e-09	1.60812e-08	up	yes	4.37988	6.86979	6.73839	0.691529	0.75764	1.09271
chr2	140412082	140414168	2087	ENSAPLG00000006172	ENSAPLT00000006412	25137	DPY19L4	GO:0016021(integral component of membrane)	NA	NA	NA	dpy-19 like 4 [Source:HGNC Symbol;Acc:HGNC:27829]	3' UTR	-1.63	-2.44	-0.568	down	0.441077	-1.1809	1.6073e-07	5.57829e-07	down	yes	4.93286	4.83885	4.6201	12.1522	10.7052	9.77143
chr2	140538336	140539648	1313	ENSAPLG00000013868	ENSAPLT00000014482	14268	ESRP1	GO:0003676(nucleic acid binding);GO:0003729(mRNA binding);GO:0005634(nucleus);GO:0005654(nucleoplasm);GO:0016604(nuclear body);GO:0043484(regulation of RNA splicing)	NA	NA	NA	epithelial splicing regulatory protein 1 [Source:HGNC Symbol;Acc:HGNC:25966]	Exon (ENSAPLT00000014482/ENSAPLG00000013868, exon 10 of 14)	-0.813	-1.34	-2.7	down	306.537	8.25992	3.75068e-17	2.9881e-16	up	yes	19.9203	17.7027	19.1753	0.18529	0	0
chr2	140588540	140589855	1316	ENSAPLG00000014357	ENSAPLT00000014958	7071		GO:0005515(protein binding);GO:0008270(zinc ion binding)	04144(Endocytosis)	K11981	EC:2.3.2.27		3' UTR	-2.98	-4.08	-0.64	down	0.829772	-0.269214	0.126662	0.174324	down	no	6.32265	8.94041	11.5341	11.0263	11.5349	9.73342
chr2	143706526	143706706	181	ENSAPLG00000008065	ENSAPLT00000008378	12050	DSCC1	GO:0000775(chromosome, centromeric region);GO:0000785(chromatin);GO:0003689(DNA clamp loader activity);GO:0005654(nucleoplasm);GO:0006275(regulation of DNA replication);GO:0007064(mitotic sister chromatid cohesion);GO:0031390(Ctf18 RFC-like complex);GO:0034088(maintenance of mitotic sister chromatid cohesion);GO:0034421(post-translational protein acetylation);GO:0043142(single-stranded DNA-depend…	NA	NA	NA	DNA replication and sister chromatid cohesion 1 [Source:HGNC Symbol;Acc:HGNC:24453]	3' UTR	-0.446	-0.752	0.594	up	2.14044	1.09791	0.0247064	0.0404846	up	yes	4.22972	4.13239	6.15158	2.94714	2.29706	1.5365
chr2	143707656	143708332	677	ENSAPLG00000008065	ENSAPLT00000008378	10424	DSCC1	GO:0000775(chromosome, centromeric region);GO:0000785(chromatin);GO:0003689(DNA clamp loader activity);GO:0005654(nucleoplasm);GO:0006275(regulation of DNA replication);GO:0007064(mitotic sister chromatid cohesion);GO:0031390(Ctf18 RFC-like complex);GO:0034088(maintenance of mitotic sister chromatid cohesion);GO:0034421(post-translational protein acetylation);GO:0043142(single-stranded DNA-depend…	NA	NA	NA	DNA replication and sister chromatid cohesion 1 [Source:HGNC Symbol;Acc:HGNC:24453]	Exon (ENSAPLT00000008378/ENSAPLG00000008065, exon 7 of 9)	-1.26	-1.96	1.23	up	2.14044	1.09791	0.0247064	0.0404846	up	yes	4.22972	4.13239	6.15158	2.94714	2.29706	1.5365
chr2	143953568	143967516	13949	ENSAPLG00000019065	ENSAPLT00000038808	17562	MRPL13	GO:0003735(structural constituent of ribosome);GO:0005739(mitochondrion);GO:0005761(mitochondrial ribosome);GO:0005762(mitochondrial large ribosomal subunit);GO:0005840(ribosome);GO:0006412(translation);GO:0006412(translation)	03010(Ribosome);03010(Ribosome)	K02871	NA	mitochondrial ribosomal protein L13 [Source:HGNC Symbol;Acc:HGNC:14278]	3' UTR	-2.1	-3.02	0.895	up	1.05478	0.0769424	0.559704	0.629781	up	no	9.94749	11.9781	11.0732	11.8064	10.9592	8.51948
chr2	143970465	143979508	9044	ENSAPLG00000019065	ENSAPLT00000038808	5570	MRPL13	GO:0003735(structural constituent of ribosome);GO:0005739(mitochondrion);GO:0005761(mitochondrial ribosome);GO:0005762(mitochondrial large ribosomal subunit);GO:0005840(ribosome);GO:0006412(translation);GO:0006412(translation)	03010(Ribosome);03010(Ribosome)	K02871	NA	mitochondrial ribosomal protein L13 [Source:HGNC Symbol;Acc:HGNC:14278]	Exon (ENSAPLT00000038808/ENSAPLG00000019065, exon 3 of 7)	-1.29	-2	0.428	up	1.05478	0.0769424	0.559704	0.629781	up	no	9.94749	11.9781	11.0732	11.8064	10.9592	8.51948
chr2	144983262	144983558	297	ENSAPLG00000026389	ENSAPLT00000038839	13635	DERL1	GO:0002020(protease binding);GO:0005769(early endosome);GO:0005770(late endosome);GO:0005783(endoplasmic reticulum);GO:0005785(signal recognition particle receptor complex);GO:0006986(response to unfolded protein);GO:0016021(integral component of membrane);GO:0030176(integral component of endoplasmic reticulum membrane);GO:0030433(ubiquitin-dependent ERAD pathway);GO:0030968(endoplasmic reticulum…	04141(Protein processing in endoplasmic reticulum);04141(Protein processing in endoplasmic reticulum)	K11519	NA	derlin 1 [Source:HGNC Symbol;Acc:HGNC:28454]	3' UTR	-1.7	-2.53	-0.273	down	1.24177	0.312396	0.801727	0.845194	up	no	26.0727	25.371	24.5752	22.765	20.02	18.4332
chr2	145519613	145524346	4734	ENSAPLG00000006883	ENSAPLT00000007161	10620	TATDN1	GO:0005654(nucleoplasm);GO:0016788(hydrolase activity, acting on ester bonds);GO:0016888(endodeoxyribonuclease activity, producing 5'-phosphomonoesters)	NA	NA	NA	TatD DNase domain containing 1 [Source:HGNC Symbol;Acc:HGNC:24220]	Exon (ENSAPLT00000007161/ENSAPLG00000006883, exon 9 of 12)	-1.18	-1.86	0.491	up	1.93868	0.955077	0.0333669	0.0529939	up	no	18.3419	18.0626	26.3037	14.5381	10.0786	7.72903
chr2	145530533	145534966	4434	ENSAPLG00000006883	ENSAPLT00000007161	0	TATDN1	GO:0005654(nucleoplasm);GO:0016788(hydrolase activity, acting on ester bonds);GO:0016888(endodeoxyribonuclease activity, producing 5'-phosphomonoesters)	NA	NA	NA	TatD DNase domain containing 1 [Source:HGNC Symbol;Acc:HGNC:24220]	5' UTR	-7.86	-9.51	-0.641	down	1.93868	0.955077	0.0333669	0.0529939	up	no	18.3419	18.0626	26.3037	14.5381	10.0786	7.72903
chr2	149251580	149251995	416	ENSAPLG00000018128	ENSAPLT00000040568	22975	ST3GAL1	GO:0003836(beta-galactoside (CMP) alpha-2,3-sialyltransferase activity);GO:0006468(protein phosphorylation);GO:0006486(protein glycosylation);GO:0008373(sialyltransferase activity)	00512(Mucin type O-glycan biosynthesis);00533(Glycosaminoglycan biosynthesis - keratan sulfate);00603(Glycosphingolipid biosynthesis - globo and isoglobo series);00604(Glycosphingolipid biosynthesis - ganglio series)	K00780	EC:2.4.99.4	ST3 beta-galactoside alpha-2,3-sialyltransferase 1 [Source:HGNC Symbol;Acc:HGNC:10862]	3' UTR	-0.797	-1.32	0.508	up	0.628889	-0.669122	0.00778912	0.0141914	down	no	3.22503	3.72935	7.04792	8.63475	7.60209	6.02828
chr2	149750058	149750416	359	ENSAPLG00000014922	ENSAPLT00000046116	91727	ZFAT	GO:0001228(DNA-binding transcription activator activity, RNA polymerase II-specific);GO:0002244(hematopoietic progenitor cell differentiation);GO:0003676(nucleic acid binding);GO:0030097(hemopoiesis);GO:0060712(spongiotrophoblast layer development)	NA	NA	NA	zinc finger and AT-hook domain containing [Source:HGNC Symbol;Acc:HGNC:19899]	3' UTR	-1.04	-1.66	-1.2	down	0.738393	-0.43754	0.196038	0.255729	down	no	0.681118	0.552276	1.31034	1.50119	1.00715	0.936619
chr2	152190309	152190486	178	ENSAPLG00000000939	ENSAPLT00000000918	78757	KCNK9	GO:0005249(voltage-gated potassium channel activity);GO:0005267(potassium channel activity);GO:0006813(potassium ion transport);GO:0016020(membrane);GO:0016021(integral component of membrane);GO:0071805(potassium ion transmembrane transport)	NA	NA	NA	potassium two pore domain channel subfamily K member 9 [Source:HGNC Symbol;Acc:HGNC:6283]	Exon (ENSAPLT00000000918/ENSAPLG00000000939, exon 2 of 2)	-0.291	-0.443	-1.85	down	0.460839	-1.11766	1	1	down	no	0	0.434301	0.221932	0	1.42399	0
chr2	153261780	153272684	10905	ENSAPLG00000023130	ENSAPLT00000028781	11400	GPR20	GO:0004930(G protein-coupled receptor activity);GO:0005887(integral component of plasma membrane);GO:0007186(G protein-coupled receptor signaling pathway);GO:0016021(integral component of membrane);GO:0043235(receptor complex)	NA	NA	NA	G protein-coupled receptor 20 [Source:HGNC Symbol;Acc:HGNC:4475]	5' UTR	-1.6	-2.41	-0.568	down	2.48174	1.31135	0.0719282	0.105686	up	no	2.36926	2.62964	1.86589	0.570315	1.08881	1.10699
chr2	154263463	154310760	47298	ENSAPLG00000005699	ENSAPLT00000037372	133019	TSNARE1	GO:0016020(membrane);GO:0016192(vesicle-mediated transport)	NA	NA	NA	t-SNARE domain containing 1 [Source:HGNC Symbol;Acc:HGNC:26437]	Exon (ENSAPLT00000037372/ENSAPLG00000005699, exon 3 of 11)	-2.06	-2.98	-1.61	down	5.42411	2.43939	0.000125176	0.000305614	up	yes	4.32151	4.89586	4.44099	0.568464	0.972027	0.977593
chr2	155363260	155363349	90	ENSAPLG00000029723	ENSAPLT00000010550	6434	LYPD2	NA	NA	NA	NA	LY6/PLAUR domain containing 2 [Source:HGNC Symbol;Acc:HGNC:25215]	Exon (ENSAPLT00000010550/ENSAPLG00000029723, exon 3 of 4)	-0.33	-0.528	2.14	up	2.62077	1.38999	1	1	up	no	0.416258	0.49927	0.331213	0	0	0.475716
chr2	155448213	155450645	2433	ENSAPLG00000011149	ENSAPLT00000023225	10482	TOP1MT	GO:0003677(DNA binding);GO:0003917(DNA topoisomerase type I activity);GO:0005634(nucleus);GO:0005694(chromosome);GO:0005739(mitochondrion);GO:0006265(DNA topological change);GO:0042645(mitochondrial nucleoid)	NA	NA	NA	DNA topoisomerase I mitochondrial [Source:HGNC Symbol;Acc:HGNC:29787]	3' UTR	-4.8	-6.15	-0.817	down	12.7284	3.66998	9.62269e-22	1.01175e-20	up	yes	39.1673	32.3617	33.3541	2.64642	1.66273	3.93091
chr2	155700840	155701894	1055	ENSAPLG00000010481	ENSAPLT00000010907	5724	FAM83H	GO:0019901(protein kinase binding);GO:0030335(positive regulation of cell migration);GO:0044380(protein localization to cytoskeleton);GO:0045095(keratin filament);GO:0045104(intermediate filament cytoskeleton organization);GO:1990254(keratin filament binding)	NA	NA	NA	family with sequence similarity 83 member H [Source:HGNC Symbol;Acc:HGNC:24797]	Exon (ENSAPLT00000010907/ENSAPLG00000010481, exon 5 of 6)	-0.687	-1.15	-1.82	down	1066.06	10.0581	1.44684e-58	6.63938e-57	up	yes	13.8737	10.4287	24.3273	0	0.045616	0
chr3	4340807	4341104	298	ENSAPLG00000003229	ENSAPLT00000003285	596	LRRN4	GO:0005515(protein binding);GO:0005887(integral component of plasma membrane);GO:0007616(long-term memory);GO:0008542(visual learning)	NA	NA	NA	leucine rich repeat neuronal 4 [Source:HGNC Symbol;Acc:HGNC:16208]	Exon (ENSAPLT00000003285/ENSAPLG00000003229, exon 2 of 7)	-0.784	-1.3	-0.923	down	2.99424	1.58219	7.02403e-07	2.25297e-06	up	yes	19.4922	17.2933	19.8709	6.8329	6.59289	5.49596
chr3	4345137	4353513	8377	ENSAPLG00000003229	ENSAPLT00000003285	4926	LRRN4	GO:0005515(protein binding);GO:0005887(integral component of plasma membrane);GO:0007616(long-term memory);GO:0008542(visual learning)	NA	NA	NA	leucine rich repeat neuronal 4 [Source:HGNC Symbol;Acc:HGNC:16208]	Exon (ENSAPLT00000003285/ENSAPLG00000003229, exon 6 of 7)	-2.37	-3.35	-0.703	down	2.99424	1.58219	7.02403e-07	2.25297e-06	up	yes	19.4922	17.2933	19.8709	6.8329	6.59289	5.49596
chr3	4954527	4955242	716	ENSAPLG00000029796	ENSAPLT00000034854	54953	BCL11A	GO:0000122(negative regulation of transcription by RNA polymerase II);GO:0000978(RNA polymerase II proximal promoter sequence-specific DNA binding);GO:0001227(DNA-binding transcription repressor activity, RNA polymerase II-specific);GO:0003676(nucleic acid binding);GO:0005654(nucleoplasm)	NA	NA	NA	BCL11A, BAF complex component [Source:HGNC Symbol;Acc:HGNC:13221]	Exon (ENSAPLT00000034854/ENSAPLG00000029796, exon 3 of 3)	-0.691	-1.16	0.531	up	9.6477	3.27019	9.47748e-19	8.29983e-18	up	yes	15.8704	11.7489	15.6531	1.71472	1.72915	1.04139
chr3	5910950	5911876	927	ENSAPLG00000016346	ENSAPLT00000035527	25474	FANCL	GO:0004842(ubiquitin-protein transferase activity);GO:0005635(nuclear envelope);GO:0006281(DNA repair);GO:0006513(protein monoubiquitination);GO:0006974(cellular response to DNA damage stimulus);GO:0007276(gamete generation);GO:0016604(nuclear body);GO:0031625(ubiquitin protein ligase binding);GO:0036297(interstrand cross-link repair);GO:0042127(regulation of cell population proliferation);GO:004…	04120(Ubiquitin mediated proteolysis);03460(Fanconi anemia pathway);03460(Fanconi anemia pathway)	K10606	EC:2.3.2.27	FA complementation group L [Source:HGNC Symbol;Acc:HGNC:20748]	Exon (ENSAPLT00000035527/ENSAPLG00000016346, exon 9 of 9)	-0.306	-0.479	1.89	up	6.16402	2.62387	0.000286895	0.000663425	up	yes	4.93692	3.83637	6.64633	1.40179	0.717277	0.382487
chr3	7742603	7742840	238	ENSAPLG00000019427	ENSAPLT00000017623	768		GO:0004888(transmembrane signaling receptor activity);GO:0005509(calcium ion binding);GO:0016021(integral component of membrane)	04933(AGE-RAGE signaling pathway in diabetic complications)	K03907	NA		Exon (ENSAPLT00000017623/ENSAPLG00000019427, exon 1 of 1)	-3.72	-4.93	0.368	up	1.1744	0.231922	0.945502	0.959346	up	no	162.436	149.916	120.474	135.959	116.619	115.973
chr3	7790746	7790955	210	ENSAPLG00000024325	ENSAPLT00000031095	1792	FOXA2	GO:0000978(RNA polymerase II proximal promoter sequence-specific DNA binding);GO:0003677(DNA binding);GO:0003700(DNA-binding transcription factor activity);GO:0005634(nucleus);GO:0005654(nucleoplasm);GO:0006355(regulation of transcription, DNA-templated);GO:0006357(regulation of transcription by RNA polymerase II);GO:0008134(transcription factor binding);GO:0010719(negative regulation of epitheli…	NA	NA	NA	forkhead box A2 [Source:HGNC Symbol;Acc:HGNC:5022]	Exon (ENSAPLT00000031095/ENSAPLG00000024325, exon 3 of 3)	-0.266	-0.378	1.87	up	inf	inf	1	1	up	no	0.271627	0.242728	0.203681	0	0	0
chr3	8839966	8840176	211	ENSAPLG00000014865	ENSAPLT00000013593	145016	RIN2	GO:0007165(signal transduction);GO:0016021(integral component of membrane);GO:0055085(transmembrane transport);GO:0055085(transmembrane transport)	04014(Ras signaling pathway);04014(Ras signaling pathway)	K17638	NA	Ras and Rab interactor 2 [Source:HGNC Symbol;Acc:HGNC:18750]	Exon (ENSAPLT00000013593/ENSAPLG00000014865, exon 19 of 19)	-4.78	-6.13	-0.597	down	0.379614	-1.39739	4.16887e-13	2.49673e-12	down	yes	7.59064	7.34304	10.3142	21.8934	26.3409	18.2749
chr3	8995947	8996390	444	ENSAPLG00000029023	ENSAPLT00000043535	59	WDR92	GO:0005515(protein binding)	NA	NA	NA	WD repeat domain 92 [Source:HGNC Symbol;Acc:HGNC:25176]	5' UTR	-2.11	-3.04	-0.286	down	1.8659	0.899875	0.0113608	0.0199795	up	no	25.3572	22.7541	28.0918	15.5877	13.8365	11.4156
chr3	10673138	10673316	179	ENSAPLG00000009701	ENSAPLT00000010118	179	PELI1	GO:0000209(protein polyubiquitination);GO:0001819(positive regulation of cytokine production);GO:0004842(ubiquitin-protein transferase activity);GO:0005634(nucleus);GO:0008592(regulation of Toll signaling pathway);GO:0030890(positive regulation of B cell proliferation);GO:0031398(positive regulation of protein ubiquitination);GO:0032088(negative regulation of NF-kappaB transcription factor activi…	NA	NA	NA	pellino E3 ubiquitin protein ligase 1 [Source:HGNC Symbol;Acc:HGNC:8827]	5' UTR	-0.507	-0.859	-0.58	down	1.24242	0.313155	0.811988	0.852956	up	no	28.2433	26.4547	32.4572	30.2921	21.1198	18.7375
chr3	11599525	11599880	356	ENSAPLG00000008775	ENSAPLT00000009129	1774	THUMPD2	GO:0003723(RNA binding)	NA	NA	NA	THUMP domain containing 2 [Source:HGNC Symbol;Acc:HGNC:14890]	Exon (ENSAPLT00000009129/ENSAPLG00000008775, exon 3 of 10)	-2.39	-3.38	0.35	up	1.84321	0.882221	0.0248464	0.0406689	up	no	24.9558	26.1428	25.3684	11.7787	15.0723	14.6348
chr3	11815400	11815872	473	ENSAPLG00000012167	ENSAPLT00000013031	896		GO:0003676(nucleic acid binding);GO:0008270(zinc ion binding)	03040(Spliceosome);05168(Herpes simplex infection)	K12896	NA		5' UTR	-2.21	-3.15	-0.572	down	2.88068	1.52641	8.05091e-09	3.24065e-08	up	yes	70.0909	70.2786	72.4195	27.3558	26.6634	19.8483
chr3	11884971	11901043	16073	ENSAPLG00000013640	ENSAPLT00000014294	0	ATL2	GO:0003924(GTPase activity);GO:0005525(GTP binding);GO:0005783(endoplasmic reticulum);GO:0007029(endoplasmic reticulum organization);GO:0007030(Golgi organization);GO:0016021(integral component of membrane);GO:0042802(identical protein binding);GO:0051260(protein homooligomerization);GO:0098826(endoplasmic reticulum tubular network membrane);GO:1990809(endoplasmic reticulum tubular network membra…	NA	NA	NA	atlastin GTPase 2 [Source:HGNC Symbol;Acc:HGNC:24047]	Exon (ENSAPLT00000014294/ENSAPLG00000013640, exon 1 of 13)	-7.43	-9.05	1.08	up	0.433971	-1.20433	2.42696e-11	1.25104e-10	down	yes	39.208	34.5366	42.8924	103.447	91.8683	73.4516
chr3	13247669	13247848	180	ENSAPLG00000016172	ENSAPLT00000042753	21133	KAT14	GO:0000086(G2/M transition of mitotic cell cycle);GO:0004402(histone acetyltransferase activity);GO:0005634(nucleus);GO:0005671(Ada2/Gcn5/Ada3 transcription activator complex);GO:0016573(histone acetylation);GO:0043966(histone H3 acetylation);GO:0043966(histone H3 acetylation)	04210(Apoptosis);04210(Apoptosis)	K08731	NA	lysine acetyltransferase 14 [Source:HGNC Symbol;Acc:HGNC:15904]	3' UTR	-1.33	-2.06	-1.1	down	3.53198	1.82048	1.55709e-11	8.16921e-11	up	yes	57.0153	68.481	53.6043	19.1137	16.7113	14.8832
chr3	14387193	14387431	239	ENSAPLG00000003929	ENSAPLT00000004036	90	NRXN1	GO:0005246(calcium channel regulator activity);GO:0005730(nucleolus);GO:0005783(endoplasmic reticulum);GO:0005886(plasma membrane);GO:0007268(chemical synaptic transmission);GO:0007269(neurotransmitter secretion);GO:0007416(synapse assembly);GO:0007612(learning);GO:0009986(cell surface);GO:0016021(integral component of membrane);GO:0030534(adult behavior);GO:0031965(nuclear membrane);GO:0031982(v…	04514(Cell adhesion molecules (CAMs));04514(Cell adhesion molecules (CAMs))	K07377	NA	neurexin 1 [Source:HGNC Symbol;Acc:HGNC:8008]	Exon (ENSAPLT00000004036/ENSAPLG00000003929, exon 1 of 21)	-0.404	-0.677	-1.42	down	0.361127	-1.46942	0.00128301	0.00267619	down	yes	0.249212	0.672009	0.790731	1.75326	1.82403	1.16329
chr3	16070368	16070458	91	ENSAPLG00000014230	ENSAPLT00000044295	17831	TOGARAM2	NA	NA	NA	NA	TOG array regulator of axonemal microtubules 2 [Source:HGNC Symbol;Acc:HGNC:33715]	Exon (ENSAPLT00000044295/ENSAPLG00000014230, exon 5 of 21)	-0.558	-0.947	-2.32	down	0.65524	-0.609905	0.0937204	0.133747	down	no	0.805553	0.627834	1.07477	1.38391	1.41833	1.02562
chr3	17460785	17463446	2662	ENSAPLG00000013267	ENSAPLT00000013825	11647	ACBD3	GO:0000062(fatty-acyl-CoA binding);GO:0000139(Golgi membrane);GO:0005794(Golgi apparatus);GO:0034237(protein kinase A regulatory subunit binding)	NA	NA	NA	acyl-CoA binding domain containing 3 [Source:HGNC Symbol;Acc:HGNC:15453]	3' UTR	-7.56	-9.19	-0.46	down	1.11517	0.157264	0.653899	0.716036	up	no	17.6101	15.4561	24.2848	20.4304	16.3931	14.6045
chr3	17692088	17692177	90	ENSAPLG00000011801	ENSAPLT00000042325	297	TATDN3	GO:0016788(hydrolase activity, acting on ester bonds);GO:0016788(hydrolase activity, acting on ester bonds)	NA	NA	NA	TatD DNase domain containing 3 [Source:HGNC Symbol;Acc:HGNC:27010]	Exon (ENSAPLT00000042325/ENSAPLG00000011801, exon 1 of 9)	-0.875	-1.43	-1.16	down	1.88095	0.911465	0.0478253	0.0734379	up	no	10.3789	12.0522	11.9012	7.48166	4.94763	5.82328
chr3	17692295	17692444	150	ENSAPLG00000011801	ENSAPLT00000042325	504	TATDN3	GO:0016788(hydrolase activity, acting on ester bonds);GO:0016788(hydrolase activity, acting on ester bonds)	NA	NA	NA	TatD DNase domain containing 3 [Source:HGNC Symbol;Acc:HGNC:27010]	5' UTR	-0.646	-1.09	-1.2	down	1.88095	0.911465	0.0478253	0.0734379	up	no	10.3789	12.0522	11.9012	7.48166	4.94763	5.82328
chr3	17711015	17711434	420	ENSAPLG00000011448	ENSAPLT00000011941	60	FLVCR1	GO:0001568(blood vessel development);GO:0001701(in utero embryonic development);GO:0005739(mitochondrion);GO:0006839(mitochondrial transport);GO:0015232(heme transporter activity);GO:0015886(heme transport);GO:0016021(integral component of membrane);GO:0030218(erythrocyte differentiation);GO:0035108(limb morphogenesis);GO:0035264(multicellular organism growth);GO:0042733(embryonic digit morphogen…	NA	NA	NA	feline leukemia virus subgroup C cellular receptor 1 [Source:HGNC Symbol;Acc:HGNC:24682]	5' UTR	-1.34	-2.07	-1.22	down	1.6696	0.739501	0.327297	0.397944	up	no	4.46982	3.50424	5.25861	4.31527	0.873437	2.73695
chr3	18514367	18516973	2607	ENSAPLG00000009924	ENSAPLT00000017423	30508		GO:0008134(transcription factor binding);GO:0042803(protein homodimerization activity);GO:0070840(dynein complex binding)	NA	NA	NA		Exon (ENSAPLT00000017423/ENSAPLG00000009924, exon 16 of 20)	-0.272	-0.391	1.77	up	inf	inf	5.71608e-34	1.08291e-32	up	yes	1.41718	0.956619	1.77071	0	0	0
chr3	18518432	18521521	3090	ENSAPLG00000009924	ENSAPLT00000017423	34573		GO:0008134(transcription factor binding);GO:0042803(protein homodimerization activity);GO:0070840(dynein complex binding)	NA	NA	NA		3' UTR	-0.348	-0.565	1.96	up	inf	inf	5.71608e-34	1.08291e-32	up	yes	1.41718	0.956619	1.77071	0	0	0
chr3	20295298	20295387	90	ENSAPLG00000011679	ENSAPLT00000012174	65391	TGFB2	GO:0000902(cell morphogenesis);GO:0001540(amyloid-beta binding);GO:0001654(eye development);GO:0001666(response to hypoxia);GO:0001837(epithelial to mesenchymal transition);GO:0001942(hair follicle development);GO:0003007(heart morphogenesis);GO:0005102(signaling receptor binding);GO:0005114(type II transforming growth factor beta receptor binding);GO:0005160(transforming growth factor beta recep…	04010(MAPK signaling pathway);04350(TGF-beta signaling pathway);04068(FoxO signaling pathway);04060(Cytokine-cytokine receptor interaction);04110(Cell cycle);04218(Cellular senescence);04933(AGE-RAGE signaling pathway in diabetic complications)	K13376	NA	transforming growth factor beta 2 [Source:HGNC Symbol;Acc:HGNC:11768]	Exon (ENSAPLT00000012174/ENSAPLG00000011679, exon 3 of 7)	-0.58	-0.986	-0.776	down	0.715537	-0.482902	0.0621432	0.092761	down	no	4.03528	8.0413	10.999	11.6078	13.7353	6.90627
chr3	21073739	21075943	2205	ENSAPLG00000002096	ENSAPLT00000002092	269	C1orf115	NA	NA	NA	NA	chromosome 1 open reading frame 115 [Source:HGNC Symbol;Acc:HGNC:25873]	3' UTR	-1.57	-2.37	-0.458	down	0.772945	-0.371563	0.13467	0.183698	down	no	8.47685	7.40954	9.60444	14.8176	9.82409	8.33722
chr3	21695374	21695613	240	ENSAPLG00000006319	ENSAPLT00000048105	8693	MIA3	GO:0002042(cell migration involved in sprouting angiogenesis);GO:0002687(positive regulation of leukocyte migration);GO:0005515(protein binding);GO:0005789(endoplasmic reticulum membrane);GO:0006887(exocytosis);GO:0006888(endoplasmic reticulum to Golgi vesicle-mediated transport);GO:0007029(endoplasmic reticulum organization);GO:0007162(negative regulation of cell adhesion);GO:0015031(protein tra…	NA	NA	NA	MIA SH3 domain ER export factor 3 [Source:HGNC Symbol;Acc:HGNC:24008]	Exon (ENSAPLT00000048105/ENSAPLG00000006319, exon 4 of 26)	-1.75	-2.59	-1.18	down	0.54296	-0.881082	2.53481e-06	7.69278e-06	down	no	7.78665	7.33121	11.0745	18.2765	18.7749	11.1885
chr3	22070421	22070720	300	ENSAPLG00000009576	ENSAPLT00000010174	893	CAPN2	GO:0000785(chromatin);GO:0001824(blastocyst development);GO:0004198(calcium-dependent cysteine-type endopeptidase activity);GO:0005509(calcium ion binding);GO:0005622(intracellular);GO:0005634(nucleus);GO:0005737(cytoplasm);GO:0005764(lysosome);GO:0005783(endoplasmic reticulum);GO:0005794(Golgi apparatus);GO:0005829(cytosol);GO:0005886(plasma membrane);GO:0006508(proteolysis);GO:0007520(myoblast …	04141(Protein processing in endoplasmic reticulum);04210(Apoptosis);04217(Necroptosis);04218(Cellular senescence);04510(Focal adhesion)	K03853	EC:3.4.22.53	calpain 2 [Source:HGNC Symbol;Acc:HGNC:1479]	Exon (ENSAPLT00000010174/ENSAPLG00000009576, exon 1 of 21)	-0.688	-1.16	-1	down	0.951768	-0.0713188	0.261473	0.328392	down	no	7.00805	4.66383	6.97325	6.59216	8.03256	4.96529
chr3	22631232	22633019	1788	ENSAPLG00000015557	ENSAPLT00000046972	17054	TMEM206	NA	NA	NA	NA	transmembrane protein 206 [Source:HGNC Symbol;Acc:HGNC:25593]	3' UTR	-2.19	-3.14	-0.916	down	1.08672	0.119981	0.75891	0.80881	up	no	1.50872	2.2168	2.95227	2.69278	1.58126	1.87087
chr3	22874254	22874434	181	ENSAPLG00000010876	ENSAPLT00000011362	2141	NEK2	GO:0000070(mitotic sister chromatid segregation);GO:0000776(kinetochore);GO:0000794(condensed nuclear chromosome);GO:0000922(spindle pole);GO:0001824(blastocyst development);GO:0004672(protein kinase activity);GO:0005524(ATP binding);GO:0005654(nucleoplasm);GO:0005813(centrosome);GO:0006468(protein phosphorylation);GO:0007059(chromosome segregation);GO:0019903(protein phosphatase binding);GO:0030…	NA	NA	NA	NIMA related kinase 2 [Source:HGNC Symbol;Acc:HGNC:7745]	Exon (ENSAPLT00000011362/ENSAPLG00000010876, exon 3 of 9)	-0.377	-0.623	1.9	up	inf	inf	5.52694e-54	2.23787e-52	up	yes	13.5856	8.18631	11.3429	0	0	0
chr3	24731533	24731890	358	ENSAPLG00000008345	ENSAPLT00000008698	25629	GPR137B	NA	NA	NA	NA	G protein-coupled receptor 137B [Source:HGNC Symbol;Acc:HGNC:11862]	3' UTR	-1.53	-2.32	-1.04	down	5.70923	2.5133	6.73807e-11	3.30188e-10	up	yes	6.43928	6.9628	7.18503	1.18911	0.974676	1.44215
chr3	24930063	24931605	1543	ENSAPLG00000013330	ENSAPLT00000043445	0	SPRTN	GO:0003677(DNA binding);GO:0005634(nucleus);GO:0005654(nucleoplasm);GO:0006281(DNA repair);GO:0006974(cellular response to DNA damage stimulus);GO:0009411(response to UV);GO:0016607(nuclear speck);GO:0019985(translesion synthesis);GO:0031398(positive regulation of protein ubiquitination);GO:0043130(ubiquitin binding);GO:0070530(K63-linked polyubiquitin modification-dependent protein binding)	00230(Purine metabolism);04213(Longevity regulating pathway - multiple species)	K08049	EC:4.6.1.1	SprT-like N-terminal domain [Source:HGNC Symbol;Acc:HGNC:25356]	5' UTR	-3.91	-5.14	-0.864	down	0.628302	-0.67047	0.00142087	0.00294233	down	no	9.14002	6.39431	12.4955	15.8839	16.3153	12.4129
chr3	25146110	25221894	75785	ENSAPLG00000024768	ENSAPLT00000014027	98049	DISC1	GO:0000226(microtubule cytoskeleton organization);GO:0001764(neuron migration);GO:0002052(positive regulation of neuroblast proliferation);GO:0005739(mitochondrion);GO:0005813(centrosome);GO:0008021(synaptic vesicle);GO:0010975(regulation of neuron projection development);GO:0014069(postsynaptic density);GO:0021799(cerebral cortex radially oriented cell migration);GO:0021846(cell proliferation in…	NA	NA	NA	DISC1 scaffold protein [Source:HGNC Symbol;Acc:HGNC:2888]	Exon (ENSAPLT00000014027/ENSAPLG00000024768, exon 9 of 10)	-1.04	-1.66	-1.08	down	0.850668	-0.233332	0.173149	0.228576	down	no	1.46393	1.47381	3.50789	2.27873	2.18002	3.11841
chr3	27243199	27243547	349	ENSAPLG00000012098	ENSAPLT00000022476	137064	MTA3	GO:0003677(DNA binding);GO:0003682(chromatin binding);GO:0005634(nucleus);GO:0005737(cytoplasm);GO:0006355(regulation of transcription, DNA-templated);GO:0008270(zinc ion binding);GO:0008284(positive regulation of cell population proliferation);GO:0010971(positive regulation of G2/M transition of mitotic cell cycle);GO:0016581(NuRD complex);GO:0043231(intracellular membrane-bounded organelle);GO:…	NA	NA	NA	metastasis associated 1 family member 3 [Source:HGNC Symbol;Acc:HGNC:23784]	3' UTR	-0.28	-0.415	-1.81	down	3.66324	1.87312	2.16057e-09	9.1689e-09	up	yes	9.53051	13.1157	10.2515	3.02938	2.83988	3.11123
chr3	28736634	28736904	271	ENSAPLG00000008564	ENSAPLT00000008926	1364	SLC3A1	GO:0003824(catalytic activity);GO:0005975(carbohydrate metabolic process);GO:0031526(brush border membrane);GO:0031526(brush border membrane)	NA	NA	NA	solute carrier family 3 member 1 [Source:HGNC Symbol;Acc:HGNC:11025]	5' UTR	-1.72	-2.55	-3.64	down	0.421991	-1.24471	0.0198693	0.0333145	down	yes	0.888675	0.358972	0.596565	1.17497	1.74929	1.446
chr3	28988736	28988824	89	ENSAPLG00000008229	ENSAPLT00000037446	218866	CAMKMT	GO:0005634(nucleus);GO:0005737(cytoplasm);GO:0007005(mitochondrion organization);GO:0018022(peptidyl-lysine methylation);GO:0018025(calmodulin-lysine N-methyltransferase activity);GO:0031072(heat shock protein binding);GO:0032991(protein-containing complex);GO:0032991(protein-containing complex)	00310(Lysine degradation);00310(Lysine degradation)	K18826	EC:2.1.1.60	calmodulin-lysine N-methyltransferase [Source:HGNC Symbol;Acc:HGNC:26276]	3' UTR	-0.455	-0.767	1.2	up	2.01232	1.00886	0.423715	0.495791	up	no	1.61492	0.302822	3.26395	0.854248	1.42691	0.293829
chr3	29824690	29841617	16928	ENSAPLG00000006475	ENSAPLT00000006760	273231	PRKCE	GO:0002281(macrophage activation involved in immune response);GO:0003785(actin monomer binding);GO:0004672(protein kinase activity);GO:0004674(protein serine/threonine kinase activity);GO:0004697(protein kinase C activity);GO:0004699(calcium-independent protein kinase C activity);GO:0005524(ATP binding);GO:0005634(nucleus);GO:0005737(cytoplasm);GO:0005739(mitochondrion);GO:0005783(endoplasmic ret…	04371(Apelin signaling pathway);04530(Tight junction);04270(Vascular smooth muscle contraction);04933(AGE-RAGE signaling pathway in diabetic complications);04933(AGE-RAGE signaling pathway in diabetic complications)	K18050	EC:2.7.11.13	protein kinase C epsilon [Source:HGNC Symbol;Acc:HGNC:9401]	3' UTR	-1.12	-1.77	-2.1	down	0.501455	-0.995807	0.0218346	0.0362622	down	no	0.921056	0.753474	1.43789	2.98841	1.7227	1.49568
chr3	30102860	30106962	4103	ENSAPLG00000029053	ENSAPLT00000026217	28	CRIPT	GO:0001650(fibrillar center);GO:0005634(nucleus);GO:0005730(nucleolus);GO:0030165(PDZ domain binding);GO:0097110(scaffold protein binding)	NA	NA	NA	CXXC repeat containing interactor of PDZ3 domain [Source:HGNC Symbol;Acc:HGNC:14312]	5' UTR	-2.47	-3.47	-0.403	down	0.805827	-0.311459	0.119075	0.165271	down	no	21.8611	26.0544	19.8793	26.8227	31.1918	26.1163
chr3	31010467	31024619	14153	ENSAPLG00000013334	ENSAPLT00000013892	51661	RBKS	GO:0004747(ribokinase activity);GO:0006014(D-ribose metabolic process);GO:0016301(kinase activity);GO:0016773(phosphotransferase activity, alcohol group as acceptor);GO:0016773(phosphotransferase activity, alcohol group as acceptor)	00030(Pentose phosphate pathway);00030(Pentose phosphate pathway)	K00852	EC:2.7.1.15	ribokinase [Source:HGNC Symbol;Acc:HGNC:30325]	3' UTR	-8.47	-10.2	-0.843	down	1.52009	0.604158	0.256379	0.322779	up	no	10.7009	13.3518	10.3323	8.78637	5.36106	8.47291
chr3	31026897	31027554	658	ENSAPLG00000013328	ENSAPLT00000013873	2657		GO:0003735(structural constituent of ribosome);GO:0005622(intracellular);GO:0005840(ribosome);GO:0006412(translation)	03010(Ribosome)	K02913	NA		3' UTR	-9.53	-11.3	0.734	up	0.320507	-1.64157	1.20892e-06	3.80088e-06	down	yes	22.9549	23.0516	19.3281	66.9783	72.8701	63.9994
chr3	31187107	31187464	358	ENSAPLG00000013086	ENSAPLT00000013626	13253	SUPT7L	GO:0003713(transcription coactivator activity);GO:0004402(histone acetyltransferase activity);GO:0005634(nucleus);GO:0005654(nucleoplasm);GO:0030914(STAGA complex);GO:0043966(histone H3 acetylation);GO:0046982(protein heterodimerization activity);GO:0051457(maintenance of protein location in nucleus)	NA	NA	NA	SPT7 like, STAGA complex gamma subunit [Source:HGNC Symbol;Acc:HGNC:30632]	3' UTR	-1.3	-2.01	-0.625	down	1.47676	0.562431	0.259984	0.326799	up	no	12.3833	9.6843	13.2447	8.56356	7.95633	7.39215
chr3	31799163	31799373	211	ENSAPLG00000012986	ENSAPLT00000013515	220976	LRFN2	GO:0005515(protein binding);GO:0009986(cell surface);GO:0050804(modulation of chemical synaptic transmission);GO:0098685(Schaffer collateral - CA1 synapse);GO:0099175(regulation of postsynapse organization)	NA	NA	NA	leucine rich repeat and fibronectin type III domain containing 2 [Source:HGNC Symbol;Acc:HGNC:21226]	Exon (ENSAPLT00000013515/ENSAPLG00000012986, exon 4 of 4)	-0.761	-1.26	1.96	up	0.576086	-0.795644	0.205992	0.266792	down	no	0.279036	0.589157	0.279013	0.37032	1.144	0.477062
chr3	32611937	32612116	180	ENSAPLG00000005520	ENSAPLT00000005701	24045	KCNK17	GO:0005267(potassium channel activity);GO:0006813(potassium ion transport);GO:0016020(membrane);GO:0071805(potassium ion transmembrane transport)	NA	NA	NA	potassium two pore domain channel subfamily K member 17 [Source:HGNC Symbol;Acc:HGNC:14465]	Exon (ENSAPLT00000005701/ENSAPLG00000005520, exon 5 of 5)	-0.67	-1.13	1.92	up	3.49889	1.8069	1	1	up	no	0	0.164897	0.332355	0	0	0.142117
chr3	33629822	33629941	120	ENSAPLG00000006008	ENSAPLT00000047551	132014	MDGA1	GO:0005515(protein binding);GO:0016020(membrane);GO:0046658(anchored component of plasma membrane);GO:0098982(GABA-ergic synapse);GO:0099179(regulation of synaptic membrane adhesion);GO:1905606(regulation of presynapse assembly)	04512(ECM-receptor interaction)	K06255	NA	MAM domain containing glycosylphosphatidylinositol anchor 1 [Source:HGNC Symbol;Acc:HGNC:19267]	3' UTR	-0.276	-0.423	2.81	up	inf	inf	1.03921e-08	4.12526e-08	up	yes	0.42811	0.33263	1.09314	0	0	0
chr3	33828281	33828489	209	ENSAPLG00000015415	ENSAPLT00000016066	2255	SLC35B2	GO:0005794(Golgi apparatus);GO:0016020(membrane);GO:0046963(3'-phosphoadenosine 5'-phosphosulfate transport);GO:0046964(3'-phosphoadenosine 5'-phosphosulfate transmembrane transporter activity);GO:0055085(transmembrane transport)	NA	NA	NA	solute carrier family 35 member B2 [Source:HGNC Symbol;Acc:HGNC:16872]	Exon (ENSAPLT00000016066/ENSAPLG00000015415, exon 3 of 3)	-2.94	-4.02	0.352	up	1.7325	0.792852	0.0249466	0.0408199	up	no	61.3492	64.5877	58.4164	41.144	28.5253	36.7398
chr3	34332399	34332458	60	ENSAPLG00000016280	ENSAPLT00000016988	0	MRPS18A	GO:0003735(structural constituent of ribosome);GO:0005622(intracellular);GO:0005739(mitochondrion);GO:0005762(mitochondrial large ribosomal subunit);GO:0005763(mitochondrial small ribosomal subunit);GO:0005840(ribosome);GO:0006412(translation)	03010(Ribosome)	K02963	NA	mitochondrial ribosomal protein S18A [Source:HGNC Symbol;Acc:HGNC:14515]	Exon (ENSAPLT00000016988/ENSAPLG00000016280, exon 1 of 6)	-1.22	-1.9	-0.449	down	0.954316	-0.0674611	0.238313	0.303475	down	no	108.235	85.8843	81.0413	112.317	111.925	64.091
chr3	35433229	35433518	290	ENSAPLG00000015804	ENSAPLT00000016482	1094		NA	NA	NA	NA		Exon (ENSAPLT00000016482/ENSAPLG00000015804, exon 2 of 3)	-1.74	-2.57	-1.04	down	1.90779	0.931903	0.444793	0.516822	up	no	4.9373	1.89835	3.97388	0.510255	3.52947	1.62627
chr3	39045029	39045149	121	ENSAPLG00000010551	ENSAPLT00000011040	50900	CEP170	GO:0005515(protein binding);GO:0005813(centrosome);GO:0005814(centriole);GO:0005829(cytosol);GO:0005886(plasma membrane);GO:0120103(centriolar subdistal appendage);GO:0120103(centriolar subdistal appendage)	NA	NA	NA	centrosomal protein 170 [Source:HGNC Symbol;Acc:HGNC:28920]	Exon (ENSAPLT00000011040/ENSAPLG00000010551, exon 12 of 20)	-0.444	-0.748	1.31	up	0.617145	-0.696317	0.0271686	0.0441063	down	no	0.726301	1.02494	1.82014	2.52473	1.79595	1.46626
chr3	42729564	42729683	120	ENSAPLG00000009492	ENSAPLT00000009989	30196	THBS2	GO:0005509(calcium ion binding);GO:0005515(protein binding);GO:0005576(extracellular region);GO:0005604(basement membrane);GO:0007155(cell adhesion);GO:0016525(negative regulation of angiogenesis);GO:0031012(extracellular matrix);GO:0031091(platelet alpha granule)	04512(ECM-receptor interaction);04145(Phagosome);04510(Focal adhesion)	K04659	NA	thrombospondin 2 [Source:HGNC Symbol;Acc:HGNC:11786]	3' UTR	-1.43	-2.18	-1.01	down	1.57334	0.653832	0.38542	0.457781	up	no	3.43417	3.54394	8.47724	2.28802	5.06029	2.47496
chr3	43259202	43259442	241	ENSAPLG00000016135	ENSAPLT00000016828	11563	DACT2	GO:0002244(hematopoietic progenitor cell differentiation);GO:0003382(epithelial cell morphogenesis);GO:0005080(protein kinase C binding);GO:0007162(negative regulation of cell adhesion);GO:0008013(beta-catenin binding);GO:0008134(transcription factor binding);GO:0043588(skin development);GO:0051018(protein kinase A binding);GO:0070097(delta-catenin binding);GO:0072061(inner medullary collecting d…	NA	NA	NA	dishevelled binding antagonist of beta catenin 2 [Source:HGNC Symbol;Acc:HGNC:21231]	Exon (ENSAPLT00000016828/ENSAPLG00000016135, exon 4 of 4)	-1.58	-2.38	-0.885	down	5.10597	2.35218	8.567e-08	3.05753e-07	up	yes	22.9991	29.6306	25.4864	8.7336	2.39563	4.16974
chr3	43445186	43445815	630	ENSAPLG00000016171	ENSAPLT00000016877	29942		GO:0005856(cytoskeleton)	04390(Hippo signaling pathway);04392(Hippo signaling pathway - multiple species)	K16821	NA		3' UTR	-2.01	-2.92	-0.599	down	9.10631	3.18687	1.60604e-24	1.96241e-23	up	yes	23.6868	27.3981	28.0215	3.32599	2.20822	3.15278
chr3	46892446	46892566	121	ENSAPLG00000012386	ENSAPLT00000012923	56486	AGPAT4	GO:0005741(mitochondrial outer membrane);GO:0006644(phospholipid metabolic process);GO:0016746(transferase activity, transferring acyl groups);GO:0042171(lysophosphatidic acid acyltransferase activity)	00561(Glycerolipid metabolism);00564(Glycerophospholipid metabolism)	K13523	EC:2.3.1.51;EC:2.3.1.-	1-acylglycerol-3-phosphate O-acyltransferase 4 [Source:HGNC Symbol;Acc:HGNC:20885]	3' UTR	-0.756	-1.26	-1.23	down	0.513321	-0.962065	0.000235076	0.000551252	down	no	3.89723	5.71153	6.58915	11.7625	11.8904	7.90217
chr3	47322019	47322196	178	ENSAPLG00000005614	ENSAPLT00000005809	7661		GO:0000302(response to reactive oxygen species);GO:0000303(response to superoxide);GO:0001306(age-dependent response to oxidative stress);GO:0001836(release of cytochrome c from mitochondria);GO:0001889(liver development);GO:0003032(detection of oxygen);GO:0003069(acetylcholine-mediated vasodilation involved in regulation of systemic arterial blood pressure);GO:0004784(superoxide dismutase activi…	04068(FoxO signaling pathway);04146(Peroxisome)	K04564	EC:1.15.1.1		3' UTR	-14	-16.1	0.511	up	0.555693	-0.847639	2.3626e-06	7.19794e-06	down	no	105.748	107.488	94.3215	159.762	202.03	191.674
chr3	50397664	50397871	208	ENSAPLG00000029816	ENSAPLT00000032241	87982		GO:0005089(Rho guanyl-nucleotide exchange factor activity);GO:0035023(regulation of Rho protein signal transduction)	NA	NA	NA		Exon (ENSAPLT00000032241/ENSAPLG00000029816, exon 4 of 8)	-0.624	-1.06	-0.766	down	1.18953	0.25039	0.972717	0.980217	up	no	1.89746	1.40612	2.13641	1.18955	1.76095	1.62273
chr3	50442840	50443168	329	ENSAPLG00000010066	ENSAPLT00000010514	9104		NA	NA	NA	NA		Exon (ENSAPLT00000010514/ENSAPLG00000010066, exon 10 of 11)	-0.966	-1.56	0.79	up	1.32469	0.405651	0.547782	0.618261	up	no	10.0091	9.56379	13.159	8.55112	9.81617	6.34184
chr3	50726409	50726766	358	ENSAPLG00000011927	ENSAPLT00000012416	4785	ARMT1	GO:0008757(S-adenosylmethionine-dependent methyltransferase activity);GO:0019899(enzyme binding);GO:0032259(methylation);GO:0051998(protein carboxyl O-methyltransferase activity);GO:2001020(regulation of response to DNA damage stimulus)	NA	NA	NA	acidic residue methyltransferase 1 [Source:HGNC Symbol;Acc:HGNC:17872]	Exon (ENSAPLT00000012416/ENSAPLG00000011927, exon 5 of 5)	-10.4	-12.2	-1.85	down	1.06698	0.0935391	0.584751	0.65285	up	no	7.16611	7.72211	13.7501	10.6303	7.8245	8.38559
chr3	50931579	50931727	149	ENSAPLG00000004585	ENSAPLT00000004741	56885	NA	NA	NA	NA	NA	NA	Exon (ENSAPLT00000004741/ENSAPLG00000004585, exon 4 of 8)	-0.448	-0.755	-3.17	down	1	0	1	1	no	no	NA	NA	NA	NA	NA	NA
chr3	52372875	52377996	5122	ENSAPLG00000005802	ENSAPLT00000006037	57013	TIAM2	GO:0005085(guanyl-nucleotide exchange factor activity);GO:0005089(Rho guanyl-nucleotide exchange factor activity);GO:0005096(GTPase activator activity);GO:0005515(protein binding);GO:0005737(cytoplasm);GO:0007165(signal transduction);GO:0016020(membrane);GO:0035023(regulation of Rho protein signal transduction);GO:0035556(intracellular signal transduction);GO:0035556(intracellular signal transduc…	NA	NA	NA	T cell lymphoma invasion and metastasis 2 [Source:HGNC Symbol;Acc:HGNC:11806]	Exon (ENSAPLT00000006037/ENSAPLG00000005802, exon 4 of 28)	-1.2	-1.89	2.47	up	1.45943	0.545405	0.394611	0.466975	up	no	3.03269	2.75244	3.50065	1.60191	2.90334	1.85736
chr3	52453636	52453785	150	ENSAPLG00000005802	ENSAPLT00000046477	137774	TIAM2	GO:0005085(guanyl-nucleotide exchange factor activity);GO:0005089(Rho guanyl-nucleotide exchange factor activity);GO:0005096(GTPase activator activity);GO:0005515(protein binding);GO:0005737(cytoplasm);GO:0007165(signal transduction);GO:0016020(membrane);GO:0035023(regulation of Rho protein signal transduction);GO:0035556(intracellular signal transduction);GO:0035556(intracellular signal transduc…	NA	NA	NA	T cell lymphoma invasion and metastasis 2 [Source:HGNC Symbol;Acc:HGNC:11806]	3' UTR	-0.529	-0.897	-0.582	down	1.45943	0.545405	0.394611	0.466975	up	no	3.03269	2.75244	3.50065	1.60191	2.90334	1.85736
chr3	53948396	53948486	91	ENSAPLG00000013329	ENSAPLT00000013909	501		GO:0015643(toxic substance binding)	NA	NA	NA		3' UTR	-0.384	-0.637	-2.26	down	3.99005	1.99641	1	1	up	no	0.311132	0.094086	0	0	0	0.101557
chr3	54261149	54262397	1249	ENSAPLG00000007371	ENSAPLT00000007641	24019	PLAGL1	GO:0000977(RNA polymerase II regulatory region sequence-specific DNA binding);GO:0003676(nucleic acid binding);GO:0005515(protein binding);GO:0006357(regulation of transcription by RNA polymerase II)	NA	NA	NA	PLAG1 like zinc finger 1 [Source:HGNC Symbol;Acc:HGNC:9046]	Exon (ENSAPLT00000007641/ENSAPLG00000007371, exon 7 of 7)	-1.2	-1.88	-0.403	down	0.801773	-0.318733	0.14297	0.193417	down	no	2.51388	2.73108	3.78943	4.87198	3.20004	3.19598
chr3	54750037	54750216	180	ENSAPLG00000015149	ENSAPLT00000015799	3646	HIVEP2	GO:0003676(nucleic acid binding);GO:0005654(nucleoplasm)	NA	NA	NA	human immunodeficiency virus type I enhancer binding protein 2 [Source:HGNC Symbol;Acc:HGNC:4921]	Exon (ENSAPLT00000015799/ENSAPLG00000015149, exon 2 of 7)	-1.86	-2.72	-2.34	down	0.123388	-3.01872	1.78103e-22	1.95007e-21	down	yes	1.78387	1.30249	3.00538	24.3128	13.9216	11.1361
chr3	54762895	54763373	479	ENSAPLG00000015149	ENSAPLT00000015799	16504	HIVEP2	GO:0003676(nucleic acid binding);GO:0005654(nucleoplasm)	NA	NA	NA	human immunodeficiency virus type I enhancer binding protein 2 [Source:HGNC Symbol;Acc:HGNC:4921]	Exon (ENSAPLT00000015799/ENSAPLG00000015149, exon 6 of 7)	-1.64	-2.46	0.832	up	0.123388	-3.01872	1.78103e-22	1.95007e-21	down	yes	1.78387	1.30249	3.00538	24.3128	13.9216	11.1361
chr3	56468994	56469054	61	ENSAPLG00000003036	ENSAPLT00000022543	86959	NHSL1	NA	NA	NA	NA	NHS like 1 [Source:HGNC Symbol;Acc:HGNC:21021]	Exon (ENSAPLT00000022543/ENSAPLG00000003036, exon 5 of 7)	-0.4	-0.67	-0.715	down	8.5018	3.08777	1.67687e-26	2.26027e-25	up	yes	40.9705	46.9957	51.2547	4.65584	5.08556	6.63407
chr3	56476348	56476916	569	ENSAPLG00000003036	ENSAPLT00000022543	94313	NHSL1	NA	NA	NA	NA	NHS like 1 [Source:HGNC Symbol;Acc:HGNC:21021]	Exon (ENSAPLT00000022543/ENSAPLG00000003036, exon 7 of 7)	-15.2	-17.4	-1.06	down	8.5018	3.08777	1.67687e-26	2.26027e-25	up	yes	40.9705	46.9957	51.2547	4.65584	5.08556	6.63407
chr3	57262160	57280897	18738	ENSAPLG00000012664	ENSAPLT00000013228	0	MAP7	GO:0000226(microtubule cytoskeleton organization);GO:0005829(cytosol);GO:0015630(microtubule cytoskeleton);GO:0015630(microtubule cytoskeleton)	NA	NA	NA	microtubule associated protein 7 [Source:HGNC Symbol;Acc:HGNC:6869]	5' UTR	-1.78	-2.63	1.59	up	55.0936	5.78381	8.36085e-11	4.0643e-10	up	yes	8.6781	6.54803	13.0504	0.25358	0	0.259666
chr3	57296397	57307608	11212	ENSAPLG00000012664	ENSAPLT00000013228	34237	MAP7	GO:0000226(microtubule cytoskeleton organization);GO:0005829(cytosol);GO:0015630(microtubule cytoskeleton);GO:0015630(microtubule cytoskeleton)	NA	NA	NA	microtubule associated protein 7 [Source:HGNC Symbol;Acc:HGNC:6869]	Exon (ENSAPLT00000013228/ENSAPLG00000012664, exon 8 of 17)	-1.68	-2.51	-1.14	down	55.0936	5.78381	8.36085e-11	4.0643e-10	up	yes	8.6781	6.54803	13.0504	0.25358	0	0.259666
chr3	58424641	58425029	389	ENSAPLG00000007989	ENSAPLT00000008286	7748	SLC2A12	GO:0005215(transporter activity);GO:0016020(membrane);GO:0016021(integral component of membrane);GO:0022857(transmembrane transporter activity);GO:0055085(transmembrane transport);GO:1904659(glucose transmembrane transport)	NA	NA	NA	solute carrier family 2 member 12 [Source:HGNC Symbol;Acc:HGNC:18067]	Exon (ENSAPLT00000008286/ENSAPLG00000007989, exon 2 of 5)	-1.21	-1.89	-0.572	down	0.289646	-1.78764	8.07631e-09	3.24846e-08	down	yes	5.22863	5.16956	2.91621	16.5909	16.0055	13.3714
chr3	59146233	59157712	11480	ENSAPLG00000009110	ENSAPLT00000009515	149	MOXD1	GO:0003824(catalytic activity);GO:0004497(monooxygenase activity);GO:0005507(copper ion binding);GO:0005789(endoplasmic reticulum membrane);GO:0016715(oxidoreductase activity, acting on paired donors, with incorporation or reduction of molecular oxygen, reduced ascorbate as one donor, and incorporation of one atom of oxygen);GO:0055114(oxidation-reduction process)	00350(Tyrosine metabolism)	K00503	EC:1.14.17.1	monooxygenase DBH like 1 [Source:HGNC Symbol;Acc:HGNC:21063]	Exon (ENSAPLT00000009515/ENSAPLG00000009110, exon 1 of 12)	-1.28	-1.98	-0.62	down	14.4467	3.85267	2.13907e-43	5.84283e-42	up	yes	84.1057	73.6682	86.2816	7.39588	4.77458	4.72308
chr3	60257248	60257871	624	ENSAPLG00000003591	ENSAPLT00000046175	53924	RNF217	GO:0004842(ubiquitin-protein transferase activity);GO:0016567(protein ubiquitination)	NA	NA	NA	ring finger protein 217 [Source:HGNC Symbol;Acc:HGNC:21487]	3' UTR	-1.07	-1.69	-0.44	down	0.97792	-0.032212	0.375422	0.447344	down	no	9.77761	7.50515	5.98541	9.20423	6.82266	7.76664
chr3	62562837	62571769	8933	ENSAPLG00000011121	ENSAPLT00000035023	0	L3MBTL3	GO:0005515(protein binding);GO:0005634(nucleus);GO:0005730(nucleolus);GO:0006355(regulation of transcription, DNA-templated);GO:0008270(zinc ion binding);GO:0030099(myeloid cell differentiation);GO:0030225(macrophage differentiation);GO:0030851(granulocyte differentiation);GO:0043249(erythrocyte maturation);GO:0140110(transcription regulator activity);GO:0140110(transcription regulator activity)	NA	NA	NA	L3MBTL3, histone methyl-lysine binding protein [Source:HGNC Symbol;Acc:HGNC:23035]	5' UTR	-0.407	-0.682	1.39	up	0.162376	-2.62259	8.70588e-21	8.58531e-20	down	yes	2.23101	1.94018	2.38322	10.7111	17.4492	12.2052
chr3	62588792	62594311	5520	ENSAPLG00000011121	ENSAPLT00000011615	26163	L3MBTL3	GO:0005515(protein binding);GO:0005634(nucleus);GO:0005730(nucleolus);GO:0006355(regulation of transcription, DNA-templated);GO:0008270(zinc ion binding);GO:0030099(myeloid cell differentiation);GO:0030225(macrophage differentiation);GO:0030851(granulocyte differentiation);GO:0043249(erythrocyte maturation);GO:0140110(transcription regulator activity);GO:0140110(transcription regulator activity)	NA	NA	NA	L3MBTL3, histone methyl-lysine binding protein [Source:HGNC Symbol;Acc:HGNC:23035]	Exon (ENSAPLT00000011615/ENSAPLG00000011121, exon 4 of 21)	-1.92	-2.8	-0.737	down	0.162376	-2.62259	8.70588e-21	8.58531e-20	down	yes	2.23101	1.94018	2.38322	10.7111	17.4492	12.2052
chr3	62648165	62648462	298	ENSAPLG00000011121	ENSAPLT00000011615	85536	L3MBTL3	GO:0005515(protein binding);GO:0005634(nucleus);GO:0005730(nucleolus);GO:0006355(regulation of transcription, DNA-templated);GO:0008270(zinc ion binding);GO:0030099(myeloid cell differentiation);GO:0030225(macrophage differentiation);GO:0030851(granulocyte differentiation);GO:0043249(erythrocyte maturation);GO:0140110(transcription regulator activity);GO:0140110(transcription regulator activity)	NA	NA	NA	L3MBTL3, histone methyl-lysine binding protein [Source:HGNC Symbol;Acc:HGNC:23035]	3' UTR	-1.54	-2.33	-0.748	down	0.162376	-2.62259	8.70588e-21	8.58531e-20	down	yes	2.23101	1.94018	2.38322	10.7111	17.4492	12.2052
chr3	63861232	63861381	150	ENSAPLG00000014540	ENSAPLT00000015217	626	SERINC1	GO:0005789(endoplasmic reticulum membrane);GO:0005886(plasma membrane);GO:0006658(phosphatidylserine metabolic process);GO:0006665(sphingolipid metabolic process);GO:0016020(membrane)	NA	NA	NA	serine incorporator 1 [Source:HGNC Symbol;Acc:HGNC:13464]	5' UTR	-5.29	-6.7	-0.636	down	0.48364	-1.048	1.30747e-09	5.65309e-09	down	yes	80.5131	86.5804	88.6048	179.143	178.82	170.733
chr3	65435118	65435207	90	ENSAPLG00000015174	ENSAPLT00000038403	46798	MCM9	GO:0000724(double-strand break repair via homologous recombination);GO:0003677(DNA binding);GO:0003678(DNA helicase activity);GO:0003682(chromatin binding);GO:0005524(ATP binding);GO:0005634(nucleus);GO:0006270(DNA replication initiation);GO:0006974(cellular response to DNA damage stimulus);GO:0007276(gamete generation);GO:0007292(female gamete generation);GO:0019899(enzyme binding);GO:0032406(Mu…	NA	NA	NA	minichromosome maintenance 9 homologous recombination repair factor [Source:HGNC Symbol;Acc:HGNC:21484]	3' UTR	-0.335	-0.541	-1.81	down	2.77357	1.47174	0.000424354	0.000953527	up	yes	5.873	5.29331	5.95992	1.5089	2.42477	2.24113
chr3	65558443	65604752	46310	ENSAPLG00000002357	ENSAPLT00000002360	0	PLN	GO:0002026(regulation of the force of heart contraction);GO:0005246(calcium channel regulator activity);GO:0006816(calcium ion transport);GO:0006874(cellular calcium ion homeostasis);GO:0007219(Notch signaling pathway);GO:0008016(regulation of heart contraction);GO:0010459(negative regulation of heart rate);GO:0010880(regulation of release of sequestered calcium ion into cytosol by sarcoplasmic r…	04020(Calcium signaling pathway);04261(Adrenergic signaling in cardiomyocytes)	K05852	NA	phospholamban [Source:HGNC Symbol;Acc:HGNC:9080]	Exon (ENSAPLT00000016184/ENSAPLG00000015522, exon 3 of 13)	-1.44	-2.2	-1.04	down	0.00137379	-9.50762	7.26111e-71	4.99806e-69	down	yes	2.95177	1.81215	0.350318	907.687	1034.89	1780.15
chr3	66412246	66412305	60	ENSAPLG00000004367	ENSAPLT00000045711	6270	ZUP1	GO:0003676(nucleic acid binding);GO:0003676(nucleic acid binding)	NA	NA	NA	zinc finger containing ubiquitin peptidase 1 [Source:HGNC Symbol;Acc:HGNC:21224]	Exon (ENSAPLT00000045711/ENSAPLG00000004367, exon 8 of 8)	-0.385	-0.64	-1.46	down	2.22942	1.15667	0.00143399	0.00296684	up	yes	8.87764	7.66143	9.92801	4.01449	4.69102	3.16622
chr3	66694860	66695039	180	ENSAPLG00000010010	ENSAPLT00000033318	18555	NT5DC1	NA	00532(Glycosaminoglycan biosynthesis - chondroitin sulfate / dermatan sulfate)	K01794	EC:5.1.3.19	5'-nucleotidase domain containing 1 [Source:HGNC Symbol;Acc:HGNC:21556]	Exon (ENSAPLT00000010661/ENSAPLG00000010244, exon 2 of 2)	-0.455	-0.767	-2.32	down	3.30905	1.72642	0.0998936	0.141482	up	no	0.258466	6.61346	4.34569	2.11451	0.465714	0.809765
chr3	69794917	69795931	1015	ENSAPLG00000012630	ENSAPLT00000013154	2392	ZBTB24	GO:0002244(hematopoietic progenitor cell differentiation);GO:0003676(nucleic acid binding);GO:0005515(protein binding)	NA	NA	NA	zinc finger and BTB domain containing 24 [Source:HGNC Symbol;Acc:HGNC:21143]	Exon (ENSAPLT00000013154/ENSAPLG00000012630, exon 2 of 7)	-3.7	-4.91	-0.884	down	0.611287	-0.710077	0.00294982	0.00578368	down	no	3.71734	3.50645	4.50365	7.51373	5.41122	6.25989
chr3	70822913	70823153	241	ENSAPLG00000009545	ENSAPLT00000027617	6473	BEND3	GO:0000122(negative regulation of transcription by RNA polymerase II);GO:0000182(rDNA binding);GO:0000183(chromatin silencing at rDNA);GO:0003677(DNA binding);GO:0005654(nucleoplasm);GO:0005720(nuclear heterochromatin);GO:0005730(nucleolus);GO:0006306(DNA methylation);GO:0034773(histone H4-K20 trimethylation);GO:0036124(histone H3-K9 trimethylation);GO:0043967(histone H4 acetylation);GO:0051260(p…	NA	NA	NA	BEN domain containing 3 [Source:HGNC Symbol;Acc:HGNC:23040]	Exon (ENSAPLT00000027617/ENSAPLG00000009545, exon 3 of 3)	-1.11	-1.75	-0.667	down	2.0443	1.03161	0.108044	0.151756	up	no	12.1479	10.1006	16.6526	1.96051	9.68233	7.38622
chr3	71742456	71742814	359	ENSAPLG00000014413	ENSAPLT00000040909	26084	BVES	GO:0001921(positive regulation of receptor recycling);GO:0002027(regulation of heart rate);GO:0002244(hematopoietic progenitor cell differentiation);GO:0002931(response to ischemia);GO:0005198(structural molecule activity);GO:0005886(plasma membrane);GO:0005901(caveola);GO:0005923(bicellular tight junction);GO:0007507(heart development);GO:0007519(skeletal muscle tissue development);GO:0008360(re…	04530(Tight junction);04530(Tight junction)	K21108	NA	blood vessel epicardial substance [Source:HGNC Symbol;Acc:HGNC:1152]	3' UTR	-1.33	-2.05	0.866	up	0.0842078	-3.5699	3.00188e-46	9.19716e-45	down	yes	5.72652	6.28552	8.31225	67.7231	81.2415	92.3943
chr3	74063118	74063178	61	ENSAPLG00000012589	ENSAPLT00000013180	187491	ASCC3	GO:0003676(nucleic acid binding);GO:0005524(ATP binding);GO:0005634(nucleus);GO:0005829(cytosol);GO:0006307(DNA dealkylation involved in DNA repair);GO:0008283(cell population proliferation);GO:0032508(DNA duplex unwinding);GO:0043140(ATP-dependent 3'-5' DNA helicase activity);GO:0099053(activating signal cointegrator 1 complex)	NA	NA	NA	activating signal cointegrator 1 complex subunit 3 [Source:HGNC Symbol;Acc:HGNC:18697]	Exon (ENSAPLT00000013180/ENSAPLG00000012589, exon 23 of 41)	-0.447	-0.754	-1.1	down	0.843154	-0.246132	0.0918809	0.131486	down	no	2.55383	2.80875	3.4655	4.5995	2.76835	3.10245
chr3	74203117	74203595	479	ENSAPLG00000012534	ENSAPLT00000013053	43048	SIM1	GO:0001657(ureteric bud development);GO:0003677(DNA binding);GO:0003700(DNA-binding transcription factor activity);GO:0005515(protein binding);GO:0005634(nucleus);GO:0006355(regulation of transcription, DNA-templated);GO:0046982(protein heterodimerization activity);GO:0046983(protein dimerization activity)	NA	NA	NA	SIM bHLH transcription factor 1 [Source:HGNC Symbol;Acc:HGNC:10882]	Exon (ENSAPLT00000013053/ENSAPLG00000012534, exon 11 of 11)	-0.286	-0.431	2.09	up	inf	inf	1	1	up	no	0.220966	0.321203	0.621134	0	0	0
chr3	74702907	74704830	1924	ENSAPLG00000007229	ENSAPLT00000007555	42011	USP45	GO:0004843(thiol-dependent ubiquitin-specific protease activity);GO:0005634(nucleus);GO:0005737(cytoplasm);GO:0006281(DNA repair);GO:0006511(ubiquitin-dependent protein catabolic process);GO:0008270(zinc ion binding);GO:0016579(protein deubiquitination);GO:0036459(thiol-dependent ubiquitinyl hydrolase activity)	NA	NA	NA	ubiquitin specific peptidase 45 [Source:HGNC Symbol;Acc:HGNC:20080]	Exon (ENSAPLT00000007555/ENSAPLG00000007229, exon 14 of 19)	-8.9	-10.6	0.817	up	0.165718	-2.5932	5.62827e-31	9.19492e-30	down	yes	6.60977	5.48269	8.95589	45.7848	43.3279	37.9007
chr3	74931140	74940133	8994	ENSAPLG00000006412	ENSAPLT00000006641	1187	FBXL4	GO:0005515(protein binding);GO:0005758(mitochondrial intermembrane space);GO:0016607(nuclear speck)	NA	NA	NA	F-box and leucine rich repeat protein 4 [Source:HGNC Symbol;Acc:HGNC:13601]	Exon (ENSAPLT00000006641/ENSAPLG00000006412, exon 2 of 8)	-1.57	-2.37	-1.15	down	0.642655	-0.637884	0.0964923	0.137191	down	no	1.2333	1.07781	1.37048	2.10996	1.89886	1.71989
chr3	75952591	75956672	4082	ENSAPLG00000012476	ENSAPLT00000037395	0	E2F6	GO:0000083(regulation of transcription involved in G1/S transition of mitotic cell cycle);GO:0000122(negative regulation of transcription by RNA polymerase II);GO:0000977(RNA polymerase II regulatory region sequence-specific DNA binding);GO:0001227(DNA-binding transcription repressor activity, RNA polymerase II-specific);GO:0003677(DNA binding);GO:0003700(DNA-binding transcription factor activity…	NA	NA	NA	E2F transcription factor 6 [Source:HGNC Symbol;Acc:HGNC:3120]	Exon (ENSAPLT00000037395/ENSAPLG00000012476, exon 1 of 4)	-0.743	-1.24	-1.22	down	0.376657	-1.40868	0.00197473	0.00399082	down	yes	1.78339	2.77925	3.34924	6.66524	9.78893	4.55136
chr3	76411999	76412526	528	ENSAPLG00000009885	ENSAPLT00000010373	36445	NOL10	GO:0005515(protein binding);GO:0005634(nucleus);GO:0005730(nucleolus);GO:0005730(nucleolus)	NA	NA	NA	nucleolar protein 10 [Source:HGNC Symbol;Acc:HGNC:25862]	Exon (ENSAPLT00000010373/ENSAPLG00000009885, exon 16 of 20)	-0.424	-0.713	-0.51	down	1.32436	0.405299	0.676937	0.7386	up	no	4.19198	3.54681	5.7648	4.6896	3.09465	2.41204
chr3	76776323	76776408	86	ENSAPLG00000009146	ENSAPLT00000009521	10158	KLF11	GO:0000083(regulation of transcription involved in G1/S transition of mitotic cell cycle);GO:0000122(negative regulation of transcription by RNA polymerase II);GO:0000981(DNA-binding transcription factor activity, RNA polymerase II-specific);GO:0003676(nucleic acid binding);GO:0003700(DNA-binding transcription factor activity);GO:0005654(nucleoplasm);GO:0005829(cytosol);GO:0005925(focal adhesion)…	NA	NA	NA	Kruppel like factor 11 [Source:HGNC Symbol;Acc:HGNC:11811]	Exon (ENSAPLT00000045045/ENSAPLG00000030281, exon 2 of 2)	-1.29	-2	-0.935	down	0.906167	-0.142151	0.0798997	0.116029	down	no	53.1526	48.5758	55.7424	47.9289	56.5427	69.3053
chr3	79837980	79838099	120	ENSAPLG00000016100	ENSAPLT00000045778	75076	EIPR1	GO:0005515(protein binding)	04150(mTOR signaling pathway)	K20409	NA	EARP complex and GARP complex interacting protein 1 [Source:HGNC Symbol;Acc:HGNC:12383]	3' UTR	-0.482	-0.815	-2.54	down	1.59936	0.677495	0.300337	0.370046	up	no	2.65049	1.93947	3.39374	2.30662	1.6148	1.07039
chr3	80555559	80555948	390	ENSAPLG00000015757	ENSAPLT00000016459	19398	PXDN	GO:0004601(peroxidase activity);GO:0005201(extracellular matrix structural constituent);GO:0005515(protein binding);GO:0005615(extracellular space);GO:0005783(endoplasmic reticulum);GO:0006979(response to oxidative stress);GO:0020037(heme binding);GO:0030198(extracellular matrix organization);GO:0042744(hydrogen peroxide catabolic process);GO:0055114(oxidation-reduction process);GO:0062023(collag…	NA	NA	NA	peroxidasin [Source:HGNC Symbol;Acc:HGNC:14966]	Exon (ENSAPLT00000016459/ENSAPLG00000015757, exon 11 of 17)	-3.74	-4.95	-1.31	down	0.645421	-0.631688	0.0316078	0.0504787	down	no	1.46763	2.24772	3.13626	5.14304	3.69806	1.77462
chr3	81485841	81488614	2774	ENSAPLG00000028136	ENSAPLT00000034300	0		NA	NA	NA	NA		Exon (ENSAPLT00000036145/ENSAPLG00000028136, exon 1 of 4)	-1.09	-1.73	-0.977	down	3.78996	1.92218	0.132863	0.181697	up	no	8.98299	8.28673	6.09106	0	3.94975	2.21411
chr3	81675401	81678126	2726	ENSAPLG00000030960	ENSAPLT00000022612	1046		GO:0030298(receptor signaling protein tyrosine kinase activator activity);GO:0030971(receptor tyrosine kinase binding)	NA	NA	NA		Exon (ENSAPLT00000022612/ENSAPLG00000030960, exon 1 of 4)	-0.468	-0.79	-2.6	down	0.0522062	-4.25963	0.00131692	0.00274026	down	yes	0	0.132058	0	0.589083	1.25651	0.68395
chr3	82818201	82822292	4092	ENSAPLG00000021780	ENSAPLT00000030767	10256		NA	NA	NA	NA		Exon (ENSAPLT00000030767/ENSAPLG00000021780, exon 2 of 2)	-1.23	-1.93	-1.32	down	11.9095	3.57404	0.000907073	0.00193024	up	yes	1.80956	2.20313	1.97959	0.22346	0.279693	0
chr3	87314688	87314808	121	ENSAPLG00000003666	ENSAPLT00000003784	14492	ZNF451	GO:0003676(nucleic acid binding);GO:0003714(transcription corepressor activity);GO:0005634(nucleus);GO:0016925(protein sumoylation);GO:0030512(negative regulation of transforming growth factor beta receptor signaling pathway);GO:0060633(negative regulation of transcription initiation from RNA polymerase II promoter);GO:0061665(SUMO ligase activity);GO:2000616(negative regulation of histone H3-K9 …	NA	NA	NA	zinc finger protein 451 [Source:HGNC Symbol;Acc:HGNC:21091]	Exon (ENSAPLT00000003784/ENSAPLG00000003666, exon 8 of 12)	-0.755	-1.26	0.928	up	0.761347	-0.393373	0.029381	0.0472435	down	no	5.56429	4.01312	5.18351	6.36258	6.75908	6.26622
chr3	87315048	87315257	210	ENSAPLG00000003666	ENSAPLT00000003784	14852	ZNF451	GO:0003676(nucleic acid binding);GO:0003714(transcription corepressor activity);GO:0005634(nucleus);GO:0016925(protein sumoylation);GO:0030512(negative regulation of transforming growth factor beta receptor signaling pathway);GO:0060633(negative regulation of transcription initiation from RNA polymerase II promoter);GO:0061665(SUMO ligase activity);GO:2000616(negative regulation of histone H3-K9 …	NA	NA	NA	zinc finger protein 451 [Source:HGNC Symbol;Acc:HGNC:21091]	Exon (ENSAPLT00000003784/ENSAPLG00000003666, exon 8 of 12)	-1.45	-2.22	-0.993	down	0.761347	-0.393373	0.029381	0.0472435	down	no	5.56429	4.01312	5.18351	6.36258	6.75908	6.26622
chr3	88714738	88714888	151	ENSAPLG00000006219	ENSAPLT00000025702	12260	PHF3	GO:0006351(transcription, DNA-templated);GO:0006351(transcription, DNA-templated)	NA	NA	NA	PHD finger protein 3 [Source:HGNC Symbol;Acc:HGNC:8921]	Exon (ENSAPLT00000025702/ENSAPLG00000006219, exon 3 of 15)	-0.683	-1.15	-1.39	down	0.940762	-0.0880978	0.572182	0.641452	down	no	1.82149	2.53675	1.25065	0.697835	3.98049	1.28375
chr3	88728871	88732535	3665	ENSAPLG00000006219	ENSAPLT00000025702	26393	PHF3	GO:0006351(transcription, DNA-templated);GO:0006351(transcription, DNA-templated)	NA	NA	NA	PHD finger protein 3 [Source:HGNC Symbol;Acc:HGNC:8921]	Exon (ENSAPLT00000025702/ENSAPLG00000006219, exon 7 of 15)	-1.2	-1.88	-1.71	down	0.940762	-0.0880978	0.572182	0.641452	down	no	1.82149	2.53675	1.25065	0.697835	3.98049	1.28375
chr3	91968897	91968987	91	ENSAPLG00000012238	ENSAPLT00000044443	61969	FAM135A	NA	NA	NA	NA	family with sequence similarity 135 member A [Source:HGNC Symbol;Acc:HGNC:21084]	3' UTR	-0.409	-0.687	-2.17	down	0.280931	-1.83171	1.4671e-09	6.31687e-09	down	yes	1.30466	1.21491	2.205	7.86322	5.60347	3.35086
chr3	97135502	97135742	241	ENSAPLG00000007126	ENSAPLT00000024497	31395	DOP1A	GO:0006895(Golgi to endosome transport);GO:0006895(Golgi to endosome transport)	04144(Endocytosis);04144(Endocytosis)	K19476	NA	DOP1 leucine zipper like protein A [Source:HGNC Symbol;Acc:HGNC:21194]	Exon (ENSAPLT00000024497/ENSAPLG00000007126, exon 18 of 36)	-0.451	-0.761	0.513	up	0.35314	-1.50169	9.05423e-11	4.39309e-10	down	yes	1.67489	1.7402	2.55022	5.8131	5.65591	5.4232
chr3	99771868	99771957	90	ENSAPLG00000002243	ENSAPLT00000002293	12977	CASP8AP2	GO:0003677(DNA binding);GO:0097190(apoptotic signaling pathway)	NA	NA	NA	caspase 8 associated protein 2 [Source:HGNC Symbol;Acc:HGNC:1510]	Exon (ENSAPLT00000002293/ENSAPLG00000002243, exon 6 of 8)	-0.486	-0.82	-2.46	down	0.517431	-0.950562	0.000297109	0.000685508	down	no	0.983038	1.06206	1.43985	2.37527	1.96509	2.39472
chr3	99773365	99773814	450	ENSAPLG00000002243	ENSAPLT00000002293	14474	CASP8AP2	GO:0003677(DNA binding);GO:0097190(apoptotic signaling pathway)	NA	NA	NA	caspase 8 associated protein 2 [Source:HGNC Symbol;Acc:HGNC:1510]	Exon (ENSAPLT00000002293/ENSAPLG00000002243, exon 6 of 8)	-2.07	-2.99	-0.761	down	0.517431	-0.950562	0.000297109	0.000685508	down	no	0.983038	1.06206	1.43985	2.37527	1.96509	2.39472
chr3	104239710	104240505	796	ENSAPLG00000011566	ENSAPLT00000012030	59	FAM84A	NA	NA	NA	NA	family with sequence similarity 84 member A [Source:HGNC Symbol;Acc:HGNC:20743]	Exon (ENSAPLT00000012030/ENSAPLG00000011566, exon 1 of 1)	-0.329	-0.528	0.887	up	87.3135	6.44813	1.78951e-18	1.54229e-17	up	yes	16.7464	22.0818	16.5649	0.413475	0.220941	0
chr3	104995656	104996311	656	ENSAPLG00000009825	ENSAPLT00000010242	0	MYCN	GO:0000978(RNA polymerase II proximal promoter sequence-specific DNA binding);GO:0001228(DNA-binding transcription activator activity, RNA polymerase II-specific);GO:0003700(DNA-binding transcription factor activity);GO:0005634(nucleus);GO:0005730(nucleolus);GO:0006355(regulation of transcription, DNA-templated);GO:0010628(positive regulation of gene expression);GO:0010629(negative regulation of …	NA	NA	NA	MYCN proto-oncogene, bHLH transcription factor [Source:HGNC Symbol;Acc:HGNC:7559]	5' UTR	-0.362	-0.594	1.35	up	7.69966	2.94479	1.20993e-21	1.2606e-20	up	yes	15.7415	18.1093	18.1636	2.51279	2.2528	1.98983
chr3	105927433	105977366	49934	ENSAPLG00000010558	ENSAPLT00000010986	0	VSNL1	GO:0005509(calcium ion binding);GO:0005829(cytosol);GO:0016020(membrane);GO:0035774(positive regulation of insulin secretion involved in cellular response to glucose stimulus);GO:0045921(positive regulation of exocytosis);GO:0046676(negative regulation of insulin secretion)	NA	NA	NA	visinin like 1 [Source:HGNC Symbol;Acc:HGNC:12722]	5' UTR	-1.73	-2.56	-0.742	down	38.187	5.25501	1.6493e-28	2.43271e-27	up	yes	42.9644	38.2469	46.5197	0.530394	1.5792	1.23529
chr3	106029822	106029911	90	ENSAPLG00000008596	ENSAPLT00000008949	13853	GEN1	GO:0000287(magnesium ion binding);GO:0000400(four-way junction DNA binding);GO:0000724(double-strand break repair via homologous recombination);GO:0003677(DNA binding);GO:0003824(catalytic activity);GO:0004518(nuclease activity);GO:0005813(centrosome);GO:0006281(DNA repair);GO:0008821(crossover junction endodeoxyribonuclease activity);GO:0010824(regulation of centrosome duplication);GO:0017108(5'…	NA	NA	NA	GEN1, Holliday junction 5' flap endonuclease [Source:HGNC Symbol;Acc:HGNC:26881]	Exon (ENSAPLT00000008949/ENSAPLG00000008596, exon 14 of 14)	-0.801	-1.32	1.74	up	1.02398	0.0341895	0.692336	0.751669	up	no	0.667022	0.710215	1.77984	1.46907	1.01076	0.603313
chr3	110075000	110083051	8052	ENSAPLG00000014546	ENSAPLT00000028660	200316		GO:0030246(carbohydrate binding);GO:0030246(carbohydrate binding)	04145(Phagosome);04145(Phagosome)	K06560	NA		3' UTR	-3.73	-4.94	-0.579	down	2.67208	1.41796	7.7689e-05	0.000195596	up	yes	15.1227	13.8773	13.2367	5.54611	5.15914	5.10144
chr3	113758721	113760466	1746	ENSAPLG00000011195	ENSAPLT00000044851	1162	CTSB	GO:0004197(cysteine-type endopeptidase activity);GO:0006508(proteolysis);GO:0008234(cysteine-type peptidase activity);GO:0050790(regulation of catalytic activity);GO:0050790(regulation of catalytic activity)	04142(Lysosome);04140(Autophagy - animal);04210(Apoptosis);04621(NOD-like receptor signaling pathway);04621(NOD-like receptor signaling pathway)	K01363	EC:3.4.22.1	cathepsin B [Source:HGNC Symbol;Acc:HGNC:2527]	Exon (ENSAPLT00000044851/ENSAPLG00000011195, exon 1 of 10)	-7.81	-9.46	-0.329	down	0.851132	-0.232545	0.0514895	0.078504	down	no	129.257	157.922	140.979	123.8	186.887	192.36
chr3	113925298	113933843	8546	ENSAPLG00000014949	ENSAPLT00000015574	116	FAM167A	NA	NA	NA	NA	family with sequence similarity 167 member A [Source:HGNC Symbol;Acc:HGNC:15549]	5' UTR	-0.306	-0.479	0.639	up	inf	inf	8.2338e-24	9.6061e-23	up	yes	11.5782	10.348	8.41119	0	0	0
chr3	114206485	114206724	240	ENSAPLG00000011357	ENSAPLT00000011811	123608	XKR6	GO:0016021(integral component of membrane);GO:0016021(integral component of membrane)	NA	NA	NA	XK related 6 [Source:HGNC Symbol;Acc:HGNC:27806]	Exon (ENSAPLT00000011811/ENSAPLG00000011357, exon 3 of 3)	-0.65	-1.1	1.96	up	0.769074	-0.378805	0.329977	0.400825	down	no	1.44062	0.832552	1.29655	2.079	1.91366	0.648929
chr3	114322351	114368927	46577	ENSAPLG00000017902	ENSAPLT00000023735	0		GO:0035556(intracellular signal transduction)	NA	NA	NA		5' UTR	-2.3	-3.27	0.166	up	0.235492	-2.08625	0.00140531	0.0029107	down	yes	0.109598	0.0497216	0.0927159	0.586216	0.185191	0.298845
chr3	115326519	115326608	90	ENSAPLG00000014547	ENSAPLT00000031559	31850	FBXO16	GO:0005515(protein binding)	NA	NA	NA	F-box protein 16 [Source:HGNC Symbol;Acc:HGNC:13618]	3' UTR	-0.253	-0.342	2	up	inf	inf	2.05438e-11	1.06698e-10	up	yes	0.609536	0.844219	0.560178	0	0	0
chr3	115659725	115661024	1300	ENSAPLG00000013028	ENSAPLT00000013606	12128	ADCY3	GO:0004016(adenylate cyclase activity);GO:0005886(plasma membrane);GO:0005929(cilium);GO:0006171(cAMP biosynthetic process);GO:0007189(adenylate cyclase-activating G protein-coupled receptor signaling pathway);GO:0007338(single fertilization);GO:0007340(acrosome reaction);GO:0007608(sensory perception of smell);GO:0008355(olfactory learning);GO:0009190(cyclic nucleotide biosynthetic process);GO:0…	00230(Purine metabolism);04371(Apelin signaling pathway);04020(Calcium signaling pathway);04114(Oocyte meiosis);04540(Gap junction);04912(GnRH signaling pathway);04914(Progesterone-mediated oocyte maturation);04916(Melanogenesis);04261(Adrenergic signaling in cardiomyocytes);04270(Vascular smooth muscle contraction);04270(Vascular smooth muscle contraction)	K08043	EC:4.6.1.1	adenylate cyclase 3 [Source:HGNC Symbol;Acc:HGNC:234]	3' UTR	-0.73	-1.22	1.16	up	0.431465	-1.21269	7.07218e-06	2.03116e-05	down	yes	5.99028	4.02226	4.37739	7.16935	15.4341	10.7479
chr3	115724216	115724598	383	ENSAPLG00000012374	ENSAPLT00000012877	4319		GO:0031110(regulation of microtubule polymerization or depolymerization)	NA	NA	NA		Exon (ENSAPLT00000012877/ENSAPLG00000012374, exon 2 of 2)	-1.8	-2.66	-0.877	down	inf	inf	4.89665e-21	4.91809e-20	up	yes	12.5402	15.3557	18.1017	0	0	0
chr3	116150117	116150926	810	ENSAPLG00000005877	ENSAPLT00000019597	93325	ASXL2	GO:0003677(DNA binding);GO:0006351(transcription, DNA-templated);GO:0006355(regulation of transcription, DNA-templated);GO:0006355(regulation of transcription, DNA-templated)	NA	NA	NA	ASXL transcriptional regulator 2 [Source:HGNC Symbol;Acc:HGNC:23805]	Exon (ENSAPLT00000019597/ENSAPLG00000005877, exon 12 of 12)	-5.62	-7.07	0.396	up	0.888386	-0.170742	0.0409695	0.0639954	down	no	18.635	16.162	19.6987	20.664	21.9181	18.7603
chr3	116150986	116151076	91	ENSAPLG00000005877	ENSAPLT00000019597	94194	ASXL2	GO:0003677(DNA binding);GO:0006351(transcription, DNA-templated);GO:0006355(regulation of transcription, DNA-templated);GO:0006355(regulation of transcription, DNA-templated)	NA	NA	NA	ASXL transcriptional regulator 2 [Source:HGNC Symbol;Acc:HGNC:23805]	Exon (ENSAPLT00000019597/ENSAPLG00000005877, exon 12 of 12)	-2.87	-3.95	1.14	up	0.888386	-0.170742	0.0409695	0.0639954	down	no	18.635	16.162	19.6987	20.664	21.9181	18.7603
chr3	209065	209305	241	ENSAPLG00000009014	ENSAPLT00000009380	1840	MKKS	GO:0001103(RNA polymerase II repressing transcription factor binding);GO:0005524(ATP binding);GO:0005634(nucleus);GO:0005737(cytoplasm);GO:0005813(centrosome);GO:0006457(protein folding);GO:0007286(spermatid development);GO:0007608(sensory perception of smell);GO:0010629(negative regulation of gene expression);GO:0014824(artery smooth muscle contraction);GO:0021756(striatum development);GO:002176…	NA	NA	NA	McKusick-Kaufman syndrome [Source:HGNC Symbol;Acc:HGNC:7108]	Exon (ENSAPLT00000009380/ENSAPLG00000009014, exon 2 of 5)	-0.44	-0.74	-0.61	down	0.782173	-0.35444	0.148528	0.199837	down	no	2.7412	1.59774	3.16108	3.95328	3.38396	2.25146
chr3	331237	331635	399	ENSAPLG00000009296	ENSAPLT00000009806	30	JAG1	GO:0001953(negative regulation of cell-matrix adhesion);GO:0001974(blood vessel remodeling);GO:0002011(morphogenesis of an epithelial sheet);GO:0002456(T cell mediated immunity);GO:0003184(pulmonary valve morphogenesis);GO:0003215(cardiac right ventricle morphogenesis);GO:0005112(Notch binding);GO:0005509(calcium ion binding);GO:0005515(protein binding);GO:0005543(phospholipid binding);GO:0005886…	04330(Notch signaling pathway);04371(Apelin signaling pathway)	K06052	NA	jagged 1 [Source:HGNC Symbol;Acc:HGNC:6188]	Exon (ENSAPLT00000009806/ENSAPLG00000009296, exon 1 of 26)	-1.65	-2.47	-1.04	down	1.82765	0.869988	0.0428695	0.0666407	up	no	18.6598	15.1519	30.3967	11.9523	15.9208	7.25861
chr3	2254167	2254407	241	ENSAPLG00000012639	ENSAPLT00000013213	139620	KIF16B	GO:0001704(formation of primary germ layer);GO:0001919(regulation of receptor recycling);GO:0003777(microtubule motor activity);GO:0005515(protein binding);GO:0005524(ATP binding);GO:0005547(phosphatidylinositol-3,4,5-trisphosphate binding);GO:0005768(endosome);GO:0005769(early endosome);GO:0006895(Golgi to endosome transport);GO:0007018(microtubule-based movement);GO:0007173(epidermal growth fac…	NA	NA	NA	kinesin family member 16B [Source:HGNC Symbol;Acc:HGNC:15869]	3' UTR	-1.36	-2.08	-1.03	down	0.34565	-1.53262	0.000152313	0.000366666	down	yes	0.537526	0.434591	1.39327	3.59727	1.69135	1.55468
chr3	2755531	2756068	538	ENSAPLG00000014957	ENSAPLT00000015588	4817		GO:0004930(G protein-coupled receptor activity);GO:0004983(neuropeptide Y receptor activity);GO:0007186(G protein-coupled receptor signaling pathway);GO:0016021(integral component of membrane)	NA	NA	NA		Exon (ENSAPLT00000015588/ENSAPLG00000014957, exon 2 of 2)	-0.665	-1.12	1.69	up	0.0298542	-5.06592	4.55896e-10	2.05731e-09	down	yes	0.365276	0.488608	0	12.8082	7.73127	8.06233
chr3	4719374	4720265	892	ENSAPLG00000006240	ENSAPLT00000006470	2950	PEX13	GO:0001561(fatty acid alpha-oxidation);GO:0001764(neuron migration);GO:0001967(suckling behavior);GO:0005515(protein binding);GO:0005777(peroxisome);GO:0005778(peroxisomal membrane);GO:0005779(integral component of peroxisomal membrane);GO:0007626(locomotory behavior);GO:0016021(integral component of membrane);GO:0016560(protein import into peroxisome matrix, docking);GO:0021795(cerebral cortex c…	04146(Peroxisome)	K13344	NA	peroxisomal biogenesis factor 13 [Source:HGNC Symbol;Acc:HGNC:8855]	Exon (ENSAPLT00000006470/ENSAPLG00000006240, exon 3 of 4)	-1.58	-2.38	0.669	up	0.428669	-1.22206	6.21909e-05	0.000158744	down	yes	4.87291	3.52361	7.61528	13.3246	13.5529	10.4748
chr3	4720817	4721115	299	ENSAPLG00000006240	ENSAPLT00000006470	2100	PEX13	GO:0001561(fatty acid alpha-oxidation);GO:0001764(neuron migration);GO:0001967(suckling behavior);GO:0005515(protein binding);GO:0005777(peroxisome);GO:0005778(peroxisomal membrane);GO:0005779(integral component of peroxisomal membrane);GO:0007626(locomotory behavior);GO:0016021(integral component of membrane);GO:0016560(protein import into peroxisome matrix, docking);GO:0021795(cerebral cortex c…	04146(Peroxisome)	K13344	NA	peroxisomal biogenesis factor 13 [Source:HGNC Symbol;Acc:HGNC:8855]	Exon (ENSAPLT00000006470/ENSAPLG00000006240, exon 2 of 4)	-1.96	-2.85	-0.899	down	0.428669	-1.22206	6.21909e-05	0.000158744	down	yes	4.87291	3.52361	7.61528	13.3246	13.5529	10.4748
chr3	7394340	7395633	1294	ENSAPLG00000009932	ENSAPLT00000010367	9763	ERLEC1	GO:0005788(endoplasmic reticulum lumen);GO:0051082(unfolded protein binding);GO:1904153(negative regulation of retrograde protein transport, ER to cytosol)	04141(Protein processing in endoplasmic reticulum)	K14008	NA	endoplasmic reticulum lectin 1 [Source:HGNC Symbol;Acc:HGNC:25222]	Exon (ENSAPLT00000010367/ENSAPLG00000009932, exon 8 of 13)	-1.96	-2.86	-0.69	down	1.74035	0.799375	0.0317165	0.0506219	up	no	29.4499	27.2575	34.4715	18.3307	18.1881	15.8724
chr3	7678892	7679042	151	ENSAPLG00000027566	ENSAPLT00000033890	18257	GZF1	GO:0003676(nucleic acid binding);GO:0005515(protein binding);GO:0005515(protein binding)	NA	NA	NA	GDNF inducible zinc finger protein 1 [Source:HGNC Symbol;Acc:HGNC:15808]	Exon (ENSAPLT00000033890/ENSAPLG00000027566, exon 10 of 11)	-3.76	-4.98	-1.09	down	1.606	0.68347	0.0747366	0.109266	up	no	15.6788	11.9831	14.0905	10.1407	7.8622	7.99489
chr3	7684463	7684552	90	ENSAPLG00000027566	ENSAPLT00000033890	12747	GZF1	GO:0003676(nucleic acid binding);GO:0005515(protein binding);GO:0005515(protein binding)	NA	NA	NA	GDNF inducible zinc finger protein 1 [Source:HGNC Symbol;Acc:HGNC:15808]	Exon (ENSAPLT00000033890/ENSAPLG00000027566, exon 6 of 11)	-0.418	-0.702	-0.83	down	1.606	0.68347	0.0747366	0.109266	up	no	15.6788	11.9831	14.0905	10.1407	7.8622	7.99489
chr3	7748338	7748428	91	ENSAPLG00000019606	ENSAPLT00000046102	238	SSTR4	GO:0004930(G protein-coupled receptor activity);GO:0004994(somatostatin receptor activity);GO:0007186(G protein-coupled receptor signaling pathway);GO:0016021(integral component of membrane)	04080(Neuroactive ligand-receptor interaction)	K04220	NA	somatostatin receptor 4 [Source:HGNC Symbol;Acc:HGNC:11333]	Exon (ENSAPLT00000046102/ENSAPLG00000019606, exon 1 of 3)	-0.872	-1.43	-3.58	down	0.64001	-0.643834	0.0614115	0.0918948	down	no	1.7897	2.30019	2.77525	2.60502	2.94255	5.17904
chr3	8050747	8053154	2408	ENSAPLG00000013869	ENSAPLT00000014515	10132	XRN2	GO:0000738(DNA catabolic process, exonucleolytic);GO:0001147(transcription termination site sequence-specific DNA binding);GO:0003676(nucleic acid binding);GO:0004527(exonuclease activity);GO:0004534(5'-3' exoribonuclease activity);GO:0005634(nucleus);GO:0005730(nucleolus);GO:0006139(nucleobase-containing compound metabolic process);GO:0007283(spermatogenesis);GO:0008409(5'-3' exonuclease activit…	03008(Ribosome biogenesis in eukaryotes);03018(RNA degradation)	K12619	EC:3.1.13.-	5'-3' exoribonuclease 2 [Source:HGNC Symbol;Acc:HGNC:12836]	Exon (ENSAPLT00000014515/ENSAPLG00000013869, exon 13 of 27)	-1.14	-1.8	0.426	up	2.14704	1.10235	0.000498639	0.00110672	up	yes	38.824	33.5607	51.4583	24.7402	16.829	16.1117
chr3	8108483	8115098	6616	ENSAPLG00000013782	ENSAPLT00000014367	238	KIZ	GO:0005813(centrosome);GO:0007051(spindle organization)	NA	NA	NA	kizuna centrosomal protein [Source:HGNC Symbol;Acc:HGNC:15865]	Exon (ENSAPLT00000014367/ENSAPLG00000013782, exon 1 of 12)	-5.29	-6.71	1.15	up	0.875213	-0.192294	0.112207	0.156903	down	no	6.46654	6.79608	8.84717	10.5903	7.24096	7.43092
chr3	8911578	8911668	91	ENSAPLG00000009140	ENSAPLT00000036791	3963	PLEK	GO:0002244(hematopoietic progenitor cell differentiation);GO:0002576(platelet degranulation);GO:0005080(protein kinase C binding);GO:0005737(cytoplasm);GO:0006904(vesicle docking involved in exocytosis);GO:0007229(integrin-mediated signaling pathway);GO:0010572(positive regulation of platelet activation);GO:0010920(negative regulation of inositol phosphate biosynthetic process);GO:0010925(positiv…	NA	NA	NA	pleckstrin [Source:HGNC Symbol;Acc:HGNC:9070]	5' UTR	-0.331	-0.532	-2	down	3.62634	1.85851	0.0787779	0.114577	up	no	0.466484	0.371404	0.834407	0.17295	0.037834	0.250368
chr3	10402123	10402271	149	ENSAPLG00000009621	ENSAPLT00000010030	532	SLC1A4	GO:0005254(chloride channel activity);GO:0005813(centrosome);GO:0005815(microtubule organizing center);GO:0005882(intermediate filament);GO:0015175(neutral amino acid transmembrane transporter activity);GO:0015180(L-alanine transmembrane transporter activity);GO:0015184(L-cystine transmembrane transporter activity);GO:0015193(L-proline transmembrane transporter activity);GO:0015194(L-serine trans…	NA	NA	NA	solute carrier family 1 member 4 [Source:HGNC Symbol;Acc:HGNC:10942]	Exon (ENSAPLT00000010030/ENSAPLG00000009621, exon 1 of 8)	-0.898	-1.46	2.95	up	21.7551	4.44328	7.81674e-32	1.34963e-30	up	yes	26.3789	25.2204	24.7052	1.39264	0.795562	1.31923
chr3	10402508	10402626	119	ENSAPLG00000009621	ENSAPLT00000010030	177	SLC1A4	GO:0005254(chloride channel activity);GO:0005813(centrosome);GO:0005815(microtubule organizing center);GO:0005882(intermediate filament);GO:0015175(neutral amino acid transmembrane transporter activity);GO:0015180(L-alanine transmembrane transporter activity);GO:0015184(L-cystine transmembrane transporter activity);GO:0015193(L-proline transmembrane transporter activity);GO:0015194(L-serine trans…	NA	NA	NA	solute carrier family 1 member 4 [Source:HGNC Symbol;Acc:HGNC:10942]	Exon (ENSAPLT00000010030/ENSAPLG00000009621, exon 1 of 8)	-0.338	-0.547	-1.68	down	21.7551	4.44328	7.81674e-32	1.34963e-30	up	yes	26.3789	25.2204	24.7052	1.39264	0.795562	1.31923
chr3	12027933	12028679	747	ENSAPLG00000015670	ENSAPLT00000019533	24929	SLC8A1	GO:0005432(calcium:sodium antiporter activity);GO:0005654(nucleoplasm);GO:0005886(plasma membrane);GO:0005887(integral component of plasma membrane);GO:0006816(calcium ion transport);GO:0006883(cellular sodium ion homeostasis);GO:0007154(cell communication);GO:0008092(cytoskeletal protein binding);GO:0016020(membrane);GO:0016021(integral component of membrane);GO:0030501(positive regulation of bo…	04371(Apelin signaling pathway);04020(Calcium signaling pathway);04020(Calcium signaling pathway)	K05849	NA	solute carrier family 8 member A1 [Source:HGNC Symbol;Acc:HGNC:11068]	Exon (ENSAPLT00000019533/ENSAPLG00000015670, exon 2 of 9)	-0.544	-0.924	-0.486	down	18.2552	4.19024	1.36933e-27	1.95012e-26	up	yes	10.2161	9.28191	8.61455	0.5226	0.431016	0.586355
chr3	12317619	12321176	3558	ENSAPLG00000003379	ENSAPLT00000003473	5427	PTK7	GO:0001736(establishment of planar polarity);GO:0001843(neural tube closure);GO:0003281(ventricular septum development);GO:0003401(axis elongation);GO:0004672(protein kinase activity);GO:0004713(protein tyrosine kinase activity);GO:0005524(ATP binding);GO:0005886(plasma membrane);GO:0005887(integral component of plasma membrane);GO:0005911(cell-cell junction);GO:0006468(protein phosphorylation);G…	NA	NA	NA	protein tyrosine kinase 7 (inactive) [Source:HGNC Symbol;Acc:HGNC:9618]	Exon (ENSAPLT00000003473/ENSAPLG00000003379, exon 13 of 19)	-3.46	-4.63	-0.275	down	12.8723	3.6862	1.76124e-46	5.44454e-45	up	yes	428.777	392.103	415.716	31.7146	32.4461	31.9054
chr3	12594746	12594954	209	ENSAPLG00000017921	ENSAPLT00000043826	4635	CNPY3	NA	04330(Notch signaling pathway)	K06056	NA	canopy FGF signaling regulator 3 [Source:HGNC Symbol;Acc:HGNC:11968]	3' UTR	-0.326	-0.523	-1.58	down	2.88153	1.52684	2.86058e-08	1.08308e-07	up	yes	67.5893	70.2942	67.4145	22.1225	23.5336	25.5899
chr3	12597741	12597920	180	ENSAPLG00000017921	ENSAPLT00000043826	1669	CNPY3	NA	04330(Notch signaling pathway)	K06056	NA	canopy FGF signaling regulator 3 [Source:HGNC Symbol;Acc:HGNC:11968]	Exon (ENSAPLT00000043826/ENSAPLG00000017921, exon 1 of 6)	-1.12	-1.77	-0.771	down	2.88153	1.52684	2.86058e-08	1.08308e-07	up	yes	67.5893	70.2942	67.4145	22.1225	23.5336	25.5899
chr3	12601258	12601497	240	ENSAPLG00000004142	ENSAPLT00000004271	15348	POLR1B	GO:0003677(DNA binding);GO:0003899(DNA-directed 5'-3' RNA polymerase activity);GO:0005634(nucleus);GO:0005730(nucleolus);GO:0005829(cytosol);GO:0006351(transcription, DNA-templated);GO:0032549(ribonucleoside binding)	00230(Purine metabolism);00240(Pyrimidine metabolism);03020(RNA polymerase)	K03002	EC:2.7.7.6	RNA polymerase I subunit B [Source:HGNC Symbol;Acc:HGNC:20454]	Exon (ENSAPLT00000004271/ENSAPLG00000004142, exon 15 of 15)	-4.57	-5.91	-0.671	down	7.39288	2.88614	1.13697e-30	1.82854e-29	up	yes	47.8462	45.3736	44.8397	6.83716	6.27531	5.5622
chr3	12601616	12603437	1822	ENSAPLG00000004142	ENSAPLT00000004271	13408	POLR1B	GO:0003677(DNA binding);GO:0003899(DNA-directed 5'-3' RNA polymerase activity);GO:0005634(nucleus);GO:0005730(nucleolus);GO:0005829(cytosol);GO:0006351(transcription, DNA-templated);GO:0032549(ribonucleoside binding)	00230(Purine metabolism);00240(Pyrimidine metabolism);03020(RNA polymerase)	K03002	EC:2.7.7.6	RNA polymerase I subunit B [Source:HGNC Symbol;Acc:HGNC:20454]	Exon (ENSAPLT00000004271/ENSAPLG00000004142, exon 14 of 15)	-5.36	-6.79	-0.847	down	7.39288	2.88614	1.13697e-30	1.82854e-29	up	yes	47.8462	45.3736	44.8397	6.83716	6.27531	5.5622
chr3	12665353	12682358	17006	ENSAPLG00000003737	ENSAPLT00000003830	67033	TTBK1	GO:0004672(protein kinase activity);GO:0005524(ATP binding);GO:0005654(nucleoplasm);GO:0005829(cytosol);GO:0006468(protein phosphorylation);GO:0007611(learning or memory);GO:0010628(positive regulation of gene expression);GO:0010629(negative regulation of gene expression);GO:0018105(peptidyl-serine phosphorylation);GO:0018107(peptidyl-threonine phosphorylation);GO:0018108(peptidyl-tyrosine phosph…	NA	NA	NA	tau tubulin kinase 1 [Source:HGNC Symbol;Acc:HGNC:19140]	3' UTR	-0.701	-1.17	-0.464	down	2.53485	1.3419	0.00042032	0.000944873	up	yes	3.97454	4.06986	3.98436	1.84655	1.39783	1.50098
chr3	12682896	12683165	270	ENSAPLG00000003737	ENSAPLT00000003830	66226	TTBK1	GO:0004672(protein kinase activity);GO:0005524(ATP binding);GO:0005654(nucleoplasm);GO:0005829(cytosol);GO:0006468(protein phosphorylation);GO:0007611(learning or memory);GO:0010628(positive regulation of gene expression);GO:0010629(negative regulation of gene expression);GO:0018105(peptidyl-serine phosphorylation);GO:0018107(peptidyl-threonine phosphorylation);GO:0018108(peptidyl-tyrosine phosph…	NA	NA	NA	tau tubulin kinase 1 [Source:HGNC Symbol;Acc:HGNC:19140]	3' UTR	-1.46	-2.22	-2.2	down	2.53485	1.3419	0.00042032	0.000944873	up	yes	3.97454	4.06986	3.98436	1.84655	1.39783	1.50098
chr3	13084542	13084683	142	ENSAPLG00000002886	ENSAPLT00000002925	0		GO:0004869(cysteine-type endopeptidase inhibitor activity);GO:0004869(cysteine-type endopeptidase inhibitor activity)	NA	NA	NA		Exon (ENSAPLT00000002925/ENSAPLG00000002886, exon 1 of 3)	-24.4	-26.9	-0.527	down	0.387426	-1.36801	1.65069e-13	1.01449e-12	down	yes	363.156	395.429	398.821	943.812	1111.43	932.175
chr3	15582537	15582924	388	ENSAPLG00000002684	ENSAPLT00000002715	1485		GO:0006886(intracellular protein transport);GO:0006897(endocytosis);GO:0016192(vesicle-mediated transport);GO:0030100(regulation of endocytosis);GO:0030131(clathrin adaptor complex)	NA	NA	NA		Exon (ENSAPLT00000002715/ENSAPLG00000002684, exon 1 of 4)	-0.711	-1.19	1.17	up	0.412926	-1.27605	0.0268887	0.043693	down	yes	0.731299	0.444996	0.436154	1.63923	0.922106	1.3436
chr3	15584082	15584231	150	ENSAPLG00000002684	ENSAPLT00000002715	178		GO:0006886(intracellular protein transport);GO:0006897(endocytosis);GO:0016192(vesicle-mediated transport);GO:0030100(regulation of endocytosis);GO:0030131(clathrin adaptor complex)	NA	NA	NA		Exon (ENSAPLT00000002715/ENSAPLG00000002684, exon 1 of 4)	-0.934	-1.51	-1.79	down	0.412926	-1.27605	0.0268887	0.043693	down	yes	0.731299	0.444996	0.436154	1.63923	0.922106	1.3436
chr3	15820911	15822998	2088	ENSAPLG00000016015	ENSAPLT00000016711	6509	MSH6	GO:0000287(magnesium ion binding);GO:0000400(four-way junction DNA binding);GO:0000790(nuclear chromatin);GO:0003677(DNA binding);GO:0003682(chromatin binding);GO:0003684(damaged DNA binding);GO:0003690(double-stranded DNA binding);GO:0005524(ATP binding);GO:0005634(nucleus);GO:0005654(nucleoplasm);GO:0005794(Golgi apparatus);GO:0005829(cytosol);GO:0006281(DNA repair);GO:0006298(mismatch repair);…	03430(Mismatch repair)	K08737	NA	mutS homolog 6 [Source:HGNC Symbol;Acc:HGNC:7329]	Exon (ENSAPLT00000016711/ENSAPLG00000016015, exon 4 of 10)	-3.1	-4.22	-0.363	down	1.93615	0.953192	0.00162015	0.00331972	up	no	33.1892	29.3235	43.2254	19.6269	18.6952	16.2903
chr3	16798300	16798865	566	ENSAPLG00000009654	ENSAPLT00000010081	41019	GALNT14	NA	00512(Mucin type O-glycan biosynthesis);00512(Mucin type O-glycan biosynthesis)	K00710	EC:2.4.1.41	polypeptide N-acetylgalactosaminyltransferase 14 [Source:HGNC Symbol;Acc:HGNC:22946]	Exon (ENSAPLT00000010081/ENSAPLG00000009654, exon 14 of 14)	-0.323	-0.515	-1.15	down	5.85668	2.55008	0.0509967	0.0778102	up	no	1.21265	2.25334	2.23282	0.851824	0	0.121219
chr3	17175388	17179381	3994	ENSAPLG00000014501	ENSAPLT00000015182	149	COQ8A	GO:0005739(mitochondrion);GO:0006744(ubiquinone biosynthetic process);GO:0016301(kinase activity);GO:0016310(phosphorylation);GO:0043531(ADP binding)	NA	NA	NA	coenzyme Q8A [Source:HGNC Symbol;Acc:HGNC:16812]	Exon (ENSAPLT00000015182/ENSAPLG00000014501, exon 1 of 14)	-3.45	-4.63	0.439	up	0.050895	-4.29633	9.2061e-62	4.77653e-60	down	yes	15.1534	22.8368	26.0262	435.546	437.191	385.078
chr3	17681699	17682599	901	ENSAPLG00000024285	ENSAPLT00000027601	10305	NSL1	GO:0000070(mitotic sister chromatid segregation);GO:0000444(MIS12/MIND type complex);GO:0000776(kinetochore);GO:0000777(condensed chromosome kinetochore);GO:0005654(nucleoplasm);GO:0016607(nuclear speck)	NA	NA	NA	NSL1, MIS12 kinetochore complex component [Source:HGNC Symbol;Acc:HGNC:24548]	3' UTR	-1.26	-1.96	0.282	up	1.33312	0.414804	0.578378	0.647134	up	no	17.2275	14.268	20.185	16.6846	11.6204	10.4617
chr3	17692370	17692459	90	ENSAPLG00000011801	ENSAPLT00000042325	579	TATDN3	GO:0016788(hydrolase activity, acting on ester bonds);GO:0016788(hydrolase activity, acting on ester bonds)	NA	NA	NA	TatD DNase domain containing 3 [Source:HGNC Symbol;Acc:HGNC:27010]	5' UTR	-0.577	-0.98	-0.896	down	1.88095	0.911465	0.0478253	0.0734379	up	no	10.3789	12.0522	11.9012	7.48166	4.94763	5.82328
chr3	18473089	18473327	239	ENSAPLG00000019337	ENSAPLT00000025794	297		NA	NA	NA	NA		Exon (ENSAPLT00000025794/ENSAPLG00000019337, exon 1 of 2)	-0.455	-0.768	1.91	up	0.318885	-1.64889	1	1	down	no	0	0	0.075261	0	0	0.236013
chr3	21418043	21418462	420	ENSAPLG00000006427	ENSAPLT00000037352	1435	DUSP10	GO:0000188(inactivation of MAPK activity);GO:0002819(regulation of adaptive immune response);GO:0004725(protein tyrosine phosphatase activity);GO:0005634(nucleus);GO:0005654(nucleoplasm);GO:0005737(cytoplasm);GO:0005794(Golgi apparatus);GO:0005829(cytosol);GO:0006470(protein dephosphorylation);GO:0008138(protein tyrosine/serine/threonine phosphatase activity);GO:0008330(protein tyrosine/threonine…	04010(MAPK signaling pathway);04010(MAPK signaling pathway)	K20216	EC:3.1.3.16;EC:3.1.3.48	dual specificity phosphatase 10 [Source:HGNC Symbol;Acc:HGNC:3065]	Exon (ENSAPLT00000037352/ENSAPLG00000006427, exon 1 of 3)	-2.33	-3.3	0.558	up	0.0921002	-3.44065	1.45763e-50	5.24392e-49	down	yes	4.48866	4.24434	6.03941	52.5139	62.9903	44.8907
chr3	21418612	21419030	419	ENSAPLG00000006427	ENSAPLT00000006658	0	DUSP10	GO:0000188(inactivation of MAPK activity);GO:0002819(regulation of adaptive immune response);GO:0004725(protein tyrosine phosphatase activity);GO:0005634(nucleus);GO:0005654(nucleoplasm);GO:0005737(cytoplasm);GO:0005794(Golgi apparatus);GO:0005829(cytosol);GO:0006470(protein dephosphorylation);GO:0008138(protein tyrosine/serine/threonine phosphatase activity);GO:0008330(protein tyrosine/threonine…	04010(MAPK signaling pathway);04010(MAPK signaling pathway)	K20216	EC:3.1.3.16;EC:3.1.3.48	dual specificity phosphatase 10 [Source:HGNC Symbol;Acc:HGNC:3065]	5' UTR	-5.13	-6.52	0.501	up	0.0921002	-3.44065	1.45763e-50	5.24392e-49	down	yes	4.48866	4.24434	6.03941	52.5139	62.9903	44.8907
chr3	21732958	21733098	141	ENSAPLG00000006905	ENSAPLT00000020436	6725	AIDA	GO:0005737(cytoplasm);GO:0019904(protein domain specific binding);GO:0043496(regulation of protein homodimerization activity);GO:0043508(negative regulation of JUN kinase activity);GO:0046329(negative regulation of JNK cascade);GO:0046329(negative regulation of JNK cascade)	NA	NA	NA	axin interactor, dorsalization associated [Source:HGNC Symbol;Acc:HGNC:25761]	Exon (ENSAPLT00000020436/ENSAPLG00000006905, exon 2 of 10)	-0.805	-1.33	0.63	up	2.00615	1.00443	0.00148537	0.00306606	up	yes	53.0128	51.64	58.7232	26.7166	27.6636	27.0573
chr3	22102321	22102471	151	ENSAPLG00000011682	ENSAPLT00000019366	36069	TP53BP2	GO:0002039(p53 binding);GO:0005515(protein binding);GO:0005634(nucleus);GO:0005737(cytoplasm);GO:0005829(cytosol);GO:0030054(cell junction);GO:0042802(identical protein binding);GO:0048471(perinuclear region of cytoplasm);GO:0051059(NF-kappaB binding);GO:0072332(intrinsic apoptotic signaling pathway by p53 class mediator);GO:1900119(positive regulation of execution phase of apoptosis);GO:1900119(…	NA	NA	NA	tumor protein p53 binding protein 2 [Source:HGNC Symbol;Acc:HGNC:12000]	Exon (ENSAPLT00000019366/ENSAPLG00000011682, exon 13 of 18)	-5.57	-7.02	0.638	up	0.788762	-0.342338	0.0120752	0.021128	down	no	16.3537	15.1353	27.7944	28.6638	26.3653	20.131
chr3	23580374	23580763	390	ENSAPLG00000007948	ENSAPLT00000008285	8749	UTP25	GO:0005634(nucleus);GO:0005730(nucleolus);GO:0030163(protein catabolic process);GO:0031648(protein destabilization)	NA	NA	NA	UTP25, small subunit processor component [Source:HGNC Symbol;Acc:HGNC:28440]	3' UTR	-2	-2.9	0.819	up	1.87666	0.90817	0.0145819	0.0250931	up	no	14.329	11.7907	16.9726	7.16013	9.1019	6.70017
chr3	24301044	24301373	330	ENSAPLG00000004030	ENSAPLT00000018290	6344	TOMM20	GO:0005739(mitochondrion);GO:0005740(mitochondrial envelope);GO:0005741(mitochondrial outer membrane);GO:0005742(mitochondrial outer membrane translocase complex);GO:0006605(protein targeting);GO:0006626(protein targeting to mitochondrion);GO:0006886(intracellular protein transport);GO:0015450(P-P-bond-hydrolysis-driven protein transmembrane transporter activity);GO:0044233(mitochondria-associate…	NA	NA	NA	translocase of outer mitochondrial membrane 20 [Source:HGNC Symbol;Acc:HGNC:20947]	3' UTR	-1.4	-2.14	-0.362	down	1.50083	0.585764	0.170152	0.225109	up	no	23.5941	17.6589	23.261	15.6296	15.4375	11.9184
chr3	24308446	24309331	886	ENSAPLG00000004344	ENSAPLT00000004466	5688	RBM34	GO:0003676(nucleic acid binding);GO:0005634(nucleus);GO:0005730(nucleolus)	NA	NA	NA	RNA binding motif protein 34 [Source:HGNC Symbol;Acc:HGNC:28965]	Exon (ENSAPLT00000004466/ENSAPLG00000004344, exon 10 of 11)	-1.23	-1.92	-0.365	down	3.75618	1.90927	8.9429e-10	3.93922e-09	up	yes	70.4172	70.4131	88.4836	24.3594	14.9349	21.7554
chr3	24566779	24567257	479	ENSAPLG00000006342	ENSAPLT00000006672	5966		GO:0007040(lysosome organization)	NA	NA	NA		Exon (ENSAPLT00000006672/ENSAPLG00000006342, exon 4 of 5)	-0.413	-0.694	-1.8	down	12.1106	3.5982	0.0260789	0.042506	up	yes	0.744152	0.455163	0.385257	0	0	0.130842
chr3	24927620	24929977	2358	ENSAPLG00000013330	ENSAPLT00000013877	0	SPRTN	GO:0003677(DNA binding);GO:0005634(nucleus);GO:0005654(nucleoplasm);GO:0006281(DNA repair);GO:0006974(cellular response to DNA damage stimulus);GO:0009411(response to UV);GO:0016607(nuclear speck);GO:0019985(translesion synthesis);GO:0031398(positive regulation of protein ubiquitination);GO:0043130(ubiquitin binding);GO:0070530(K63-linked polyubiquitin modification-dependent protein binding)	00230(Purine metabolism);04213(Longevity regulating pathway - multiple species)	K08049	EC:4.6.1.1	SprT-like N-terminal domain [Source:HGNC Symbol;Acc:HGNC:25356]	Exon (ENSAPLT00000013877/ENSAPLG00000013330, exon 1 of 5)	-4.05	-5.32	-0.325	down	0.628302	-0.67047	0.00142087	0.00294233	down	no	9.14002	6.39431	12.4955	15.8839	16.3153	12.4129
chr3	25513631	25513871	241	ENSAPLG00000013477	ENSAPLT00000014091	56506	SIPA1L2	GO:0005096(GTPase activator activity);GO:0005515(protein binding);GO:0051056(regulation of small GTPase mediated signal transduction);GO:0051056(regulation of small GTPase mediated signal transduction)	04015(Rap1 signaling pathway);04015(Rap1 signaling pathway)	K17702	NA	signal induced proliferation associated 1 like 2 [Source:HGNC Symbol;Acc:HGNC:23800]	Exon (ENSAPLT00000014091/ENSAPLG00000013477, exon 3 of 23)	-0.297	-0.46	-1.77	down	0.908199	-0.13892	0.206645	0.267538	down	no	2.57066	2.64178	4.17209	4.04993	3.93014	2.35305
chr3	25984386	25984864	479	ENSAPLG00000014876	ENSAPLT00000015521	48639	TRERF1	GO:0003676(nucleic acid binding);GO:0003677(DNA binding);GO:0005634(nucleus);GO:0005654(nucleoplasm);GO:0005730(nucleolus);GO:0005829(cytosol)	NA	NA	NA	transcriptional regulating factor 1 [Source:HGNC Symbol;Acc:HGNC:18273]	Exon (ENSAPLT00000015521/ENSAPLG00000014876, exon 3 of 16)	-0.98	-1.58	-0.509	down	12.4519	3.63829	1.17991e-45	3.49071e-44	up	yes	37.2672	35.5953	38.398	3.28011	2.80077	2.85438
[truncated: 1,620 more rows]
