# Supplementary material for: m6A and miRNA jointly regulate the development of breast muscles in duck embryonic stages
Source: Front Vet Sci. 2022 Oct 24;9:933850. doi: 10.3389/fvets.2022.933850 (PMC9637736; doi:10.3389/fvets.2022.933850)
Supplement: Supplementary file 2 [file Table_2.XLSX]

## Sheet: Sheet1
Supplementary file 2. The GO results of target genes of 6 miRNAs obtained from association analysis of miRNAs-seq, mRNA-seq and m6A-seq Data.
GO_ID	GO_Term	GO_function	GO_class	Genes	S gene number	TS gene number	B gene number	TB gene number	pvalue
GO:0046854	phosphatidylinositol phosphorylation	biological_process	10	ENSAPLG00000012924;ENSAPLG00000002437	2	12	5	1784	0.000410341
GO:0048015	phosphatidylinositol-mediated signaling	biological_process	10	ENSAPLG00000012924;ENSAPLG00000002437	2	12	6	1784	0.000613209
GO:0016301	kinase activity	molecular_function	10	ENSAPLG00000002437;ENSAPLG00000012924	2	12	14	1784	0.00361028
GO:0044029	hypomethylation of CpG island	biological_process	10	ENSAPLG00000012924	1	12	1	1784	0.00672646
GO:0036066	protein O-linked fucosylation	biological_process	10	ENSAPLG00000012587	1	12	1	1784	0.00672646
GO:0014041	regulation of neuron maturation	biological_process	10	ENSAPLG00000015982	1	12	1	1784	0.00672646
GO:2000811	negative regulation of anoikis	biological_process	10	ENSAPLG00000012924	1	12	1	1784	0.00672646
GO:0034506	chromosome, centromeric core domain	cellular_component	10	ENSAPLG00000015981	1	12	1	1784	0.00672646
GO:2000653	regulation of genetic imprinting	biological_process	10	ENSAPLG00000012924	1	12	1	1784	0.00672646
GO:0005942	phosphatidylinositol 3-kinase complex	cellular_component	10	ENSAPLG00000012924	1	12	1	1784	0.00672646
GO:0005943	phosphatidylinositol 3-kinase complex, class IA	cellular_component	10	ENSAPLG00000012924	1	12	1	1784	0.00672646
GO:0043560	insulin receptor substrate binding	molecular_function	10	ENSAPLG00000012924	1	12	1	1784	0.00672646
GO:0036065	fucosylation	biological_process	10	ENSAPLG00000012587	1	12	1	1784	0.00672646
GO:0030031	cell projection assembly	biological_process	10	ENSAPLG00000015982	1	12	1	1784	0.00672646
GO:1900027	regulation of ruffle assembly	biological_process	10	ENSAPLG00000015981	1	12	1	1784	0.00672646
GO:1990023	mitotic spindle midzone	cellular_component	10	ENSAPLG00000015981	1	12	1	1784	0.00672646
GO:0060982	coronary artery morphogenesis	biological_process	10	ENSAPLG00000010567	1	12	1	1784	0.00672646
GO:0004348	glucosylceramidase activity	molecular_function	10	ENSAPLG00000011544	1	12	1	1784	0.00672646
GO:0072356	chromosome passenger complex localization to kinetochore	biological_process	10	ENSAPLG00000015981	1	12	1	1784	0.00672646
GO:0043457	regulation of cellular respiration	biological_process	10	ENSAPLG00000012924	1	12	1	1784	0.00672646
GO:0051987	positive regulation of attachment of spindle microtubules to kinetochore	biological_process	10	ENSAPLG00000015981	1	12	1	1784	0.00672646
GO:0021894	cerebral cortex GABAergic interneuron development	biological_process	10	ENSAPLG00000015982	1	12	1	1784	0.00672646
GO:0040014	regulation of multicellular organism growth	biological_process	10	ENSAPLG00000012924	1	12	2	1784	0.0134114
GO:0048873	homeostasis of number of cells within a tissue	biological_process	10	ENSAPLG00000015982	1	12	2	1784	0.0134114
GO:0042592	homeostatic process	biological_process	10	ENSAPLG00000010567	1	12	2	1784	0.0134114
GO:0048365	Rac GTPase binding	molecular_function	10	ENSAPLG00000015981	1	12	2	1784	0.0134114
GO:0035004	phosphatidylinositol 3-kinase activity	molecular_function	10	ENSAPLG00000012924	1	12	2	1784	0.0134114
GO:0033630	positive regulation of cell adhesion mediated by integrin	biological_process	10	ENSAPLG00000015982	1	12	2	1784	0.0134114
GO:0051932	synaptic transmission, GABAergic	biological_process	10	ENSAPLG00000015982	1	12	2	1784	0.0134114
GO:0006665	sphingolipid metabolic process	biological_process	10	ENSAPLG00000011544	1	12	2	1784	0.0134114
GO:1900025	negative regulation of substrate adhesion-dependent cell spreading	biological_process	10	ENSAPLG00000015981	1	12	2	1784	0.0134114
GO:0006337	nucleosome disassembly	biological_process	10	ENSAPLG00000010567	1	12	2	1784	0.0134114
GO:0007229	integrin-mediated signaling pathway	biological_process	10	ENSAPLG00000015981	1	12	2	1784	0.0134114
GO:0005614	interstitial matrix	cellular_component	10	ENSAPLG00000002792	1	12	2	1784	0.0134114
GO:0030163	protein catabolic process	biological_process	10	ENSAPLG00000007948	1	12	2	1784	0.0134114
GO:0031941	filamentous actin	cellular_component	10	ENSAPLG00000015982	1	12	2	1784	0.0134114
GO:0043491	protein kinase B signaling	biological_process	10	ENSAPLG00000012924	1	12	2	1784	0.0134114
GO:0032281	AMPA glutamate receptor complex	cellular_component	10	ENSAPLG00000002792	1	12	2	1784	0.0134114
GO:0072358	cardiovascular system development	biological_process	10	ENSAPLG00000010567	1	12	2	1784	0.0134114
GO:0071333	cellular response to glucose stimulus	biological_process	10	ENSAPLG00000012924	1	12	3	1784	0.0200551
GO:2000270	negative regulation of fibroblast apoptotic process	biological_process	10	ENSAPLG00000012924	1	12	3	1784	0.0200551
GO:0031267	small GTPase binding	molecular_function	10	ENSAPLG00000015981	1	12	3	1784	0.0200551
GO:1900026	positive regulation of substrate adhesion-dependent cell spreading	biological_process	10	ENSAPLG00000015982	1	12	3	1784	0.0200551
GO:0048041	focal adhesion assembly	biological_process	10	ENSAPLG00000015981	1	12	3	1784	0.0200551
GO:0010811	positive regulation of cell-substrate adhesion	biological_process	10	ENSAPLG00000002792	1	12	3	1784	0.0200551
GO:0048568	embryonic organ development	biological_process	10	ENSAPLG00000010567	1	12	3	1784	0.0200551
GO:0030295	protein kinase activator activity	molecular_function	10	ENSAPLG00000012924	1	12	3	1784	0.0200551
GO:0012505	endomembrane system	cellular_component	10	ENSAPLG00000015982	1	12	3	1784	0.0200551
GO:0016310	phosphorylation	biological_process	10	ENSAPLG00000012924	1	12	4	1784	0.0266578
GO:0010971	positive regulation of G2/M transition of mitotic cell cycle	biological_process	10	ENSAPLG00000015981	1	12	4	1784	0.0266578
GO:0016303	1-phosphatidylinositol-3-kinase activity	molecular_function	10	ENSAPLG00000012924	1	12	4	1784	0.0266578
GO:0060038	cardiac muscle cell proliferation	biological_process	10	ENSAPLG00000010567	1	12	4	1784	0.0266578
GO:0031519	PcG protein complex	cellular_component	10	ENSAPLG00000023146	1	12	4	1784	0.0266578
GO:0050905	neuromuscular process	biological_process	10	ENSAPLG00000015982	1	12	4	1784	0.0266578
GO:0010762	regulation of fibroblast migration	biological_process	10	ENSAPLG00000015981	1	12	4	1784	0.0266578
GO:0001932	regulation of protein phosphorylation	biological_process	10	ENSAPLG00000012924	1	12	4	1784	0.0266578
GO:0022604	regulation of cell morphogenesis	biological_process	10	ENSAPLG00000015982	1	12	4	1784	0.0266578
GO:0050885	neuromuscular process controlling balance	biological_process	10	ENSAPLG00000015982	1	12	4	1784	0.0266578
GO:0030426	growth cone	cellular_component	10	ENSAPLG00000015982	1	12	4	1784	0.0266578
GO:0034260	negative regulation of GTPase activity	biological_process	10	ENSAPLG00000015981	1	12	5	1784	0.0332196
GO:0051895	negative regulation of focal adhesion assembly	biological_process	10	ENSAPLG00000015981	1	12	5	1784	0.0332196
GO:0048306	calcium-dependent protein binding	molecular_function	10	ENSAPLG00000015982	1	12	5	1784	0.0332196
GO:0005793	endoplasmic reticulum-Golgi intermediate compartment	cellular_component	10	ENSAPLG00000012587	1	12	5	1784	0.0332196
GO:0006006	glucose metabolic process	biological_process	10	ENSAPLG00000012924	1	12	5	1784	0.0332196
GO:0014065	phosphatidylinositol 3-kinase signaling	biological_process	10	ENSAPLG00000012924	1	12	5	1784	0.0332196
GO:0030514	negative regulation of BMP signaling pathway	biological_process	10	ENSAPLG00000002792	1	12	6	1784	0.0397409
GO:0033138	positive regulation of peptidyl-serine phosphorylation	biological_process	10	ENSAPLG00000012924	1	12	6	1784	0.0397409
GO:0043005	neuron projection	cellular_component	10	ENSAPLG00000015982	1	12	6	1784	0.0397409
GO:0003007	heart morphogenesis	biological_process	10	ENSAPLG00000010567	1	12	6	1784	0.0397409
GO:0031648	protein destabilization	biological_process	10	ENSAPLG00000007948	1	12	6	1784	0.0397409
GO:0031901	early endosome membrane	cellular_component	10	ENSAPLG00000015981	1	12	6	1784	0.0397409
GO:0071944	cell periphery	cellular_component	10	ENSAPLG00000015982	1	12	7	1784	0.0462219
GO:0045747	positive regulation of Notch signaling pathway	biological_process	10	ENSAPLG00000012587	1	12	7	1784	0.0462219
GO:0045666	positive regulation of neuron differentiation	biological_process	10	ENSAPLG00000002792	1	12	7	1784	0.0462219
GO:0005801	cis-Golgi network	cellular_component	10	ENSAPLG00000012587	1	12	7	1784	0.0462219
GO:0090630	activation of GTPase activity	biological_process	10	ENSAPLG00000015981	1	12	7	1784	0.0462219
GO:0005604	basement membrane	cellular_component	10	ENSAPLG00000002792	1	12	8	1784	0.0526627
GO:0030027	lamellipodium	cellular_component	10	ENSAPLG00000012924	1	12	8	1784	0.0526627
GO:0060612	adipose tissue development	biological_process	10	ENSAPLG00000012924	1	12	8	1784	0.0526627
GO:0001889	liver development	biological_process	10	ENSAPLG00000012924	1	12	9	1784	0.0590636
GO:0097009	energy homeostasis	biological_process	10	ENSAPLG00000012924	1	12	9	1784	0.0590636
GO:0045184	establishment of protein localization	biological_process	10	ENSAPLG00000015981	1	12	9	1784	0.0590636
GO:0030334	regulation of cell migration	biological_process	10	ENSAPLG00000015981	1	12	9	1784	0.0590636
GO:0007264	small GTPase mediated signal transduction	biological_process	10	ENSAPLG00000015982	1	12	10	1784	0.0654249
GO:0031012	extracellular matrix	cellular_component	10	ENSAPLG00000002792	1	12	10	1784	0.0654249
GO:0031175	neuron projection development	biological_process	10	ENSAPLG00000015982	1	12	11	1784	0.0717467
GO:0043524	negative regulation of neuron apoptotic process	biological_process	10	ENSAPLG00000012924	1	12	11	1784	0.0717467
GO:0030036	actin cytoskeleton organization	biological_process	10	ENSAPLG00000015982	1	12	12	1784	0.0780293
GO:0000790	nuclear chromatin	cellular_component	10	ENSAPLG00000023146	1	12	13	1784	0.0842729
GO:0030336	negative regulation of cell migration	biological_process	10	ENSAPLG00000010567	1	12	16	1784	0.102772
GO:0043025	neuronal cell body	cellular_component	10	ENSAPLG00000015982	1	12	17	1784	0.108862
GO:0003924	GTPase activity	molecular_function	10	ENSAPLG00000015982	1	12	18	1784	0.114913
GO:0010468	regulation of gene expression	biological_process	10	ENSAPLG00000012924	1	12	20	1784	0.126904
GO:0010629	negative regulation of gene expression	biological_process	10	ENSAPLG00000012587	1	12	21	1784	0.132844
GO:0030496	midbody	cellular_component	10	ENSAPLG00000015981	1	12	24	1784	0.150441
GO:0008017	microtubule binding	molecular_function	10	ENSAPLG00000015981	1	12	25	1784	0.156233
GO:0019904	protein domain specific binding	molecular_function	10	ENSAPLG00000015981	1	12	27	1784	0.167709
GO:0005525	GTP binding	molecular_function	10	ENSAPLG00000015982	1	12	27	1784	0.167709
GO:0008285	negative regulation of cell population proliferation	biological_process	10	ENSAPLG00000010567	1	12	29	1784	0.179043
GO:0005654	nucleoplasm	cellular_component	10	ENSAPLG00000010567;ENSAPLG00000012587;ENSAPLG00000023146	3	12	240	1784	0.211824
GO:0005622	intracellular	cellular_component	10	ENSAPLG00000015982	1	12	35	1784	0.212199
GO:0019901	protein kinase binding	molecular_function	10	ENSAPLG00000015981	1	12	38	1784	0.228313
GO:0048471	perinuclear region of cytoplasm	cellular_component	10	ENSAPLG00000015982	1	12	38	1784	0.228313
GO:0005615	extracellular space	cellular_component	10	ENSAPLG00000002792	1	12	42	1784	0.249327
GO:0005886	plasma membrane	cellular_component	10	ENSAPLG00000010567;ENSAPLG00000015981	2	12	173	1784	0.327131
GO:0005509	calcium ion binding	molecular_function	10	ENSAPLG00000023845	1	12	73	1784	0.395253
GO:0005730	nucleolus	cellular_component	10	ENSAPLG00000007948	1	12	74	1784	0.399495
GO:0005794	Golgi apparatus	cellular_component	10	ENSAPLG00000012587	1	12	77	1784	0.412056
GO:0000122	negative regulation of transcription by RNA polymerase II	biological_process	10	ENSAPLG00000023146	1	12	77	1784	0.412056
GO:0005634	nucleus	cellular_component	10	ENSAPLG00000015981;ENSAPLG00000007948;ENSAPLG00000023146	3	12	406	1784	0.53745
GO:0006355	regulation of transcription, DNA-templated	biological_process	10	ENSAPLG00000010567	1	12	112	1784	0.541841
GO:0003677	DNA binding	molecular_function	10	ENSAPLG00000010567	1	12	138	1784	0.620627
GO:0003676	nucleic acid binding	molecular_function	10	ENSAPLG00000010567	1	12	143	1784	0.634272
GO:0016020	membrane	cellular_component	10	ENSAPLG00000015981	1	12	184	1784	0.730322
GO:0005515	protein binding	molecular_function	10	ENSAPLG00000002792;ENSAPLG00000012937	2	12	420	1784	0.81359
GO:0005829	cytosol	cellular_component	10	ENSAPLG00000023146	1	12	260	1784	0.849918
