# Supplementary material for: m6A and miRNA jointly regulate the development of breast muscles in duck embryonic stages
Source: Front Vet Sci. 2022 Oct 24;9:933850. doi: 10.3389/fvets.2022.933850 (PMC9637736; doi:10.3389/fvets.2022.933850)
Supplement: Supplementary file 3 [file Table_3.XLSX]

## Sheet: Sheet1
Supplementary file 3. The KEGG pathway analysis results of target genes of miRNAs obtained from association analysis of miRNAs-seq, mRNA-seq and m6A-seq Data.
pathway_id	pathway_name	Genes	S gene number	TS gene number	B gene number	TB gene number	pvalue
4370	VEGF signaling pathway	ENSAPLG00000015982;ENSAPLG00000012924	2	7	7	757	0.00150742
562	Inositol phosphate metabolism	ENSAPLG00000012924;ENSAPLG00000002437	2	7	19	757	0.0116371
4070	Phosphatidylinositol signaling system	ENSAPLG00000012924;ENSAPLG00000002437	2	7	21	757	0.0141644
4810	Regulation of actin cytoskeleton	ENSAPLG00000012924;ENSAPLG00000015982	2	7	23	757	0.0169131
511	Other glycan degradation	ENSAPLG00000011544	1	7	3	757	0.0275214
4510	Focal adhesion	ENSAPLG00000015982;ENSAPLG00000012924	2	7	30	757	0.028184
4260	Cardiac muscle contraction	ENSAPLG00000023845	1	7	8	757	0.0719484
600	Sphingolipid metabolism	ENSAPLG00000011544	1	7	9	757	0.0806217
4914	Progesterone-mediated oocyte maturation	ENSAPLG00000012924	1	7	10	757	0.0892256
5164	Influenza A	ENSAPLG00000012924	1	7	10	757	0.0892256
4012	ErbB signaling pathway	ENSAPLG00000012924	1	7	10	757	0.0892256
4520	Adherens junction	ENSAPLG00000015982	1	7	10	757	0.0892256
3008	Ribosome biogenesis in eukaryotes	ENSAPLG00000002792	1	7	11	757	0.0977603
4620	Toll-like receptor signaling pathway	ENSAPLG00000012924	1	7	12	757	0.106226
4933	AGE-RAGE signaling pathway in diabetic complications	ENSAPLG00000012924	1	7	14	757	0.122954
4142	Lysosome	ENSAPLG00000011544	1	7	19	757	0.163605
4625	C-type lectin receptor signaling pathway	ENSAPLG00000012924	1	7	19	757	0.163605
4261	Adrenergic signaling in cardiomyocytes	ENSAPLG00000023845	1	7	20	757	0.171538
4210	Apoptosis	ENSAPLG00000012924	1	7	20	757	0.171538
4910	Insulin signaling pathway	ENSAPLG00000012924	1	7	21	757	0.179407
4068	FoxO signaling pathway	ENSAPLG00000012924	1	7	22	757	0.187212
4371	Apelin signaling pathway	ENSAPLG00000023845	1	7	23	757	0.194952
4150	mTOR signaling pathway	ENSAPLG00000012924	1	7	24	757	0.20263
4310	Wnt signaling pathway	ENSAPLG00000015982	1	7	26	757	0.217797
4140	Autophagy - animal	ENSAPLG00000012924	1	7	26	757	0.217797
4218	Cellular senescence	ENSAPLG00000012924	1	7	27	757	0.225287
4120	Ubiquitin mediated proteolysis	ENSAPLG00000015981	1	7	32	757	0.261824
4010	MAPK signaling pathway	ENSAPLG00000015982	1	7	36	757	0.28998
